# Supplementary material
Source: PubMed Central journal article supplement (PMC3859423)
Supplement: JCI70626sd.pdf [file JCI70626sd.pdf]

## **Supplemental Material**

### **Supplemental Methods**

#### **Cell sorting**

Cell sorting was performed on FACS Aria (BD Biosciences) after size exclusion of dead cells. GC B cells were sorted from the spleen of SRBC- or NP-CGG immunized animals as CD19<sup>+</sup>CD38<sup>lo</sup>CD95<sup>hi</sup>. FO B cells were sorted as CD19<sup>+</sup>CD23<sup>+</sup>CD21<sup>+</sup>CD95<sup>lo</sup>; MZ B cells as CD21<sup>hi</sup>CD23<sup>lo</sup>CD19<sup>+</sup> and peritoneal cavity B-1 B cells as CD19<sup>hi</sup>CD23<sup>lo</sup>B220<sup>lo</sup>. IgG1<sup>+</sup> memory B cells were B220<sup>+</sup>IgG1<sup>+</sup>CD95<sup>lo</sup>CD38<sup>+</sup> B cells. Splenic plasma cells were sorted after NP-FICOLL immunization as B220<sup>lo</sup>CD19<sup>lo</sup>CD138<sup>+</sup>.

#### **In vitro culture of primary B and DLBCL cells**

Mouse A20 and I.29 $\mu$ <sup>+</sup> (1) and human SU-DHL-4, SU-DHL-6 and WSU-DLCL2 DLBCL lymphoma cell lines were cultured in RPMI-1640 medium supplemented with 2mM L-glutamine and 10% heat-inactivated FCS. A20 cells were stimulated with 10 ng/ml mL-21 (Preprotech) and I.29 $\mu$ <sup>+</sup> cells with 20  $\mu$ g/ml LPS (*Escherichia Coli* 055:B5; Sigma Aldrich). Mouse splenic B cells were isolated by MACS using a depletion protocol (Miltenyi Biotec). iGB cultures were established as previously described (2). Induction of PC differentiation was achieved replacing IL-4 with IL-21 (10 ng/ml; Preprotech) in the culture medium of d 4 iGB cultures. Cells were analyzed 2-4 days after IL-21 stimulation. For in vitro proliferation assays, primary B cells were seeded at a density of 5 x 10<sup>5</sup> cells/ml in B cell medium (DMEM, 10% heat-inactivated FCS, 2 mM L-glutamine, 50 $\mu$ M 2-Mercaptoethanol, 1mM Sodium Pyruvate, 0.1 mM non-essential amino acids, 100 units/ml penicillin, and 100  $\mu$ g/ml streptomycin) containing LPS (20  $\mu$ g/ml *Escherichia Coli* 055:B5; Sigma) or functional-grade RP-105/CD180-specific antibody (1  $\mu$ g/ml; RP/14, Biolegend). B

cells were counted daily after exclusion of dead cells by trypan blue staining. To assess IgG1 CSR, primary B cells were activated with 20 $\mu$ g/ml LPS (; *Escherichia Coli* 055:B5; Sigma Aldrich) and 25 ng/ml IL-4 (R&D Systems) and scored by flow cytometry after 4 d of culture.

### **Bioinformatic analysis of ChIP-seq data**

**Mapping of reads.** After eliminating artifacts with FASTX-Toolkit v.0.0.13.2, reads were aligned to the mm9 genome using Bowtie v.0.12.8 (3), allowing up to two mismatches per read and discarding reads with more than one mapping. Duplicate reads were removed with Samtool rmdup v 0.1.18. ChIP-sequencing gave respectively a total of  $\approx$ 16 million (H3K27me3) and  $\approx$ 4 million (H3K4me3) of uniquely mapped reads.

### **Identification of enriched domains**

We used MACS v.1.4.0 (4) to identify genomic regions of enrichment relative to the input. We used default parameters for H3K4me3, while for H3K27me3 we disabled the shifting model and dynamic lambda, and used a *p*-value threshold of 10e-10.

### **Annotation**

We assigned enriched regions to genes by determining for each RefSeq transcript, whether an enriched domain overlapped with a  $\pm$ 5kb (H3K27me3) or  $\pm$ 2.5kb (H3K4me3) region around the transcription start site. Transcripts were then collapsed to genes symbols using BioMart in July 2012 (5). Venn diagrams showing overlap between different datasets were prepared using BioVenn (<http://www.cmbi.ru.nl/cdd/biovenn/>).

### **Gene Ontology**

Gene Set Enrichment analysis for Gene Ontology, KEGG and Reactome terms was performed with Cytoskape software (6), using ClueGO (7) plugin. A hypergeometric

test was run to identify the ten most enriched Gene Ontology categories. P-values were adjusted applying Bonferroni step down correction. All terms with a FDR <0.01 were considered enriched.

### **Analysis of the transcriptome profile of mouse GC B cells**

Gene chip microarray data were generated by the Immunological Genome Consortium (IMMGEN) and retrieved from Gene Expression Omnibus (GEO), accessing the Platform GPL6246 (GSM538207, GSM538208, GSM538209). Raw data (CEL files) were analyzed with R software version 2.16.0 (<http://www.r-project.org>). Signal intensities were normalized using robust multichip analysis (RMA) and quantiles algorithms. Log<sub>2</sub>-transformed expression values were generated applying the median polish method. Probe annotation was performed using the Mogene10stranscriptcluster.db package through Bioconductor (<http://www.bioconductor.org/>). Probe expression values were calculated from log<sub>2</sub> data of the three independent biological replicates.

### **Treatment of DLBCL cells with EZH2 inhibitor GSK343**

SU-DHL-4 and SU-DHL-6 DLBCL cells were treated with 2.5 μM GSK343 (Structural Genomics Consortium, Toronto, Canada) for a total of 12 days seeding cells every other day at a density of 2x10<sup>5</sup> cells/ml when medium containing GSK343 or vehicle (DMSO) was refreshed. Viable cells were counted by the Trypan Blue exclusion method.

### **RNA Interference**

EED knockdown was achieved infecting B cells with pLKO lentiviral vectors expressing short hairpin RNAs against respectively mouse (TRCN95720, TRCN95722, TRCN95723, MISSION, Sigma Aldrich) or human (TRCN21206, MISSION, Sigma Aldrich) EED. Puromycin-resistant infected B cells were analyzed.

### **Expression of *BLIMP1* in DLBCL cells**

Five million WSU-DLCL-2 DLBCL cells were transfected with 5  $\mu$ g of pcDNA3.1 BLIMP1-NeoR expression vector (kindly provided by T. Maniatis, Columbia University, New York) or pcDNA3.1 NeoR empty vector (Invitrogen), as control. Electroporation of plasmid DNA was performed using the Neon Transfection system (Life Technologies).

### **References**

1. van Anken, E., Romijn, E.P., Maggioni, C., Mezghrani, A., Sitia, R., Braakman, I., and Heck, A.J. 2003. Sequential waves of functionally related proteins are expressed when B cells prepare for antibody secretion. *Immunity* 18:243-253.
2. Nojima, T., Haniuda, K., Moutai, T., Matsudaira, M., Mizokawa, S., Shiratori, I., Azuma, T., and Kitamura, D. 2011. In-vitro derived germinal centre B cells differentially generate memory B or plasma cells in vivo. *Nature communications* 2:465.
3. Langmead, B., Trapnell, C., Pop, M., and Salzberg, S.L. 2009. Ultrafast and memory-efficient alignment of short DNA sequences to the human genome. *Genome biology* 10:R25.
4. Zhang, Y., Liu, T., Meyer, C.A., Eeckhoute, J., Johnson, D.S., Bernstein, B.E., Nusbaum, C., Myers, R.M., Brown, M., Li, W., et al. 2008. Model-based analysis of ChIP-Seq (MACS). *Genome biology* 9:R137.
5. Kinsella, R.J., Kahari, A., Haider, S., Zamora, J., Proctor, G., Spudich, G., Almeida-King, J., Staines, D., Derwent, P., Kerhornou, A., et al. 2011. Ensembl BioMart: a hub for data retrieval across taxonomic space. *Database : the journal of biological databases and curation* 2011:bar030.

6. Smoot, M.E., Ono, K., Ruscheinski, J., Wang, P.L., and Ideker, T. Cytoscape 2.8: new features for data integration and network visualization. *Bioinformatics* 27:431-432.
7. Bindea, G., Mlecnik, B., Hackl, H., Charoentong, P., Tosolini, M., Kirilovsky, A., Fridman, W.H., Pages, F., Trajanoski, Z., and Galon, J. 2009. ClueGO: a Cytoscape plug-in to decipher functionally grouped gene ontology and pathway annotation networks. *Bioinformatics* 25:1091-1093.

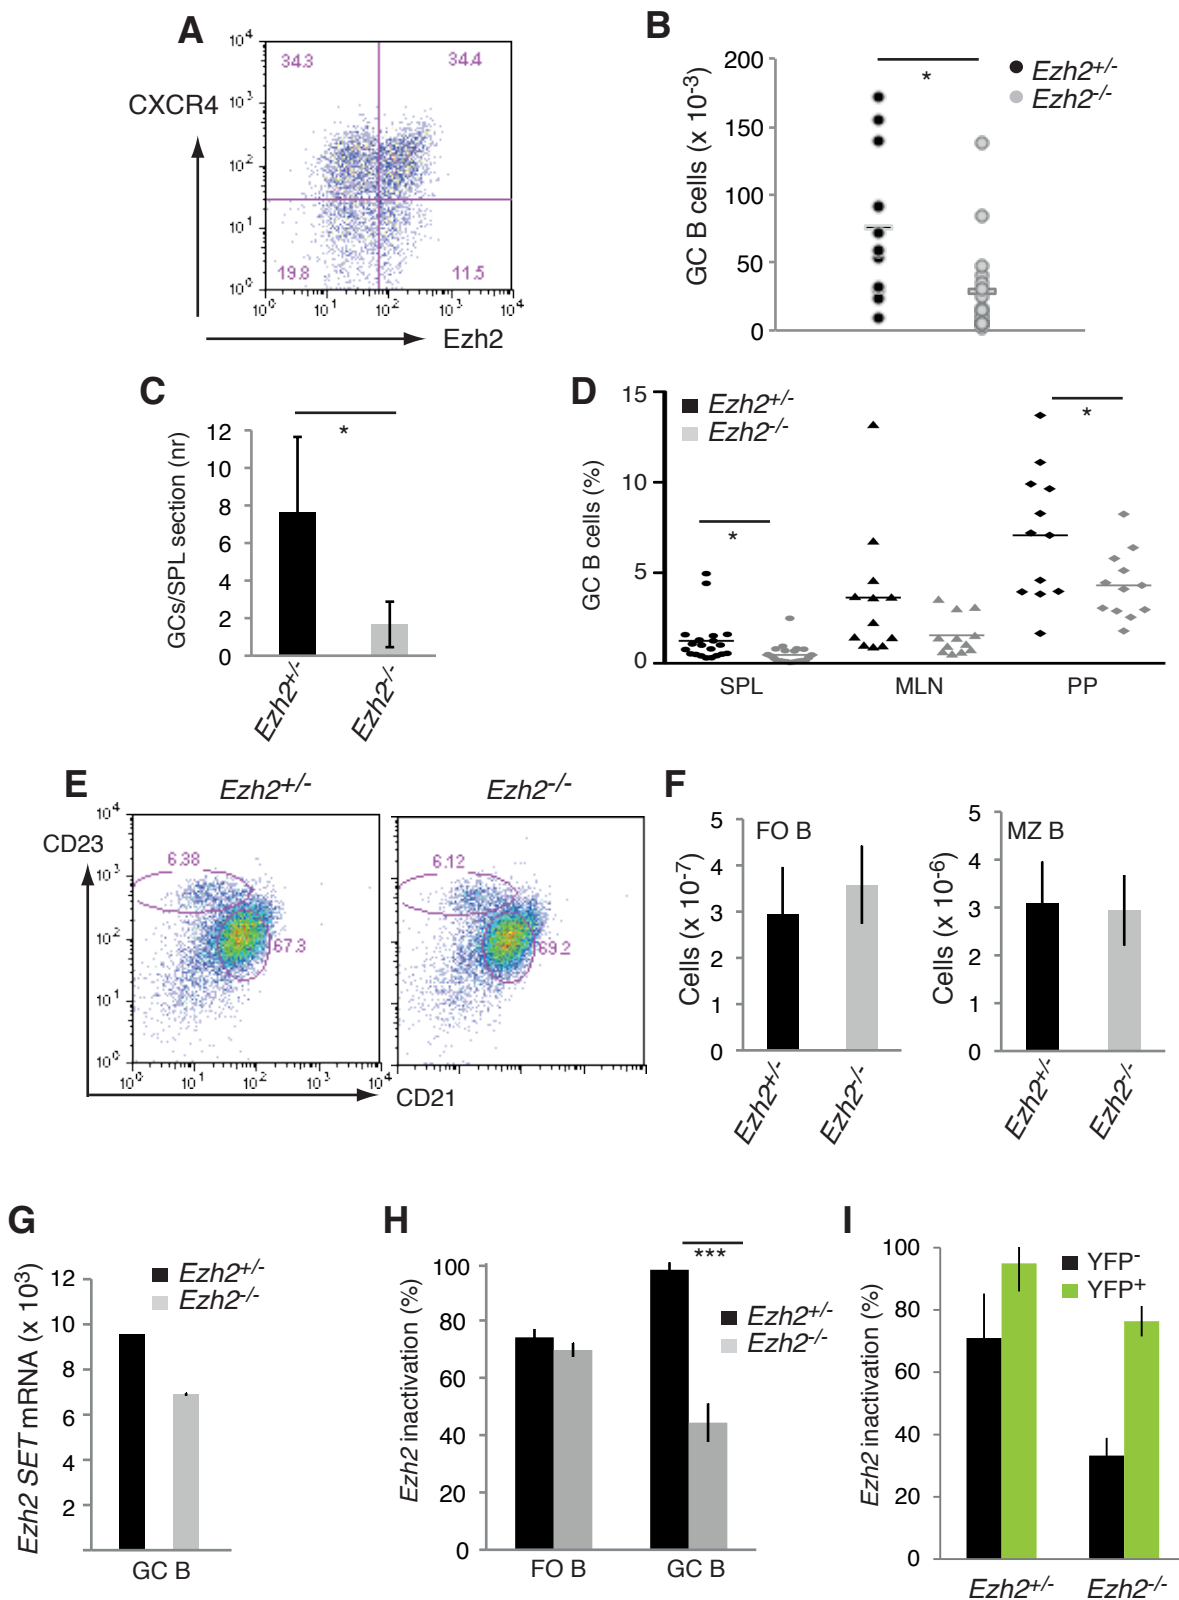

**Supplemental Figure 1.** Ezh2 is required in GC B cells but not in FO and MZ B cells. **(A)** Ezh2 expression in centroblasts (Cxcr4<sup>+</sup>) and centrocytes (Cxcr4<sup>-</sup>). Numbers indicate percentage of CD19<sup>+</sup>CD95<sup>hi</sup> GC B cells. **(B)** Splenic GC B cells in immunized *Ezh2* control (*Ezh2*<sup>+/-</sup>; *Ezh2*<sup>fl/+</sup>:*Cγ1-cre*, *n*=10) and mutant (*Ezh2*<sup>-/-</sup>; *Ezh2*<sup>fl/-</sup>:*Cγ1-cre*, *n*=12) mice. Each symbol represents one mouse. **(C)** Quantification of PNA<sup>+</sup> GCs in immunized *Ezh2* control (*Ezh2*<sup>+/-</sup>; *Ezh2*<sup>fl/+</sup>:*Cγ1-cre*, *n*=6) and mutant (*Ezh2*<sup>-/-</sup>; *Ezh2*<sup>fl/-</sup>:*Cγ1-cre*, *n*=6) mice. Columns indicate mean  $\pm$  s.d. \**P*=0.013 (*t*-test). **(D)** GC B cell frequency in spleen (SPL), mesenteric lymph nodes (MLN) and Peyer's patches (PP) of *Ezh2* control (*Ezh2*<sup>+/-</sup>; *Ezh2*<sup>fl/+</sup>:*Cr2-cre*, *n*=11) and mutant (*Ezh2*<sup>-/-</sup>; *Ezh2*<sup>fl/-</sup>:*Cr2-cre*, *n*=11) mice, measured by FACS. Each symbol represents one mouse. Bars indicate mean. \**P*= 0.018 (SPL), \**P*=0.046 (PP) (*t*-test). **(E)** Frequency of splenic FO (CD23<sup>+</sup>CD21<sup>+</sup>) and MZ (CD23<sup>lo</sup>CD21<sup>hi</sup>) B cells in *Ezh2* control (*Ezh2*<sup>+/-</sup>; *Ezh2*<sup>fl/+</sup>:*Cr2-cre*) and mutant (*Ezh2*<sup>-/-</sup>; *Ezh2*<sup>fl/-</sup>:*Cr2-cre*) mice. CD19<sup>+</sup> B cells are displayed. **(F)** Splenic FO and MZ B cells in *Ezh2* control (*Ezh2*<sup>+/-</sup>; *Ezh2*<sup>fl/+</sup>:*Cr2-cre*, *n*=8) and mutant (*Ezh2*<sup>-/-</sup>; *Ezh2*<sup>fl/-</sup>:*Cr2-cre*, *n*=9) mice. Columns indicate mean  $\pm$  s.d. **(G)** Full-length *Ezh2* transcripts in GC B cells of *Ezh2* control (*Ezh2*<sup>+/-</sup>; *Ezh2*<sup>fl/+</sup>:*Cγ1-cre*, *n*=2) and mutant (*Ezh2*<sup>-/-</sup>; *Ezh2*<sup>fl/-</sup>:*Cγ1-cre*, *n*=2) mice. Columns indicate mean  $\pm$  s.d. **(H)** *Ezh2* inactivation in FO and GC B cells of *Ezh2* control (*Ezh2*<sup>+/-</sup>; *Ezh2*<sup>fl/+</sup>:*Cr2-cre*, *n*=7) and mutant (*Ezh2*<sup>-/-</sup>; *Ezh2*<sup>fl/-</sup>:*Cr2-cre*, *n*=10) mice. Columns indicate mean  $\pm$  s.d. \*\*\**P*= 5.5  $\times 10^{-5}$  (*t*-test). **(I)** *Ezh2* inactivation in control (*Ezh2*<sup>+/-</sup>; *Ezh2*<sup>fl/+</sup>:*Cγ1-cre*:*R26-yfp*, *n*=2) and mutant (*Ezh2*<sup>-/-</sup>; *Ezh2*<sup>fl/-</sup>:*Cγ1-cre*:*R26-yfp*, *n*=2) GC B cells identified based on YFP expression. Data represent 5 (**B**, **D**, **E**, **H**), 2 (**C**, **F**, **G**, **I**), and 1 (**A**) experiments.

**A** d 60 NP-CGG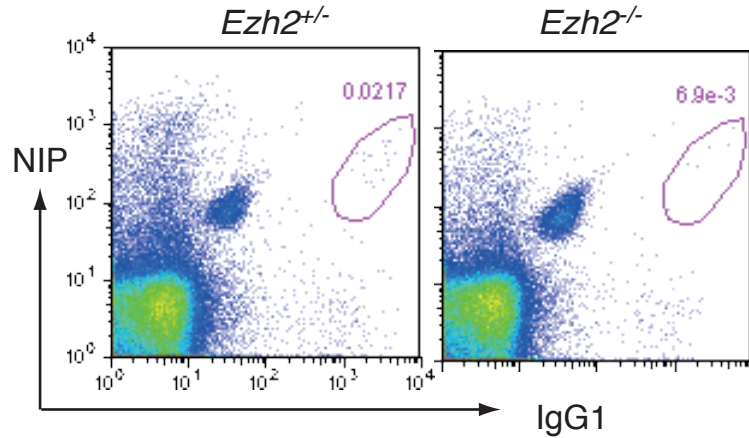**B** d 14 NP-CGG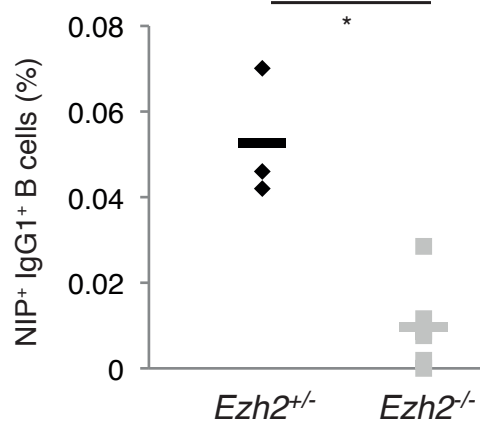**C**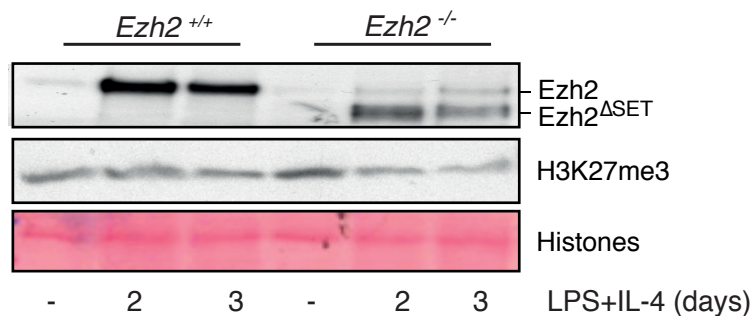

**Supplemental Figure 2.** Impaired formation of IgG1<sup>+</sup> memory B cells upon GC B cell inactivation of *Ezh2*. **(A)** Representative FACS analysis of splenic PNA<sup>lo</sup>Igκ<sup>-</sup>CD95<sup>-</sup>CD38<sup>+</sup>CD19<sup>+</sup> gated B cells stained for NIP binding and surface IgG1 to identify antigen-specific IgG1<sup>+</sup> memory B cells 60 d after NP-CGG immunization of *Ezh2* control (*Ezh2*<sup>+/-</sup>; *Ezh2*<sup>fl/+</sup>:*Cγ1-cre*) and mutant (*Ezh2*<sup>-/-</sup>; *Ezh2*<sup>fl/fl</sup>:*Cγ1-cre*) mice. **(B)** Frequency of antigen-specific IgG1<sup>+</sup> memory B cells (NIP<sup>+</sup>IgG1<sup>+</sup>PNA<sup>lo</sup>Igκ<sup>-</sup>CD95<sup>-</sup>CD38<sup>+</sup>CD19<sup>+</sup>) measured by FACS analysis in the spleen of *Ezh2* control (*Ezh2*<sup>+/-</sup>; *Ezh2*<sup>fl/+</sup>:*Cγ1-cre*, *n*=4) and mutant (*Ezh2*<sup>-/-</sup>; *Ezh2*<sup>fl/fl</sup>:*Cγ1-cre*, *n*=7) mice 14 d after NP-CGG immunization. Each symbol represents one mouse. Bars indicate median. \**P*=0.022 (*t*-test). **(C)** Immunoblotting analysis of *Ezh2* and H3K27me3 levels in *Ezh2* control (*Ezh2*<sup>+/+</sup>; *Ezh2*<sup>+/+</sup>:*Cr2-cre*) and mutant (*Ezh2*<sup>-/-</sup>; *Ezh2*<sup>fl/fl</sup>:*Cr2-cre*) B cells stimulated for the indicated days with LPS and IL4. Ponceau staining of histones was included as loading control. Cre-mediated recombination of the *Ezh2*<sup>fl</sup> allele leads to the expression of a truncated, catalytic-inert form of the protein (*Ezh2*<sup>ΔSET</sup>). Data represent 4 **(C)** and 2 **(A, B)** experiments.

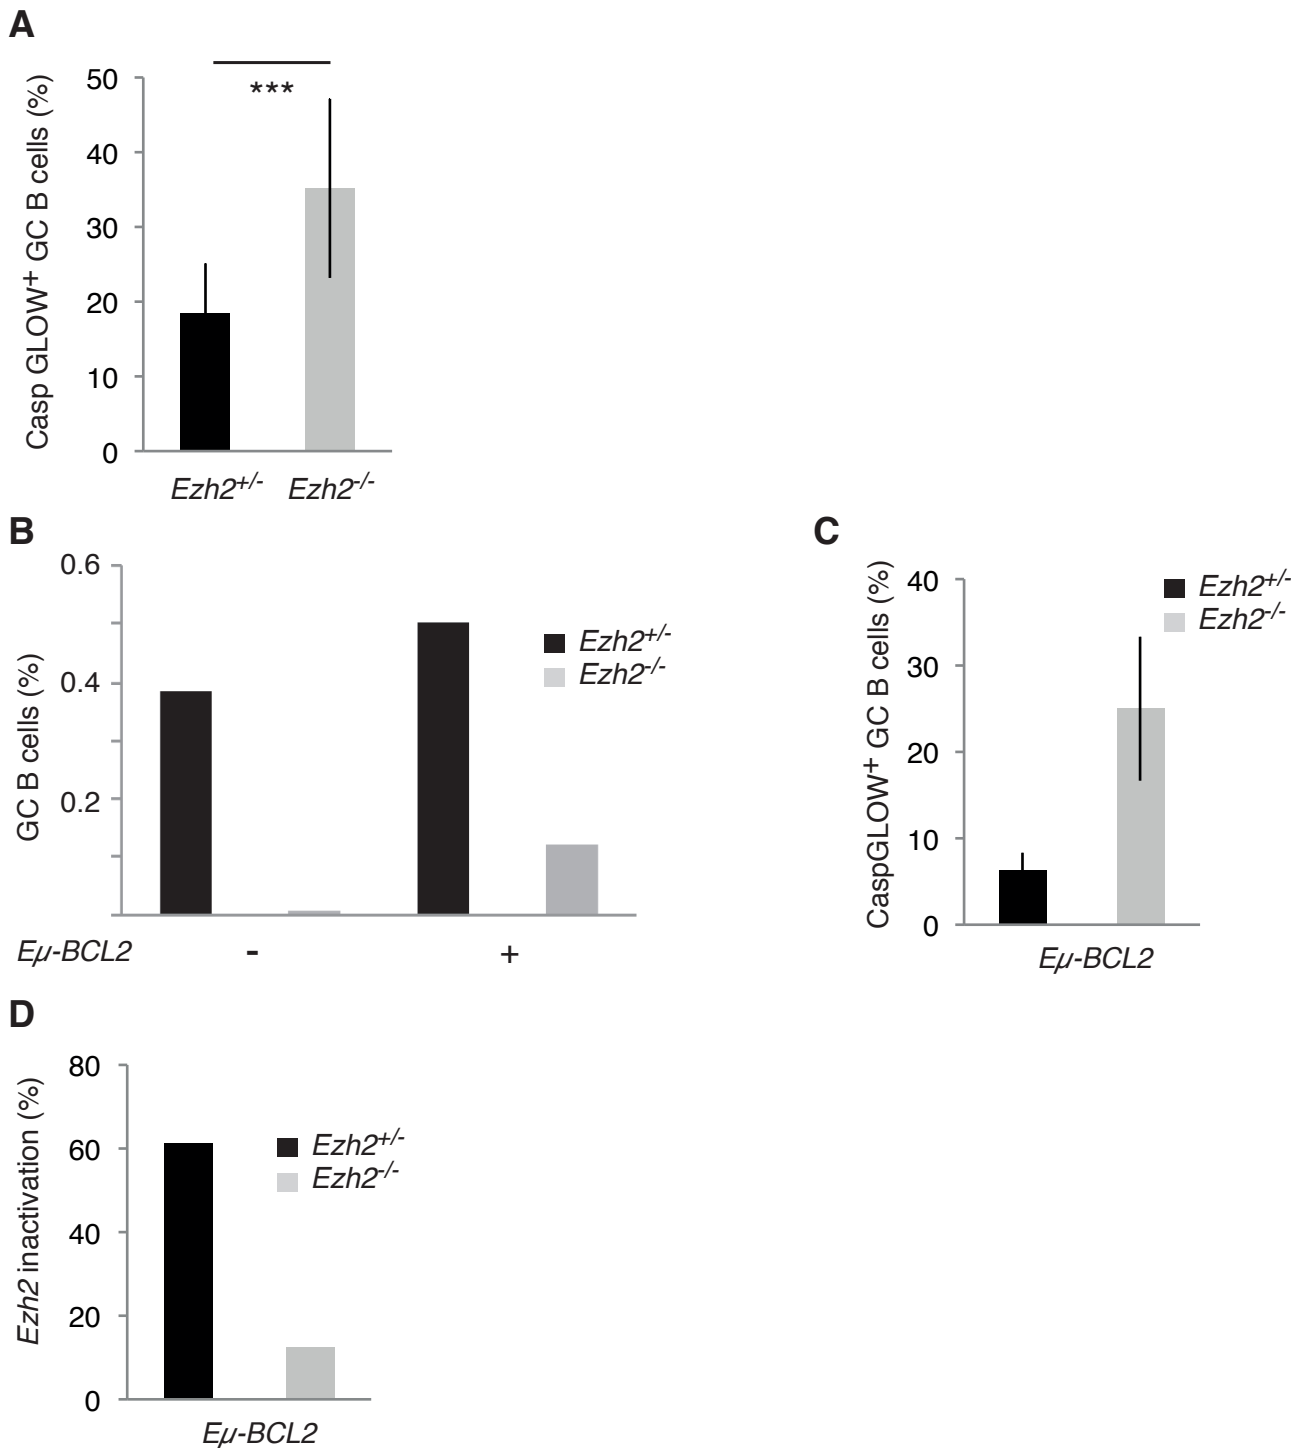

**Supplemental Figure 3.** BCL2 does not protect *Ezh2* mutant GC B cells from apoptosis. **(A)** Frequency of splenic CaspGLOW<sup>+</sup> apoptotic GC B cells in *Ezh2* control (*Ezh2*<sup>+/-</sup>; *Ezh2*<sup>fl/fl</sup>:*Cr2-cre*, *n*=9) and mutant (*Ezh2*<sup>-/-</sup>; *Ezh2*<sup>fl/fl</sup>:*Cr2-cre*, *n*=12) mice 12-14 d after NP-CGG immunization. Samples were analyzed by flow cytometry. Columns indicate mean + s.d.; \*\*\**P*=0.0007 (*t*-test). **(B)** Frequency of splenic GC B cells in d14 NP-CGG-immunized *Ezh2* control (*Ezh2*<sup>fl/fl</sup>:*Cr2-cre*, *n*=2) and mutant (*Ezh2*<sup>fl/fl</sup>:*Cr2-cre*, *n*=2) mice, before and after expression of the *Eμ*BCL2 transgene, measured by flow cytometry. Bars indicate mean. **(C)** Frequency of CaspGLOW<sup>+</sup> splenic GC B cells after NP-CGG immunization of *Ezh2* control (*Ezh2*<sup>+/-</sup>; *Ezh2*<sup>fl/fl</sup>:*Cr2-cre*, *n*=3) and mutant (*Ezh2*<sup>-/-</sup>; *Ezh2*<sup>fl/fl</sup>:*Cr2-cre*, *n*=4) mice expressing the *Eμ*-BCL2 transgene. Columns indicate mean + s.d. **(D)** Efficiency of *Ezh2* inactivation measured by genomic qPCR analysis in GC B cells sorted from the spleen, 12-14 d after NP-CGG immunization of *Ezh2* control (*Ezh2*<sup>+/-</sup>; *Ezh2*<sup>fl/fl</sup>:*Cγ1-cre*, *n*=2) and mutant (*Ezh2*<sup>-/-</sup>; *Ezh2*<sup>fl/fl</sup>:*Cγ1-cre*, *n*=2) mice expressing the *Eμ*-BCL2 transgene. Data are representative of 5 **(A)**, 3 **(B)** 2 **(C)** and one **(D)** experiments.



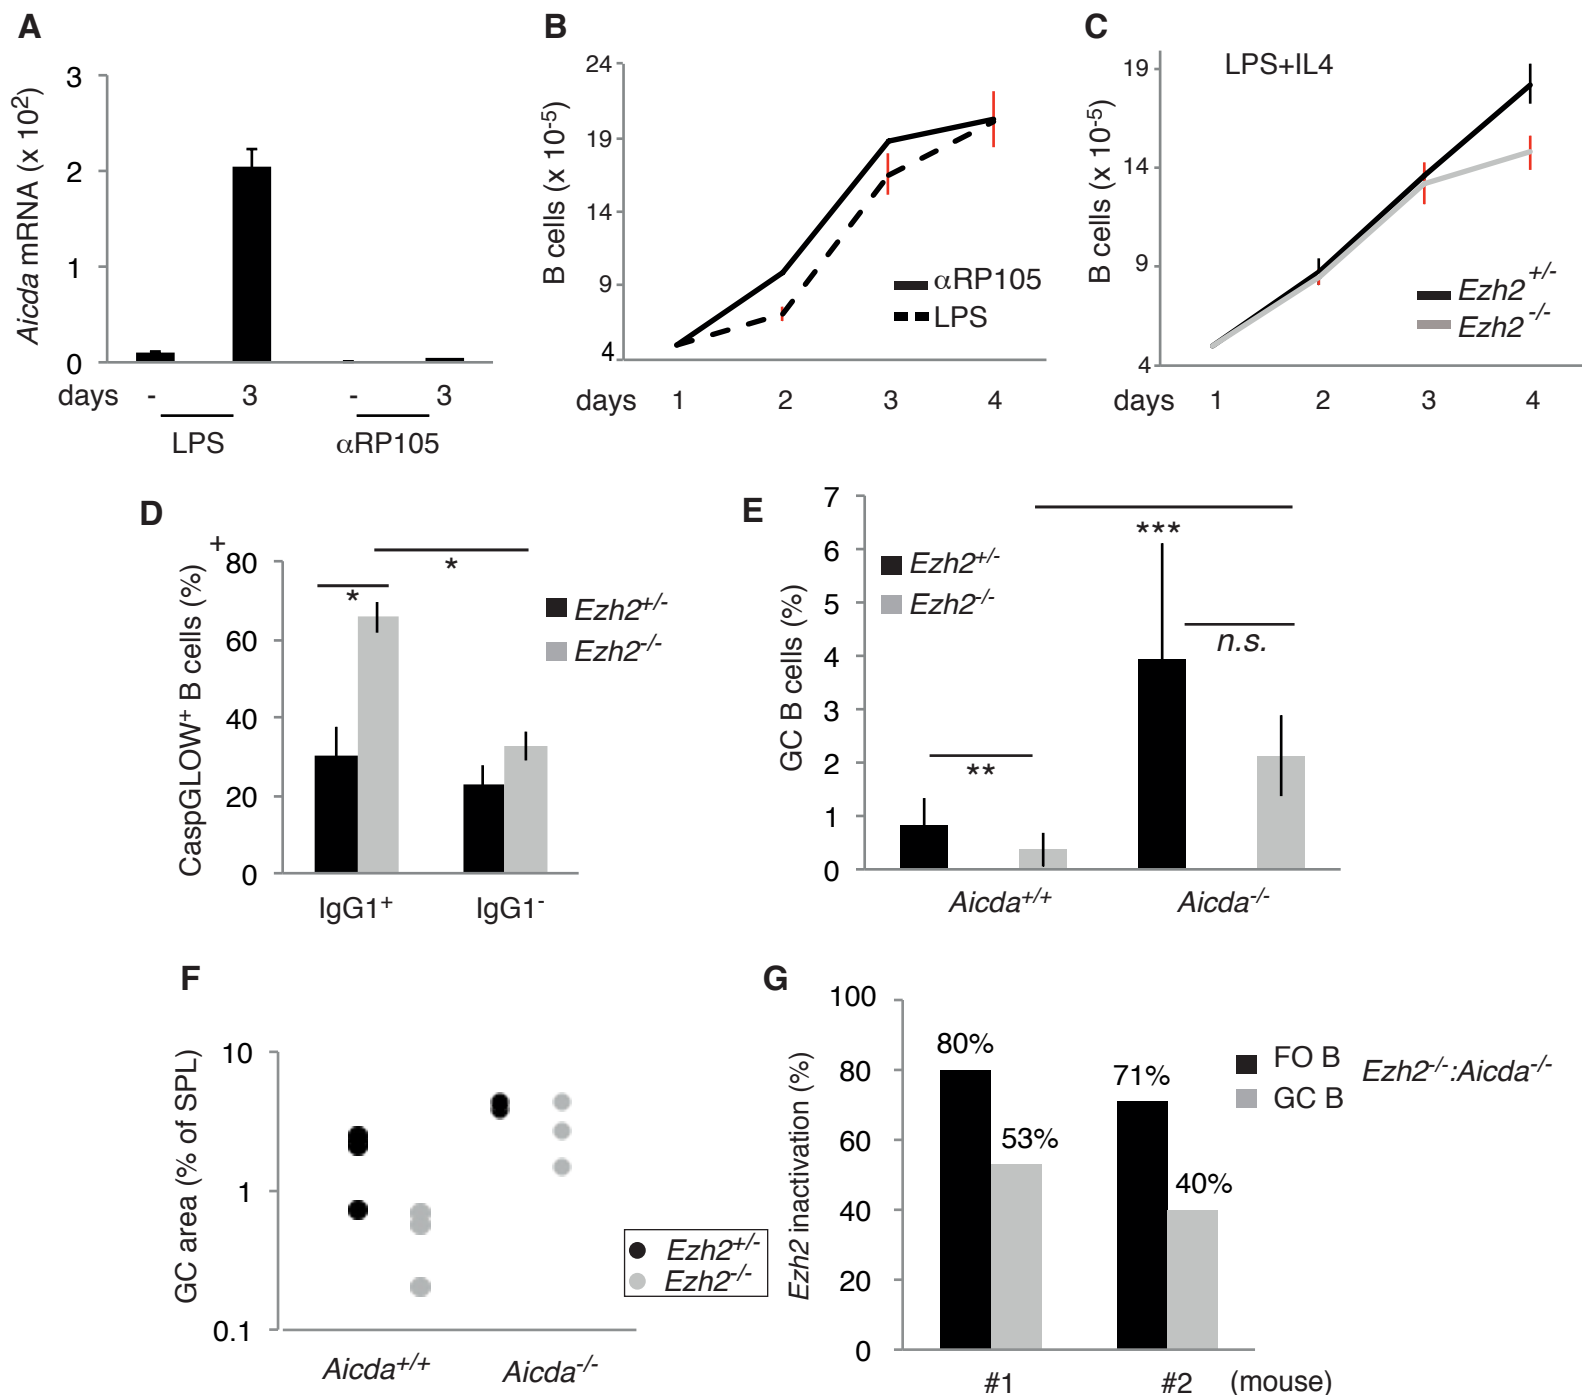

**Supplemental Figure 4.** AID is responsible for increased apoptosis of *Ezh2* mutant GC B cells. **(A)** Quantification of *Aicda* transcripts in primary splenic B cells before (-) and 3 days after (3) *in vitro* stimulation with LPS or anti-RP105; values are relative to *Rplp0* expression. Columns indicate mean  $\pm$  s.d. of triplicates. **(B)** Number of *Ezh2* mutant (*Ezh2*<sup>fl/fl</sup>:*Cr2-cre*) primary B cells retrieved at the indicated days of LPS or anti-RP105 stimulation. **(C)** Number of viable splenic *Ezh2* control (*Ezh2*<sup>+/-</sup>; *Ezh2*<sup>fl/fl</sup>:*Cr2-cre*) and mutant (*Ezh2*<sup>fl/fl</sup>:*Cr2-cre*) B cells stimulated *in vitro* with LPS and IL-4 for the indicated days. **(D)** Frequency of CaspGLOW<sup>+</sup> cells among *Ezh2* control (*Ezh2*<sup>+/-</sup>; *Ezh2*<sup>fl/fl</sup>:*Cr2-cre*, *n*=5) and mutant (*Ezh2*<sup>-/-</sup>; *Ezh2*<sup>fl/fl</sup>:*Cr2-cre*, *n*=5) IgG1<sup>+</sup> and IgG1<sup>-</sup> B cells 3 d after *in vitro* stimulation with LPS and IL-4, revealed by FACS analysis. \**P*=0.03. **(E)** Frequency of GC B cells in the spleen of NP-CGG immunized *Ezh2* control (*Ezh2*<sup>+/-</sup>; *Ezh2*<sup>fl/fl</sup>:*Cr2-cre*) and mutant (*Ezh2*<sup>-/-</sup>; *Ezh2*<sup>fl/fl</sup>:*Cr2-cre*) mice, in the presence (*Ezh2*<sup>+/-</sup> *n*=7; *Ezh2*<sup>-/-</sup> *n*=6) or absence (*Ezh2*<sup>+/-</sup> *n*=11; *Ezh2*<sup>-/-</sup> *n*=13) of AID expression (*Aicda*<sup>+/+</sup>/*Aicda*<sup>-/-</sup>), assessed by flow cytometry. Columns indicate mean  $\pm$  s.d. \*\*\**P*=1.6  $\times 10^{-5}$  (*t*-test). **(F)** Histological quantification of the area occupied by IgD<sup>+</sup>PNA<sup>+</sup> GCs in splenic sections of d12 NP-CGG immunized *Ezh2* control (*Ezh2*<sup>+/-</sup>; *Ezh2*<sup>fl/fl</sup>:*Cr2-cre*) and mutant (*Ezh2*<sup>-/-</sup>; *Ezh2*<sup>fl/fl</sup>:*Cr2-cre*) mice. **(G)** Degree of *Ezh2* inactivation measured by genomic qPCR analysis in sorted FO B and GC B cells of two *Ezh2*:*Aicda* double mutant mice (*Ezh2*<sup>-/-</sup>:*Aicda*<sup>-/-</sup>:*Cr2-cre*) in which normalization of apoptosis is yet accompanied to an under representation of cells carrying both *Ezh2* mutant alleles. Columns indicate mean value. Data are representative of 9 (**E**, **G**) and 2 (**A**, **B**, **C**, **D**, **F**) experiments. *n.s.*= not significant.

**A**H3K27me3<sup>+</sup>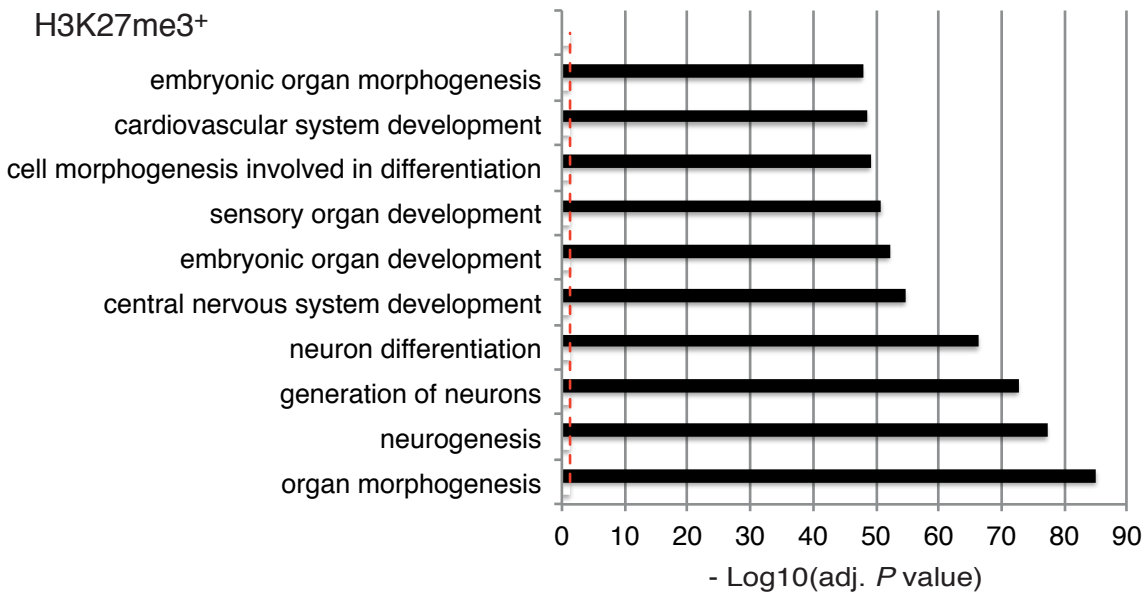**B**H3K4me3<sup>+</sup>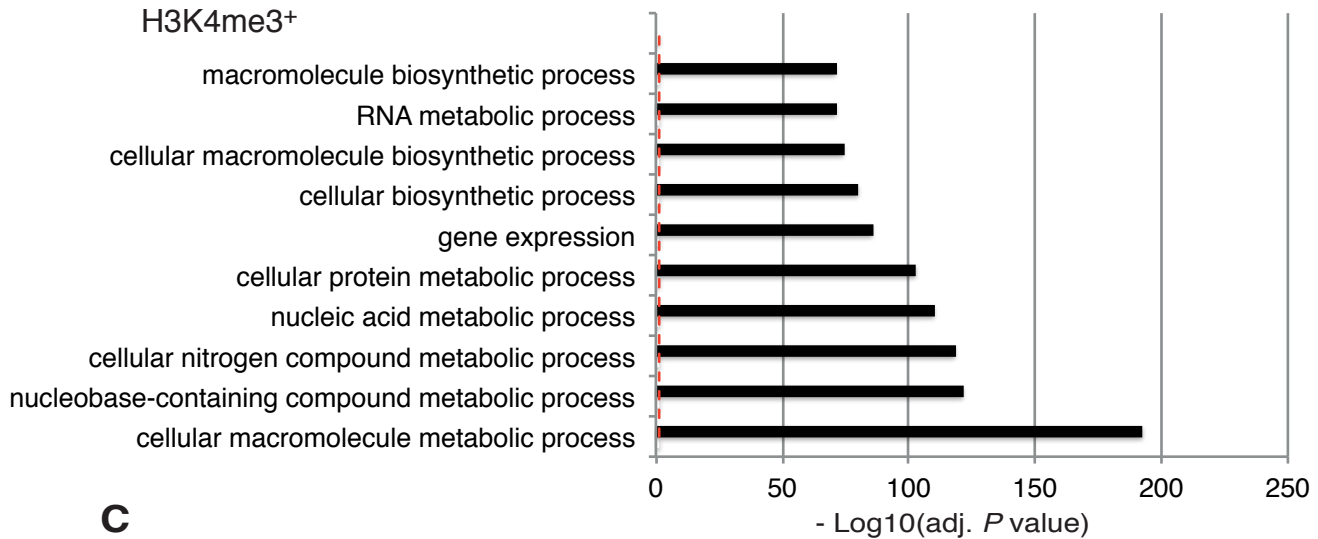**C**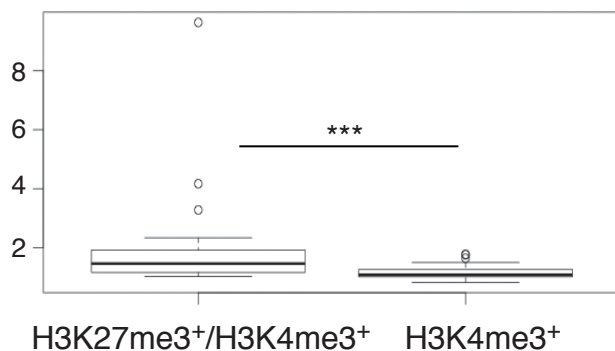

**Supplemental Figure 5.** Functional categories of H3K27me3 and H3K4me3 target genes in GC B cells. Gene Ontology representation of genes marked either by H3K27me3 (A) or H3K4me3 (B). Bars represent  $P$ -values in  $-\text{Log}_{10}$  scale of the corresponding biological processes. Dashed lines identify the significance threshold ( $P=0.01$ ). (C) Box plot representation of fold-change in transcript levels of bivalent genes (H3K27me3<sup>+</sup>/H3K4me3<sup>+</sup>;  $n=7$ ) and genes marked only by H3K4me3 ( $n=39$ ) in *Ezh2* mutant (*Ezh2*<sup>fl/fl</sup>:*Cγ1-cre*,  $n=17$ ) versus control (*Ezh2*<sup>fl/+</sup>:*Cγ1-cre*,  $n=15$ ) GC B cell samples. Expression values were calculated relative to *Rplp0* expression. (Wilcoxon rank sum test. \*\* $P=0.004$ ).

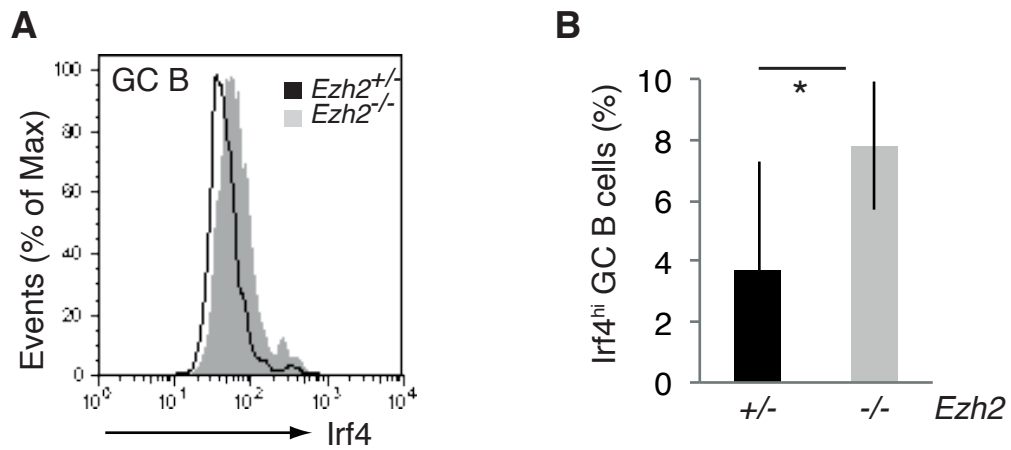

**Supplemental Figure 6.** *Ezh2* mutant B cells express higher levels of Irf4 in the GC. **(A)** Representative FACS analysis of Irf4 protein levels in *Ezh2* control (*Ezh2*<sup>+/-</sup>; *Ezh2*<sup>fl/+</sup>:*Cγ1-cre* /*Cr2-cre*; *n*=12, black thin line) and mutant (*Ezh2*<sup>-/-</sup>; *Ezh2*<sup>fl/fl</sup>:*Cγ1-cre* /*Cr2-cre*; *n*=12, grey filled line) GC B cells. **(B)** Frequency of CD19<sup>+</sup>CD95<sup>hi</sup> GC B cells expressing Irf4 in *Ezh2* control (*Ezh2*<sup>+/-</sup>; *Ezh2*<sup>fl/+</sup>:*Cγ1-cre*) and mutant (*Ezh2*<sup>-/-</sup>; *Ezh2*<sup>fl/fl</sup>:*Cγ1-cre*) mice, 12-14 d after NP-CGG immunization measured by flow cytometry. Columns indicate mean values of *n*=9 mice per genotype ± s.d. \**P*=0.01 (*t*-test). Data are representative of 5 experiments.

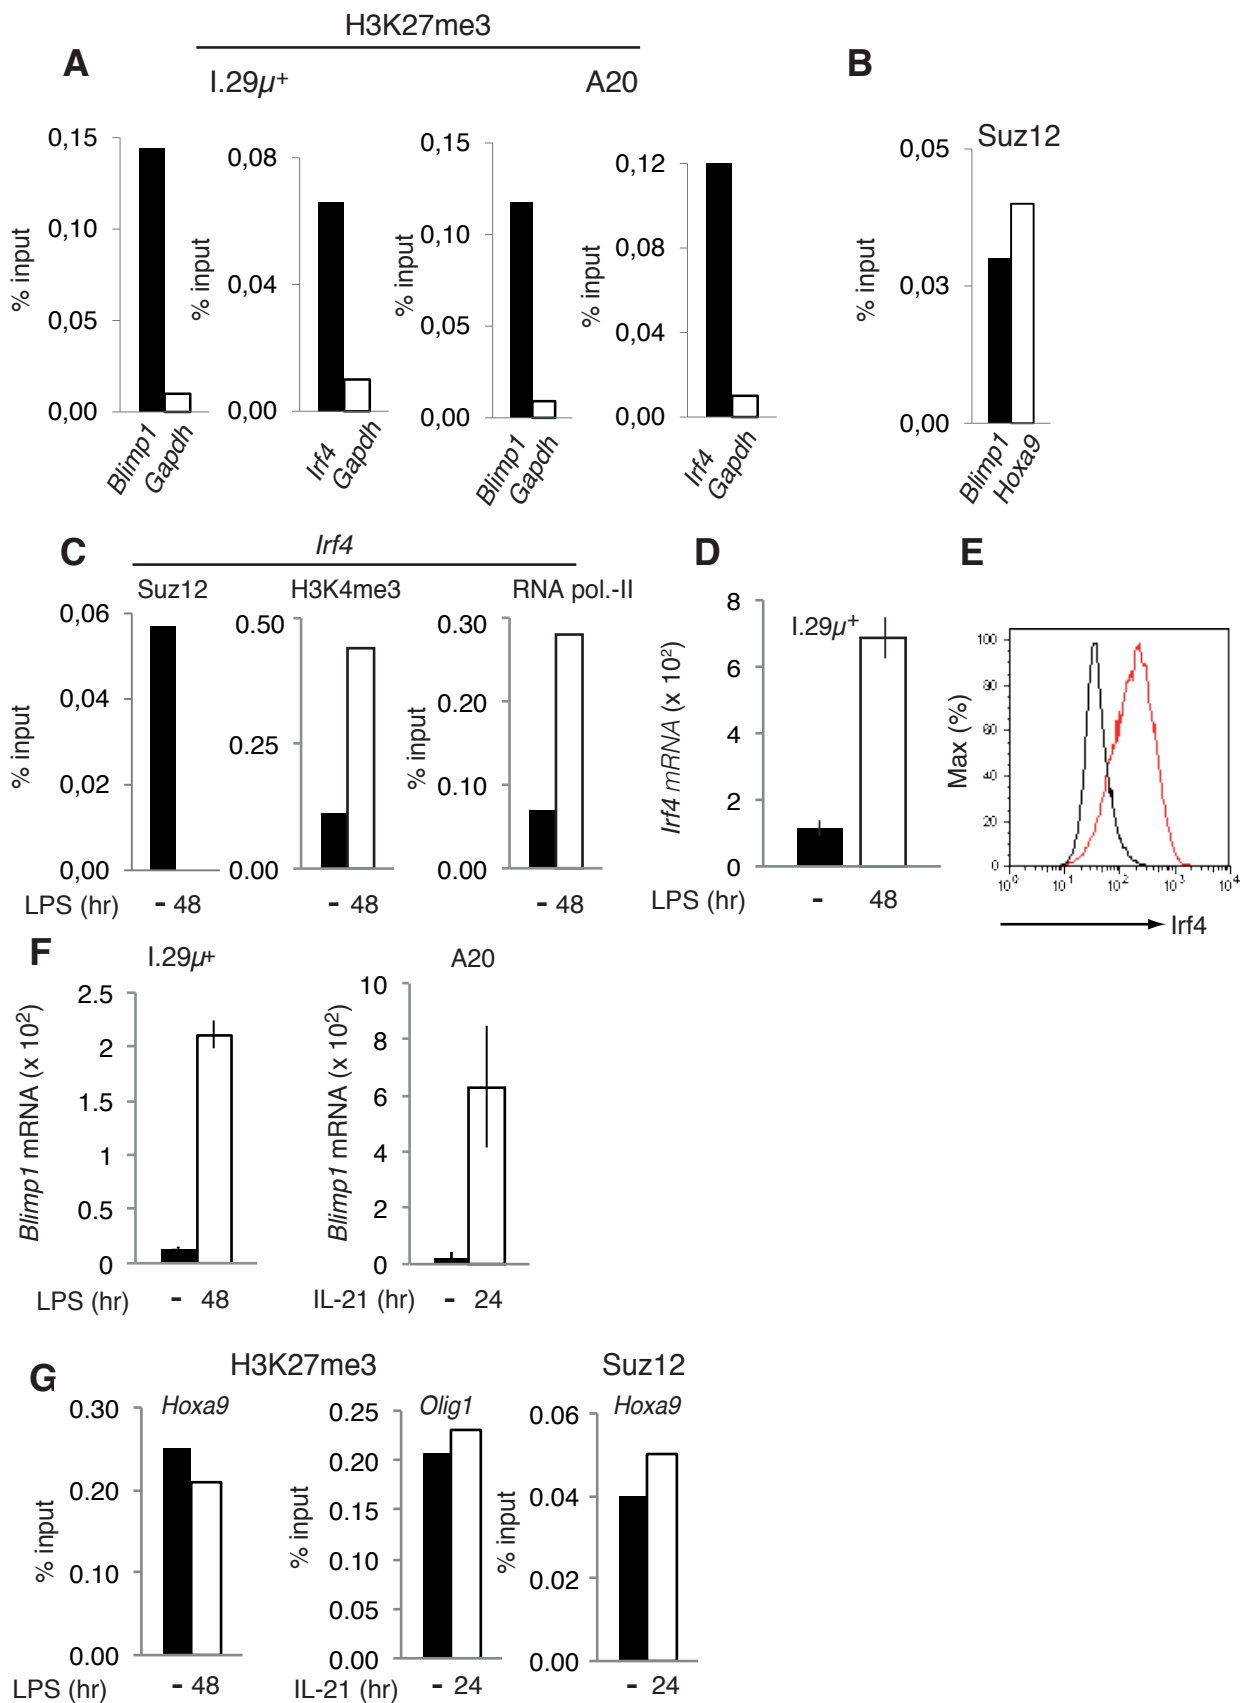

**Supplemental Figure 7.** Induction of *Blimp1* and *Irf4* is associated with H3K27 demethylation and loss of PRC2 recruitment. (A) H3K27me3 ChIP-qPCR for *Blimp1* and *Irf4* in  $1.29\mu^+$  and A20 lymphoma cells. *Gapdh* was included as negative control. Fold enrichment is relative to input and H3 density. (B) Suz12 occupancy at the *Blimp1* and *Hoxa9* loci in A20 cells, assessed by ChIP-qPCR. Values represent fold enrichment over input subtracted for qPCR values obtained performing ChIP with an unrelated IgG. Columns indicate mean. (C) ChIP-qPCR analysis of H3K4me3 deposition and Suz12 and RNA polymerase II occupancy at the *Irf4* locus in  $1.29\mu^+$  B cells before (-) and 48 hr after LPS stimulation. (D) *Irf4* transcripts quantified in  $1.29\mu^+$  B lymphoma cells stimulated with LPS for the indicated time. Columns indicate mean + s.d. of triplicates; values are relative to *Rplp0* expression. (E) FACS analysis of *Irf4* levels in  $1.29\mu^+$  cells before (black) and 48 hr after (red) LPS stimulation. (F) Quantification of *Blimp1* transcripts in lymphoma cells stimulated respectively with LPS ( $1.29\mu^+$ ) and IL-21 (A20) for the indicated hr. Columns indicate mean values + s.d. of PCR triplicates; values are relative to *Rplp0* expression. (G) H3K27me3 ChIP-qPCR for *Hoxa9* before and after LPS stimulation of  $1.29\mu^+$  cells. Columns indicate mean. Also shown, ChIP-qPCR analyses of H3K27me3 density and Suz12 occupancy at *Olig1* and *Hoxa9* in A20 cells, in response to IL-21 stimulation. Columns indicate mean. Data represent 3 (E) and 2 (D) and one (A, B, C, F, G) experiments.

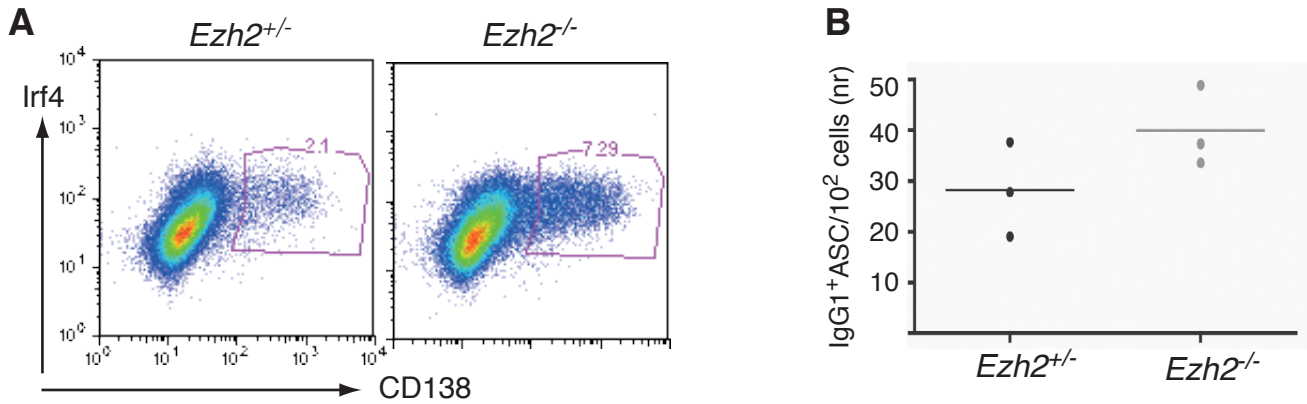

**Supplemental Figure 8.** Ezh2 mutant B cells differentiate more efficiently into antibody-secreting cells in vitro. **(A)** Representative FACS analysis of Irf4 and CD138 expression in *Ezh2* control (*Ezh2*<sup>+/+</sup>; *Ezh2*<sup>fl/+</sup>:*Cγ1-cre*, *n*=6) and mutant (*Ezh2*<sup>-/-</sup>; *Ezh2*<sup>fl/fl</sup>:*Cγ1-cre*, *n*=6) iGB cells 4d after CD40L/BAFF/IL4 stimulation. Numbers indicate percentage of Irf4<sup>hi</sup>CD138<sup>+</sup> plasma blasts. **(B)** Quantification by ELISPOT of IgG1 antibody-secreting cells (ASC) generated in *Ezh2* control (*Ezh2*<sup>+/+</sup>; *Ezh2*<sup>fl/+</sup>:*Cγ1-cre*; *n*=3) and mutant (*Ezh2*<sup>-/-</sup>; *Ezh2*<sup>fl/fl</sup>:*Cγ1-cre*; *n*=3) iGB cultures 2 d after IL-21 stimulation. Data are representative of 2 **(A)** and 1 **(B)** experiments.

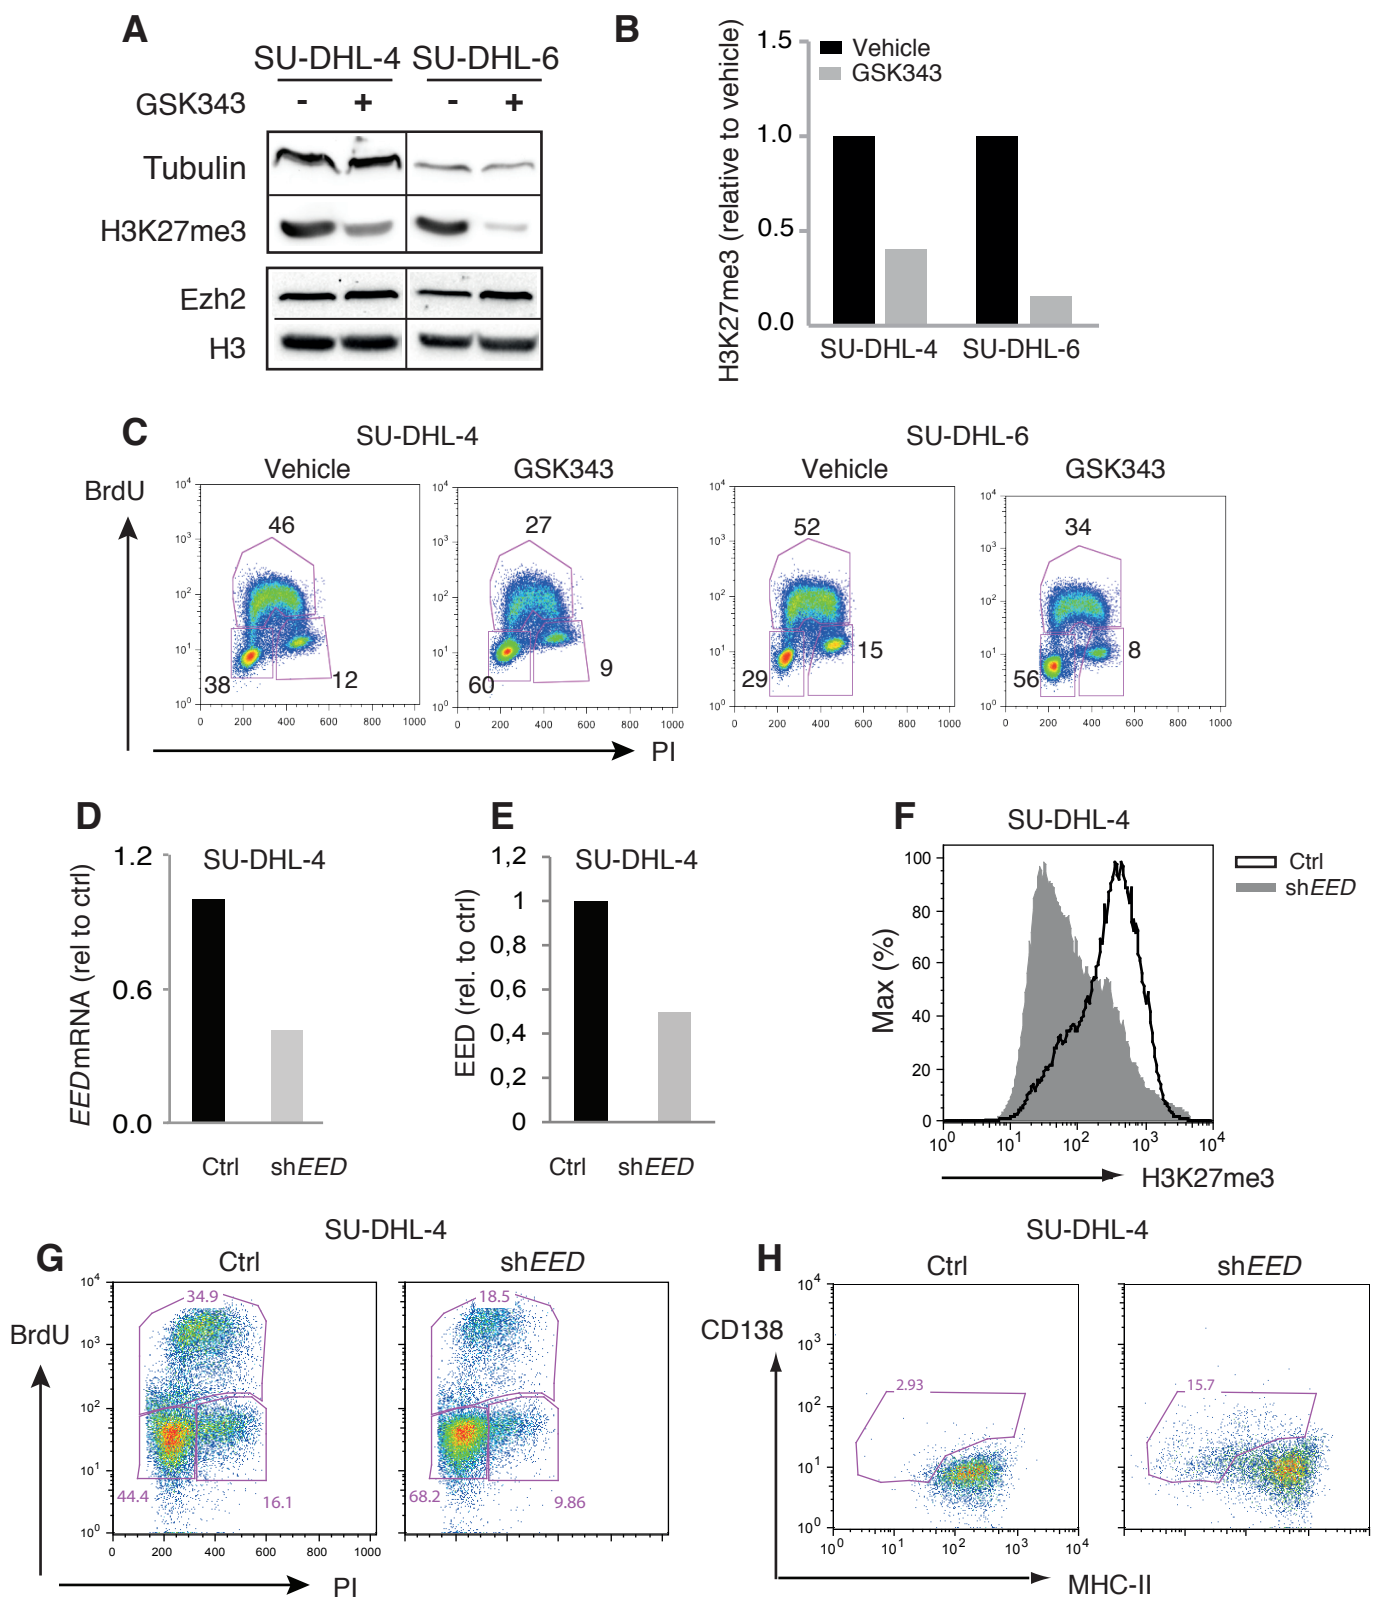

**Supplemental Figure 9.** Effects of Ezh2/PRC2 inactivation on cell-cycle progression and terminal differentiation of DLBCL cells expressing constitutive active EZH2. **(A)** Immunoblotting analysis of H3K27me3 and Ezh2 levels in SU-DHL-4 and SU-DHL-6 DLBCL cells treated with 2.5 $\mu$ M GSK343 (+) or vehicle (-). H3K27me3 and Ezh2 were measured respectively 12 and 2 days after treatment. Tubulin and Histone H3 were analyzed as loading control. **(B)** Quantification of H3K27me3 in control- and GSK343-treated DLBCL cells, as assessed by immunoblotting analysis; represented as relative to H3K27me3 levels in vehicle-treated cells. **(C)** Cell cycle distribution of SU-DHL-4 and SU-DHL-6 cells cultured for 6 d in the presence of 2.5  $\mu$ M GSK343 or vehicle. Numbers indicate percentage of cells in the corresponding gates. **(D)** *Eed* transcripts in SU-DHL-4 cells infected with a lentivirus expressing an *EED*-specific shRNA (sh). Columns indicate mean of 2 independent experiments; values are relative to *HPRT* and *EED* levels in control (ctrl) cells infected with empty virus. **(E)** EED protein levels in SU-DHL-4 cells after EED knock down. Columns represent normalized protein levels calculated on 2 independent EED isoforms; represented as relative to EED levels in control (ctrl)-infected cells. **(F)** Intracellular FACS analysis of H3K27me3 levels before (Ctrl) and after *EED* knock-down in SU-DHL-4 cells. **(G)** Cell cycle distribution of SU-DHL-4 control (ctrl)-infected cells or interfered for 2 d with EED-specific shRNA. **(H)** FACS analysis of control (ctrl)-infected and EED knock down SU-DHL-4 cells. Numbers indicate percentage of lymphoma cells acquiring a plasma cell-like immunophenotype (MHC class-II<sup>+</sup>CD138<sup>+</sup>). Data are representative of 2 experiments.

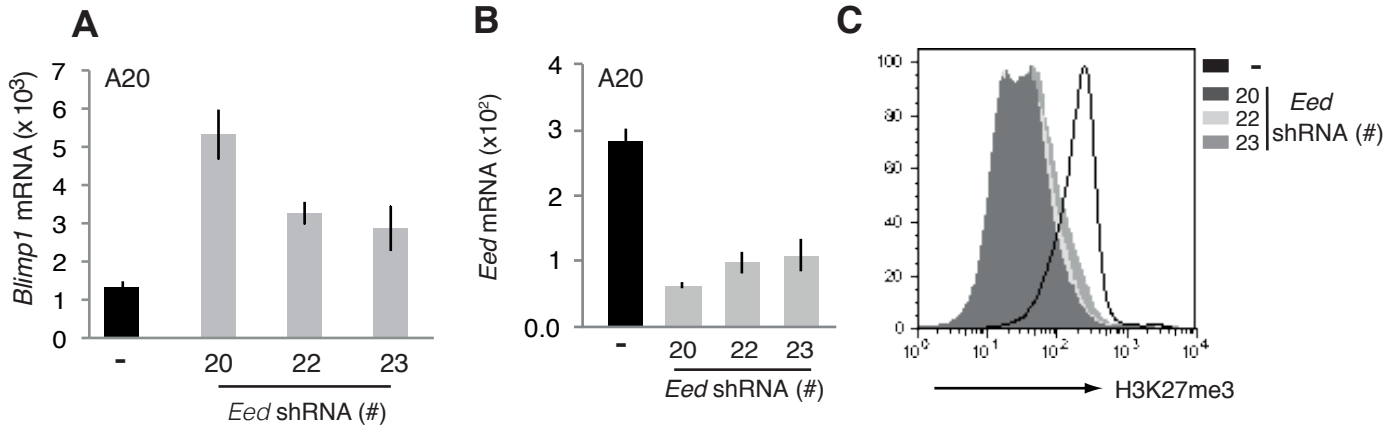

**Supplemental Figure 10.** Inactivation of PRC2 induces tumor suppressor *BLIMP1* in B lymphoma cells expressing wild-type *Ezh2* **(A)** Quantification of *Blimp1* transcripts by qRT-PCR in mouse A20 B lymphoma cells before (-) and after *Eed* knock-down using 3 independent shRNAs (#); columns indicate mean  $\pm$  s.d. of triplicate; results are presented as relative to *Rplp0* expression. **(B)** qRT-PCR analysis of *Eed* transcripts in A20 mouse B lymphoma cells after lentiviral expression of 3 independent shRNAs directed against *Eed*. Column indicates mean  $\pm$  s.d. of triplicates. **(C)** Intracellular FACS analysis determination of H3K27me3 levels in A20 B lymphoma cells before (-) and after *Eed* knock down using three independent shRNAs. Data are representative of 2 experiments.

## Supplemental Table Legends

### Supplemental Table 1. List H3K27me3 and H3K4me3 target genes in GC B cells.

List of genes marked by H3K27me3 ( $P < 1e-10$ ) and H3K4me3 ( $P < 1e-5$ ) in primary GC B cells, within an interval respectively of +/- 5.0 and +/- 2.5 Kb from the TSS. \* H3K27me3 status was determined by ChIP-qPCR.

### Supplemental Table 2. Expression analysis of candidate genes in *Ezh2*<sup>-/-</sup> GC B cells

Fold change expression of candidate genes between sorted *Ezh2* mutant (*Ezh2*<sup>-/-</sup>;  $n=17$ ) and control (*Ezh2*<sup>+/-</sup>;  $n=15$ ) GC B cell samples, assessed by qRT-PCR analysis. Mutant samples were sorted from the spleen of respectively *Ezh2*<sup>fl/fl</sup>:*Cγ1-cre*, *Ezh2*<sup>fl/fl</sup>:*Cr2-cre*, and *Ezh2*<sup>fl/fl</sup>:*Cr2-cre:Aicda*<sup>-/-</sup> mice. Samples included in the analysis showed 70% or greater efficiency of Cre-mediated recombination at the *Ezh2* locus. Statistical analysis of data (Wcox= Wilcoxon rank sum test) and H3K27me3/H3K4me3 status of tested genes, established through bioinformatic analysis of ChIP-seq or ChIP-qPCR (\*) data is included.

### Supplemental Table 3. Expression analysis of BCL6 targets in *Ezh2*<sup>-/-</sup> GC B cells

Fold change expression of mouse orthologues of human BCL-6 target genes (FDR < 0.0001) in *Ezh2* mutant (*Ezh2*<sup>-/-</sup>;  $n \geq 11$ ) versus control (*Ezh2*<sup>+/-</sup>;  $n \geq 10$ ) GC B cell samples. Mutant GC B cell samples were obtained as described in Supplemental Table 1. Statistical analysis of data (Wcox= Wilcoxon rank sum test) and H3K27me3/H3K4me3 status of tested genes, established through bioinformatic analysis of ChIP-seq data or ChIP-qPCR (\*) is included.

### Supplemental Table 4. List of oligonucleotide sequences and Taqman probes

used in the study Information on primer sequence and identification numbers of Taqman probes and short hairpin RNAs used throughout the study.



**Caganova et al.****Supplemental Table 1****GCB cells**

| <b>Gene symbol</b>   | <b>H3K27me3</b> | <b>H3K4me3</b> |
|----------------------|-----------------|----------------|
| <i>0610038B21Rik</i> | +               | +              |
| <i>0610040F04Rik</i> | +               | +              |
| <i>1110001A16Rik</i> | +               | +              |
| <i>1110004F10Rik</i> | +               | +              |
| <i>1110007C09Rik</i> | +               | +              |
| <i>1110008P14Rik</i> | +               | +              |
| <i>1110035M17Rik</i> | +               | +              |
| <i>1110038B12Rik</i> | +               | +              |
| <i>1110038F14Rik</i> | +               | +              |
| <i>1110051M20Rik</i> | +               | +              |
| <i>1110058L19Rik</i> | +               | +              |
| <i>1190002N15Rik</i> | +               | +              |
| <i>1500011K16Rik</i> | +               | +              |
| <i>1500016L03Rik</i> | +               | +              |
| <i>1500032L24Rik</i> | +               | +              |
| <i>1600029O15Rik</i> | +               | +              |
| <i>1700001G17Rik</i> | +               | +              |
| <i>1700003D09Rik</i> | +               | +              |
| <i>1700003E16Rik</i> | +               | +              |
| <i>1700003G18Rik</i> | +               | +              |
| <i>1700003M07Rik</i> | +               | +              |
| <i>1700007K13Rik</i> | +               | +              |
| <i>1700008J07Rik</i> | +               | +              |
| <i>1700008O03Rik</i> | +               | +              |
| <i>1700013G23Rik</i> | +               | +              |
| <i>1700020N18Rik</i> | +               | +              |
| <i>1700023L04Rik</i> | +               | +              |
| <i>1700025E21Rik</i> | +               | +              |
| <i>1700030J22Rik</i> | +               | +              |
| <i>1700037H04Rik</i> | +               | +              |
| <i>1700048O20Rik</i> | +               | +              |
| <i>1700088E04Rik</i> | +               | +              |
| <i>1700101E01Rik</i> | +               | +              |
| <i>1700101I11Rik</i> | +               | +              |
| <i>1700105P06Rik</i> | +               | +              |
| <i>1700113A16Rik</i> | +               | +              |
| <i>1810010H24Rik</i> | +               | +              |
| <i>1810013D10Rik</i> | +               | +              |
| <i>1810043G02Rik</i> | +               | +              |
| <i>1810044D09Rik</i> | +               | +              |
| <i>1810055G02Rik</i> | +               | +              |
| <i>1810062G17Rik</i> | +               | +              |
| <i>2210408F21Rik</i> | +               | +              |
| <i>2210409E12Rik</i> | +               | +              |
| <i>2310001K24Rik</i> | +               | +              |
| <i>2310002J15Rik</i> | +               | +              |
| <i>2310008H04Rik</i> | +               | +              |
| <i>2310034G01Rik</i> | +               | +              |

|               |   |   |
|---------------|---|---|
| 2310044G17Rik | + | + |
| 2310057M21Rik | + | + |
| 2310068J16Rik | + | + |
| 2410004N09Rik | + | + |
| 2410057H14Rik | + | + |
| 2410066E13Rik | + | + |
| 2410089E03Rik | + | + |
| 2510039O18Rik | + | + |
| 2610002M06Rik | + | + |
| 2610008E11Rik | + | + |
| 2610301G19Rik | + | + |
| 2610507B11Rik | + | + |
| 2700046G09Rik | + | + |
| 2700060E02Rik | + | + |
| 2700062C07Rik | + | + |
| 2700081O15Rik | + | + |
| 2700089E24Rik | + | + |
| 2810008D09Rik | + | + |
| 2810029C07Rik | + | + |
| 2810408I11Rik | + | + |
| 2810428I15Rik | + | + |
| 2810454H06Rik | + | + |
| 2810468N07Rik | + | + |
| 2900005J15Rik | + | + |
| 2900076A07Rik | + | + |
| 3110001D03Rik | + | + |
| 3110021A11Rik | + | + |
| 3300005D01Rik | + | + |
| 3830406C13Rik | + | + |
| 4430402I18Rik | + | + |
| 4632415L05Rik | + | + |
| 4632427E13Rik | + | + |
| 4632428C04Rik | + | + |
| 4732415M23Rik | + | + |
| 4732471J01Rik | + | + |
| 4833419F23Rik | + | + |
| 4921530L18Rik | + | + |
| 4922501C03Rik | + | + |
| 4930402H24Rik | + | + |
| 4930404I05Rik | + | + |
| 4930412O13Rik | + | + |
| 4930426D05Rik | + | + |
| 4930429B21Rik | + | + |
| 4930430F08Rik | + | + |
| 4930453N24Rik | + | + |
| 4930455D15Rik | + | + |
| 4930465K10Rik | + | + |
| 4930467K11Rik | + | + |
| 4930471M09Rik | + | + |
| 4930524O08Rik | + | + |
| 4930529M08Rik | + | + |
| 4930558K02Rik | + | + |
| 4930579K19Rik | + | + |

|               |   |   |
|---------------|---|---|
| 4930581F22Rik | + | + |
| 4931440P22Rik | + | + |
| 4933427G17Rik | + | + |
| 4933430I17Rik | + | + |
| 4933436C20Rik | + | + |
| 4933439K11Rik | + | + |
| 5031434O11Rik | + | + |
| 5033411D12Rik | + | + |
| 5430417L22Rik | + | + |
| 5530601H04Rik | + | + |
| 5730409E04Rik | + | + |
| 5730508B09Rik | + | + |
| 5730522E02Rik | + | + |
| 5730559C18Rik | + | + |
| 6430548M08Rik | + | + |
| 6430571L13Rik | + | + |
| 6530402F18Rik | + | + |
| 6720401G13Rik | + | + |
| 6720456H20Rik | + | + |
| 6720483E21Rik | + | + |
| 8030462N17Rik | + | + |
| 9130024F11Rik | + | + |
| 9130206I24Rik | + | + |
| 9330179D12Rik | + | + |
| 9430008C03Rik | + | + |
| 9430038I01Rik | + | + |
| 9430091E24Rik | + | + |
| 9530027J09Rik | + | + |
| 9530052E02Rik | + | + |
| 9530077C05Rik | + | + |
| 9530080O11Rik | + | + |
| 9530082P21Rik | + | + |
| 9930012K11Rik | + | + |
| A230020J21Rik | + | + |
| A230028O05Rik | + | + |
| A230050P20Rik | + | + |
| A230056J06Rik | + | + |
| A330009N23Rik | + | + |
| A330032B11Rik | + | + |
| A330040F15Rik | + | + |
| A430005L14Rik | + | + |
| A4galt        | + | + |
| A730008H23Rik | + | + |
| A930018P22Rik | + | + |
| A930024E05Rik | + | + |
| AA543186      | + | + |
| Aaas          | + | + |
| Aatf          | + | + |
| Abca1         | + | + |
| Abca3         | + | + |
| Abca5         | + | + |
| Abcc5         | + | + |
| Abcd4         | + | + |

|                |   |   |
|----------------|---|---|
| <i>Abhd1</i>   | + | + |
| <i>Abhd10</i>  | + | + |
| <i>Abhd11</i>  | + | + |
| <i>Abhd12</i>  | + | + |
| <i>Abhd15</i>  | + | + |
| <i>Abhd16a</i> | + | + |
| <i>Abhd4</i>   | + | + |
| <i>Abhd6</i>   | + | + |
| <i>Abi2</i>    | + | + |
| <i>Ablim1</i>  | + | + |
| <i>Ablim2</i>  | + | + |
| <i>Abtb2</i>   | + | + |
| <i>Acad8</i>   | + | + |
| <i>Acadsb</i>  | + | + |
| <i>Acadvl</i>  | + | + |
| <i>Acbd4</i>   | + | + |
| <i>Accs</i>    | + | + |
| <i>Acer3</i>   | + | + |
| <i>Acot2</i>   | + | + |
| <i>Acox3</i>   | + | + |
| <i>Acp1</i>    | + | + |
| <i>Acpl2</i>   | + | + |
| <i>Acs15</i>   | + | + |
| <i>Acss2</i>   | + | + |
| <i>Actn3</i>   | + | + |
| <i>Actr10</i>  | + | + |
| <i>Actr5</i>   | + | + |
| <i>Actr6</i>   | + | + |
| <i>Actrt3</i>  | + | + |
| <i>Acvr1b</i>  | + | + |
| <i>Acvr2a</i>  | + | + |
| <i>Acyp2</i>   | + | + |
| <i>Adam15</i>  | + | + |
| <i>Adam19</i>  | + | + |
| <i>Adamts6</i> | + | + |
| <i>Adamts7</i> | + | + |
| <i>Adap2</i>   | + | + |
| <i>Adar</i>    | + | + |
| <i>Adat3</i>   | + | + |
| <i>Adc</i>     | + | + |
| <i>Adck2</i>   | + | + |
| <i>Adck5</i>   | + | + |
| <i>Adcy7</i>   | + | + |
| <i>Adh5</i>    | + | + |
| <i>Adnp2</i>   | + | + |
| <i>Adora2a</i> | + | + |
| <i>Adora2b</i> | + | + |
| <i>Adpgk</i>   | + | + |
| <i>Adprhl2</i> | + | + |
| <i>Adrb2</i>   | + | + |
| <i>Aff1</i>    | + | + |
| <i>Afg3l2</i>  | + | + |
| <i>Agk</i>     | + | + |

|                 |   |   |
|-----------------|---|---|
| <i>Agpat6</i>   | + | + |
| <i>Agpat9</i>   | + | + |
| <i>Agphd1</i>   | + | + |
| <i>Agrn</i>     | + | + |
| <i>Ahcyl1</i>   | + | + |
| <i>Ahcyl2</i>   | + | + |
| <i>Ahdc1</i>    | + | + |
| <i>Ahnak</i>    | + | + |
| <i>Ahr</i>      | + | + |
| <i>Ahsa2</i>    | + | + |
| <i>AI837181</i> | + | + |
| <i>AI846148</i> | + | + |
| <i>Aim1</i>     | + | + |
| <i>Akap1</i>    | + | + |
| <i>Akap7</i>    | + | + |
| <i>Akip1</i>    | + | + |
| <i>Akirin1</i>  | + | + |
| <i>Akirin2</i>  | + | + |
| <i>Akt1</i>     | + | + |
| <i>Alcam</i>    | + | + |
| <i>Aldh1b1</i>  | + | + |
| <i>Aldh3a2</i>  | + | + |
| <i>Aldh4a1</i>  | + | + |
| <i>Aldh5a1</i>  | + | + |
| <i>Aldh6a1</i>  | + | + |
| <i>Alg11</i>    | + | + |
| <i>Alg6</i>     | + | + |
| <i>Alkbh5</i>   | + | + |
| <i>Alms1</i>    | + | + |
| <i>Aloxe3</i>   | + | + |
| <i>Ambra1</i>   | + | + |
| <i>Amd1</i>     | + | + |
| <i>Amd2</i>     | + | + |
| <i>Amdhd1</i>   | + | + |
| <i>Amigo2</i>   | + | + |
| <i>Ammecr1</i>  | + | + |
| <i>Anapc15</i>  | + | + |
| <i>Angel1</i>   | + | + |
| <i>Angel2</i>   | + | + |
| <i>Angptl4</i>  | + | + |
| <i>Ank</i>      | + | + |
| <i>Ankrd13c</i> | + | + |
| <i>Ankrd24</i>  | + | + |
| <i>Ankrd27</i>  | + | + |
| <i>Ankrd33b</i> | + | + |
| <i>Ankrd34a</i> | + | + |
| <i>Ankrd42</i>  | + | + |
| <i>Ankrd50</i>  | + | + |
| <i>Ano10</i>    | + | + |
| <i>Anp32a</i>   | + | + |
| <i>Anxa4</i>    | + | + |
| <i>Anxa5</i>    | + | + |
| <i>Ap1ar</i>    | + | + |

|                 |   |   |
|-----------------|---|---|
| <i>Ap1b1</i>    | + | + |
| <i>Ap1g1</i>    | + | + |
| <i>Ap1g2</i>    | + | + |
| <i>Ap1s1</i>    | + | + |
| <i>Ap1s3</i>    | + | + |
| <i>Ap2a1</i>    | + | + |
| <i>Ap3m2</i>    | + | + |
| <i>Ap3s1</i>    | + | + |
| <i>Ap4e1</i>    | + | + |
| <i>Ap5b1</i>    | + | + |
| <i>Apba1</i>    | + | + |
| <i>Apbb1</i>    | + | + |
| <i>Apbb2</i>    | + | + |
| <i>Aph1b</i>    | + | + |
| <i>Aph1c</i>    | + | + |
| <i>Aplp2</i>    | + | + |
| <i>Apoa1bp</i>  | + | + |
| <i>Apold1</i>   | + | + |
| <i>Apoo</i>     | + | + |
| <i>Apoo-ps</i>  | + | + |
| <i>App</i>      | + | + |
| <i>Appl1</i>    | + | + |
| <i>Aqp11</i>    | + | + |
| <i>Arf2</i>     | + | + |
| <i>Arf3</i>     | + | + |
| <i>Arfgap2</i>  | + | + |
| <i>Arfip1</i>   | + | + |
| <i>Arhgap10</i> | + | + |
| <i>Arhgap17</i> | + | + |
| <i>Arhgap21</i> | + | + |
| <i>Arhgap26</i> | + | + |
| <i>Arhgap31</i> | + | + |
| <i>Arhgap39</i> | + | + |
| <i>Arhgap6</i>  | + | + |
| <i>Arhgap8</i>  | + | + |
| <i>Arhgdig</i>  | + | + |
| <i>Arhgef11</i> | + | + |
| <i>Arhgef12</i> | + | + |
| <i>Arhgef17</i> | + | + |
| <i>Arhgef25</i> | + | + |
| <i>Arhgef39</i> | + | + |
| <i>Arhgef7</i>  | + | + |
| <i>Arhgef9</i>  | + | + |
| <i>Arid3a</i>   | + | + |
| <i>Arid5a</i>   | + | + |
| <i>Arih1</i>    | + | + |
| <i>Arih2</i>    | + | + |
| <i>Arl1</i>     | + | + |
| <i>Arl10</i>    | + | + |
| <i>Arl13b</i>   | + | + |
| <i>Arl4c</i>    | + | + |
| <i>Arl6</i>     | + | + |
| <i>Armc10</i>   | + | + |

|                 |   |   |
|-----------------|---|---|
| <i>Armc8</i>    | + | + |
| <i>Armcx2</i>   | + | + |
| <i>Arntl</i>    | + | + |
| <i>Arpc5</i>    | + | + |
| <i>Arrb1</i>    | + | + |
| <i>Arrdc1</i>   | + | + |
| <i>Arsa</i>     | + | + |
| <i>Arvcf</i>    | + | + |
| <i>Asap1</i>    | + | + |
| <i>Asb13</i>    | + | + |
| <i>Asb4</i>     | + | + |
| <i>Asb8</i>     | + | + |
| <i>Ascc2</i>    | + | + |
| <i>Ascc3</i>    | + | + |
| <i>Ascl4</i>    | + | + |
| <i>Asl</i>      | + | + |
| <i>Asns</i>     | + | + |
| <i>Aspscr1</i>  | + | + |
| <i>Aste1</i>    | + | + |
| <i>Atad2b</i>   | + | + |
| <i>Atf3</i>     | + | + |
| <i>Atf6</i>     | + | + |
| <i>Atf6b</i>    | + | + |
| <i>Atf7ip2</i>  | + | + |
| <i>Atg12</i>    | + | + |
| <i>Atg14</i>    | + | + |
| <i>Atg16l1</i>  | + | + |
| <i>Atg4c</i>    | + | + |
| <i>Atg7</i>     | + | + |
| <i>Ath11</i>    | + | + |
| <i>Atl2</i>     | + | + |
| <i>Atp10a</i>   | + | + |
| <i>Atp11c</i>   | + | + |
| <i>Atp1a1</i>   | + | + |
| <i>Atp1b2</i>   | + | + |
| <i>Atp2b1</i>   | + | + |
| <i>Atp2c1</i>   | + | + |
| <i>Atp5d</i>    | + | + |
| <i>Atp5g1</i>   | + | + |
| <i>Atp5g2</i>   | + | + |
| <i>Atp5g3</i>   | + | + |
| <i>Atp6v0a1</i> | + | + |
| <i>Atp6v0b</i>  | + | + |
| <i>Atp6v0e</i>  | + | + |
| <i>Atp6v1b2</i> | + | + |
| <i>Atp6v1c1</i> | + | + |
| <i>Atp6v1e1</i> | + | + |
| <i>Atp7b</i>    | + | + |
| <i>Atrnl1</i>   | + | + |
| <i>Atxn1</i>    | + | + |
| <i>Atxn7</i>    | + | + |
| <i>Atxn7l2</i>  | + | + |
| <i>AU022252</i> | + | + |

|                  |   |   |
|------------------|---|---|
| <i>AU023871</i>  | + | + |
| <i>AV039307</i>  | + | + |
| <i>Aven</i>      | + | + |
| <i>Avl9</i>      | + | + |
| <i>AW011738</i>  | + | + |
| <i>AY074887</i>  | + | + |
| <i>B3gatl</i>    | + | + |
| <i>B3gat2</i>    | + | + |
| <i>B3gnt1</i>    | + | + |
| <i>B3gnt5</i>    | + | + |
| <i>B3gnt7</i>    | + | + |
| <i>B9d2</i>      | + | + |
| <i>Bach1</i>     | + | + |
| <i>Bag3</i>      | + | + |
| <i>Bahd1</i>     | + | + |
| <i>Baiap2</i>    | + | + |
| <i>Baiap2l1</i>  | + | + |
| <i>Bambi-ps1</i> | + | + |
| <i>BB283400</i>  | + | + |
| <i>Bbc3</i>      | + | + |
| <i>Bbs2</i>      | + | + |
| <i>Bbs5</i>      | + | + |
| <i>Bbx</i>       | + | + |
| <i>BC005561</i>  | + | + |
| <i>BC016423</i>  | + | + |
| <i>BC017158</i>  | + | + |
| <i>BC030867</i>  | + | + |
| <i>BC037032</i>  | + | + |
| <i>BC049762</i>  | + | + |
| <i>BC068281</i>  | + | + |
| <i>Bcar1</i>     | + | + |
| <i>Bcdin3d</i>   | + | + |
| <i>Bckdk</i>     | + | + |
| <i>Bcl11a</i>    | + | + |
| <i>Bcl2</i>      | + | + |
| <i>Bcl2l11</i>   | + | + |
| <i>Bcl2l13</i>   | + | + |
| <i>Bcl7c</i>     | + | + |
| <i>Bco2</i>      | + | + |
| <i>Bcor</i>      | + | + |
| <i>Bcr</i>       | + | + |
| <i>Bdh1</i>      | + | + |
| <i>Bdp1</i>      | + | + |
| <i>Becn1</i>     | + | + |
| <i>Bend3</i>     | + | + |
| <i>Bhlhe40</i>   | + | + |
| <i>Bhlhe41</i>   | + | + |
| <i>Bicd1</i>     | + | + |
| <i>Bik</i>       | + | + |
| <i>Bivm</i>      | + | + |
| <i>Blcap</i>     | + | + |
| <i>Blm</i>       | + | + |
| <i>Blmh</i>      | + | + |



|                      |   |   |
|----------------------|---|---|
| <i>Bloc1s1</i>       | + | + |
| <i>Bloc1s2a</i>      | + | + |
| <i>Bloc1s6</i>       | + | + |
| <i>Blvrb</i>         | + | + |
| <i>Bmi1</i>          | + | + |
| <i>Bmp1</i>          | + | + |
| <i>Bmp8a</i>         | + | + |
| <i>Bmpr1a</i>        | + | + |
| <i>Bmpr2</i>         | + | + |
| <i>Bnip2</i>         | + | + |
| <i>Bnip3l</i>        | + | + |
| <i>Bpgm</i>          | + | + |
| <i>Brms1</i>         | + | + |
| <i>Btbd7</i>         | + | + |
| <i>Btbd8</i>         | + | + |
| <i>Btn1a1</i>        | + | + |
| <i>Btrc</i>          | + | + |
| <i>Bub1</i>          | + | + |
| <i>Bub3</i>          | + | + |
| <i>C030006K11Rik</i> | + | + |
| <i>C030034I22Rik</i> | + | + |
| <i>C030039L03Rik</i> | + | + |
| <i>C2cd2</i>         | + | + |
| <i>C2cd5</i>         | + | + |
| <i>C430049B03Rik</i> | + | + |
| <i>C630043F03Rik</i> | + | + |
| <i>C87198</i>        | + | + |
| <i>Cab39</i>         | + | + |
| <i>Cables2</i>       | + | + |
| <i>Cabp1</i>         | + | + |
| <i>Cacna1f</i>       | + | + |
| <i>Cacna1h</i>       | + | + |
| <i>Cacnb1</i>        | + | + |
| <i>Calm1</i>         | + | + |
| <i>Calm2</i>         | + | + |
| <i>Calu</i>          | + | + |
| <i>Camk2n2</i>       | + | + |
| <i>Camkk1</i>        | + | + |
| <i>Camsap1</i>       | + | + |
| <i>Camsap2</i>       | + | + |
| <i>Camta1</i>        | + | + |
| <i>Camta2</i>        | + | + |
| <i>Capn7</i>         | + | + |
| <i>Caprin2</i>       | + | + |
| <i>Car2</i>          | + | + |
| <i>Car9</i>          | + | + |
| <i>Carf</i>          | + | + |
| <i>Carhsp1</i>       | + | + |
| <i>Carkd</i>         | + | + |
| <i>Casc1</i>         | + | + |
| <i>Casc4</i>         | + | + |
| <i>Cask</i>          | + | + |
| <i>Casp2</i>         | + | + |

|                 |   |   |
|-----------------|---|---|
| <i>Casp7</i>    | + | + |
| <i>Cblb</i>     | + | + |
| <i>Cbl11</i>    | + | + |
| <i>Cbln3</i>    | + | + |
| <i>Cbr1</i>     | + | + |
| <i>Cbs</i>      | + | + |
| <i>Cbx1</i>     | + | + |
| <i>Cbx2</i>     | + | + |
| <i>Cbx4</i>     | + | + |
| <i>Cbx6</i>     | + | + |
| <i>Cbx7</i>     | + | + |
| <i>Cbx8</i>     | + | + |
| <i>Ccbl2</i>    | + | + |
| <i>Ccdc102a</i> | + | + |
| <i>Ccdc103</i>  | + | + |
| <i>Ccdc109b</i> | + | + |
| <i>Ccdc112</i>  | + | + |
| <i>Ccdc126</i>  | + | + |
| <i>Ccdc132</i>  | + | + |
| <i>Ccdc142</i>  | + | + |
| <i>Ccdc147</i>  | + | + |
| <i>Ccdc148</i>  | + | + |
| <i>Ccdc15</i>   | + | + |
| <i>Ccdc151</i>  | + | + |
| <i>Ccdc159</i>  | + | + |
| <i>Ccdc166</i>  | + | + |
| <i>Ccdc174</i>  | + | + |
| <i>Ccdc22</i>   | + | + |
| <i>Ccdc23</i>   | + | + |
| <i>Ccdc30</i>   | + | + |
| <i>Ccdc32</i>   | + | + |
| <i>Ccdc34</i>   | + | + |
| <i>Ccdc38</i>   | + | + |
| <i>Ccdc55</i>   | + | + |
| <i>Ccdc61</i>   | + | + |
| <i>Ccdc85c</i>  | + | + |
| <i>Ccdc86</i>   | + | + |
| <i>Ccdc87</i>   | + | + |
| <i>Ccdc88a</i>  | + | + |
| <i>Ccdc92</i>   | + | + |
| <i>Ccdc96</i>   | + | + |
| <i>Ccl9</i>     | + | + |
| <i>Ccna2</i>    | + | + |
| <i>Ccnd1</i>    | + | + |
| <i>Ccnd2</i>    | + | + |
| <i>Ccnf</i>     | + | + |
| <i>Ccng1</i>    | + | + |
| <i>Ccnj</i>     | + | + |
| <i>Ccnyl1</i>   | + | + |
| <i>Ccp110</i>   | + | + |
| <i>Ccpg1</i>    | + | + |
| <i>Ccrn4l</i>   | + | + |
| <i>Ccs</i>      | + | + |

|                 |   |   |
|-----------------|---|---|
| <i>Ccsap</i>    | + | + |
| <i>Cct6b</i>    | + | + |
| <i>Cd151</i>    | + | + |
| <i>Cd1d1</i>    | + | + |
| <i>Cd3eap</i>   | + | + |
| <i>Cd59b</i>    | + | + |
| <i>Cd9</i>      | + | + |
| <i>Cdadc1</i>   | + | + |
| <i>Cdc14b</i>   | + | + |
| <i>Cdc20</i>    | + | + |
| <i>Cdc37</i>    | + | + |
| <i>Cdc37l1</i>  | + | + |
| <i>Cdc40</i>    | + | + |
| <i>Cdc42bpb</i> | + | + |
| <i>Cdc42ep2</i> | + | + |
| <i>Cdc42ep3</i> | + | + |
| <i>Cdc42ep4</i> | + | + |
| <i>Cdc5l</i>    | + | + |
| <i>Cdc73</i>    | + | + |
| <i>Cdca7l</i>   | + | + |
| <i>Cdk4</i>     | + | + |
| <i>Cdk5rap2</i> | + | + |
| <i>Cdkl2</i>    | + | + |
| <i>Cdkl5</i>    | + | + |
| <i>Cdkn1a</i>   | + | + |
| <i>Cdkn1b</i>   | + | + |
| <i>Cdkn2a</i>   | + | + |
| <i>Cdkn2b</i>   | + | + |
| <i>Cdpf1</i>    | + | + |
| <i>Cdr2</i>     | + | + |
| <i>Cdyl</i>     | + | + |
| <i>Cdyl2</i>    | + | + |
| <i>Cebpd</i>    | + | + |
| <i>Cecr5</i>    | + | + |
| <i>Celf1</i>    | + | + |
| <i>Cenpf</i>    | + | + |
| <i>Cenpv</i>    | + | + |
| <i>Cep120</i>   | + | + |
| <i>Cep128</i>   | + | + |
| <i>Cep250</i>   | + | + |
| <i>Cep350</i>   | + | + |
| <i>Cep55</i>    | + | + |
| <i>Cep70</i>    | + | + |
| <i>Cep72</i>    | + | + |
| <i>Cep85</i>    | + | + |
| <i>Cep85l</i>   | + | + |
| <i>Cers6</i>    | + | + |
| <i>Cgn</i>      | + | + |
| <i>Cgrrf1</i>   | + | + |
| <i>Ch25h</i>    | + | + |
| <i>Chac1</i>    | + | + |
| <i>Chchd10</i>  | + | + |
| <i>Chchd3</i>   | + | + |

|                |   |   |
|----------------|---|---|
| <i>Chchd7</i>  | + | + |
| <i>Chd1</i>    | + | + |
| <i>Chd7</i>    | + | + |
| <i>Chic1</i>   | + | + |
| <i>Chid1</i>   | + | + |
| <i>Chm</i>     | + | + |
| <i>Chmp1a</i>  | + | + |
| <i>Chmp1b</i>  | + | + |
| <i>Chmp3</i>   | + | + |
| <i>Chmp6</i>   | + | + |
| <i>Chmp7</i>   | + | + |
| <i>Chpf</i>    | + | + |
| <i>Chrm4</i>   | + | + |
| <i>Chrn1</i>   | + | + |
| <i>Chst11</i>  | + | + |
| <i>Chst7</i>   | + | + |
| <i>Chtop</i>   | + | + |
| <i>Churc1</i>  | + | + |
| <i>Cish</i>    | + | + |
| <i>Cited4</i>  | + | + |
| <i>Ciz1</i>    | + | + |
| <i>Ckap2</i>   | + | + |
| <i>Ckap2l</i>  | + | + |
| <i>Ckb</i>     | + | + |
| <i>Clcf1</i>   | + | + |
| <i>Clcn2</i>   | + | + |
| <i>Clcn4-2</i> | + | + |
| <i>Cldn10</i>  | + | + |
| <i>Cldn12</i>  | + | + |
| <i>Cldn23</i>  | + | + |
| <i>Clic4</i>   | + | + |
| <i>Clint1</i>  | + | + |
| <i>Clip1</i>   | + | + |
| <i>Clk2</i>    | + | + |
| <i>Clk4</i>    | + | + |
| <i>Clock</i>   | + | + |
| <i>Clp1</i>    | + | + |
| <i>Cmas</i>    | + | + |
| <i>Cmtm8</i>   | + | + |
| <i>Cnbp</i>    | + | + |
| <i>Cnep1r1</i> | + | + |
| <i>Cnksr3</i>  | + | + |
| <i>Cnn2</i>    | + | + |
| <i>Cnnm2</i>   | + | + |
| <i>Cnot10</i>  | + | + |
| <i>Cnot11</i>  | + | + |
| <i>Cnrip1</i>  | + | + |
| <i>Cntd1</i>   | + | + |
| <i>Cntrob</i>  | + | + |
| <i>Coa3</i>    | + | + |
| <i>Coasy</i>   | + | + |
| <i>Cog6</i>    | + | + |
| <i>Cog7</i>    | + | + |

|                   |   |   |
|-------------------|---|---|
| <i>Coil</i>       | + | + |
| <i>Col23a1</i>    | + | + |
| <i>Col27a1</i>    | + | + |
| <i>Commd3</i>     | + | + |
| <i>Commd7</i>     | + | + |
| <i>Copb2</i>      | + | + |
| <i>Copg1</i>      | + | + |
| <i>Cops4</i>      | + | + |
| <i>Copz1</i>      | + | + |
| <i>Coro6</i>      | + | + |
| <i>Cotl1</i>      | + | + |
| <i>Cox17</i>      | + | + |
| <i>Cox6a1</i>     | + | + |
| <i>Cox6b1</i>     | + | + |
| <i>Cox7b</i>      | + | + |
| <i>Cpeb2</i>      | + | + |
| <i>Cpeb3</i>      | + | + |
| <i>Cpeb4</i>      | + | + |
| <i>Cped1</i>      | + | + |
| <i>Cpm</i>        | + | + |
| <i>Cpne3</i>      | + | + |
| <i>Cpped1</i>     | + | + |
| <i>Cpsf6</i>      | + | + |
| <i>Cpt2</i>       | + | + |
| <i>Crb3</i>       | + | + |
| <i>Crcp</i>       | + | + |
| <i>Creb3l2</i>    | + | + |
| <i>Crebbp</i>     | + | + |
| <i>Crebrf</i>     | + | + |
| <i>Crebzf</i>     | + | + |
| <i>Creg1</i>      | + | + |
| <i>Creg2</i>      | + | + |
| <i>Creld1</i>     | + | + |
| <i>Crip2</i>      | + | + |
| <i>Crnkl1</i>     | + | + |
| <i>Cry1</i>       | + | + |
| <i>Cry2</i>       | + | + |
| <i>Cryz1l</i>     | + | + |
| <i>Csda</i>       | + | + |
| <i>Csf1</i>       | + | + |
| <i>Csgalnact2</i> | + | + |
| <i>Csnk1a1</i>    | + | + |
| <i>Csrp2</i>      | + | + |
| <i>Cstad</i>      | + | + |
| <i>Cstf2t</i>     | + | + |
| <i>Ctdsp1</i>     | + | + |
| <i>Ctnna1</i>     | + | + |
| <i>Ctnnb1</i>     | + | + |
| <i>Ctr9</i>       | + | + |
| <i>Ctsb</i>       | + | + |
| <i>Ctsc</i>       | + | + |
| <i>Ctse</i>       | + | + |
| <i>Ctsl</i>       | + | + |

|                     |   |   |
|---------------------|---|---|
| <i>Cttnbp2nl</i>    | + | + |
| <i>Cuedc2</i>       | + | + |
| <i>Cul2</i>         | + | + |
| <i>Cuta</i>         | + | + |
| <i>Cux1</i>         | + | + |
| <i>Cwf19l2</i>      | + | + |
| <i>Cxadr</i>        | + | + |
| <i>Cyb5b</i>        | + | + |
| <i>Cyb5r4</i>       | + | + |
| <i>Cyfp1</i>        | + | + |
| <i>Cyhr1</i>        | + | + |
| <i>Cyp27a1</i>      | + | + |
| <i>Cyp39a1</i>      | + | + |
| <i>Cyp4f17</i>      | + | + |
| <i>Cystm1</i>       | + | + |
| <i>Cyth3</i>        | + | + |
| <i>Cytip</i>        | + | + |
| <i>D10Wsu52e</i>    | + | + |
| <i>D17H6S53E</i>    | + | + |
| <i>D19Erttd737e</i> | + | + |
| <i>D3Erttd254e</i>  | + | + |
| <i>Daam1</i>        | + | + |
| <i>Dad1</i>         | + | + |
| <i>Daglb</i>        | + | + |
| <i>Dars</i>         | + | + |
| <i>Dazl</i>         | + | + |
| <i>Dbp</i>          | + | + |
| <i>Dbr1</i>         | + | + |
| <i>Dcaf10</i>       | + | + |
| <i>Dcaf4</i>        | + | + |
| <i>Dcaf5</i>        | + | + |
| <i>Dcbld1</i>       | + | + |
| <i>Dcbld2</i>       | + | + |
| <i>Dctn1</i>        | + | + |
| <i>Dctn2</i>        | + | + |
| <i>Dctn3</i>        | + | + |
| <i>Dcun1d4</i>      | + | + |
| <i>Dcxr</i>         | + | + |
| <i>Ddhd1</i>        | + | + |
| <i>Ddi2</i>         | + | + |
| <i>Ddx1</i>         | + | + |
| <i>Ddx10</i>        | + | + |
| <i>Ddx17</i>        | + | + |
| <i>Ddx20</i>        | + | + |
| <i>Ddx23</i>        | + | + |
| <i>Ddx25</i>        | + | + |
| <i>Ddx27</i>        | + | + |
| <i>Ddx50</i>        | + | + |
| <i>Ddx52</i>        | + | + |
| <i>Deb1</i>         | + | + |
| <i>Decr1</i>        | + | + |
| <i>Dennd2d</i>      | + | + |
| <i>Dennd4c</i>      | + | + |

|                |   |   |
|----------------|---|---|
| <i>Dennd5a</i> | + | + |
| <i>Depdc1a</i> | + | + |
| <i>Depdc1b</i> | + | + |
| <i>Deptor</i>  | + | + |
| <i>Dffa</i>    | + | + |
| <i>Dgat1</i>   | + | + |
| <i>Dgcr14</i>  | + | + |
| <i>Dgkq</i>    | + | + |
| <i>Dgkz</i>    | + | + |
| <i>Dhx32</i>   | + | + |
| <i>Dicer1</i>  | + | + |
| <i>Dip2a</i>   | + | + |
| <i>Dip2b</i>   | + | + |
| <i>Dirc2</i>   | + | + |
| <i>Disc1</i>   | + | + |
| <i>Dkk1</i>    | + | + |
| <i>Dlat</i>    | + | + |
| <i>Dlec1</i>   | + | + |
| <i>Dleu2</i>   | + | + |
| <i>Dlg1</i>    | + | + |
| <i>Dlgap4</i>  | + | + |
| <i>Dll1</i>    | + | + |
| <i>Dlx1</i>    | + | + |
| <i>Dmtf1</i>   | + | + |
| <i>Dmwd</i>    | + | + |
| <i>Dmxl1</i>   | + | + |
| <i>Dnaaf1</i>  | + | + |
| <i>Dnaic1</i>  | + | + |
| <i>Dnajb12</i> | + | + |
| <i>Dnajb2</i>  | + | + |
| <i>Dnajb4</i>  | + | + |
| <i>Dnajc1</i>  | + | + |
| <i>Dnajc10</i> | + | + |
| <i>Dnajc14</i> | + | + |
| <i>Dnajc24</i> | + | + |
| <i>Dnajc27</i> | + | + |
| <i>Dnajc28</i> | + | + |
| <i>Dnmbp</i>   | + | + |
| <i>Dnmt3a</i>  | + | + |
| <i>Dnttip1</i> | + | + |
| <i>Dock10</i>  | + | + |
| <i>Dock4</i>   | + | + |
| <i>Dopey1</i>  | + | + |
| <i>Dopey2</i>  | + | + |
| <i>Dpf3</i>    | + | + |
| <i>Dph1</i>    | + | + |
| <i>Dpm3</i>    | + | + |
| <i>Dpp4</i>    | + | + |
| <i>Dpy19l4</i> | + | + |
| <i>Dpysl5</i>  | + | + |
| <i>Dram1</i>   | + | + |
| <i>Drap1</i>   | + | + |
| <i>Drg1</i>    | + | + |

|                      |   |   |
|----------------------|---|---|
| <i>Dscc1</i>         | + | + |
| <i>Dst</i>           | + | + |
| <i>Dstn</i>          | + | + |
| <i>Dtwd1</i>         | + | + |
| <i>Dtx4</i>          | + | + |
| <i>Dus1l</i>         | + | + |
| <i>Dusp19</i>        | + | + |
| <i>Dusp4</i>         | + | + |
| <i>Dusp5</i>         | + | + |
| <i>Dusp8</i>         | + | + |
| <i>Dync1i2</i>       | + | + |
| <i>Dyrk1a</i>        | + | + |
| <i>Dyrk2</i>         | + | + |
| <i>Dzank1</i>        | + | + |
| <i>E030030I06Rik</i> | + | + |
| <i>E130102H24Rik</i> | + | + |
| <i>E130218I03Rik</i> | + | + |
| <i>E230016M11Rik</i> | + | + |
| <i>E2f5</i>          | + | + |
| <i>E2f6</i>          | + | + |
| <i>E2f7</i>          | + | + |
| <i>E2f8</i>          | + | + |
| <i>E330009J07Rik</i> | + | + |
| <i>E430018J23Rik</i> | + | + |
| <i>Eapp</i>          | + | + |
| <i>Ece2</i>          | + | + |
| <i>Eda</i>           | + | + |
| <i>Edaradd</i>       | + | + |
| <i>Edem2</i>         | + | + |
| <i>Edn1</i>          | + | + |
| <i>Eef1a1</i>        | + | + |
| <i>Eef2k</i>         | + | + |
| <i>Eefsec</i>        | + | + |
| <i>Efcab14</i>       | + | + |
| <i>Efha2</i>         | + | + |
| <i>Efhc1</i>         | + | + |
| <i>Efhd2</i>         | + | + |
| <i>Efna1</i>         | + | + |
| <i>Efnb2</i>         | + | + |
| <i>Efr3a</i>         | + | + |
| <i>Eftud2</i>        | + | + |
| <i>Egln1</i>         | + | + |
| <i>Egr2</i>          | + | + |
| <i>Ehbp1</i>         | + | + |
| <i>Ehd3</i>          | + | + |
| <i>Eid2b</i>         | + | + |
| <i>Eif2ak4</i>       | + | + |
| <i>Eif2c4</i>        | + | + |
| <i>Eif2s2</i>        | + | + |
| <i>Eif3a</i>         | + | + |
| <i>Eif3l</i>         | + | + |
| <i>Eif4a3</i>        | + | + |
| <i>Eif4b</i>         | + | + |



|                  |   |   |
|------------------|---|---|
| <i>Eif4e3</i>    | + | + |
| <i>Eif4ebp1</i>  | + | + |
| <i>Eif4ebp2</i>  | + | + |
| <i>Eif4enif1</i> | + | + |
| <i>Ell2</i>      | + | + |
| <i>Elmo1</i>     | + | + |
| <i>Elmod2</i>    | + | + |
| <i>Elovl7</i>    | + | + |
| <i>Elp3</i>      | + | + |
| <i>Emb</i>       | + | + |
| <i>Emc4</i>      | + | + |
| <i>Emc6</i>      | + | + |
| <i>Eml2</i>      | + | + |
| <i>Eml5</i>      | + | + |
| <i>Eml6</i>      | + | + |
| <i>Enc1</i>      | + | + |
| <i>Engase</i>    | + | + |
| <i>Enkur</i>     | + | + |
| <i>Enox2</i>     | + | + |
| <i>Entpd1</i>    | + | + |
| <i>Entpd4</i>    | + | + |
| <i>Entpd6</i>    | + | + |
| <i>Epas1</i>     | + | + |
| <i>Epb4.1l2</i>  | + | + |
| <i>Epb4.1l5</i>  | + | + |
| <i>Epc2</i>      | + | + |
| <i>Epcam</i>     | + | + |
| <i>Epg5</i>      | + | + |
| <i>Epm2a</i>     | + | + |
| <i>Epn2</i>      | + | + |
| <i>Eral1</i>     | + | + |
| <i>Erb2ip</i>    | + | + |
| <i>Erb3</i>      | + | + |
| <i>Erc1</i>      | + | + |
| <i>Erc1</i>      | + | + |
| <i>Erf</i>       | + | + |
| <i>Erich1</i>    | + | + |
| <i>Erlin2</i>    | + | + |
| <i>Ern1</i>      | + | + |
| <i>Ero1l</i>     | + | + |
| <i>Erp29</i>     | + | + |
| <i>Esd</i>       | + | + |
| <i>Espn</i>      | + | + |
| <i>Esr2</i>      | + | + |
| <i>Esrra</i>     | + | + |
| <i>Esyt2</i>     | + | + |
| <i>Etfa</i>      | + | + |
| <i>Etfb</i>      | + | + |
| <i>Etnk1</i>     | + | + |
| <i>Etv4</i>      | + | + |
| <i>Etv5</i>      | + | + |
| <i>Evc</i>       | + | + |
| <i>Evc2</i>      | + | + |

|                 |   |   |
|-----------------|---|---|
| <i>Evi</i>      | + | + |
| <i>Exoc2</i>    | + | + |
| <i>Exoc6</i>    | + | + |
| <i>Exoc6b</i>   | + | + |
| <i>Exoc7</i>    | + | + |
| <i>Exosc3</i>   | + | + |
| <i>Exosc9</i>   | + | + |
| <i>Ext1</i>     | + | + |
| <i>Extl1</i>    | + | + |
| <i>Eya1</i>     | + | + |
| <i>Ezh1</i>     | + | + |
| <i>Faah</i>     | + | + |
| <i>Fabp5</i>    | + | + |
| <i>Fads3</i>    | + | + |
| <i>Faf2</i>     | + | + |
| <i>Fahd1</i>    | + | + |
| <i>Faim</i>     | + | + |
| <i>Fam101b</i>  | + | + |
| <i>Fam105a</i>  | + | + |
| <i>Fam108c</i>  | + | + |
| <i>Fam109a</i>  | + | + |
| <i>Fam110a</i>  | + | + |
| <i>Fam114a1</i> | + | + |
| <i>Fam120b</i>  | + | + |
| <i>Fam131a</i>  | + | + |
| <i>Fam131b</i>  | + | + |
| <i>Fam13b</i>   | + | + |
| <i>Fam160a2</i> | + | + |
| <i>Fam160b2</i> | + | + |
| <i>Fam168a</i>  | + | + |
| <i>Fam178a</i>  | + | + |
| <i>Fam187b</i>  | + | + |
| <i>Fam20b</i>   | + | + |
| <i>Fam210b</i>  | + | + |
| <i>Fam212a</i>  | + | + |
| <i>Fam212b</i>  | + | + |
| <i>Fam214b</i>  | + | + |
| <i>Fam219a</i>  | + | + |
| <i>Fam220a</i>  | + | + |
| <i>Fam221b</i>  | + | + |
| <i>Fam222a</i>  | + | + |
| <i>Fam227b</i>  | + | + |
| <i>Fam228b</i>  | + | + |
| <i>Fam43a</i>   | + | + |
| <i>Fam45a</i>   | + | + |
| <i>Fam46a</i>   | + | + |
| <i>Fam46c</i>   | + | + |
| <i>Fam46d</i>   | + | + |
| <i>Fam49a</i>   | + | + |
| <i>Fam57a</i>   | + | + |
| <i>Fam58b</i>   | + | + |
| <i>Fam64a</i>   | + | + |
| <i>Fam65a</i>   | + | + |

|                |   |   |
|----------------|---|---|
| <i>Fam76a</i>  | + | + |
| <i>Fam78a</i>  | + | + |
| <i>Fam83h</i>  | + | + |
| <i>Fam86</i>   | + | + |
| <i>Fam89b</i>  | + | + |
| <i>Fam92a</i>  | + | + |
| <i>Fam98a</i>  | + | + |
| <i>Fam98b</i>  | + | + |
| <i>Fam98c</i>  | + | + |
| <i>Fanca</i>   | + | + |
| <i>Fancl</i>   | + | + |
| <i>Fank1</i>   | + | + |
| <i>Far1</i>    | + | + |
| <i>Farp2</i>   | + | + |
| <i>Farsb</i>   | + | + |
| <i>Fastkd1</i> | + | + |
| <i>Fastkd5</i> | + | + |
| <i>Fbrs1</i>   | + | + |
| <i>Fbxl13</i>  | + | + |
| <i>Fbxl15</i>  | + | + |
| <i>Fbxl20</i>  | + | + |
| <i>Fbxl8</i>   | + | + |
| <i>Fbxo2</i>   | + | + |
| <i>Fbxo25</i>  | + | + |
| <i>Fbxo3</i>   | + | + |
| <i>Fbxo30</i>  | + | + |
| <i>Fbxo31</i>  | + | + |
| <i>Fbxo32</i>  | + | + |
| <i>Fbxo34</i>  | + | + |
| <i>Fbxo43</i>  | + | + |
| <i>Fbxo44</i>  | + | + |
| <i>Fbxo46</i>  | + | + |
| <i>Fbxo7</i>   | + | + |
| <i>Fbxw4</i>   | + | + |
| <i>Fbxw9</i>   | + | + |
| <i>Fdx1</i>    | + | + |
| <i>Fez2</i>    | + | + |
| <i>Fgf11</i>   | + | + |
| <i>Fgfbp3</i>  | + | + |
| <i>Fgfr1</i>   | + | + |
| <i>Fhod1</i>   | + | + |
| <i>Fitm2</i>   | + | + |
| <i>Fkbp11</i>  | + | + |
| <i>Fkbp14</i>  | + | + |
| <i>Fkbp1b</i>  | + | + |
| <i>Fkbp1</i>   | + | + |
| <i>Fli1</i>    | + | + |
| <i>Flii</i>    | + | + |
| <i>Flot1</i>   | + | + |
| <i>Flot2</i>   | + | + |
| <i>Fmn2</i>    | + | + |
| <i>Fmn13</i>   | + | + |
| <i>Fmo5</i>    | + | + |

|                      |   |   |
|----------------------|---|---|
| <i>Fn3krp</i>        | + | + |
| <i>Fndc3a</i>        | + | + |
| <i>Fndc8</i>         | + | + |
| <i>Fnip1</i>         | + | + |
| <i>Fntb</i>          | + | + |
| <i>Fopnl</i>         | + | + |
| <i>Fos</i>           | + | + |
| <i>Fosb</i>          | + | + |
| <i>Fosl1</i>         | + | + |
| <i>Fosl2</i>         | + | + |
| <i>Foxa3</i>         | + | + |
| <i>Foxc2</i>         | + | + |
| <i>Foxd2</i>         | + | + |
| <i>Foxn2</i>         | + | + |
| <i>Foxo3</i>         | + | + |
| <i>Foxp1</i>         | + | + |
| <i>Foxp4</i>         | + | + |
| <i>Fra10ac1</i>      | + | + |
| <i>Frat1</i>         | + | + |
| <i>Frat2</i>         | + | + |
| <i>Frg1</i>          | + | + |
| <i>Frmd4a</i>        | + | + |
| <i>Frmd6</i>         | + | + |
| <i>Frrs1</i>         | + | + |
| <i>Ftx</i>           | + | + |
| <i>Fubp3</i>         | + | + |
| <i>Fundc1</i>        | + | + |
| <i>Furin</i>         | + | + |
| <i>Fxr1</i>          | + | + |
| <i>Fxyd5</i>         | + | + |
| <i>Fyn</i>           | + | + |
| <i>Fzd4</i>          | + | + |
| <i>Fzd5</i>          | + | + |
| <i>Fzd7</i>          | + | + |
| <i>G2e3</i>          | + | + |
| <i>G6b</i>           | + | + |
| <i>G730013B05Rik</i> | + | + |
| <i>Gab3</i>          | + | + |
| <i>Gabarapl1</i>     | + | + |
| <i>Gabbr1</i>        | + | + |
| <i>Gadd45a</i>       | + | + |
| <i>Gadd45g</i>       | + | + |
| <i>Galc</i>          | + | + |
| <i>Galnt11</i>       | + | + |
| <i>Galnt12</i>       | + | + |
| <i>Galnt2</i>        | + | + |
| <i>Gapvd1</i>        | + | + |
| <i>Gar1</i>          | + | + |
| <i>Gas2l1</i>        | + | + |
| <i>Gas2l3</i>        | + | + |
| <i>Gas8</i>          | + | + |
| <i>Gata3</i>         | + | + |
| <i>Gatm</i>          | + | + |

|                |   |   |
|----------------|---|---|
| <i>Gatsl2</i>  | + | + |
| <i>Gatsl3</i>  | + | + |
| <i>Gba</i>     | + | + |
| <i>Gbe1</i>    | + | + |
| <i>Gbf1</i>    | + | + |
| <i>Gbp7</i>    | + | + |
| <i>Gca</i>     | + | + |
| <i>Gcdh</i>    | + | + |
| <i>Gchfr</i>   | + | + |
| <i>Gclm</i>    | + | + |
| <i>Gcsh</i>    | + | + |
| <i>Gde1</i>    | + | + |
| <i>Gdf11</i>   | + | + |
| <i>Gdpd5</i>   | + | + |
| <i>Gfer</i>    | + | + |
| <i>Gfi1</i>    | + | + |
| <i>Gfod1</i>   | + | + |
| <i>Ggh</i>     | + | + |
| <i>Ggn</i>     | + | + |
| <i>Gins1</i>   | + | + |
| <i>Git1</i>    | + | + |
| <i>Gja1</i>    | + | + |
| <i>Gkap1</i>   | + | + |
| <i>Glb1l</i>   | + | + |
| <i>Glipr2</i>  | + | + |
| <i>Glrx2</i>   | + | + |
| <i>Gls</i>     | + | + |
| <i>Gls2</i>    | + | + |
| <i>Glt28d2</i> | + | + |
| <i>Glul</i>    | + | + |
| <i>Gm10638</i> | + | + |
| <i>Gm10649</i> | + | + |
| <i>Gm10941</i> | + | + |
| <i>Gm13363</i> | + | + |
| <i>Gm13375</i> | + | + |
| <i>Gm13476</i> | + | + |
| <i>Gm13483</i> | + | + |
| <i>Gm14023</i> | + | + |
| <i>Gm14379</i> | + | + |
| <i>Gm14872</i> | + | + |
| <i>Gm15417</i> | + | + |
| <i>Gm15706</i> | + | + |
| <i>Gm15772</i> | + | + |
| <i>Gm16157</i> | + | + |
| <i>Gm1661</i>  | + | + |
| <i>Gm16677</i> | + | + |
| <i>Gm1673</i>  | + | + |
| <i>Gm16998</i> | + | + |
| <i>Gm17762</i> | + | + |
| <i>Gm17801</i> | + | + |
| <i>Gm20556</i> | + | + |
| <i>Gm4013</i>  | + | + |
| <i>Gm4636</i>  | + | + |

|                 |   |   |
|-----------------|---|---|
| <i>Gm4925</i>   | + | + |
| <i>Gm527</i>    | + | + |
| <i>Gm5475</i>   | + | + |
| <i>Gm5577</i>   | + | + |
| <i>Gm5617</i>   | + | + |
| <i>Gm5801</i>   | + | + |
| <i>Gm5918</i>   | + | + |
| <i>Gm6981</i>   | + | + |
| <i>Gm7854</i>   | + | + |
| <i>Gm8909</i>   | + | + |
| <i>Gm9920</i>   | + | + |
| <i>Gmps</i>     | + | + |
| <i>Gna12</i>    | + | + |
| <i>Gnas</i>     | + | + |
| <i>Gnb2</i>     | + | + |
| <i>Gnb4</i>     | + | + |
| <i>Gnb5</i>     | + | + |
| <i>Gne</i>      | + | + |
| <i>Gng12</i>    | + | + |
| <i>Gnl2</i>     | + | + |
| <i>Gnpda2</i>   | + | + |
| <i>Golim4</i>   | + | + |
| <i>Golm1</i>    | + | + |
| <i>Golph3</i>   | + | + |
| <i>Golph3l</i>  | + | + |
| <i>Gorasp2</i>  | + | + |
| <i>Gosr1</i>    | + | + |
| <i>Got1</i>     | + | + |
| <i>Gpam</i>     | + | + |
| <i>Gpank1</i>   | + | + |
| <i>Gpatch1</i>  | + | + |
| <i>Gpatch2</i>  | + | + |
| <i>Gpatch2l</i> | + | + |
| <i>Gpatch4</i>  | + | + |
| <i>Gpatch8</i>  | + | + |
| <i>Gpbp1</i>    | + | + |
| <i>Gpn1</i>     | + | + |
| <i>Gpr108</i>   | + | + |
| <i>Gpr135</i>   | + | + |
| <i>Gpr137</i>   | + | + |
| <i>Gpr157</i>   | + | + |
| <i>Gpr160</i>   | + | + |
| <i>Gpr180</i>   | + | + |
| <i>Gpr19</i>    | + | + |
| <i>Gpr3</i>     | + | + |
| <i>Gpr65</i>    | + | + |
| <i>Gpr89</i>    | + | + |
| <i>Gpsm2</i>    | + | + |
| <i>Gpsm3</i>    | + | + |
| <i>Gpt2</i>     | + | + |
| <i>Grasp</i>    | + | + |
| <i>Grk5</i>     | + | + |
| <i>Grlf1</i>    | + | + |

|                 |   |   |
|-----------------|---|---|
| <i>Grtp1</i>    | + | + |
| <i>Grwd1</i>    | + | + |
| <i>Gse1</i>     | + | + |
| <i>Gsg2</i>     | + | + |
| <i>Gsn</i>      | + | + |
| <i>Gspt1</i>    | + | + |
| <i>Gsr</i>      | + | + |
| <i>Gsto1</i>    | + | + |
| <i>Gsto2</i>    | + | + |
| <i>Gtf2e2</i>   | + | + |
| <i>Gtf2h2</i>   | + | + |
| <i>Gtf2i</i>    | + | + |
| <i>Gtf2ird1</i> | + | + |
| <i>Gtf3c3</i>   | + | + |
| <i>Gtpbp10</i>  | + | + |
| <i>Gtpbp4</i>   | + | + |
| <i>Gtpbp8</i>   | + | + |
| <i>Guk1</i>     | + | + |
| <i>Gylt1b</i>   | + | + |
| <i>H13</i>      | + | + |
| <i>H1f0</i>     | + | + |
| <i>H1fx</i>     | + | + |
| <i>H2-BI</i>    | + | + |
| <i>H2-K1</i>    | + | + |
| <i>H2-Q2</i>    | + | + |
| <i>H2-Q4</i>    | + | + |
| <i>H2afy</i>    | + | + |
| <i>H3f3b</i>    | + | + |
| <i>H6pd</i>     | + | + |
| <i>Habp4</i>    | + | + |
| <i>Hagh</i>     | + | + |
| <i>Hap1</i>     | + | + |
| <i>Haus4</i>    | + | + |
| <i>Haus5</i>    | + | + |
| <i>Haus6</i>    | + | + |
| <i>Hbegf</i>    | + | + |
| <i>Hbp1</i>     | + | + |
| <i>Hcfc1r1</i>  | + | + |
| <i>Hcrt</i>     | + | + |
| <i>Hdac2</i>    | + | + |
| <i>Hdac5</i>    | + | + |
| <i>Hddc2</i>    | + | + |
| <i>Heatr1</i>   | + | + |
| <i>Heatr6</i>   | + | + |
| <i>Hectd2</i>   | + | + |
| <i>Helz</i>     | + | + |
| <i>Hemk1</i>    | + | + |
| <i>Herc1</i>    | + | + |
| <i>Hes1</i>     | + | + |
| <i>Hes5</i>     | + | + |
| <i>Hes7</i>     | + | + |
| <i>Hexim1</i>   | + | + |
| <i>Hey1</i>     | + | + |

|                     |   |   |
|---------------------|---|---|
| <i>Hhat</i>         | + | + |
| <i>Hhex</i>         | + | + |
| <i>Hic2</i>         | + | + |
| <i>Hif1an</i>       | + | + |
| <i>Hilpda</i>       | + | + |
| <i>Hint2</i>        | + | + |
| <i>Hip1</i>         | + | + |
| <i>Hipk1</i>        | + | + |
| <i>Hipk2</i>        | + | + |
| <i>Hist1h1e</i>     | + | + |
| <i>Hist1h2be</i>    | + | + |
| <i>Hist3h2a</i>     | + | + |
| <i>Hist3h2ba</i>    | + | + |
| <i>Hist3h2bb-ps</i> | + | + |
| <i>Hjurp</i>        | + | + |
| <i>Hk2</i>          | + | + |
| <i>Hlcs</i>         | + | + |
| <i>Hlx</i>          | + | + |
| <i>Hmbox1</i>       | + | + |
| <i>Hmga1</i>        | + | + |
| <i>Hmga1-rs1</i>    | + | + |
| <i>Hmgn3</i>        | + | + |
| <i>Hmgxb4</i>       | + | + |
| <i>Hmox1</i>        | + | + |
| <i>Hmx2</i>         | + | + |
| <i>Homer1</i>       | + | + |
| <i>Homer3</i>       | + | + |
| <i>Hook1</i>        | + | + |
| <i>Hopx</i>         | + | + |
| <i>Hoxb4</i>        | + | + |
| <i>Hpcal1</i>       | + | + |
| <i>Hrc</i>          | + | + |
| <i>Hs1bp3</i>       | + | + |
| <i>Hs3st1</i>       | + | + |
| <i>Hs3st3b1</i>     | + | + |
| <i>Hsd11b2</i>      | + | + |
| <i>Hsd17b10</i>     | + | + |
| <i>Hsd17b11</i>     | + | + |
| <i>Hsd17b12</i>     | + | + |
| <i>Hsd11</i>        | + | + |
| <i>Hsf2</i>         | + | + |
| <i>Hspa12a</i>      | + | + |
| <i>Hspa1a</i>       | + | + |
| <i>Hspa1b</i>       | + | + |
| <i>Hspa1l</i>       | + | + |
| <i>Hspa2</i>        | + | + |
| <i>Hspa4l</i>       | + | + |
| <i>Hspbap1</i>      | + | + |
| <i>Hspbp1</i>       | + | + |
| <i>Htt</i>          | + | + |
| <i>Hyi</i>          | + | + |
| <i>Hyls1</i>        | + | + |
| <i>Ibtk</i>         | + | + |



|                 |   |   |
|-----------------|---|---|
| <i>lcam4</i>    | + | + |
| <i>lcam5</i>    | + | + |
| <i>lcmt</i>     | + | + |
| <i>lcosl</i>    | + | + |
| <i>ld2</i>      | + | + |
| <i>ld3</i>      | + | + |
| <i>ldh1</i>     | + | + |
| <i>ldnk</i>     | + | + |
| <i>ldua</i>     | + | + |
| <i>ler3</i>     | + | + |
| <i>ler5l</i>    | + | + |
| <i>lfi27l2a</i> | + | + |
| <i>lfi35</i>    | + | + |
| <i>lfit2</i>    | + | + |
| <i>lfnlr1</i>   | + | + |
| <i>lft172</i>   | + | + |
| <i>lft43</i>    | + | + |
| <i>lft52</i>    | + | + |
| <i>lft57</i>    | + | + |
| <i>lft88</i>    | + | + |
| <i>lgf2bp3</i>  | + | + |
| <i>lkbkb</i>    | + | + |
| <i>lkzf5</i>    | + | + |
| <i>ll15ra</i>   | + | + |
| <i>ll17d</i>    | + | + |
| <i>ll17ra</i>   | + | + |
| <i>ll17rd</i>   | + | + |
| <i>ll1rl2</i>   | + | + |
| <i>ll27ra</i>   | + | + |
| <i>ll6ra</i>    | + | + |
| <i>ll6st</i>    | + | + |
| <i>llf3</i>     | + | + |
| <i>llvbl</i>    | + | + |
| <i>lmmt</i>     | + | + |
| <i>lmp3</i>     | + | + |
| <i>lmpa1</i>    | + | + |
| <i>lmpdh1</i>   | + | + |
| <i>lnca1</i>    | + | + |
| <i>lng3</i>     | + | + |
| <i>lnpp4a</i>   | + | + |
| <i>lnpp5a</i>   | + | + |
| <i>lnppl1</i>   | + | + |
| <i>lnsl6</i>    | + | + |
| <i>lnts9</i>    | + | + |
| <i>lpo11</i>    | + | + |
| <i>lqcd</i>     | + | + |
| <i>lqcg</i>     | + | + |
| <i>lqgap1</i>   | + | + |
| <i>lqgap3</i>   | + | + |
| <i>lqsec1</i>   | + | + |
| <i>lrak3</i>    | + | + |
| <i>lreb2</i>    | + | + |
| <i>lrf1</i>     | + | + |

|                |    |   |
|----------------|----|---|
| <i>Irf2bp1</i> | +  | + |
| <i>Irf4</i>    | +* | + |
| <i>Irf7</i>    | +  | + |
| <i>Irgm1</i>   | +  | + |
| <i>Irs2</i>    | +  | + |
| <i>Isg15</i>   | +  | + |
| <i>Isir2</i>   | +  | + |
| <i>Isoc1</i>   | +  | + |
| <i>Ispd</i>    | +  | + |
| <i>Ist1</i>    | +  | + |
| <i>Itf3</i>    | +  | + |
| <i>Itga6</i>   | +  | + |
| <i>Itgb3</i>   | +  | + |
| <i>Itgb4</i>   | +  | + |
| <i>Itgb5</i>   | +  | + |
| <i>Itpka</i>   | +  | + |
| <i>Itn1</i>    | +  | + |
| <i>Ivd</i>     | +  | + |
| <i>Jag1</i>    | +  | + |
| <i>Jak2</i>    | +  | + |
| <i>Jarid2</i>  | +  | + |
| <i>Jazf1</i>   | +  | + |
| <i>Jdp2</i>    | +  | + |
| <i>Jkamp</i>   | +  | + |
| <i>Jmjd1c</i>  | +  | + |
| <i>Jmy</i>     | +  | + |
| <i>Josd2</i>   | +  | + |
| <i>Jun</i>     | +  | + |
| <i>Jup</i>     | +  | + |
| <i>Kank2</i>   | +  | + |
| <i>Kank3</i>   | +  | + |
| <i>Kansl3</i>  | +  | + |
| <i>Kat5</i>    | +  | + |
| <i>Kat6a</i>   | +  | + |
| <i>Kat6b</i>   | +  | + |
| <i>Katnb1</i>  | +  | + |
| <i>Kazald1</i> | +  | + |
| <i>Kbtbd12</i> | +  | + |
| <i>Kbtbd2</i>  | +  | + |
| <i>Kbtbd8</i>  | +  | + |
| <i>Kcnab2</i>  | +  | + |
| <i>Kcnip1</i>  | +  | + |
| <i>Kcnk13</i>  | +  | + |
| <i>Kcnmb4</i>  | +  | + |
| <i>Kcns1</i>   | +  | + |
| <i>Kctd1</i>   | +  | + |
| <i>Kctd12</i>  | +  | + |
| <i>Kctd18</i>  | +  | + |
| <i>Kctd21</i>  | +  | + |
| <i>Kctd3</i>   | +  | + |
| <i>Kdelc1</i>  | +  | + |
| <i>Kdelr1</i>  | +  | + |
| <i>Kdm1b</i>   | +  | + |

|                  |   |   |
|------------------|---|---|
| <i>Kdm2a</i>     | + | + |
| <i>Kdm2b</i>     | + | + |
| <i>Kdm3a</i>     | + | + |
| <i>Kdm5b</i>     | + | + |
| <i>Kdm5c</i>     | + | + |
| <i>Keap1</i>     | + | + |
| <i>Khyn</i>      | + | + |
| <i>Kidins220</i> | + | + |
| <i>Kif17</i>     | + | + |
| <i>Kif18b</i>    | + | + |
| <i>Kif1b</i>     | + | + |
| <i>Kif1c</i>     | + | + |
| <i>Kif22</i>     | + | + |
| <i>Kif3a</i>     | + | + |
| <i>Kif3b</i>     | + | + |
| <i>Kif5c</i>     | + | + |
| <i>Kifc2</i>     | + | + |
| <i>Kifc5b</i>    | + | + |
| <i>Kis2</i>      | + | + |
| <i>Kiss1r</i>    | + | + |
| <i>Klc1</i>      | + | + |
| <i>Klc2</i>      | + | + |
| <i>Klf1</i>      | + | + |
| <i>Klf10</i>     | + | + |
| <i>Klf11</i>     | + | + |
| <i>Klf2</i>      | + | + |
| <i>Klf3</i>      | + | + |
| <i>Klf7</i>      | + | + |
| <i>Klf9</i>      | + | + |
| <i>Klhdc10</i>   | + | + |
| <i>Klhdc5</i>    | + | + |
| <i>Klh12</i>     | + | + |
| <i>Klh14</i>     | + | + |
| <i>Klh15</i>     | + | + |
| <i>Klh120</i>    | + | + |
| <i>Klh121</i>    | + | + |
| <i>Klh125</i>    | + | + |
| <i>Klh126</i>    | + | + |
| <i>Klh136</i>    | + | + |
| <i>Klh17</i>     | + | + |
| <i>Klh18</i>     | + | + |
| <i>Klh19</i>     | + | + |
| <i>Knstrn</i>    | + | + |
| <i>Kpna2</i>     | + | + |
| <i>Kpna3</i>     | + | + |
| <i>Kpna4</i>     | + | + |
| <i>Kras</i>      | + | + |
| <i>Krba1</i>     | + | + |
| <i>Kremen1</i>   | + | + |
| <i>Krr1</i>      | + | + |
| <i>L1cam</i>     | + | + |
| <i>L3hypdh</i>   | + | + |
| <i>L3mbtl2</i>   | + | + |

|                     |   |   |
|---------------------|---|---|
| <i>Lamc1</i>        | + | + |
| <i>Lancl2</i>       | + | + |
| <i>Lap3</i>         | + | + |
| <i>Laptm4b</i>      | + | + |
| <i>Larp1b</i>       | + | + |
| <i>Larp4</i>        | + | + |
| <i>Lars</i>         | + | + |
| <i>Lars2</i>        | + | + |
| <i>Lca5l</i>        | + | + |
| <i>Lclat1</i>       | + | + |
| <i>Lcmt1</i>        | + | + |
| <i>Lcorl</i>        | + | + |
| <i>Lcp1</i>         | + | + |
| <i>Ldb1</i>         | + | + |
| <i>Ldlrad4</i>      | + | + |
| <i>Ldlrap1</i>      | + | + |
| <i>Lemd3</i>        | + | + |
| <i>Leng9</i>        | + | + |
| <i>Lepre1</i>       | + | + |
| <i>Leprotil1</i>    | + | + |
| <i>Lfng</i>         | + | + |
| <i>Lgals8</i>       | + | + |
| <i>Lgalsl</i>       | + | + |
| <i>Lhfpl4</i>       | + | + |
| <i>Lhpp</i>         | + | + |
| <i>Lhx1</i>         | + | + |
| <i>Lhx9</i>         | + | + |
| <i>Limk1</i>        | + | + |
| <i>Lin52</i>        | + | + |
| <i>Lin7c</i>        | + | + |
| <i>Lipt1</i>        | + | + |
| <i>Lix1l</i>        | + | + |
| <i>Lmbr1</i>        | + | + |
| <i>Lmbrd1</i>       | + | + |
| <i>Lmf1</i>         | + | + |
| <i>Lmnb2</i>        | + | + |
| <i>Lmo7</i>         | + | + |
| <i>Lmtk2</i>        | + | + |
| <i>Lmtk3</i>        | + | + |
| <i>Lnp</i>          | + | + |
| <i>LOC100504608</i> | + | + |
| <i>LOC100504703</i> | + | + |
| <i>Lonrf1</i>       | + | + |
| <i>Lrba</i>         | + | + |
| <i>Lrguk</i>        | + | + |
| <i>Lrif1</i>        | + | + |
| <i>Lrp1</i>         | + | + |
| <i>Lrp11</i>        | + | + |
| <i>Lrp6</i>         | + | + |
| <i>Lrpap1</i>       | + | + |
| <i>Lrr1</i>         | + | + |
| <i>Lrrc1</i>        | + | + |
| <i>Lrrc20</i>       | + | + |

|                |   |   |
|----------------|---|---|
| <i>Lrrc24</i>  | + | + |
| <i>Lrrc28</i>  | + | + |
| <i>Lrrc3</i>   | + | + |
| <i>Lrrc46</i>  | + | + |
| <i>Lrrc58</i>  | + | + |
| <i>Lrrc61</i>  | + | + |
| <i>Lrrc63</i>  | + | + |
| <i>Lrrc72</i>  | + | + |
| <i>Lrrc8b</i>  | + | + |
| <i>Lrrcc1</i>  | + | + |
| <i>Lrrfip1</i> | + | + |
| <i>Lsg1</i>    | + | + |
| <i>Lsm14b</i>  | + | + |
| <i>Lsm5</i>    | + | + |
| <i>Lsm6</i>    | + | + |
| <i>Lsr</i>     | + | + |
| <i>Luc7l</i>   | + | + |
| <i>Luzp1</i>   | + | + |
| <i>Lyl1</i>    | + | + |
| <i>Lyn</i>     | + | + |
| <i>Lypd3</i>   | + | + |
| <i>Lypla1</i>  | + | + |
| <i>Lyrm5</i>   | + | + |
| <i>Lztf1</i>   | + | + |
| <i>Lztr1</i>   | + | + |
| <i>Lzts2</i>   | + | + |
| <i>Mab21l2</i> | + | + |
| <i>MacroD1</i> | + | + |
| <i>Mad2l2</i>  | + | + |
| <i>Maf</i>     | + | + |
| <i>Maff</i>    | + | + |
| <i>Magi3</i>   | + | + |
| <i>Magt1</i>   | + | + |
| <i>Malsu1</i>  | + | + |
| <i>Maml3</i>   | + | + |
| <i>Man1a</i>   | + | + |
| <i>Man1a2</i>  | + | + |
| <i>Man1b1</i>  | + | + |
| <i>Man1c1</i>  | + | + |
| <i>Manea</i>   | + | + |
| <i>Map1a</i>   | + | + |
| <i>Map3k1</i>  | + | + |
| <i>Map3k6</i>  | + | + |
| <i>Map3k8</i>  | + | + |
| <i>Map3k9</i>  | + | + |
| <i>Map7</i>    | + | + |
| <i>Mapk1</i>   | + | + |
| <i>Mapk11</i>  | + | + |
| <i>Mapk8</i>   | + | + |
| <i>Mapre2</i>  | + | + |
| <i>Mapre3</i>  | + | + |
| <i>Marc2</i>   | + | + |
| <i>March2</i>  | + | + |

|                |   |   |
|----------------|---|---|
| <i>March3</i>  | + | + |
| <i>March5</i>  | + | + |
| <i>March6</i>  | + | + |
| <i>Mark3</i>   | + | + |
| <i>Mark4</i>   | + | + |
| <i>Mars2</i>   | + | + |
| <i>Mast2</i>   | + | + |
| <i>Matk</i>    | + | + |
| <i>Mavs</i>    | + | + |
| <i>Mbip</i>    | + | + |
| <i>Mbnl2</i>   | + | + |
| <i>Mbnl3</i>   | + | + |
| <i>Mbtd1</i>   | + | + |
| <i>Mcfd2</i>   | + | + |
| <i>Mcm3</i>    | + | + |
| <i>Mcm9</i>    | + | + |
| <i>Mcmbp</i>   | + | + |
| <i>Mcu</i>     | + | + |
| <i>Mecr</i>    | + | + |
| <i>Med13</i>   | + | + |
| <i>Med13l</i>  | + | + |
| <i>Med24</i>   | + | + |
| <i>Med27</i>   | + | + |
| <i>Med6</i>    | + | + |
| <i>Med7</i>    | + | + |
| <i>Med9</i>    | + | + |
| <i>Megf9</i>   | + | + |
| <i>Meig1</i>   | + | + |
| <i>Meiob</i>   | + | + |
| <i>Meis3</i>   | + | + |
| <i>Metap1</i>  | + | + |
| <i>Metap1d</i> | + | + |
| <i>Metrn</i>   | + | + |
| <i>Metrnl</i>  | + | + |
| <i>Mettl1</i>  | + | + |
| <i>Mettl14</i> | + | + |
| <i>Mettl16</i> | + | + |
| <i>Mettl5</i>  | + | + |
| <i>Mettl9</i>  | + | + |
| <i>Mex3a</i>   | + | + |
| <i>Mex3b</i>   | + | + |
| <i>Mex3d</i>   | + | + |
| <i>Mff</i>     | + | + |
| <i>Mfsd5</i>   | + | + |
| <i>Mfsd6</i>   | + | + |
| <i>Mfsd7b</i>  | + | + |
| <i>Mga</i>     | + | + |
| <i>Mgarp</i>   | + | + |
| <i>Mgst3</i>   | + | + |
| <i>Mib1</i>    | + | + |
| <i>Mib2</i>    | + | + |
| <i>Mid1</i>    | + | + |
| <i>Mier3</i>   | + | + |

|                 |   |   |
|-----------------|---|---|
| <i>Mipep</i>    | + | + |
| <i>Mir101c</i>  | + | + |
| <i>Mir106a</i>  | + | + |
| <i>Mir10a</i>   | + | + |
| <i>Mir142</i>   | + | + |
| <i>Mir148a</i>  | + | + |
| <i>Mir17</i>    | + | + |
| <i>Mir18</i>    | + | + |
| <i>Mir18b</i>   | + | + |
| <i>Mir1900</i>  | + | + |
| <i>Mir1904</i>  | + | + |
| <i>Mir1907</i>  | + | + |
| <i>Mir193</i>   | + | + |
| <i>Mir1932</i>  | + | + |
| <i>Mir1945</i>  | + | + |
| <i>Mir1949</i>  | + | + |
| <i>Mir19a</i>   | + | + |
| <i>Mir19b-1</i> | + | + |
| <i>Mir203</i>   | + | + |
| <i>Mir20a</i>   | + | + |
| <i>Mir20b</i>   | + | + |
| <i>Mir26b</i>   | + | + |
| <i>Mir320</i>   | + | + |
| <i>Mir330</i>   | + | + |
| <i>Mir423</i>   | + | + |
| <i>Mir449c</i>  | + | + |
| <i>Mir5100</i>  | + | + |
| <i>Mir5122</i>  | + | + |
| <i>Mir5130</i>  | + | + |
| <i>Mir5131</i>  | + | + |
| <i>Mir5133</i>  | + | + |
| <i>Mir5135</i>  | + | + |
| <i>Mir574</i>   | + | + |
| <i>Mir688</i>   | + | + |
| <i>Mir762</i>   | + | + |
| <i>Mir804</i>   | + | + |
| <i>Mir9-2</i>   | + | + |
| <i>Mir92b</i>   | + | + |
| <i>Mki67ip</i>  | + | + |
| <i>Mkrn1</i>    | + | + |
| <i>Mkl</i>      | + | + |
| <i>Mll1</i>     | + | + |
| <i>Mll2</i>     | + | + |
| <i>Mllt1</i>    | + | + |
| <i>Mllt10</i>   | + | + |
| <i>Mlst8</i>    | + | + |
| <i>Mlx</i>      | + | + |
| <i>Mlycd</i>    | + | + |
| <i>Mmadhc</i>   | + | + |
| <i>Mmp17</i>    | + | + |
| <i>Mmp23</i>    | + | + |
| <i>Mnat1</i>    | + | + |
| <i>Mnf1</i>     | + | + |

|                 |   |   |
|-----------------|---|---|
| <i>Mocos</i>    | + | + |
| <i>Mocs2</i>    | + | + |
| <i>Mon1a</i>    | + | + |
| <i>Mon2</i>     | + | + |
| <i>Morf4l1</i>  | + | + |
| <i>Morn5</i>    | + | + |
| <i>Mpg</i>      | + | + |
| <i>Mphosph6</i> | + | + |
| <i>Mplkip</i>   | + | + |
| <i>Mpp5</i>     | + | + |
| <i>Mpp6</i>     | + | + |
| <i>Mpp7</i>     | + | + |
| <i>Mpz</i>      | + | + |
| <i>Mpzl1</i>    | + | + |
| <i>Mpzl3</i>    | + | + |
| <i>Mr1</i>      | + | + |
| <i>Mrfap1</i>   | + | + |
| <i>Mrpl10</i>   | + | + |
| <i>Mrpl14</i>   | + | + |
| <i>Mrpl15</i>   | + | + |
| <i>Mrpl20</i>   | + | + |
| <i>Mrpl23</i>   | + | + |
| <i>Mrpl35</i>   | + | + |
| <i>Mrpl39</i>   | + | + |
| <i>Mrpl45</i>   | + | + |
| <i>Mrpl48</i>   | + | + |
| <i>Mrpl52</i>   | + | + |
| <i>Mrpl9</i>    | + | + |
| <i>Mrps18a</i>  | + | + |
| <i>Mrps2</i>    | + | + |
| <i>Mrps22</i>   | + | + |
| <i>Mrps23</i>   | + | + |
| <i>Mrps24</i>   | + | + |
| <i>Mrps30</i>   | + | + |
| <i>Mrps35</i>   | + | + |
| <i>Mrps5</i>    | + | + |
| <i>Mrps6</i>    | + | + |
| <i>Mrps9</i>    | + | + |
| <i>Msantd2</i>  | + | + |
| <i>Msra</i>     | + | + |
| <i>Msx3</i>     | + | + |
| <i>Mtag2</i>    | + | + |
| <i>Mtap</i>     | + | + |
| <i>Mtfr1</i>    | + | + |
| <i>Mtfr1l</i>   | + | + |
| <i>Mthfsd</i>   | + | + |
| <i>Mtif2</i>    | + | + |
| <i>Mtmr9</i>    | + | + |
| <i>Mto1</i>     | + | + |
| <i>Mtrf1l</i>   | + | + |
| <i>Mtx1</i>     | + | + |
| <i>Mtx2</i>     | + | + |
| <i>Mtx3</i>     | + | + |



|                |   |   |
|----------------|---|---|
| <i>Muc1</i>    | + | + |
| <i>Mul1</i>    | + | + |
| <i>Mxi1</i>    | + | + |
| <i>Myadml2</i> | + | + |
| <i>Myb</i>     | + | + |
| <i>Mycbpap</i> | + | + |
| <i>Mycl1</i>   | + | + |
| <i>Myef2</i>   | + | + |
| <i>Mynn</i>    | + | + |
| <i>Myo10</i>   | + | + |
| <i>Myo1d</i>   | + | + |
| <i>Myo6</i>    | + | + |
| <i>Myo9a</i>   | + | + |
| <i>Myof</i>    | + | + |
| <i>Mypop</i>   | + | + |
| <i>Mzb1</i>    | + | + |
| <i>N4bp2</i>   | + | + |
| <i>N6amt2</i>  | + | + |
| <i>Naa35</i>   | + | + |
| <i>Nadkd1</i>  | + | + |
| <i>Nae1</i>    | + | + |
| <i>Naga</i>    | + | + |
| <i>Naglu</i>   | + | + |
| <i>Nars</i>    | + | + |
| <i>Nav2</i>    | + | + |
| <i>Nbas</i>    | + | + |
| <i>Ncapd3</i>  | + | + |
| <i>Nck1</i>    | + | + |
| <i>Nckap1l</i> | + | + |
| <i>Nckap5l</i> | + | + |
| <i>Ncoa7</i>   | + | + |
| <i>Ndel1</i>   | + | + |
| <i>Ndfip2</i>  | + | + |
| <i>Ndnf</i>    | + | + |
| <i>Ndrg1</i>   | + | + |
| <i>Ndufa10</i> | + | + |
| <i>Ndufa8</i>  | + | + |
| <i>Ndufb10</i> | + | + |
| <i>Ndufb8</i>  | + | + |
| <i>Ndufs2</i>  | + | + |
| <i>Ndufs4</i>  | + | + |
| <i>Ndufv1</i>  | + | + |
| <i>Ndufv3</i>  | + | + |
| <i>Nedd4</i>   | + | + |
| <i>Nedd4l</i>  | + | + |
| <i>Neil2</i>   | + | + |
| <i>Neil3</i>   | + | + |
| <i>Nek11</i>   | + | + |
| <i>Nek5</i>    | + | + |
| <i>Nespas</i>  | + | + |
| <i>Neurl1a</i> | + | + |
| <i>Neurl1b</i> | + | + |
| <i>Nfatc1</i>  | + | + |

|                  |   |   |
|------------------|---|---|
| <i>Nfatc2</i>    | + | + |
| <i>Nfe2l1</i>    | + | + |
| <i>Nfil3</i>     | + | + |
| <i>Nfkbie</i>    | + | + |
| <i>Ngdn</i>      | + | + |
| <i>Nhp2l1</i>    | + | + |
| <i>Nin</i>       | + | + |
| <i>Nipal1</i>    | + | + |
| <i>Nipsnap1</i>  | + | + |
| <i>Nipsnap3b</i> | + | + |
| <i>Nisch</i>     | + | + |
| <i>Nkapl</i>     | + | + |
| <i>Nkrf</i>      | + | + |
| <i>Nle1</i>      | + | + |
| <i>Nlk</i>       | + | + |
| <i>Nln</i>       | + | + |
| <i>Nmt2</i>      | + | + |
| <i>Nob1</i>      | + | + |
| <i>Noc3l</i>     | + | + |
| <i>Nod1</i>      | + | + |
| <i>Nol6</i>      | + | + |
| <i>Nom1</i>      | + | + |
| <i>Nop58</i>     | + | + |
| <i>Notch1</i>    | + | + |
| <i>Notch2</i>    | + | + |
| <i>Nova1</i>     | + | + |
| <i>Noxo1</i>     | + | + |
| <i>Npcd</i>      | + | + |
| <i>Npdc1</i>     | + | + |
| <i>Nphp1</i>     | + | + |
| <i>Nphp3</i>     | + | + |
| <i>Nphp4</i>     | + | + |
| <i>Npm1</i>      | + | + |
| <i>Npm3</i>      | + | + |
| <i>Nprl3</i>     | + | + |
| <i>Nptn</i>      | + | + |
| <i>Nr1d2</i>     | + | + |
| <i>Nr2f6</i>     | + | + |
| <i>Nr6a1</i>     | + | + |
| <i>Nrbp1</i>     | + | + |
| <i>Nrd1</i>      | + | + |
| <i>Nrip1</i>     | + | + |
| <i>Nrxn2</i>     | + | + |
| <i>Nsl1</i>      | + | + |
| <i>Nsun2</i>     | + | + |
| <i>Nt5c2</i>     | + | + |
| <i>Nt5e</i>      | + | + |
| <i>Ntmt1</i>     | + | + |
| <i>Ntpcr</i>     | + | + |
| <i>Nuak2</i>     | + | + |
| <i>Nubp1</i>     | + | + |
| <i>Nucks1</i>    | + | + |
| <i>Nudc</i>      | + | + |

|                 |   |   |
|-----------------|---|---|
| <i>Nudcd3</i>   | + | + |
| <i>Nudt19</i>   | + | + |
| <i>Nudt4</i>    | + | + |
| <i>Numb</i>     | + | + |
| <i>Numb1</i>    | + | + |
| <i>Nup214</i>   | + | + |
| <i>Nup93</i>    | + | + |
| <i>Nupr11</i>   | + | + |
| <i>Nus1</i>     | + | + |
| <i>Nxn</i>      | + | + |
| <i>Nxn12</i>    | + | + |
| <i>Nxt1</i>     | + | + |
| <i>Nxt2</i>     | + | + |
| <i>Nyap1</i>    | + | + |
| <i>Oaf</i>      | + | + |
| <i>Oat</i>      | + | + |
| <i>Obfc1</i>    | + | + |
| <i>Odc1</i>     | + | + |
| <i>Odf2</i>     | + | + |
| <i>Odf3b</i>    | + | + |
| <i>Ogdh</i>     | + | + |
| <i>Ogfr11</i>   | + | + |
| <i>Ogt</i>      | + | + |
| <i>Olfml2b</i>  | + | + |
| <i>Opa1</i>     | + | + |
| <i>Oraov1</i>   | + | + |
| <i>Ormdl3</i>   | + | + |
| <i>Osbp</i>     | + | + |
| <i>Osbpl1a</i>  | + | + |
| <i>Osbpl2</i>   | + | + |
| <i>Osbpl3</i>   | + | + |
| <i>Osbpl6</i>   | + | + |
| <i>Osbpl9</i>   | + | + |
| <i>Osgin2</i>   | + | + |
| <i>Ostc</i>     | + | + |
| <i>Otud3</i>    | + | + |
| <i>Otud6b</i>   | + | + |
| <i>Otud7b</i>   | + | + |
| <i>Oxct1</i>    | + | + |
| <i>Oxr1</i>     | + | + |
| <i>P2rx3</i>    | + | + |
| <i>P2rx4</i>    | + | + |
| <i>P4ha1</i>    | + | + |
| <i>Pabpc4</i>   | + | + |
| <i>Pacrg</i>    | + | + |
| <i>Pacsin1</i>  | + | + |
| <i>Pacsin3</i>  | + | + |
| <i>Pafah1b1</i> | + | + |
| <i>Pafah1b3</i> | + | + |
| <i>Pafah2</i>   | + | + |
| <i>Pag1</i>     | + | + |
| <i>Paip1</i>    | + | + |
| <i>Pank3</i>    | + | + |

|                |   |   |
|----------------|---|---|
| <i>Pank4</i>   | + | + |
| <i>Paox</i>    | + | + |
| <i>Papd4</i>   | + | + |
| <i>Papd5</i>   | + | + |
| <i>Papolg</i>  | + | + |
| <i>Paqr3</i>   | + | + |
| <i>Paqr4</i>   | + | + |
| <i>Paqr7</i>   | + | + |
| <i>Paqr8</i>   | + | + |
| <i>Pard3b</i>  | + | + |
| <i>Pard6b</i>  | + | + |
| <i>Pard6g</i>  | + | + |
| <i>Park2</i>   | + | + |
| <i>Parm1</i>   | + | + |
| <i>Parp14</i>  | + | + |
| <i>Parp16</i>  | + | + |
| <i>Pawr</i>    | + | + |
| <i>Paxbp1</i>  | + | + |
| <i>Pbdc1</i>   | + | + |
| <i>Pbx1</i>    | + | + |
| <i>Pbx3</i>    | + | + |
| <i>Pcbp4</i>   | + | + |
| <i>Pccb</i>    | + | + |
| <i>Pcdhgc3</i> | + | + |
| <i>Pcdhgc4</i> | + | + |
| <i>Pced1b</i>  | + | + |
| <i>Pcf11</i>   | + | + |
| <i>Pcgf1</i>   | + | + |
| <i>Pcgf3</i>   | + | + |
| <i>Pcnx</i>    | + | + |
| <i>Pctp</i>    | + | + |
| <i>Pcx</i>     | + | + |
| <i>Pcyox1</i>  | + | + |
| <i>Pcyt1a</i>  | + | + |
| <i>Pcyt1b</i>  | + | + |
| <i>Pdcd10</i>  | + | + |
| <i>Pdcd7</i>   | + | + |
| <i>Pde2a</i>   | + | + |
| <i>Pde4dip</i> | + | + |
| <i>Pdhb</i>    | + | + |
| <i>Pdik1l</i>  | + | + |
| <i>Pdlim1</i>  | + | + |
| <i>Pdlim2</i>  | + | + |
| <i>Pdlim3</i>  | + | + |
| <i>Pdlim7</i>  | + | + |
| <i>Pdrg1</i>   | + | + |
| <i>Pdzd7</i>   | + | + |
| <i>Pear1</i>   | + | + |
| <i>Pecr</i>    | + | + |
| <i>Peli1</i>   | + | + |
| <i>Per2</i>    | + | + |
| <i>Per3</i>    | + | + |
| <i>Pes1</i>    | + | + |

|                 |   |   |
|-----------------|---|---|
| <i>Pex11a</i>   | + | + |
| <i>Pex14</i>    | + | + |
| <i>Pex16</i>    | + | + |
| <i>Pex26</i>    | + | + |
| <i>Pex5</i>     | + | + |
| <i>Pfdn1</i>    | + | + |
| <i>Pfdn4</i>    | + | + |
| <i>Pfkl</i>     | + | + |
| <i>Pfkm</i>     | + | + |
| <i>Pfn2</i>     | + | + |
| <i>Pfn4</i>     | + | + |
| <i>Pgap1</i>    | + | + |
| <i>Pgap3</i>    | + | + |
| <i>Pgbd1</i>    | + | + |
| <i>Pgm2</i>     | + | + |
| <i>Pgm2l1</i>   | + | + |
| <i>Pgrmc1</i>   | + | + |
| <i>Pgrmc2</i>   | + | + |
| <i>Pgs1</i>     | + | + |
| <i>Phactr2</i>  | + | + |
| <i>Phactr4</i>  | + | + |
| <i>Phc1</i>     | + | + |
| <i>Phf12</i>    | + | + |
| <i>Phf13</i>    | + | + |
| <i>Phf17</i>    | + | + |
| <i>Phf20l1</i>  | + | + |
| <i>Phf21b</i>   | + | + |
| <i>Phlda1</i>   | + | + |
| <i>Phpt1</i>    | + | + |
| <i>Phrf1</i>    | + | + |
| <i>Pi4k2a</i>   | + | + |
| <i>Pi4k2b</i>   | + | + |
| <i>Pias3</i>    | + | + |
| <i>Pick1</i>    | + | + |
| <i>Pigc</i>     | + | + |
| <i>Pigyl</i>    | + | + |
| <i>Pik3c2a</i>  | + | + |
| <i>Pik3cb</i>   | + | + |
| <i>Pik3r1</i>   | + | + |
| <i>Pik3r3</i>   | + | + |
| <i>Pik3r5</i>   | + | + |
| <i>Pikfyve</i>  | + | + |
| <i>Pin4</i>     | + | + |
| <i>Pip5k1b</i>  | + | + |
| <i>Pip5k1l</i>  | + | + |
| <i>Pisd-ps2</i> | + | + |
| <i>Pitrm1</i>   | + | + |
| <i>Pja1</i>     | + | + |
| <i>Pja2</i>     | + | + |
| <i>Pkd1</i>     | + | + |
| <i>Pkd2l2</i>   | + | + |
| <i>Pkp4</i>     | + | + |
| <i>Pla2g16</i>  | + | + |

|                 |   |   |
|-----------------|---|---|
| <i>Plag1</i>    | + | + |
| <i>Plau</i>     | + | + |
| <i>Plbd2</i>    | + | + |
| <i>Plcb3</i>    | + | + |
| <i>Plcd3</i>    | + | + |
| <i>Plcg1</i>    | + | + |
| <i>Plcg2</i>    | + | + |
| <i>Plcl2</i>    | + | + |
| <i>Pld2</i>     | + | + |
| <i>Pld4</i>     | + | + |
| <i>Plec</i>     | + | + |
| <i>Plekha1</i>  | + | + |
| <i>Plekha4</i>  | + | + |
| <i>Plekha5</i>  | + | + |
| <i>Plekha8</i>  | + | + |
| <i>Plekhf1</i>  | + | + |
| <i>Plekhg3</i>  | + | + |
| <i>Plekhh3</i>  | + | + |
| <i>Plk2</i>     | + | + |
| <i>Pltp</i>     | + | + |
| <i>Plxdc1</i>   | + | + |
| <i>Plxnb1</i>   | + | + |
| <i>Plxnd1</i>   | + | + |
| <i>Pmepa1</i>   | + | + |
| <i>Pnrc1</i>    | + | + |
| <i>Pofut2</i>   | + | + |
| <i>Poglut1</i>  | + | + |
| <i>Pogz</i>     | + | + |
| <i>Pole3</i>    | + | + |
| <i>Polg</i>     | + | + |
| <i>Polr2f</i>   | + | + |
| <i>Polr2h</i>   | + | + |
| <i>Polr2k</i>   | + | + |
| <i>Polr2l</i>   | + | + |
| <i>Polr2m</i>   | + | + |
| <i>Polr3d</i>   | + | + |
| <i>Polr3f</i>   | + | + |
| <i>Polr3gl</i>  | + | + |
| <i>Polr3k</i>   | + | + |
| <i>Pop5</i>     | + | + |
| <i>Pop7</i>     | + | + |
| <i>Pot1a</i>    | + | + |
| <i>Pot1b</i>    | + | + |
| <i>Ppa1</i>     | + | + |
| <i>Ppap2b</i>   | + | + |
| <i>Ppapdc2</i>  | + | + |
| <i>Ppara</i>    | + | + |
| <i>Ppargc1b</i> | + | + |
| <i>Ppfia1</i>   | + | + |
| <i>Ppfia3</i>   | + | + |
| <i>Ppig</i>     | + | + |
| <i>Ppil6</i>    | + | + |
| <i>Ppl</i>      | + | + |

|                  |   |   |
|------------------|---|---|
| <i>Ppm1a</i>     | + | + |
| <i>Ppm1e</i>     | + | + |
| <i>Ppm1l</i>     | + | + |
| <i>Ppp1cb</i>    | + | + |
| <i>Ppp1r11</i>   | + | + |
| <i>Ppp1r12b</i>  | + | + |
| <i>Ppp1r13b</i>  | + | + |
| <i>Ppp1r13l</i>  | + | + |
| <i>Ppp1r14a</i>  | + | + |
| <i>Ppp1r15a</i>  | + | + |
| <i>Ppp1r2</i>    | + | + |
| <i>Ppp1r3e</i>   | + | + |
| <i>Ppp1r9b</i>   | + | + |
| <i>Ppp2r1a</i>   | + | + |
| <i>Ppp2r2a</i>   | + | + |
| <i>Ppp2r5c</i>   | + | + |
| <i>Ppt2</i>      | + | + |
| <i>Prdm1</i>     | + | + |
| <i>Prdm11</i>    | + | + |
| <i>Prdm4</i>     | + | + |
| <i>Prim2</i>     | + | + |
| <i>Prkaa1</i>    | + | + |
| <i>Prkab2</i>    | + | + |
| <i>Prkacb</i>    | + | + |
| <i>Prkag2</i>    | + | + |
| <i>Prkar1a</i>   | + | + |
| <i>Prkca</i>     | + | + |
| <i>Prkce</i>     | + | + |
| <i>Prkcg</i>     | + | + |
| <i>Prkcsb</i>    | + | + |
| <i>Prkra</i>     | + | + |
| <i>Prob1</i>     | + | + |
| <i>Proca1</i>    | + | + |
| <i>Prorsd1</i>   | + | + |
| <i>Prosapip1</i> | + | + |
| <i>Prpf40b</i>   | + | + |
| <i>Prpf4b</i>    | + | + |
| <i>Prpf8</i>     | + | + |
| <i>Prr5</i>      | + | + |
| <i>Prr5l</i>     | + | + |
| <i>Prrc2c</i>    | + | + |
| <i>Prrg4</i>     | + | + |
| <i>Psd</i>       | + | + |
| <i>Psd4</i>      | + | + |
| <i>Psm4</i>      | + | + |
| <i>Psmb3</i>     | + | + |
| <i>Psmc1</i>     | + | + |
| <i>Psmc4</i>     | + | + |
| <i>Psmc6</i>     | + | + |
| <i>Psmd11</i>    | + | + |
| <i>Psmd4</i>     | + | + |
| <i>Psmd5</i>     | + | + |
| <i>Psme4</i>     | + | + |

|                  |   |   |
|------------------|---|---|
| <i>Pstk</i>      | + | + |
| <i>Pstpip2</i>   | + | + |
| <i>Ptch1</i>     | + | + |
| <i>Ptdss2</i>    | + | + |
| <i>Ptger4</i>    | + | + |
| <i>Ptk2</i>      | + | + |
| <i>Ptms</i>      | + | + |
| <i>Ptp4a1</i>    | + | + |
| <i>Ptpla</i>     | + | + |
| <i>Ptplb</i>     | + | + |
| <i>Ptpmt1</i>    | + | + |
| <i>Ptpn12</i>    | + | + |
| <i>Ptpn18</i>    | + | + |
| <i>Ptpn21</i>    | + | + |
| <i>Ptpn3</i>     | + | + |
| <i>Ptpn7</i>     | + | + |
| <i>Ptprs</i>     | + | + |
| <i>Ptprv</i>     | + | + |
| <i>Pttg1</i>     | + | + |
| <i>Pttg1ip</i>   | + | + |
| <i>Puf60</i>     | + | + |
| <i>Pura</i>      | + | + |
| <i>Purg</i>      | + | + |
| <i>Pus3</i>      | + | + |
| <i>Pvr11</i>     | + | + |
| <i>Pvt1</i>      | + | + |
| <i>Pwwwp2b</i>   | + | + |
| <i>Pxdc1</i>     | + | + |
| <i>Pxmp4</i>     | + | + |
| <i>Pxn</i>       | + | + |
| <i>Pycr1</i>     | + | + |
| <i>Pyurf</i>     | + | + |
| <i>Qdpr</i>      | + | + |
| <i>Qpctl</i>     | + | + |
| <i>Qser1</i>     | + | + |
| <i>Qsox1</i>     | + | + |
| <i>R3hdm4</i>    | + | + |
| <i>Rab11fip1</i> | + | + |
| <i>Rab11fip2</i> | + | + |
| <i>Rab11fip3</i> | + | + |
| <i>Rab11fip5</i> | + | + |
| <i>Rab12</i>     | + | + |
| <i>Rab20</i>     | + | + |
| <i>Rab23</i>     | + | + |
| <i>Rab28</i>     | + | + |
| <i>Rab2a</i>     | + | + |
| <i>Rab30</i>     | + | + |
| <i>Rab31</i>     | + | + |
| <i>Rab3d</i>     | + | + |
| <i>Rab5c</i>     | + | + |
| <i>Rab6a</i>     | + | + |
| <i>Rab711</i>    | + | + |
| <i>Rabep1</i>    | + | + |



|                 |   |   |
|-----------------|---|---|
| <i>Rabl2</i>    | + | + |
| <i>Racgap1</i>  | + | + |
| <i>Rad51d</i>   | + | + |
| <i>Rad54l2</i>  | + | + |
| <i>Ralb</i>     | + | + |
| <i>Ralgapa2</i> | + | + |
| <i>Ralgapb</i>  | + | + |
| <i>Ralgds</i>   | + | + |
| <i>Ralgps1</i>  | + | + |
| <i>Raly</i>     | + | + |
| <i>Ranbp10</i>  | + | + |
| <i>Ranbp3</i>   | + | + |
| <i>Ranbp6</i>   | + | + |
| <i>Rangap1</i>  | + | + |
| <i>Rap1b</i>    | + | + |
| <i>Rap2a</i>    | + | + |
| <i>Rap2b</i>    | + | + |
| <i>Rapgef3</i>  | + | + |
| <i>Raph1</i>    | + | + |
| <i>Rara</i>     | + | + |
| <i>Rarg</i>     | + | + |
| <i>Rarres1</i>  | + | + |
| <i>Rasd1</i>    | + | + |
| <i>Rasgef1b</i> | + | + |
| <i>Rasl10a</i>  | + | + |
| <i>Rasl11b</i>  | + | + |
| <i>Rassf1</i>   | + | + |
| <i>Rassf5</i>   | + | + |
| <i>Rb1</i>      | + | + |
| <i>Rbbp8</i>    | + | + |
| <i>Rbm11</i>    | + | + |
| <i>Rbm27</i>    | + | + |
| <i>Rbm28</i>    | + | + |
| <i>Rbm34</i>    | + | + |
| <i>Rbm47</i>    | + | + |
| <i>Rbm6</i>     | + | + |
| <i>Rbm7</i>     | + | + |
| <i>Rbms1</i>    | + | + |
| <i>Rbms2</i>    | + | + |
| <i>Rbpj</i>     | + | + |
| <i>Rbpms</i>    | + | + |
| <i>Rc3h1</i>    | + | + |
| <i>Rcan1</i>    | + | + |
| <i>Rcan3</i>    | + | + |
| <i>Rcbtb1</i>   | + | + |
| <i>Rcl1</i>     | + | + |
| <i>Rcn1</i>     | + | + |
| <i>Rcn2</i>     | + | + |
| <i>Rcor2</i>    | + | + |
| <i>Rdx</i>      | + | + |
| <i>Reep4</i>    | + | + |
| <i>Reep5</i>    | + | + |
| <i>Repin1</i>   | + | + |

|                |   |   |
|----------------|---|---|
| <i>Rere</i>    | + | + |
| <i>Rfesd</i>   | + | + |
| <i>Rfk</i>     | + | + |
| <i>Rfwd3</i>   | + | + |
| <i>Rfx3</i>    | + | + |
| <i>Rgcc</i>    | + | + |
| <i>Rgmb</i>    | + | + |
| <i>Rgs10</i>   | + | + |
| <i>Rgs11</i>   | + | + |
| <i>Rgs12</i>   | + | + |
| <i>Rgs9bp</i>  | + | + |
| <i>Rhbdd1</i>  | + | + |
| <i>Rhbdd2</i>  | + | + |
| <i>Rhbdf1</i>  | + | + |
| <i>Rhbdl3</i>  | + | + |
| <i>Rhbg</i>    | + | + |
| <i>Rhob</i>    | + | + |
| <i>Rhot1</i>   | + | + |
| <i>Rhov</i>    | + | + |
| <i>Rhpn2</i>   | + | + |
| <i>Rictor</i>  | + | + |
| <i>Rif1</i>    | + | + |
| <i>Rimbp3</i>  | + | + |
| <i>Rin3</i>    | + | + |
| <i>Ripk3</i>   | + | + |
| <i>Ripply3</i> | + | + |
| <i>Rlim</i>    | + | + |
| <i>Rmdn1</i>   | + | + |
| <i>Rmdn3</i>   | + | + |
| <i>Rmnd5a</i>  | + | + |
| <i>Rnase12</i> | + | + |
| <i>Rnd2</i>    | + | + |
| <i>Rnf103</i>  | + | + |
| <i>Rnf11</i>   | + | + |
| <i>Rnf130</i>  | + | + |
| <i>Rnf14</i>   | + | + |
| <i>Rnf144a</i> | + | + |
| <i>Rnf146</i>  | + | + |
| <i>Rnf149</i>  | + | + |
| <i>Rnf169</i>  | + | + |
| <i>Rnf19a</i>  | + | + |
| <i>Rnf2</i>    | + | + |
| <i>Rnf219</i>  | + | + |
| <i>Rnf7</i>    | + | + |
| <i>Rnft1</i>   | + | + |
| <i>Rnls</i>    | + | + |
| <i>Rock1</i>   | + | + |
| <i>Rock2</i>   | + | + |
| <i>Rpap1</i>   | + | + |
| <i>Rpe</i>     | + | + |
| <i>Rpf1</i>    | + | + |
| <i>Rpl10a</i>  | + | + |
| <i>Rpl11</i>   | + | + |

|                |   |   |
|----------------|---|---|
| <i>Rpl17</i>   | + | + |
| <i>Rpl18a</i>  | + | + |
| <i>Rpl19</i>   | + | + |
| <i>Rpl22</i>   | + | + |
| <i>Rpl23a</i>  | + | + |
| <i>Rpl26</i>   | + | + |
| <i>Rpl27</i>   | + | + |
| <i>Rpl3</i>    | + | + |
| <i>Rpl31</i>   | + | + |
| <i>Rpl35a</i>  | + | + |
| <i>Rpl38</i>   | + | + |
| <i>Rpl5</i>    | + | + |
| <i>Rpl6</i>    | + | + |
| <i>Rpn1</i>    | + | + |
| <i>Rpp21</i>   | + | + |
| <i>Rpp30</i>   | + | + |
| <i>Rpp38</i>   | + | + |
| <i>Rpp40</i>   | + | + |
| <i>Rps15</i>   | + | + |
| <i>Rps17</i>   | + | + |
| <i>Rps19</i>   | + | + |
| <i>Rps20</i>   | + | + |
| <i>Rps26</i>   | + | + |
| <i>Rps27l</i>  | + | + |
| <i>Rps29</i>   | + | + |
| <i>Rps3</i>    | + | + |
| <i>Rps6ka3</i> | + | + |
| <i>Rps6kc1</i> | + | + |
| <i>Rptor</i>   | + | + |
| <i>Rpusd2</i>  | + | + |
| <i>Rraga</i>   | + | + |
| <i>Rragb</i>   | + | + |
| <i>Rras</i>    | + | + |
| <i>Rreb1</i>   | + | + |
| <i>Rsph9</i>   | + | + |
| <i>Rsrc1</i>   | + | + |
| <i>Rtel1</i>   | + | + |
| <i>Rtf1</i>    | + | + |
| <i>Rtkn2</i>   | + | + |
| <i>Rttn</i>    | + | + |
| <i>Rufy4</i>   | + | + |
| <i>Rundc3b</i> | + | + |
| <i>Rusc1</i>   | + | + |
| <i>Rwdd2b</i>  | + | + |
| <i>Rybp</i>    | + | + |
| <i>S100a1</i>  | + | + |
| <i>S100a13</i> | + | + |
| <i>S1pr1</i>   | + | + |
| <i>Saal1</i>   | + | + |
| <i>Sae1</i>    | + | + |
| <i>Sap130</i>  | + | + |
| <i>Sap30l</i>  | + | + |
| <i>Sarm1</i>   | + | + |

|                  |   |   |
|------------------|---|---|
| <i>Satb1</i>     | + | + |
| <i>Saysd1</i>    | + | + |
| <i>Scaf1</i>     | + | + |
| <i>Scamp4</i>    | + | + |
| <i>Scarna2</i>   | + | + |
| <i>Sccpdh</i>    | + | + |
| <i>Sco2</i>      | + | + |
| <i>Scoc</i>      | + | + |
| <i>Scpep1</i>    | + | + |
| <i>Scrn2</i>     | + | + |
| <i>Scyl2</i>     | + | + |
| <i>Sdc1</i>      | + | + |
| <i>Sdc4</i>      | + | + |
| <i>Sdcbp</i>     | + | + |
| <i>Sdhc</i>      | + | + |
| <i>Sdr39u1</i>   | + | + |
| <i>Sec11a</i>    | + | + |
| <i>Sec13</i>     | + | + |
| <i>Sec22a</i>    | + | + |
| <i>Sec22c</i>    | + | + |
| <i>Sec23b</i>    | + | + |
| <i>Sec23ip</i>   | + | + |
| <i>Sec24c</i>    | + | + |
| <i>Sec24d</i>    | + | + |
| <i>Sec31b</i>    | + | + |
| <i>Sec61a2</i>   | + | + |
| <i>Sec62</i>     | + | + |
| <i>Sec63</i>     | + | + |
| <i>Secisbp2l</i> | + | + |
| <i>Sel1l</i>     | + | + |
| <i>Selm</i>      | + | + |
| <i>Sema4c</i>    | + | + |
| <i>Sema6b</i>    | + | + |
| <i>Sema6c</i>    | + | + |
| <i>Senp3</i>     | + | + |
| <i>Senp8</i>     | + | + |
| <i>Sephs1</i>    | + | + |
| <i>Sepsecs</i>   | + | + |
| <i>Sept10</i>    | + | + |
| <i>Sept9</i>     | + | + |
| <i>Sepw1</i>     | + | + |
| <i>Serf1</i>     | + | + |
| <i>Sergef</i>    | + | + |
| <i>Serinc1</i>   | + | + |
| <i>Serinc5</i>   | + | + |
| <i>Serpinb6a</i> | + | + |
| <i>Serpini1</i>  | + | + |
| <i>Sesn1</i>     | + | + |
| <i>Sesn2</i>     | + | + |
| <i>Setbp1</i>    | + | + |
| <i>Setd4</i>     | + | + |
| <i>Setd7</i>     | + | + |
| <i>Setmar</i>    | + | + |

|                 |   |   |
|-----------------|---|---|
| <i>Setx</i>     | + | + |
| <i>Sf3b2</i>    | + | + |
| <i>Sfr1</i>     | + | + |
| <i>Sfswap</i>   | + | + |
| <i>Sfxn1</i>    | + | + |
| <i>Sfxn3</i>    | + | + |
| <i>Sfxn5</i>    | + | + |
| <i>Sgcb</i>     | + | + |
| <i>Sgk1</i>     | + | + |
| <i>Sgms1</i>    | + | + |
| <i>Sgpl1</i>    | + | + |
| <i>Sgsm3</i>    | + | + |
| <i>Sgtb</i>     | + | + |
| <i>Sh2d5</i>    | + | + |
| <i>Sh3bgrl2</i> | + | + |
| <i>Sh3rf1</i>   | + | + |
| <i>Sh3yl1</i>   | + | + |
| <i>Shf</i>      | + | + |
| <i>Shfm1</i>    | + | + |
| <i>Shmt1</i>    | + | + |
| <i>Shmt2</i>    | + | + |
| <i>Shox2</i>    | + | + |
| <i>Shprh</i>    | + | + |
| <i>Shq1</i>     | + | + |
| <i>Siae</i>     | + | + |
| <i>Siah1a</i>   | + | + |
| <i>Sidt1</i>    | + | + |
| <i>Sigmar1</i>  | + | + |
| <i>Sik2</i>     | + | + |
| <i>Sike1</i>    | + | + |
| <i>Simc1</i>    | + | + |
| <i>Sirt6</i>    | + | + |
| <i>Six5</i>     | + | + |
| <i>Skap2</i>    | + | + |
| <i>Skida1</i>   | + | + |
| <i>Slain2</i>   | + | + |
| <i>Slc11a2</i>  | + | + |
| <i>Slc12a4</i>  | + | + |
| <i>Slc12a9</i>  | + | + |
| <i>Slc16a10</i> | + | + |
| <i>Slc16a13</i> | + | + |
| <i>Slc16a3</i>  | + | + |
| <i>Slc18a1</i>  | + | + |
| <i>Slc19a2</i>  | + | + |
| <i>Slc22a15</i> | + | + |
| <i>Slc22a17</i> | + | + |
| <i>Slc23a2</i>  | + | + |
| <i>Slc25a23</i> | + | + |
| <i>Slc25a27</i> | + | + |
| <i>Slc25a30</i> | + | + |
| <i>Slc25a33</i> | + | + |
| <i>Slc25a35</i> | + | + |
| <i>Slc25a4</i>  | + | + |

|                 |   |   |
|-----------------|---|---|
| <i>Slc25a44</i> | + | + |
| <i>Slc25a46</i> | + | + |
| <i>Slc26a2</i>  | + | + |
| <i>Slc27a4</i>  | + | + |
| <i>Slc29a1</i>  | + | + |
| <i>Slc2a8</i>   | + | + |
| <i>Slc30a4</i>  | + | + |
| <i>Slc30a5</i>  | + | + |
| <i>Slc33a1</i>  | + | + |
| <i>Slc35a1</i>  | + | + |
| <i>Slc35a3</i>  | + | + |
| <i>Slc35e4</i>  | + | + |
| <i>Slc35f5</i>  | + | + |
| <i>Slc35f6</i>  | + | + |
| <i>Slc36a1</i>  | + | + |
| <i>Slc36a4</i>  | + | + |
| <i>Slc38a2</i>  | + | + |
| <i>Slc39a14</i> | + | + |
| <i>Slc39a8</i>  | + | + |
| <i>Slc43a1</i>  | + | + |
| <i>Slc44a1</i>  | + | + |
| <i>Slc4a11</i>  | + | + |
| <i>Slc4a8</i>   | + | + |
| <i>Slc50a1</i>  | + | + |
| <i>Slc5a3</i>   | + | + |
| <i>Slc6a9</i>   | + | + |
| <i>Slc7a4</i>   | + | + |
| <i>Slc9a1</i>   | + | + |
| <i>Slc9a5</i>   | + | + |
| <i>Slco5a1</i>  | + | + |
| <i>Slmap</i>    | + | + |
| <i>Slmo1</i>    | + | + |
| <i>Slu7</i>     | + | + |
| <i>Smad1</i>    | + | + |
| <i>Smad3</i>    | + | + |
| <i>Smad5</i>    | + | + |
| <i>Smad6</i>    | + | + |
| <i>Smad7</i>    | + | + |
| <i>Smarca2</i>  | + | + |
| <i>Smarcad1</i> | + | + |
| <i>Smarcal1</i> | + | + |
| <i>Smc3</i>     | + | + |
| <i>Smcr7</i>    | + | + |
| <i>Smg7</i>     | + | + |
| <i>Smim12</i>   | + | + |
| <i>Smim13</i>   | + | + |
| <i>Smim4</i>    | + | + |
| <i>Smim7</i>    | + | + |
| <i>Smim8</i>    | + | + |
| <i>Smpd2</i>    | + | + |
| <i>Smpd5</i>    | + | + |
| <i>Smpdl3a</i>  | + | + |
| <i>Smpdl3b</i>  | + | + |

|                 |   |   |
|-----------------|---|---|
| <i>Smu1</i>     | + | + |
| <i>Smug1</i>    | + | + |
| <i>Smurf1</i>   | + | + |
| <i>Smyd5</i>    | + | + |
| <i>Snap23</i>   | + | + |
| <i>Snapc3</i>   | + | + |
| <i>Snf8</i>     | + | + |
| <i>Snhg4</i>    | + | + |
| <i>Snora68</i>  | + | + |
| <i>Snord15a</i> | + | + |
| <i>Snord42a</i> | + | + |
| <i>Snord42b</i> | + | + |
| <i>Snord43</i>  | + | + |
| <i>Snord4a</i>  | + | + |
| <i>Snord58b</i> | + | + |
| <i>Snrk</i>     | + | + |
| <i>Snrnp48</i>  | + | + |
| <i>Snrnp70</i>  | + | + |
| <i>Snrpb</i>    | + | + |
| <i>Snrpb2</i>   | + | + |
| <i>Snrpc</i>    | + | + |
| <i>Snrpd2</i>   | + | + |
| <i>Sntb2</i>    | + | + |
| <i>Snw1</i>     | + | + |
| <i>Snx10</i>    | + | + |
| <i>Snx12</i>    | + | + |
| <i>Snx16</i>    | + | + |
| <i>Snx21</i>    | + | + |
| <i>Snx22</i>    | + | + |
| <i>Snx24</i>    | + | + |
| <i>Snx27</i>    | + | + |
| <i>Snx33</i>    | + | + |
| <i>Socs5</i>    | + | + |
| <i>Socs6</i>    | + | + |
| <i>Sord</i>     | + | + |
| <i>Sowahc</i>   | + | + |
| <i>Sox12</i>    | + | + |
| <i>Sox8</i>     | + | + |
| <i>Spa17</i>    | + | + |
| <i>Spag4</i>    | + | + |
| <i>Spag9</i>    | + | + |
| <i>Spata13</i>  | + | + |
| <i>Spata17</i>  | + | + |
| <i>Spata18</i>  | + | + |
| <i>Spata32</i>  | + | + |
| <i>Spata5l1</i> | + | + |
| <i>Spata7</i>   | + | + |
| <i>Spats1</i>   | + | + |
| <i>Spcs2</i>    | + | + |
| <i>Spdl1</i>    | + | + |
| <i>Spdya</i>    | + | + |
| <i>Spg11</i>    | + | + |
| <i>Spice1</i>   | + | + |

|                   |   |   |
|-------------------|---|---|
| <i>Spint2</i>     | + | + |
| <i>Spop</i>       | + | + |
| <i>Sppl2a</i>     | + | + |
| <i>Spred1</i>     | + | + |
| <i>Spred2</i>     | + | + |
| <i>Spred3</i>     | + | + |
| <i>Spry2</i>      | + | + |
| <i>Spry4</i>      | + | + |
| <i>Spryd3</i>     | + | + |
| <i>Spryd4</i>     | + | + |
| <i>Spryd7</i>     | + | + |
| <i>Spsb1</i>      | + | + |
| <i>Sptb</i>       | + | + |
| <i>Sptbn4</i>     | + | + |
| <i>Sptlc2</i>     | + | + |
| <i>Spty2d1</i>    | + | + |
| <i>Srd5a1</i>     | + | + |
| <i>Srms</i>       | + | + |
| <i>Srpk1</i>      | + | + |
| <i>Srrm1</i>      | + | + |
| <i>Srsf10</i>     | + | + |
| <i>Srsf6</i>      | + | + |
| <i>Ssb</i>        | + | + |
| <i>Ssbp1</i>      | + | + |
| <i>Ssbp2</i>      | + | + |
| <i>Ssh1</i>       | + | + |
| <i>Ssr2</i>       | + | + |
| <i>Ssr3</i>       | + | + |
| <i>Ssrp1</i>      | + | + |
| <i>Sssca1</i>     | + | + |
| <i>Ssx2ip</i>     | + | + |
| <i>St14</i>       | + | + |
| <i>St3gal4</i>    | + | + |
| <i>St3gal6</i>    | + | + |
| <i>St6galnac3</i> | + | + |
| <i>St6galnac4</i> | + | + |
| <i>St8sia6</i>    | + | + |
| <i>Stac2</i>      | + | + |
| <i>Stam</i>       | + | + |
| <i>Stampb</i>     | + | + |
| <i>Stampb1</i>    | + | + |
| <i>Stard10</i>    | + | + |
| <i>Stard3</i>     | + | + |
| <i>Stat5a</i>     | + | + |
| <i>Stat5b</i>     | + | + |
| <i>Stat6</i>      | + | + |
| <i>Stau1</i>      | + | + |
| <i>Stau2</i>      | + | + |
| <i>Stbd1</i>      | + | + |
| <i>Steap3</i>     | + | + |
| <i>Stk11ip</i>    | + | + |
| <i>Stk16</i>      | + | + |
| <i>Stk24</i>      | + | + |



|                 |   |   |
|-----------------|---|---|
| <i>Stk30</i>    | + | + |
| <i>Stk32c</i>   | + | + |
| <i>Stmn1</i>    | + | + |
| <i>Stom</i>     | + | + |
| <i>Stoml1</i>   | + | + |
| <i>Stox1</i>    | + | + |
| <i>Stpg2</i>    | + | + |
| <i>Strap</i>    | + | + |
| <i>Strip1</i>   | + | + |
| <i>Strip2</i>   | + | + |
| <i>Stx16</i>    | + | + |
| <i>Stx17</i>    | + | + |
| <i>Stx18</i>    | + | + |
| <i>Stx1a</i>    | + | + |
| <i>Stx6</i>     | + | + |
| <i>Stxbp1</i>   | + | + |
| <i>Stxbp3a</i>  | + | + |
| <i>Styxl1</i>   | + | + |
| <i>Sub1</i>     | + | + |
| <i>Suco</i>     | + | + |
| <i>Supt3</i>    | + | + |
| <i>Supt5</i>    | + | + |
| <i>Susd1</i>    | + | + |
| <i>Suv420h1</i> | + | + |
| <i>Swsap1</i>   | + | + |
| <i>Sympk</i>    | + | + |
| <i>Syncrip</i>  | + | + |
| <i>Syne1</i>    | + | + |
| <i>Syne2</i>    | + | + |
| <i>Syng1</i>    | + | + |
| <i>Synj1</i>    | + | + |
| <i>Synj2bp</i>  | + | + |
| <i>Tab3</i>     | + | + |
| <i>Tacc1</i>    | + | + |
| <i>Tada2a</i>   | + | + |
| <i>Tada2b</i>   | + | + |
| <i>Taf13</i>    | + | + |
| <i>Taf15</i>    | + | + |
| <i>Taf3</i>     | + | + |
| <i>Taf4b</i>    | + | + |
| <i>Taf7</i>     | + | + |
| <i>Taldo1</i>   | + | + |
| <i>Tamm41</i>   | + | + |
| <i>Tanc1</i>    | + | + |
| <i>Tango2</i>   | + | + |
| <i>Taok1</i>    | + | + |
| <i>Tapbp</i>    | + | + |
| <i>Tars</i>     | + | + |
| <i>Tarsl2</i>   | + | + |
| <i>Tasp1</i>    | + | + |
| <i>Tatdn3</i>   | + | + |
| <i>Tax1bp3</i>  | + | + |
| <i>Tbc1d12</i>  | + | + |

|                 |   |   |
|-----------------|---|---|
| <i>Tbc1d14</i>  | + | + |
| <i>Tbc1d19</i>  | + | + |
| <i>Tbc1d2</i>   | + | + |
| <i>Tbc1d22b</i> | + | + |
| <i>Tbc1d23</i>  | + | + |
| <i>Tbc1d4</i>   | + | + |
| <i>Tbc1d9</i>   | + | + |
| <i>Tbc1d9b</i>  | + | + |
| <i>Tbca</i>     | + | + |
| <i>Tbcd</i>     | + | + |
| <i>Tbcel</i>    | + | + |
| <i>Tbl2</i>     | + | + |
| <i>Tbrg1</i>    | + | + |
| <i>Tbx21</i>    | + | + |
| <i>Tcaim</i>    | + | + |
| <i>Tcea2</i>    | + | + |
| <i>Tceb3</i>    | + | + |
| <i>Tcf12</i>    | + | + |
| <i>Tcf712</i>   | + | + |
| <i>Tcp11</i>    | + | + |
| <i>Tcp1111</i>  | + | + |
| <i>Tcp1112</i>  | + | + |
| <i>Tctex1d2</i> | + | + |
| <i>Tctn3</i>    | + | + |
| <i>Tead3</i>    | + | + |
| <i>Tef</i>      | + | + |
| <i>Telo2</i>    | + | + |
| <i>Terc</i>     | + | + |
| <i>Tesc</i>     | + | + |
| <i>Tex2</i>     | + | + |
| <i>Tfap2a</i>   | + | + |
| <i>Tfap4</i>    | + | + |
| <i>Tfdp2</i>    | + | + |
| <i>Tfg</i>      | + | + |
| <i>Tgds</i>     | + | + |
| <i>Tgfb3</i>    | + | + |
| <i>Tha1</i>     | + | + |
| <i>Thap3</i>    | + | + |
| <i>Thbs3</i>    | + | + |
| <i>Them4</i>    | + | + |
| <i>Thg11</i>    | + | + |
| <i>Thnsl1</i>   | + | + |
| <i>Thoc1</i>    | + | + |
| <i>Thoc6</i>    | + | + |
| <i>Thra</i>     | + | + |
| <i>Thtpa</i>    | + | + |
| <i>Thyn1</i>    | + | + |
| <i>Tia1</i>     | + | + |
| <i>Tial1</i>    | + | + |
| <i>Tifa</i>     | + | + |
| <i>Timm10</i>   | + | + |
| <i>Timm17a</i>  | + | + |
| <i>Timm21</i>   | + | + |

|                 |   |   |
|-----------------|---|---|
| <i>Timm22</i>   | + | + |
| <i>Tiparp</i>   | + | + |
| <i>Tjap1</i>    | + | + |
| <i>Tjp2</i>     | + | + |
| <i>Tle1</i>     | + | + |
| <i>Tle3</i>     | + | + |
| <i>Tle4</i>     | + | + |
| <i>Tlr2</i>     | + | + |
| <i>Tm2d1</i>    | + | + |
| <i>Tm6sf1</i>   | + | + |
| <i>Tm9sf4</i>   | + | + |
| <i>Tma16</i>    | + | + |
| <i>Tmbim4</i>   | + | + |
| <i>Tmcc3</i>    | + | + |
| <i>Tmco6</i>    | + | + |
| <i>Tmed2</i>    | + | + |
| <i>Tmed3</i>    | + | + |
| <i>Tmed4</i>    | + | + |
| <i>Tmed9</i>    | + | + |
| <i>Tmeff1</i>   | + | + |
| <i>Tmem100</i>  | + | + |
| <i>Tmem108</i>  | + | + |
| <i>Tmem109</i>  | + | + |
| <i>Tmem115</i>  | + | + |
| <i>Tmem116</i>  | + | + |
| <i>Tmem121</i>  | + | + |
| <i>Tmem126a</i> | + | + |
| <i>Tmem126b</i> | + | + |
| <i>Tmem154</i>  | + | + |
| <i>Tmem158</i>  | + | + |
| <i>Tmem161b</i> | + | + |
| <i>Tmem165</i>  | + | + |
| <i>Tmem167b</i> | + | + |
| <i>Tmem169</i>  | + | + |
| <i>Tmem171</i>  | + | + |
| <i>Tmem180</i>  | + | + |
| <i>Tmem184c</i> | + | + |
| <i>Tmem189</i>  | + | + |
| <i>Tmem191c</i> | + | + |
| <i>Tmem192</i>  | + | + |
| <i>Tmem198</i>  | + | + |
| <i>Tmem198b</i> | + | + |
| <i>Tmem2</i>    | + | + |
| <i>Tmem205</i>  | + | + |
| <i>Tmem209</i>  | + | + |
| <i>Tmem217</i>  | + | + |
| <i>Tmem221</i>  | + | + |
| <i>Tmem222</i>  | + | + |
| <i>Tmem229b</i> | + | + |
| <i>Tmem25</i>   | + | + |
| <i>Tmem253</i>  | + | + |
| <i>Tmem255a</i> | + | + |
| <i>Tmem256</i>  | + | + |

|                             |   |   |
|-----------------------------|---|---|
| <i>Tmem259</i>              | + | + |
| <i>Tmem33</i>               | + | + |
| <i>Tmem38a</i>              | + | + |
| <i>Tmem38b</i>              | + | + |
| <i>Tmem39a</i>              | + | + |
| <i>Tmem41a</i>              | + | + |
| <i>Tmem41b</i>              | + | + |
| <i>Tmem50b</i>              | + | + |
| <i>Tmem51</i>               | + | + |
| <i>Tmem51as1</i>            | + | + |
| <i>Tmem53</i>               | + | + |
| <i>Tmem57</i>               | + | + |
| <i>Tmem63b</i>              | + | + |
| <i>Tmem64</i>               | + | + |
| <i>Tmem65</i>               | + | + |
| <i>Tmem66</i>               | + | + |
| <i>Tmem8</i>                | + | + |
| <i>Tmem86a</i>              | + | + |
| <i>Tmem87b</i>              | + | + |
| <i>Tmem8b</i>               | + | + |
| <i>Tmem9</i>                | + | + |
| <i>Tmod3</i>                | + | + |
| <i>Tmtc1</i>                | + | + |
| <i>Tmx1</i>                 | + | + |
| <i>Tmx4</i>                 | + | + |
| <i>Tnfai<sub>p</sub>8I1</i> | + | + |
| <i>Tnfai<sub>p</sub>8I2</i> | + | + |
| <i>Tnfrsf12a</i>            | + | + |
| <i>Tnfrsf21</i>             | + | + |
| <i>Tnks</i>                 | + | + |
| <i>Tnnc1</i>                | + | + |
| <i>Tnpo3</i>                | + | + |
| <i>Tnrc18</i>               | + | + |
| <i>Tnrc6c</i>               | + | + |
| <i>Tns1</i>                 | + | + |
| <i>Tns3</i>                 | + | + |
| <i>Tob1</i>                 | + | + |
| <i>Tollip</i>               | + | + |
| <i>Tomm5</i>                | + | + |
| <i>Tomm6</i>                | + | + |
| <i>Tomm70a</i>              | + | + |
| <i>Tpcn1</i>                | + | + |
| <i>Tpm1</i>                 | + | + |
| <i>Tpm3</i>                 | + | + |
| <i>Tpmt</i>                 | + | + |
| <i>Tppp</i>                 | + | + |
| <i>Tpst1</i>                | + | + |
| <i>Tradd</i>                | + | + |
| <i>Traf3ip1</i>             | + | + |
| <i>Traf6</i>                | + | + |
| <i>Trafd1</i>               | + | + |
| <i>Tram2</i>                | + | + |
| <i>Trappc1</i>              | + | + |

|                  |   |   |
|------------------|---|---|
| <i>Trappc5</i>   | + | + |
| <i>Trappc9</i>   | + | + |
| <i>Trerf1</i>    | + | + |
| <i>Trib1</i>     | + | + |
| <i>Trim2</i>     | + | + |
| <i>Trim26</i>    | + | + |
| <i>Trim27</i>    | + | + |
| <i>Trim28</i>    | + | + |
| <i>Trim3</i>     | + | + |
| <i>Trim36</i>    | + | + |
| <i>Trim45</i>    | + | + |
| <i>Trim59</i>    | + | + |
| <i>Trim7</i>     | + | + |
| <i>Triobp</i>    | + | + |
| <i>Trip10</i>    | + | + |
| <i>Trmt44</i>    | + | + |
| <i>Trmt61a</i>   | + | + |
| <i>Trmt61b</i>   | + | + |
| <i>Trnt1</i>     | + | + |
| <i>Troap</i>     | + | + |
| <i>Trove2</i>    | + | + |
| <i>Trp53bp1</i>  | + | + |
| <i>Trp53bp2</i>  | + | + |
| <i>Trp53i13</i>  | + | + |
| <i>Trp53inp2</i> | + | + |
| <i>Trp53rk</i>   | + | + |
| <i>Trp73</i>     | + | + |
| <i>Trpm4</i>     | + | + |
| <i>Trps1</i>     | + | + |
| <i>Ttrap</i>     | + | + |
| <i>Tsc1</i>      | + | + |
| <i>Tsc22d3</i>   | + | + |
| <i>Tsc22d4</i>   | + | + |
| <i>Tsen15</i>    | + | + |
| <i>Tsga10</i>    | + | + |
| <i>Tsga14</i>    | + | + |
| <i>Tsnaxip1</i>  | + | + |
| <i>Tspan17</i>   | + | + |
| <i>Tspan2</i>    | + | + |
| <i>Tspan3</i>    | + | + |
| <i>Tspan31</i>   | + | + |
| <i>Tspan33</i>   | + | + |
| <i>Tspan4</i>    | + | + |
| <i>Tspan5</i>    | + | + |
| <i>Tspyl1</i>    | + | + |
| <i>Tspyl2</i>    | + | + |
| <i>Tspyl5</i>    | + | + |
| <i>Tsta3</i>     | + | + |
| <i>Ttbk2</i>     | + | + |
| <i>Ttc1</i>      | + | + |
| <i>Ttc14</i>     | + | + |
| <i>Ttc23</i>     | + | + |
| <i>Ttc25</i>     | + | + |

|                 |   |   |
|-----------------|---|---|
| <i>Ttc27</i>    | + | + |
| <i>Ttc30b</i>   | + | + |
| <i>Ttc38</i>    | + | + |
| <i>Ttc39b</i>   | + | + |
| <i>Ttc5</i>     | + | + |
| <i>Ttc8</i>     | + | + |
| <i>Ttf1</i>     | + | + |
| <i>Tti2</i>     | + | + |
| <i>Ttl</i>      | + | + |
| <i>Ttl19</i>    | + | + |
| <i>Ttyh2</i>    | + | + |
| <i>Tuba4a</i>   | + | + |
| <i>Tubb2b</i>   | + | + |
| <i>Tulp4</i>    | + | + |
| <i>Twf1</i>     | + | + |
| <i>Twistnb</i>  | + | + |
| <i>Tymp</i>     | + | + |
| <i>U2af2</i>    | + | + |
| <i>Uba6</i>     | + | + |
| <i>Ubash3b</i>  | + | + |
| <i>Ube2cbp</i>  | + | + |
| <i>Ube2d1</i>   | + | + |
| <i>Ube2d2a</i>  | + | + |
| <i>Ube2e3</i>   | + | + |
| <i>Ube2i</i>    | + | + |
| <i>Ube2j2</i>   | + | + |
| <i>Ube2l3</i>   | + | + |
| <i>Ube2m</i>    | + | + |
| <i>Ube2r2</i>   | + | + |
| <i>Ube2t</i>    | + | + |
| <i>Ube2w</i>    | + | + |
| <i>Ube3c</i>    | + | + |
| <i>Ube4a</i>    | + | + |
| <i>Ubn2</i>     | + | + |
| <i>Ubox5</i>    | + | + |
| <i>Ubqln1</i>   | + | + |
| <i>Ubr2</i>     | + | + |
| <i>Ubr3</i>     | + | + |
| <i>Ubt2</i>     | + | + |
| <i>Ubtf</i>     | + | + |
| <i>Uchl5</i>    | + | + |
| <i>Uck2</i>     | + | + |
| <i>Uevld</i>    | + | + |
| <i>Ufc1</i>     | + | + |
| <i>Ufl1</i>     | + | + |
| <i>Ufsp1</i>    | + | + |
| <i>Ugdh</i>     | + | + |
| <i>Uhmk1</i>    | + | + |
| <i>Uhrf1bp1</i> | + | + |
| <i>Umps</i>     | + | + |
| <i>Unc119b</i>  | + | + |
| <i>Unc13b</i>   | + | + |
| <i>Unc5b</i>    | + | + |

|                 |   |   |
|-----------------|---|---|
| <i>Unk</i>      | + | + |
| <i>Uqcc</i>     | + | + |
| <i>Uqcrc2</i>   | + | + |
| <i>Usp1</i>     | + | + |
| <i>Usp15</i>    | + | + |
| <i>Usp16</i>    | + | + |
| <i>Usp18</i>    | + | + |
| <i>Usp2</i>     | + | + |
| <i>Usp22</i>    | + | + |
| <i>Usp25</i>    | + | + |
| <i>Usp27x</i>   | + | + |
| <i>Usp36</i>    | + | + |
| <i>Usp40</i>    | + | + |
| <i>Usp44</i>    | + | + |
| <i>Usp47</i>    | + | + |
| <i>Usp51</i>    | + | + |
| <i>Usp53</i>    | + | + |
| <i>Usp8</i>     | + | + |
| <i>Utp14a</i>   | + | + |
| <i>Utp18</i>    | + | + |
| <i>Utp23</i>    | + | + |
| <i>Utp6</i>     | + | + |
| <i>Uxs1</i>     | + | + |
| <i>Vac14</i>    | + | + |
| <i>Vamp1</i>    | + | + |
| <i>Vamp4</i>    | + | + |
| <i>Vangl2</i>   | + | + |
| <i>Vapa</i>     | + | + |
| <i>Vat1</i>     | + | + |
| <i>Vaultrc5</i> | + | + |
| <i>Vav3</i>     | + | + |
| <i>Vbp1</i>     | + | + |
| <i>Vcl</i>      | + | + |
| <i>Vdac1</i>    | + | + |
| <i>Vdr</i>      | + | + |
| <i>Vim</i>      | + | + |
| <i>Vkorc1</i>   | + | + |
| <i>Vkorc11</i>  | + | + |
| <i>Vopp1</i>    | + | + |
| <i>Vpreb1</i>   | + | + |
| <i>Vps13a</i>   | + | + |
| <i>Vps25</i>    | + | + |
| <i>Vps26b</i>   | + | + |
| <i>Vps36</i>    | + | + |
| <i>Vps37b</i>   | + | + |
| <i>Vps37c</i>   | + | + |
| <i>Vps41</i>    | + | + |
| <i>Vps4a</i>    | + | + |
| <i>Vps8</i>     | + | + |
| <i>Vrk1</i>     | + | + |
| <i>Vsig10</i>   | + | + |
| <i>Vtn</i>      | + | + |
| <i>Wars2</i>    | + | + |

|               |   |   |
|---------------|---|---|
| <i>Wasf1</i>  | + | + |
| <i>Wasl</i>   | + | + |
| <i>Wdr1</i>   | + | + |
| <i>Wdr12</i>  | + | + |
| <i>Wdr19</i>  | + | + |
| <i>Wdr20a</i> | + | + |
| <i>Wdr24</i>  | + | + |
| <i>Wdr34</i>  | + | + |
| <i>Wdr35</i>  | + | + |
| <i>Wdr36</i>  | + | + |
| <i>Wdr4</i>   | + | + |
| <i>Wdr47</i>  | + | + |
| <i>Wdr54</i>  | + | + |
| <i>Wdr7</i>   | + | + |
| <i>Wdr74</i>  | + | + |
| <i>Wdr8</i>   | + | + |
| <i>Wdr93</i>  | + | + |
| <i>Wdtd1</i>  | + | + |
| <i>Whrn</i>   | + | + |
| <i>Wif1</i>   | + | + |
| <i>Wipi1</i>  | + | + |
| <i>Wipi2</i>  | + | + |
| <i>Wls</i>    | + | + |
| <i>Wrb</i>    | + | + |
| <i>Wrn</i>    | + | + |
| <i>Wrnip1</i> | + | + |
| <i>Wsb1</i>   | + | + |
| <i>Wsb2</i>   | + | + |
| <i>Xist</i>   | + | + |
| <i>Xpa</i>    | + | + |
| <i>Xrra1</i>  | + | + |
| <i>Xylt1</i>  | + | + |
| <i>Yae1d1</i> | + | + |
| <i>Yars2</i>  | + | + |
| <i>Yes1</i>   | + | + |
| <i>Yif1a</i>  | + | + |
| <i>Yipf1</i>  | + | + |
| <i>Yipf4</i>  | + | + |
| <i>Yipf5</i>  | + | + |
| <i>Yipf6</i>  | + | + |
| <i>Ylpm1</i>  | + | + |
| <i>Ypel1</i>  | + | + |
| <i>Ypel2</i>  | + | + |
| <i>Ypel5</i>  | + | + |
| <i>Ythdf3</i> | + | + |
| <i>Ywhab</i>  | + | + |
| <i>Zbtb1</i>  | + | + |
| <i>Zbtb17</i> | + | + |
| <i>Zbtb18</i> | + | + |
| <i>Zbtb21</i> | + | + |
| <i>Zbtb22</i> | + | + |
| <i>Zbtb24</i> | + | + |
| <i>Zbtb25</i> | + | + |



|         |   |   |
|---------|---|---|
| Zbtb39  | + | + |
| Zbtb41  | + | + |
| Zbtb42  | + | + |
| Zbtb43  | + | + |
| Zbtb45  | + | + |
| Zbtb7b  | + | + |
| Zbtb7c  | + | + |
| Zbtb8a  | + | + |
| Zc2hc1a | + | + |
| Zc3h12c | + | + |
| Zc3h13  | + | + |
| Zc3h14  | + | + |
| Zc3h15  | + | + |
| Zc3h7b  | + | + |
| Zc3h8   | + | + |
| Zc4h2   | + | + |
| Zcchc24 | + | + |
| Zcchc6  | + | + |
| Zdhhc1  | + | + |
| Zdhhc14 | + | + |
| Zdhhc17 | + | + |
| Zdhhc18 | + | + |
| Zdhhc2  | + | + |
| Zdhhc24 | + | + |
| Zeb2    | + | + |
| Zfand1  | + | + |
| Zfand2b | + | + |
| Zfhx2   | + | + |
| Zfml    | + | + |
| Zfp101  | + | + |
| Zfp106  | + | + |
| Zfp11   | + | + |
| Zfp119a | + | + |
| Zfp160  | + | + |
| Zfp184  | + | + |
| Zfp2    | + | + |
| Zfp219  | + | + |
| Zfp248  | + | + |
| Zfp251  | + | + |
| Zfp259  | + | + |
| Zfp275  | + | + |
| Zfp277  | + | + |
| Zfp292  | + | + |
| Zfp30   | + | + |
| Zfp318  | + | + |
| Zfp322a | + | + |
| Zfp326  | + | + |
| Zfp330  | + | + |
| Zfp341  | + | + |
| Zfp358  | + | + |
| Zfp367  | + | + |
| Zfp385a | + | + |
| Zfp386  | + | + |

|         |   |   |
|---------|---|---|
| Zfp389  | + | + |
| Zfp395  | + | + |
| Zfp40   | + | + |
| Zfp41   | + | + |
| Zfp428  | + | + |
| Zfp438  | + | + |
| Zfp467  | + | + |
| Zfp493  | + | + |
| Zfp51   | + | + |
| Zfp516  | + | + |
| Zfp518a | + | + |
| Zfp518b | + | + |
| Zfp523  | + | + |
| Zfp574  | + | + |
| Zfp580  | + | + |
| Zfp593  | + | + |
| Zfp598  | + | + |
| Zfp609  | + | + |
| Zfp623  | + | + |
| Zfp637  | + | + |
| Zfp644  | + | + |
| Zfp661  | + | + |
| Zfp664  | + | + |
| Zfp677  | + | + |
| Zfp688  | + | + |
| Zfp7    | + | + |
| Zfp707  | + | + |
| Zfp715  | + | + |
| Zfp747  | + | + |
| Zfp760  | + | + |
| Zfp763  | + | + |
| Zfp786  | + | + |
| Zfp799  | + | + |
| Zfp800  | + | + |
| Zfp821  | + | + |
| Zfp827  | + | + |
| Zfp830  | + | + |
| Zfp839  | + | + |
| Zfp846  | + | + |
| Zfp867  | + | + |
| Zfp869  | + | + |
| Zfp90   | + | + |
| Zfp946  | + | + |
| Zfp952  | + | + |
| Zfp961  | + | + |
| Zfp964  | + | + |
| Zfr2    | + | + |
| Zfx     | + | + |
| Zfyve27 | + | + |
| Zhx1    | + | + |
| Zhx2    | + | + |
| Zhx3    | + | + |
| Zkscan1 | + | + |

|               |   |   |
|---------------|---|---|
| Zkscan16      | + | + |
| Zkscan3       | + | + |
| Zkscan8       | + | + |
| Zmat3         | + | + |
| Zmiz1         | + | + |
| Zmynd11       | + | + |
| Znrf1         | + | + |
| Znrf3         | + | + |
| Zranb2        | + | + |
| Zscan26       | + | + |
| Zswim5        | + | + |
| Zswim6        | + | + |
| Zwint         | + | + |
| Zxdc          | + | + |
| 0610007N19Rik | + | - |
| 0610009B14Rik | + | - |
| 0610012H03Rik | + | - |
| 0610040J01Rik | + | - |
| 0610043K17Rik | + | - |
| 1100001G20Rik | + | - |
| 1110017D15Rik | + | - |
| 1110032F04Rik | + | - |
| 1110046J04Rik | + | - |
| 1190003J15Rik | + | - |
| 1190005I06Rik | + | - |
| 1500002O10Rik | + | - |
| 1500009C09Rik | + | - |
| 1500009L16Rik | + | - |
| 1500012K07Rik | + | - |
| 1600010M07Rik | + | - |
| 1600014C23Rik | + | - |
| 1700001C02Rik | + | - |
| 1700001C19Rik | + | - |
| 1700001D01Rik | + | - |
| 1700001O22Rik | + | - |
| 1700003F12Rik | + | - |
| 1700003F17Rik | + | - |
| 1700003M02Rik | + | - |
| 1700006E09Rik | + | - |
| 1700012B09Rik | + | - |
| 1700012I11Rik | + | - |
| 1700013F07Rik | + | - |
| 1700016H13Rik | + | - |
| 1700016K19Rik | + | - |
| 1700016L21Rik | + | - |
| 1700017D01Rik | + | - |
| 1700017N19Rik | + | - |
| 1700019B03Rik | + | - |
| 1700019D03Rik | + | - |
| 1700020A23Rik | + | - |
| 1700020G17Rik | + | - |
| 1700020L24Rik | + | - |
| 1700021N21Rik | + | - |

|               |   |   |
|---------------|---|---|
| 1700022H16Rik | + | - |
| 1700022P22Rik | + | - |
| 1700025F22Rik | + | - |
| 1700025G04Rik | + | - |
| 1700026D08Rik | + | - |
| 1700026L06Rik | + | - |
| 1700028K03Rik | + | - |
| 1700029I15Rik | + | - |
| 1700029J03Rik | + | - |
| 1700029M20Rik | + | - |
| 1700030A11Rik | + | - |
| 1700031A10Rik | + | - |
| 1700039E22Rik | + | - |
| 1700041C23Rik | + | - |
| 1700041M19Rik | + | - |
| 1700045H11Rik | + | - |
| 1700045I19Rik | + | - |
| 1700047G03Rik | + | - |
| 1700051A21Rik | + | - |
| 1700052I22Rik | + | - |
| 1700065O20Rik | + | - |
| 1700066B19Rik | + | - |
| 1700066J24Rik | + | - |
| 1700067P10Rik | + | - |
| 1700073E17Rik | + | - |
| 1700092C02Rik | + | - |
| 1700092C10Rik | + | - |
| 1700094M24Rik | + | - |
| 1700095B22Rik | + | - |
| 1700096J18Rik | + | - |
| 1700106J16Rik | + | - |
| 1700109F18Rik | + | - |
| 1700112E06Rik | + | - |
| 1700113H08Rik | + | - |
| 1700122O11Rik | + | - |
| 1700125G02Rik | + | - |
| 1810007I06Rik | + | - |
| 1810011O10Rik | + | - |
| 1810019D21Rik | + | - |
| 1810019J16Rik | + | - |
| 1810020O05Rik | + | - |
| 1810041L15Rik | + | - |
| 1810046K07Rik | + | - |
| 2010001E11Rik | + | - |
| 2010002M12Rik | + | - |
| 2010015L04Rik | + | - |
| 2010016I18Rik | + | - |
| 2010300C02Rik | + | - |
| 2010310C07Rik | + | - |
| 2210019I11Rik | + | - |
| 2210039B01Rik | + | - |
| 2210416O15Rik | + | - |
| 2300002M23Rik | + | - |

|               |   |   |
|---------------|---|---|
| 2300005B03Rik | + | - |
| 2310030G06Rik | + | - |
| 2310039L15Rik | + | - |
| 2310043O21Rik | + | - |
| 2410003L11Rik | + | - |
| 2410004I01Rik | + | - |
| 2410017I17Rik | + | - |
| 2410114N07Rik | + | - |
| 2410124H12Rik | + | - |
| 2410137M14Rik | + | - |
| 2600006L11Rik | + | - |
| 2610016A17Rik | + | - |
| 2610017I09Rik | + | - |
| 2610019F03Rik | + | - |
| 2610027K06Rik | + | - |
| 2610034B18Rik | + | - |
| 2610035F20Rik | + | - |
| 2610100L16Rik | + | - |
| 2610203C20Rik | + | - |
| 2610203C22Rik | + | - |
| 2610307P16Rik | + | - |
| 2610316D01Rik | + | - |
| 2700069I18Rik | + | - |
| 2700086A05Rik | + | - |
| 2810025M15Rik | + | - |
| 2810032G03Rik | + | - |
| 2810405F15Rik | + | - |
| 2810410L24Rik | + | - |
| 2810459M11Rik | + | - |
| 2900008C10Rik | + | - |
| 2900011O08Rik | + | - |
| 2900026A02Rik | + | - |
| 2900041M22Rik | + | - |
| 2900055J20Rik | + | - |
| 2900079G21Rik | + | - |
| 2900092D14Rik | + | - |
| 3010001F23Rik | + | - |
| 3110021N24Rik | + | - |
| 3110039I08Rik | + | - |
| 3110039M20Rik | + | - |
| 3110047P20Rik | + | - |
| 3110079O15Rik | + | - |
| 3110082J24Rik | + | - |
| 3930402G23Rik | + | - |
| 4732490B19Rik | + | - |
| 4833403I15Rik | + | - |
| 4833422C13Rik | + | - |
| 4833427F10Rik | + | - |
| 4833427G06Rik | + | - |
| 4833428L15Rik | + | - |
| 4921501E09Rik | + | - |
| 4921507P07Rik | + | - |
| 4921508A21Rik | + | - |

|               |   |   |
|---------------|---|---|
| 4921530D09Rik | + | - |
| 4921536K21Rik | + | - |
| 4930402F06Rik | + | - |
| 4930404A10Rik | + | - |
| 4930407I10Rik | + | - |
| 4930412C18Rik | + | - |
| 4930413F20Rik | + | - |
| 4930414N06Rik | + | - |
| 4930415F15Rik | + | - |
| 4930415O20Rik | + | - |
| 4930417O13Rik | + | - |
| 4930417O22Rik | + | - |
| 4930425K10Rik | + | - |
| 4930425O10Rik | + | - |
| 4930428G15Rik | + | - |
| 4930444P10Rik | + | - |
| 4930449E18Rik | + | - |
| 4930451C15Rik | + | - |
| 4930468A15Rik | + | - |
| 4930469G21Rik | + | - |
| 4930478P22Rik | + | - |
| 4930479M11Rik | + | - |
| 4930480G23Rik | + | - |
| 4930480M12Rik | + | - |
| 4930483O08Rik | + | - |
| 4930488B22Rik | + | - |
| 4930488L21Rik | + | - |
| 4930500L23Rik | + | - |
| 4930506M07Rik | + | - |
| 4930511A02Rik | + | - |
| 4930511M11Rik | + | - |
| 4930519G04Rik | + | - |
| 4930520O04Rik | + | - |
| 4930522H14Rik | + | - |
| 4930524B15Rik | + | - |
| 4930524O05Rik | + | - |
| 4930525D18Rik | + | - |
| 4930526D03Rik | + | - |
| 4930526L06Rik | + | - |
| 4930539E08Rik | + | - |
| 4930540M03Rik | + | - |
| 4930543E12Rik | + | - |
| 4930546K05Rik | + | - |
| 4930547E08Rik | + | - |
| 4930547E14Rik | + | - |
| 4930548H24Rik | + | - |
| 4930549C01Rik | + | - |
| 4930552P12Rik | + | - |
| 4930556J02Rik | + | - |
| 4930556M19Rik | + | - |
| 4930563E18Rik | + | - |
| 4930568D16Rik | + | - |
| 4930592I03Rik | + | - |

|               |   |   |
|---------------|---|---|
| 4930593C16Rik | + | - |
| 4930599N23Rik | + | - |
| 4931409K22Rik | + | - |
| 4931419H13Rik | + | - |
| 4931423N10Rik | + | - |
| 4931429I11Rik | + | - |
| 4931440F15Rik | + | - |
| 4931440L10Rik | + | - |
| 4932441J04Rik | + | - |
| 4933401P06Rik | + | - |
| 4933402P03Rik | + | - |
| 4933406M09Rik | + | - |
| 4933407E24Rik | + | - |
| 4933407G14Rik | + | - |
| 4933411K16Rik | + | - |
| 4933422H20Rik | + | - |
| 4933424G06Rik | + | - |
| 4933429K18Rik | + | - |
| 4933431E20Rik | + | - |
| 4933432I03Rik | + | - |
| 5330417C22Rik | + | - |
| 5430434I15Rik | + | - |
| 5730420D15Rik | + | - |
| 5730457N03Rik | + | - |
| 5930403L14Rik | + | - |
| 5930412G12Rik | + | - |
| 6030419C18Rik | + | - |
| 6330403A02Rik | + | - |
| 6330403K07Rik | + | - |
| 6330410L21Rik | + | - |
| 6530411M01Rik | + | - |
| 6820408C15Rik | + | - |
| 8030443G20Rik | + | - |
| 8430427H17Rik | + | - |
| 9030612E09Rik | + | - |
| 9030617O03Rik | + | - |
| 9130019P16Rik | + | - |
| 9130409I23Rik | + | - |
| 9230102O04Rik | + | - |
| 9230112D13Rik | + | - |
| 9230112J17Rik | + | - |
| 9330111N05Rik | + | - |
| 9330117O12Rik | + | - |
| 9330182L06Rik | + | - |
| 9430020K01Rik | + | - |
| 9430021M05Rik | + | - |
| 9430041J12Rik | + | - |
| 9430076C15Rik | + | - |
| 9530003J23Rik | + | - |
| 9530036O11Rik | + | - |
| 9530051G07Rik | + | - |
| 9530059O14Rik | + | - |
| 9830001H06Rik | + | - |

|               |   |   |
|---------------|---|---|
| 9830166K06Rik | + | - |
| 9930013L23Rik | + | - |
| a             | + | - |
| A030009H04Rik | + | - |
| A230065H16Rik | + | - |
| A230070E04Rik | + | - |
| A330021E22Rik | + | - |
| A330041J22Rik | + | - |
| A330050F15Rik | + | - |
| A330076C08Rik | + | - |
| A430105I19Rik | + | - |
| A530013C23Rik | + | - |
| A530058N18Rik | + | - |
| A630075F10Rik | + | - |
| A630076J17Rik | + | - |
| A630095N17Rik | + | - |
| A730020E08Rik | + | - |
| A730056A06Rik | + | - |
| A730082K24Rik | + | - |
| A730090H04Rik | + | - |
| A830052D11Rik | + | - |
| A830082K12Rik | + | - |
| A930001C03Rik | + | - |
| A930003O13Rik | + | - |
| A930004D18Rik | + | - |
| A930006I01Rik | + | - |
| A930011G23Rik | + | - |
| A930011O12Rik | + | - |
| A930012L18Rik | + | - |
| AA467197      | + | - |
| Aanat         | + | - |
| Aatk          | + | - |
| Abat          | + | - |
| Abca17        | + | - |
| Abcb9         | + | - |
| Abcc2         | + | - |
| Abcc3         | + | - |
| Abcc6         | + | - |
| Abcc8         | + | - |
| Abcg1         | + | - |
| Abcg4         | + | - |
| Abcg5         | + | - |
| Abcg8         | + | - |
| Abhd12b       | + | - |
| Abhd14a       | + | - |
| Abhd14b       | + | - |
| Abhd3         | + | - |
| Abhd5         | + | - |
| Ablim3        | + | - |
| Abo           | + | - |
| Abr           | + | - |
| Acaa1b        | + | - |
| Acan          | + | - |



|                 |   |   |
|-----------------|---|---|
| <i>Acbd7</i>    | + | - |
| <i>Ace</i>      | + | - |
| <i>Acer2</i>    | + | - |
| <i>Ache</i>     | + | - |
| <i>Acot1</i>    | + | - |
| <i>Acot12</i>   | + | - |
| <i>Acot3</i>    | + | - |
| <i>Acot4</i>    | + | - |
| <i>Acot5</i>    | + | - |
| <i>Acox1</i>    | + | - |
| <i>Acpp</i>     | + | - |
| <i>Acpt</i>     | + | - |
| <i>Acs16</i>    | + | - |
| <i>Acta1</i>    | + | - |
| <i>Actg2</i>    | + | - |
| <i>Actl10</i>   | + | - |
| <i>Actl11</i>   | + | - |
| <i>Actl6b</i>   | + | - |
| <i>Actn1</i>    | + | - |
| <i>Actn2</i>    | + | - |
| <i>Acvr1</i>    | + | - |
| <i>Acvr1c</i>   | + | - |
| <i>Acvr2b</i>   | + | - |
| <i>Acvr1</i>    | + | - |
| <i>Adad1</i>    | + | - |
| <i>Adam11</i>   | + | - |
| <i>Adam1b</i>   | + | - |
| <i>Adam22</i>   | + | - |
| <i>Adam23</i>   | + | - |
| <i>Adam3</i>    | + | - |
| <i>Adam33</i>   | + | - |
| <i>Adam5</i>    | + | - |
| <i>Adamts1</i>  | + | - |
| <i>Adamts14</i> | + | - |
| <i>Adamts15</i> | + | - |
| <i>Adamts17</i> | + | - |
| <i>Adamts2</i>  | + | - |
| <i>Adamts20</i> | + | - |
| <i>Adamts4</i>  | + | - |
| <i>Adamts8</i>  | + | - |
| <i>Adamts12</i> | + | - |
| <i>Adamts14</i> | + | - |
| <i>Adamts15</i> | + | - |
| <i>Adarb1</i>   | + | - |
| <i>Adcy1</i>    | + | - |
| <i>Adcy5</i>    | + | - |
| <i>Adcy6</i>    | + | - |
| <i>Adcy8</i>    | + | - |
| <i>Adcy9</i>    | + | - |
| <i>Adcyap1</i>  | + | - |
| <i>Add2</i>     | + | - |
| <i>Adm</i>      | + | - |
| <i>Adm2</i>     | + | - |

|                 |   |   |
|-----------------|---|---|
| <i>Adora1</i>   | + | - |
| <i>Adra1a</i>   | + | - |
| <i>Adra1b</i>   | + | - |
| <i>Adra1d</i>   | + | - |
| <i>Adra2a</i>   | + | - |
| <i>Adra2b</i>   | + | - |
| <i>Adra2c</i>   | + | - |
| <i>Adrb1</i>    | + | - |
| <i>Adrb3</i>    | + | - |
| <i>Aebp1</i>    | + | - |
| <i>AF529169</i> | + | - |
| <i>Afap1</i>    | + | - |
| <i>Afap1l1</i>  | + | - |
| <i>Afap1l2</i>  | + | - |
| <i>Agpat2</i>   | + | - |
| <i>Agtr1a</i>   | + | - |
| <i>Ahrr</i>     | + | - |
| <i>Ahsg</i>     | + | - |
| <i>AI115009</i> | + | - |
| <i>AI118078</i> | + | - |
| <i>AI314831</i> | + | - |
| <i>AI317395</i> | + | - |
| <i>AI464131</i> | + | - |
| <i>AI593442</i> | + | - |
| <i>AI606473</i> | + | - |
| <i>AI646519</i> | + | - |
| <i>AI661453</i> | + | - |
| <i>AI836003</i> | + | - |
| <i>AI848285</i> | + | - |
| <i>AI854517</i> | + | - |
| <i>AI854703</i> | + | - |
| <i>Aif1l</i>    | + | - |
| <i>Aifm3</i>    | + | - |
| <i>Aipl1</i>    | + | - |
| <i>Airn</i>     | + | - |
| <i>Ajuba</i>    | + | - |
| <i>AK129341</i> | + | - |
| <i>Ak4</i>      | + | - |
| <i>Ak5</i>      | + | - |
| <i>Ak8</i>      | + | - |
| <i>Aknad1</i>   | + | - |
| <i>Akp3</i>     | + | - |
| <i>Akr1b8</i>   | + | - |
| <i>Akr1cl</i>   | + | - |
| <i>Akt3</i>     | + | - |
| <i>Aldh1a2</i>  | + | - |
| <i>Aldh1a3</i>  | + | - |
| <i>Aldh1l2</i>  | + | - |
| <i>Aldoart2</i> | + | - |
| <i>Alk</i>      | + | - |
| <i>Alox12</i>   | + | - |
| <i>Alox12b</i>  | + | - |
| <i>Alox12e</i>  | + | - |

|                 |   |   |
|-----------------|---|---|
| <i>Alox15</i>   | + | - |
| <i>Alox8</i>    | + | - |
| <i>Alpl</i>     | + | - |
| <i>Als2cl</i>   | + | - |
| <i>Alx1</i>     | + | - |
| <i>Alx3</i>     | + | - |
| <i>Alx4</i>     | + | - |
| <i>Ambn</i>     | + | - |
| <i>Amer2</i>    | + | - |
| <i>Amer3</i>    | + | - |
| <i>Amh</i>      | + | - |
| <i>Amhr2</i>    | + | - |
| <i>Amica1</i>   | + | - |
| <i>Amigo1</i>   | + | - |
| <i>Amn</i>      | + | - |
| <i>Amotl1</i>   | + | - |
| <i>Amotl2</i>   | + | - |
| <i>Ampd3</i>    | + | - |
| <i>Amph</i>     | + | - |
| <i>Amtn</i>     | + | - |
| <i>Angpt1</i>   | + | - |
| <i>Ank1</i>     | + | - |
| <i>Ank2</i>     | + | - |
| <i>Ankmy1</i>   | + | - |
| <i>Ankrd13b</i> | + | - |
| <i>Ankrd2</i>   | + | - |
| <i>Ankrd29</i>  | + | - |
| <i>Ankrd34b</i> | + | - |
| <i>Ankrd34c</i> | + | - |
| <i>Ankrd35</i>  | + | - |
| <i>Ankrd36</i>  | + | - |
| <i>Ankrd45</i>  | + | - |
| <i>Ankrd53</i>  | + | - |
| <i>Ankrd6</i>   | + | - |
| <i>Ankrd60</i>  | + | - |
| <i>Ankrd63</i>  | + | - |
| <i>Anks1b</i>   | + | - |
| <i>Anks6</i>    | + | - |
| <i>Ano9</i>     | + | - |
| <i>Anpep</i>    | + | - |
| <i>Antxr1</i>   | + | - |
| <i>Anxa13</i>   | + | - |
| <i>Anxa3</i>    | + | - |
| <i>Ap3b2</i>    | + | - |
| <i>Apc2</i>     | + | - |
| <i>Apcdd1</i>   | + | - |
| <i>Apln</i>     | + | - |
| <i>Apip1</i>    | + | - |
| <i>Apoa1</i>    | + | - |
| <i>Apoa5</i>    | + | - |
| <i>Apoc3</i>    | + | - |
| <i>Apoh</i>     | + | - |
| <i>Apol7d</i>   | + | - |

|                  |   |   |
|------------------|---|---|
| <i>Apom</i>      | + | - |
| <i>Aqp2</i>      | + | - |
| <i>Aqp3</i>      | + | - |
| <i>Aqp5</i>      | + | - |
| <i>Aqp6</i>      | + | - |
| <i>Aqp9</i>      | + | - |
| <i>Arap3</i>     | + | - |
| <i>Arc</i>       | + | - |
| <i>Arg2</i>      | + | - |
| <i>Arhgap20</i>  | + | - |
| <i>Arhgap22</i>  | + | - |
| <i>Arhgap29</i>  | + | - |
| <i>Arhgef10</i>  | + | - |
| <i>Arhgef10l</i> | + | - |
| <i>Arhgef15</i>  | + | - |
| <i>Arhgef16</i>  | + | - |
| <i>Arhgef19</i>  | + | - |
| <i>Arhgef26</i>  | + | - |
| <i>Arhgef28</i>  | + | - |
| <i>Arhgef37</i>  | + | - |
| <i>Arhgef40</i>  | + | - |
| <i>Arhgef5</i>   | + | - |
| <i>Arid3c</i>    | + | - |
| <i>Arl11</i>     | + | - |
| <i>Armc2</i>     | + | - |
| <i>Armcx1</i>    | + | - |
| <i>Armcx4</i>    | + | - |
| <i>Arnt2</i>     | + | - |
| <i>Arpp21</i>    | + | - |
| <i>Arsi</i>      | + | - |
| <i>Art1</i>      | + | - |
| <i>Art3</i>      | + | - |
| <i>Art4</i>      | + | - |
| <i>Art5</i>      | + | - |
| <i>Artn</i>      | + | - |
| <i>Arx</i>       | + | - |
| <i>Asap2</i>     | + | - |
| <i>Asap3</i>     | + | - |
| <i>Asb16</i>     | + | - |
| <i>Asb2</i>      | + | - |
| <i>Ascl1</i>     | + | - |
| <i>Ascl2</i>     | + | - |
| <i>Ascl5</i>     | + | - |
| <i>Asic1</i>     | + | - |
| <i>Asic2</i>     | + | - |
| <i>Asic3</i>     | + | - |
| <i>Asic4</i>     | + | - |
| <i>Asic5</i>     | + | - |
| <i>Aspdh</i>     | + | - |
| <i>Asph</i>      | + | - |
| <i>Asphd1</i>    | + | - |
| <i>Asphd2</i>    | + | - |
| <i>Astn2</i>     | + | - |

|                      |   |   |
|----------------------|---|---|
| <i>Asxl3</i>         | + | - |
| <i>Atcay</i>         | + | - |
| <i>Atg9b</i>         | + | - |
| <i>Atoh1</i>         | + | - |
| <i>Atoh7</i>         | + | - |
| <i>Atoh8</i>         | + | - |
| <i>Atp12a</i>        | + | - |
| <i>Atp1a2</i>        | + | - |
| <i>Atp1a3</i>        | + | - |
| <i>Atp1a4</i>        | + | - |
| <i>Atp1b1</i>        | + | - |
| <i>Atp2b2</i>        | + | - |
| <i>Atp2c2</i>        | + | - |
| <i>Atp4a</i>         | + | - |
| <i>Atp6v1c2</i>      | + | - |
| <i>Atp8a2</i>        | + | - |
| <i>Atp8b1</i>        | + | - |
| <i>Atp8b3</i>        | + | - |
| <i>Atp9a</i>         | + | - |
| <i>AU021063</i>      | + | - |
| <i>AU021092</i>      | + | - |
| <i>AU022754</i>      | + | - |
| <i>Auts2</i>         | + | - |
| <i>Avp</i>           | + | - |
| <i>Avpr1a</i>        | + | - |
| <i>Avpr1b</i>        | + | - |
| <i>Axin2</i>         | + | - |
| <i>B130024G19Rik</i> | + | - |
| <i>B230118H07Rik</i> | + | - |
| <i>B230119M05Rik</i> | + | - |
| <i>B230206H07Rik</i> | + | - |
| <i>B230216G23Rik</i> | + | - |
| <i>B230312C02Rik</i> | + | - |
| <i>B230323A14Rik</i> | + | - |
| <i>B3galnt1</i>      | + | - |
| <i>B3galt5</i>       | + | - |
| <i>B3gnt4</i>        | + | - |
| <i>B3gnt6</i>        | + | - |
| <i>B430212C06Rik</i> | + | - |
| <i>B430319G15Rik</i> | + | - |
| <i>B4galnt2</i>      | + | - |
| <i>B4galnt3</i>      | + | - |
| <i>B4galnt4</i>      | + | - |
| <i>B4galt2</i>       | + | - |
| <i>B4galt4</i>       | + | - |
| <i>B4galt6</i>       | + | - |
| <i>B630019K06Rik</i> | + | - |
| <i>B830017H08Rik</i> | + | - |
| <i>B930018H19Rik</i> | + | - |
| <i>B930025P03Rik</i> | + | - |
| <i>B930041F14Rik</i> | + | - |
| <i>Baalc</i>         | + | - |
| <i>Bace1</i>         | + | - |

|                 |   |   |
|-----------------|---|---|
| <i>Bace2</i>    | + | - |
| <i>Bahcc1</i>   | + | - |
| <i>Bai1</i>     | + | - |
| <i>Bai2</i>     | + | - |
| <i>Baiap3</i>   | + | - |
| <i>Bambi</i>    | + | - |
| <i>Barhl1</i>   | + | - |
| <i>Barhl2</i>   | + | - |
| <i>Barx1</i>    | + | - |
| <i>Barx2</i>    | + | - |
| <i>Batf3</i>    | + | - |
| <i>Bbs7</i>     | + | - |
| <i>BC005764</i> | + | - |
| <i>BC016579</i> | + | - |
| <i>BC018242</i> | + | - |
| <i>BC021891</i> | + | - |
| <i>BC022687</i> | + | - |
| <i>BC024386</i> | + | - |
| <i>BC030476</i> | + | - |
| <i>BC039966</i> | + | - |
| <i>BC048502</i> | + | - |
| <i>BC048562</i> | + | - |
| <i>BC048602</i> | + | - |
| <i>BC048679</i> | + | - |
| <i>BC048943</i> | + | - |
| <i>BC055111</i> | + | - |
| <i>BC061194</i> | + | - |
| <i>BC068157</i> | + | - |
| <i>BC089491</i> | + | - |
| <i>BC096441</i> | + | - |
| <i>Bcam</i>     | + | - |
| <i>Bcan</i>     | + | - |
| <i>Bcl11b</i>   | + | - |
| <i>Bcl2l2</i>   | + | - |
| <i>Bcl6b</i>    | + | - |
| <i>Bcorl1</i>   | + | - |
| <i>Bdkrb2</i>   | + | - |
| <i>Bean1</i>    | + | - |
| <i>Bend4</i>    | + | - |
| <i>Bend6</i>    | + | - |
| <i>Bend7</i>    | + | - |
| <i>Best2</i>    | + | - |
| <i>Bet3l</i>    | + | - |
| <i>Beta-s</i>   | + | - |
| <i>Bfsp1</i>    | + | - |
| <i>Bfsp2</i>    | + | - |
| <i>Bglap3</i>   | + | - |
| <i>Bgn</i>      | + | - |
| <i>Bhlha9</i>   | + | - |
| <i>Bhlhe22</i>  | + | - |
| <i>Bhlhe23</i>  | + | - |
| <i>Bicc1</i>    | + | - |
| <i>Bin1</i>     | + | - |

|                      |   |   |
|----------------------|---|---|
| <i>Bmp2</i>          | + | - |
| <i>Bmp4</i>          | + | - |
| <i>Bmp6</i>          | + | - |
| <i>Bmp7</i>          | + | - |
| <i>Bmp8b</i>         | + | - |
| <i>Bmper</i>         | + | - |
| <i>Bnc1</i>          | + | - |
| <i>Bnc2</i>          | + | - |
| <i>Boc</i>           | + | - |
| <i>Bok</i>           | + | - |
| <i>Boll</i>          | + | - |
| <i>Bpifb4</i>        | + | - |
| <i>Bpifc</i>         | + | - |
| <i>Brdt</i>          | + | - |
| <i>Brsk1</i>         | + | - |
| <i>Brsk2</i>         | + | - |
| <i>Bsn</i>           | + | - |
| <i>Bst1</i>          | + | - |
| <i>Bsx</i>           | + | - |
| <i>Btbd11</i>        | + | - |
| <i>Btbd17</i>        | + | - |
| <i>Btg4</i>          | + | - |
| <i>Btn2a2</i>        | + | - |
| <i>Btnl10</i>        | + | - |
| <i>Btnl4</i>         | + | - |
| <i>Btnl9</i>         | + | - |
| <i>Bves</i>          | + | - |
| <i>Bzrap1</i>        | + | - |
| <i>C130021I20Rik</i> | + | - |
| <i>C130026L21Rik</i> | + | - |
| <i>C130060K24Rik</i> | + | - |
| <i>C130071C03Rik</i> | + | - |
| <i>C130074G19Rik</i> | + | - |
| <i>C1ql1</i>         | + | - |
| <i>C1ql2</i>         | + | - |
| <i>C1ql3</i>         | + | - |
| <i>C1ql4</i>         | + | - |
| <i>C1qtnf1</i>       | + | - |
| <i>C1qtnf2</i>       | + | - |
| <i>C1qtnf4</i>       | + | - |
| <i>C230024C17Rik</i> | + | - |
| <i>C2cd4a</i>        | + | - |
| <i>C2cd4b</i>        | + | - |
| <i>C2cd4c</i>        | + | - |
| <i>C2cd4d</i>        | + | - |
| <i>C3</i>            | + | - |
| <i>C330005M16Rik</i> | + | - |
| <i>C330022C24Rik</i> | + | - |
| <i>C3ar1</i>         | + | - |
| <i>C4bp</i>          | + | - |
| <i>C630020P19Rik</i> | + | - |
| <i>C77080</i>        | + | - |
| <i>C77370</i>        | + | - |

|                 |   |   |
|-----------------|---|---|
| <i>C86187</i>   | + | - |
| <i>Cables1</i>  | + | - |
| <i>Cabp2</i>    | + | - |
| <i>Cabp7</i>    | + | - |
| <i>Cachd1</i>   | + | - |
| <i>Cacna1a</i>  | + | - |
| <i>Cacna1b</i>  | + | - |
| <i>Cacna1c</i>  | + | - |
| <i>Cacna1d</i>  | + | - |
| <i>Cacna1e</i>  | + | - |
| <i>Cacna1g</i>  | + | - |
| <i>Cacna1i</i>  | + | - |
| <i>Cacna1s</i>  | + | - |
| <i>Cacna2d1</i> | + | - |
| <i>Cacna2d2</i> | + | - |
| <i>Cacna2d3</i> | + | - |
| <i>Cacnb2</i>   | + | - |
| <i>Cacnb3</i>   | + | - |
| <i>Cacnb4</i>   | + | - |
| <i>Cacng2</i>   | + | - |
| <i>Cacng4</i>   | + | - |
| <i>Cacng5</i>   | + | - |
| <i>Cacng6</i>   | + | - |
| <i>Cacng7</i>   | + | - |
| <i>Cacng8</i>   | + | - |
| <i>Cadm1</i>    | + | - |
| <i>Cadm2</i>    | + | - |
| <i>Cadm3</i>    | + | - |
| <i>Cadm4</i>    | + | - |
| <i>Cadps2</i>   | + | - |
| <i>Calb1</i>    | + | - |
| <i>Calca</i>    | + | - |
| <i>Calcb</i>    | + | - |
| <i>Calcoco2</i> | + | - |
| <i>Calml4</i>   | + | - |
| <i>Calr4</i>    | + | - |
| <i>Caly</i>     | + | - |
| <i>Camk1</i>    | + | - |
| <i>Camk2a</i>   | + | - |
| <i>Camk2b</i>   | + | - |
| <i>Camk2n1</i>  | + | - |
| <i>Camk4</i>    | + | - |
| <i>Camkv</i>    | + | - |
| <i>Camsap3</i>  | + | - |
| <i>Cap2</i>     | + | - |
| <i>Car10</i>    | + | - |
| <i>Car11</i>    | + | - |
| <i>Car12</i>    | + | - |
| <i>Car14</i>    | + | - |
| <i>Car15</i>    | + | - |
| <i>Car3</i>     | + | - |
| <i>Car4</i>     | + | - |
| <i>Car7</i>     | + | - |



|                 |   |   |
|-----------------|---|---|
| <i>Car8</i>     | + | - |
| <i>Card10</i>   | + | - |
| <i>Card14</i>   | + | - |
| <i>Cartpt</i>   | + | - |
| <i>Caskin1</i>  | + | - |
| <i>Casq1</i>    | + | - |
| <i>Casr</i>     | + | - |
| <i>Casz1</i>    | + | - |
| <i>Cav1</i>     | + | - |
| <i>Cav2</i>     | + | - |
| <i>Cbln1</i>    | + | - |
| <i>Cbr2</i>     | + | - |
| <i>Cbr3</i>     | + | - |
| <i>Ccbe1</i>    | + | - |
| <i>Ccdc105</i>  | + | - |
| <i>Ccdc106</i>  | + | - |
| <i>Ccdc108</i>  | + | - |
| <i>Ccdc110</i>  | + | - |
| <i>Ccdc113</i>  | + | - |
| <i>Ccdc13</i>   | + | - |
| <i>Ccdc136</i>  | + | - |
| <i>Ccdc144b</i> | + | - |
| <i>Ccdc149</i>  | + | - |
| <i>Ccdc153</i>  | + | - |
| <i>Ccdc158</i>  | + | - |
| <i>Ccdc160</i>  | + | - |
| <i>Ccdc164</i>  | + | - |
| <i>Ccdc177</i>  | + | - |
| <i>Ccdc19</i>   | + | - |
| <i>Ccdc3</i>    | + | - |
| <i>Ccdc33</i>   | + | - |
| <i>Ccdc36</i>   | + | - |
| <i>Ccdc37</i>   | + | - |
| <i>Ccdc40</i>   | + | - |
| <i>Ccdc64</i>   | + | - |
| <i>Ccdc64b</i>  | + | - |
| <i>Ccdc65</i>   | + | - |
| <i>Ccdc67</i>   | + | - |
| <i>Ccdc73</i>   | + | - |
| <i>Ccdc8</i>    | + | - |
| <i>Ccdc89</i>   | + | - |
| <i>Cck</i>      | + | - |
| <i>Cckbr</i>    | + | - |
| <i>Ccl26</i>    | + | - |
| <i>Ccl3</i>     | + | - |
| <i>Ccl4</i>     | + | - |
| <i>Ccna1</i>    | + | - |
| <i>Ccnb1ip1</i> | + | - |
| <i>Ccnj1</i>    | + | - |
| <i>Ccno</i>     | + | - |
| <i>Ccr10</i>    | + | - |
| <i>Ccr6</i>     | + | - |
| <i>Ccr7</i>     | + | - |

|                   |   |   |
|-------------------|---|---|
| <i>Ccr11</i>      | + | - |
| <i>Ccser1</i>     | + | - |
| <i>Cd109</i>      | + | - |
| <i>Cd14</i>       | + | - |
| <i>Cd160</i>      | + | - |
| <i>Cd164l2</i>    | + | - |
| <i>Cd1d2</i>      | + | - |
| <i>Cd200r3</i>    | + | - |
| <i>Cd248</i>      | + | - |
| <i>Cd276</i>      | + | - |
| <i>Cd28</i>       | + | - |
| <i>Cd300a</i>     | + | - |
| <i>Cd300e</i>     | + | - |
| <i>Cd302</i>      | + | - |
| <i>Cd34</i>       | + | - |
| <i>Cd3d</i>       | + | - |
| <i>Cd3g</i>       | + | - |
| <i>Cd4</i>        | + | - |
| <i>Cd59a</i>      | + | - |
| <i>Cd63</i>       | + | - |
| <i>Cd70</i>       | + | - |
| <i>Cda</i>        | + | - |
| <i>Cdc42bpa</i>   | + | - |
| <i>Cdc42ep1</i>   | + | - |
| <i>Cdc42ep5</i>   | + | - |
| <i>Cdcp1</i>      | + | - |
| <i>Cdh1</i>       | + | - |
| <i>Cdh11</i>      | + | - |
| <i>Cdh15</i>      | + | - |
| <i>Cdh2</i>       | + | - |
| <i>Cdh22</i>      | + | - |
| <i>Cdh3</i>       | + | - |
| <i>Cdh4</i>       | + | - |
| <i>Cdh5</i>       | + | - |
| <i>Cdh6</i>       | + | - |
| <i>Cdhr1</i>      | + | - |
| <i>Cdhr3</i>      | + | - |
| <i>Cdhr5</i>      | + | - |
| <i>Cdk14</i>      | + | - |
| <i>Cdk15</i>      | + | - |
| <i>Cdk18</i>      | + | - |
| <i>Cdk5r2</i>     | + | - |
| <i>Cdkn1c</i>     | + | - |
| <i>Cdkn2d</i>     | + | - |
| <i>Cdo1</i>       | + | - |
| <i>Cdr2l</i>      | + | - |
| <i>Cds1</i>       | + | - |
| <i>Cdsn</i>       | + | - |
| <i>Cdx1</i>       | + | - |
| <i>Cdx2</i>       | + | - |
| <i>Cdx4</i>       | + | - |
| <i>Ceacam-ps1</i> | + | - |
| <i>Ceacam15</i>   | + | - |

|               |   |   |
|---------------|---|---|
| <i>Cebpa</i>  | + | - |
| <i>Cebpb</i>  | + | - |
| <i>Cebpe</i>  | + | - |
| <i>Cecr6</i>  | + | - |
| <i>Celf2</i>  | + | - |
| <i>Celf3</i>  | + | - |
| <i>Celf4</i>  | + | - |
| <i>Celf5</i>  | + | - |
| <i>Celf6</i>  | + | - |
| <i>Celsr1</i> | + | - |
| <i>Celsr2</i> | + | - |
| <i>Celsr3</i> | + | - |
| <i>Cend1</i>  | + | - |
| <i>Cep112</i> | + | - |
| <i>Cerkl</i>  | + | - |
| <i>Cers1</i>  | + | - |
| <i>Cfc1</i>   | + | - |
| <i>Cfd</i>    | + | - |
| <i>Cfi</i>    | + | - |
| <i>Cga</i>    | + | - |
| <i>Cgnl1</i>  | + | - |
| <i>Cgref1</i> | + | - |
| <i>Chadl</i>  | + | - |
| <i>Chat</i>   | + | - |
| <i>Chd5</i>   | + | - |
| <i>Chdh</i>   | + | - |
| <i>Chga</i>   | + | - |
| <i>Chgb</i>   | + | - |
| <i>Chi3l3</i> | + | - |
| <i>Chi3l4</i> | + | - |
| <i>Chit1</i>  | + | - |
| <i>Chl1</i>   | + | - |
| <i>Chmp4c</i> | + | - |
| <i>Chn1</i>   | + | - |
| <i>Chn2</i>   | + | - |
| <i>Chp2</i>   | + | - |
| <i>Chrd</i>   | + | - |
| <i>Chrdl2</i> | + | - |
| <i>Chrm1</i>  | + | - |
| <i>Chrm3</i>  | + | - |
| <i>Chrm5</i>  | + | - |
| <i>Chrna1</i> | + | - |
| <i>Chrna3</i> | + | - |
| <i>Chrna4</i> | + | - |
| <i>Chrna5</i> | + | - |
| <i>Chrnb2</i> | + | - |
| <i>Chrnb4</i> | + | - |
| <i>Chrnd</i>  | + | - |
| <i>Chrng</i>  | + | - |
| <i>Chst1</i>  | + | - |
| <i>Chst2</i>  | + | - |
| <i>Chst5</i>  | + | - |
| <i>Chst8</i>  | + | - |

|                |   |   |
|----------------|---|---|
| <i>Chsy3</i>   | + | - |
| <i>Cib2</i>    | + | - |
| <i>Cidea</i>   | + | - |
| <i>Cideb</i>   | + | - |
| <i>Cilp2</i>   | + | - |
| <i>Cited1</i>  | + | - |
| <i>Ckap4</i>   | + | - |
| <i>Ckmt1</i>   | + | - |
| <i>Cldn11</i>  | + | - |
| <i>Cldn14</i>  | + | - |
| <i>Cldn19</i>  | + | - |
| <i>Cldn26</i>  | + | - |
| <i>Cldn3</i>   | + | - |
| <i>Cldn5</i>   | + | - |
| <i>Cldn6</i>   | + | - |
| <i>Cldn7</i>   | + | - |
| <i>Cldn9</i>   | + | - |
| <i>Cldnd2</i>  | + | - |
| <i>Clec12b</i> | + | - |
| <i>Clec1a</i>  | + | - |
| <i>Clec1b</i>  | + | - |
| <i>Clec2h</i>  | + | - |
| <i>Clec2l</i>  | + | - |
| <i>Clgn</i>    | + | - |
| <i>Clic5</i>   | + | - |
| <i>Clic6</i>   | + | - |
| <i>Clip3</i>   | + | - |
| <i>Clip4</i>   | + | - |
| <i>Clmn</i>    | + | - |
| <i>Clmp</i>    | + | - |
| <i>Cln8</i>    | + | - |
| <i>Clrn2</i>   | + | - |
| <i>Clstn1</i>  | + | - |
| <i>Clstn2</i>  | + | - |
| <i>Clstn3</i>  | + | - |
| <i>Cmb1</i>    | + | - |
| <i>Cmklr1</i>  | + | - |
| <i>Cmtm4</i>   | + | - |
| <i>Cnfn</i>    | + | - |
| <i>Cnga1</i>   | + | - |
| <i>Cnga3</i>   | + | - |
| <i>Cnga4</i>   | + | - |
| <i>Cnih2</i>   | + | - |
| <i>Cnih3</i>   | + | - |
| <i>Cnksr1</i>  | + | - |
| <i>Cnksr2</i>  | + | - |
| <i>Cnn1</i>    | + | - |
| <i>Cnn3</i>    | + | - |
| <i>Cnm1</i>    | + | - |
| <i>Cnr1</i>    | + | - |
| <i>Cntlh</i>   | + | - |
| <i>Cntn2</i>   | + | - |
| <i>Cntnap1</i> | + | - |

|                |   |   |
|----------------|---|---|
| <i>Cobl</i>    | + | - |
| <i>Cobl1</i>   | + | - |
| <i>Coch</i>    | + | - |
| <i>Col11a2</i> | + | - |
| <i>Col12a1</i> | + | - |
| <i>Col13a1</i> | + | - |
| <i>Col14a1</i> | + | - |
| <i>Col15a1</i> | + | - |
| <i>Col16a1</i> | + | - |
| <i>Col17a1</i> | + | - |
| <i>Col18a1</i> | + | - |
| <i>Col19a1</i> | + | - |
| <i>Col1a1</i>  | + | - |
| <i>Col25a1</i> | + | - |
| <i>Col26a1</i> | + | - |
| <i>Col2a1</i>  | + | - |
| <i>Col4a1</i>  | + | - |
| <i>Col4a2</i>  | + | - |
| <i>Col5a1</i>  | + | - |
| <i>Col5a3</i>  | + | - |
| <i>Col7a1</i>  | + | - |
| <i>Col8a2</i>  | + | - |
| <i>Col9a2</i>  | + | - |
| <i>Colq</i>    | + | - |
| <i>Comp</i>    | + | - |
| <i>Copz2</i>   | + | - |
| <i>Corin</i>   | + | - |
| <i>Coro2b</i>  | + | - |
| <i>Cox4i2</i>  | + | - |
| <i>Cox6a2</i>  | + | - |
| <i>Cpa2</i>    | + | - |
| <i>Cpa5</i>    | + | - |
| <i>Cpb2</i>    | + | - |
| <i>Cpd</i>     | + | - |
| <i>Cpe</i>     | + | - |
| <i>Cpeb1</i>   | + | - |
| <i>Cplx1</i>   | + | - |
| <i>Cplx2</i>   | + | - |
| <i>Cplx3</i>   | + | - |
| <i>Cpn1</i>    | + | - |
| <i>Cpne2</i>   | + | - |
| <i>Cpne5</i>   | + | - |
| <i>Cpne6</i>   | + | - |
| <i>Cpne7</i>   | + | - |
| <i>Cpne9</i>   | + | - |
| <i>Cpt1c</i>   | + | - |
| <i>Cpxm1</i>   | + | - |
| <i>Cpxm2</i>   | + | - |
| <i>Cpz</i>     | + | - |
| <i>Crabp1</i>  | + | - |
| <i>Crabp2</i>  | + | - |
| <i>Creb3l1</i> | + | - |
| <i>Creb3l3</i> | + | - |

|                   |   |   |
|-------------------|---|---|
| <i>Crh</i>        | + | - |
| <i>Crhbp</i>      | + | - |
| <i>Crhr1</i>      | + | - |
| <i>Crim1</i>      | + | - |
| <i>Crip3</i>      | + | - |
| <i>Crlf1</i>      | + | - |
| <i>Crmp1</i>      | + | - |
| <i>Crtac1</i>     | + | - |
| <i>Cryab</i>      | + | - |
| <i>Cryba1</i>     | + | - |
| <i>Cryba2</i>     | + | - |
| <i>Csf3r</i>      | + | - |
| <i>Csgalnact1</i> | + | - |
| <i>Csmd3</i>      | + | - |
| <i>Csnk2a2</i>    | + | - |
| <i>Cspg4</i>      | + | - |
| <i>Cspg5</i>      | + | - |
| <i>Csrnp2</i>     | + | - |
| <i>Cst6</i>       | + | - |
| <i>Cstl1</i>      | + | - |
| <i>Ctbp2</i>      | + | - |
| <i>Ctdspl</i>     | + | - |
| <i>Ctf1</i>       | + | - |
| <i>Ctf2</i>       | + | - |
| <i>Ctgf</i>       | + | - |
| <i>Cth</i>        | + | - |
| <i>Cthrc1</i>     | + | - |
| <i>Ctif</i>       | + | - |
| <i>Ctnnbip1</i>   | + | - |
| <i>Ctnnd1</i>     | + | - |
| <i>Ctnnd2</i>     | + | - |
| <i>Ctsf</i>       | + | - |
| <i>Ctsw</i>       | + | - |
| <i>Ctn</i>        | + | - |
| <i>Ctxn2</i>      | + | - |
| <i>Cuedc1</i>     | + | - |
| <i>Cux2</i>       | + | - |
| <i>Cwh43</i>      | + | - |
| <i>Cx3cl1</i>     | + | - |
| <i>Cxcl11</i>     | + | - |
| <i>Cxcl12</i>     | + | - |
| <i>Cxcl14</i>     | + | - |
| <i>Cxcl16</i>     | + | - |
| <i>Cxcl2</i>      | + | - |
| <i>Cxcl9</i>      | + | - |
| <i>Cxcr1</i>      | + | - |
| <i>Cxcr7</i>      | + | - |
| <i>Cxxc4</i>      | + | - |
| <i>Cyb561</i>     | + | - |
| <i>Cyb5r2</i>     | + | - |
| <i>Cybrd1</i>     | + | - |
| <i>Cygb</i>       | + | - |
| <i>Cyp17a1</i>    | + | - |

|                      |   |   |
|----------------------|---|---|
| <i>Cyp1a1</i>        | + | - |
| <i>Cyp1b1</i>        | + | - |
| <i>Cyp24a1</i>       | + | - |
| <i>Cyp26a1</i>       | + | - |
| <i>Cyp26b1</i>       | + | - |
| <i>Cyp27b1</i>       | + | - |
| <i>Cyp2ab1</i>       | + | - |
| <i>Cyp2d22</i>       | + | - |
| <i>Cyp2s1</i>        | + | - |
| <i>Cyp2w1</i>        | + | - |
| <i>Cyp46a1</i>       | + | - |
| <i>Cyp4f14</i>       | + | - |
| <i>Cyp4f39</i>       | + | - |
| <i>Cyp4x1</i>        | + | - |
| <i>Cyr61</i>         | + | - |
| <i>Cys1</i>          | + | - |
| <i>D030025P21Rik</i> | + | - |
| <i>D10Bwg1379e</i>   | + | - |
| <i>D230030E09Rik</i> | + | - |
| <i>D330045A20Rik</i> | + | - |
| <i>D330050G23Rik</i> | + | - |
| <i>D430036J16Rik</i> | + | - |
| <i>D430041D05Rik</i> | + | - |
| <i>D630003M21Rik</i> | + | - |
| <i>D630039A03Rik</i> | + | - |
| <i>D630041G03Rik</i> | + | - |
| <i>D630045J12Rik</i> | + | - |
| <i>D6Ertd527e</i>    | + | - |
| <i>D730039F16Rik</i> | + | - |
| <i>D7Ertd143e</i>    | + | - |
| <i>D930007P13Rik</i> | + | - |
| <i>D930020B18Rik</i> | + | - |
| <i>D930028M14Rik</i> | + | - |
| <i>D930032P07Rik</i> | + | - |
| <i>Dab1</i>          | + | - |
| <i>Dab2</i>          | + | - |
| <i>Dab2ip</i>        | + | - |
| <i>Dach1</i>         | + | - |
| <i>Dact1</i>         | + | - |
| <i>Dact3</i>         | + | - |
| <i>Dagla</i>         | + | - |
| <i>Dapk2</i>         | + | - |
| <i>Dbn1</i>          | + | - |
| <i>Dbnidd1</i>       | + | - |
| <i>Dbnidd2</i>       | + | - |
| <i>Dbx1</i>          | + | - |
| <i>Dbx2</i>          | + | - |
| <i>Dcdc2a</i>        | + | - |
| <i>Dchs1</i>         | + | - |
| <i>Dclk2</i>         | + | - |
| <i>Dclk3</i>         | + | - |
| <i>Ddah1</i>         | + | - |
| <i>Ddit4l</i>        | + | - |

|                |   |   |
|----------------|---|---|
| <i>Ddn</i>     | + | - |
| <i>Ddr1</i>    | + | - |
| <i>Ddx43</i>   | + | - |
| <i>Defb20</i>  | + | - |
| <i>Defb25</i>  | + | - |
| <i>Degs2</i>   | + | - |
| <i>Dennd2a</i> | + | - |
| <i>Depdc7</i>  | + | - |
| <i>Des</i>     | + | - |
| <i>Dfna5</i>   | + | - |
| <i>Dfnb59</i>  | + | - |
| <i>Dgat2</i>   | + | - |
| <i>Dgat2l6</i> | + | - |
| <i>Dgkh</i>    | + | - |
| <i>Dgki</i>    | + | - |
| <i>Dhh</i>     | + | - |
| <i>Dhrs13</i>  | + | - |
| <i>Dhrs2</i>   | + | - |
| <i>Dhtkd1</i>  | + | - |
| <i>Dio1</i>    | + | - |
| <i>Dio3</i>    | + | - |
| <i>Dio3os</i>  | + | - |
| <i>Dip2c</i>   | + | - |
| <i>Diras1</i>  | + | - |
| <i>Diras2</i>  | + | - |
| <i>Disp2</i>   | + | - |
| <i>Dixdc1</i>  | + | - |
| <i>Dkk1</i>    | + | - |
| <i>Dkk3</i>    | + | - |
| <i>Dleu7</i>   | + | - |
| <i>Dlg4</i>    | + | - |
| <i>Dlg5</i>    | + | - |
| <i>Dlgap2</i>  | + | - |
| <i>Dlgap3</i>  | + | - |
| <i>Dlk1</i>    | + | - |
| <i>Dlk2</i>    | + | - |
| <i>Dll3</i>    | + | - |
| <i>Dll4</i>    | + | - |
| <i>Dlx1as</i>  | + | - |
| <i>Dlx2</i>    | + | - |
| <i>Dlx3</i>    | + | - |
| <i>Dlx4</i>    | + | - |
| <i>Dlx5</i>    | + | - |
| <i>Dlx6</i>    | + | - |
| <i>Dlx6as1</i> | + | - |
| <i>Dlx6as2</i> | + | - |
| <i>Dmbx1</i>   | + | - |
| <i>Dmc1</i>    | + | - |
| <i>Dmrt1</i>   | + | - |
| <i>Dmrt2</i>   | + | - |
| <i>Dmrt3</i>   | + | - |
| <i>Dmrta1</i>  | + | - |
| <i>Dmrta2</i>  | + | - |



|                 |   |   |
|-----------------|---|---|
| <i>Dmxi2</i>    | + | - |
| <i>Dnaaf3</i>   | + | - |
| <i>Dnahc11</i>  | + | - |
| <i>Dnahc2</i>   | + | - |
| <i>Dnaic2</i>   | + | - |
| <i>Dnaja4</i>   | + | - |
| <i>Dnajib13</i> | + | - |
| <i>Dnajib3</i>  | + | - |
| <i>Dnajc22</i>  | + | - |
| <i>Dnajc5b</i>  | + | - |
| <i>Dnajc5g</i>  | + | - |
| <i>Dnajc6</i>   | + | - |
| <i>Dnase1l3</i> | + | - |
| <i>Dner</i>     | + | - |
| <i>Dnm1</i>     | + | - |
| <i>Dnm3</i>     | + | - |
| <i>Dnm3os</i>   | + | - |
| <i>Dnmt3l</i>   | + | - |
| <i>Dnph1</i>    | + | - |
| <i>Dntt</i>     | + | - |
| <i>Doc2a</i>    | + | - |
| <i>Doc2b</i>    | + | - |
| <i>Dock3</i>    | + | - |
| <i>Dock5</i>    | + | - |
| <i>Dock7</i>    | + | - |
| <i>Dok4</i>     | + | - |
| <i>Dok7</i>     | + | - |
| <i>Dos</i>      | + | - |
| <i>Dpep2</i>    | + | - |
| <i>Dpf1</i>     | + | - |
| <i>Dppa3</i>    | + | - |
| <i>Dpy19l2</i>  | + | - |
| <i>Dqx1</i>     | + | - |
| <i>Draxin</i>   | + | - |
| <i>Drd1a</i>    | + | - |
| <i>Drd4</i>     | + | - |
| <i>Drd5</i>     | + | - |
| <i>Dscam</i>    | + | - |
| <i>Dscaml1</i>  | + | - |
| <i>Dse</i>      | + | - |
| <i>Dsp</i>      | + | - |
| <i>Dstyk</i>    | + | - |
| <i>Duox1</i>    | + | - |
| <i>Duox2</i>    | + | - |
| <i>Duoxa1</i>   | + | - |
| <i>Duoxa2</i>   | + | - |
| <i>Dusp15</i>   | + | - |
| <i>Dusp18</i>   | + | - |
| <i>Dusp26</i>   | + | - |
| <i>Dusp3</i>    | + | - |
| <i>Dusp9</i>    | + | - |
| <i>Dynlrb2</i>  | + | - |
| <i>Dysf</i>     | + | - |

|                      |   |   |
|----------------------|---|---|
| <i>Dzip1</i>         | + | - |
| <i>Dzip1l</i>        | + | - |
| <i>E030013I19Rik</i> | + | - |
| <i>E030019B13Rik</i> | + | - |
| <i>E030044B06Rik</i> | + | - |
| <i>E130003G02Rik</i> | + | - |
| <i>E130012A19Rik</i> | + | - |
| <i>E130018N17Rik</i> | + | - |
| <i>E130201H02Rik</i> | + | - |
| <i>E130309D14Rik</i> | + | - |
| <i>E230016K23Rik</i> | + | - |
| <i>E230019M04Rik</i> | + | - |
| <i>E230025N22Rik</i> | + | - |
| <i>E330013P04Rik</i> | + | - |
| <i>E330033B04Rik</i> | + | - |
| <i>E530011L22Rik</i> | + | - |
| <i>Ebf2</i>          | + | - |
| <i>Ebf3</i>          | + | - |
| <i>Ebf4</i>          | + | - |
| <i>Ecel1</i>         | + | - |
| <i>Echdc2</i>        | + | - |
| <i>Eci3</i>          | + | - |
| <i>Ecscr</i>         | + | - |
| <i>Edil3</i>         | + | - |
| <i>Edn2</i>          | + | - |
| <i>Edn3</i>          | + | - |
| <i>Eef1a2</i>        | + | - |
| <i>Efcab10</i>       | + | - |
| <i>Efcab4a</i>       | + | - |
| <i>Efcab5</i>        | + | - |
| <i>Efcab6</i>        | + | - |
| <i>Efcc1</i>         | + | - |
| <i>Efemp2</i>        | + | - |
| <i>Efhd1</i>         | + | - |
| <i>Efna2</i>         | + | - |
| <i>Efna3</i>         | + | - |
| <i>Efna4</i>         | + | - |
| <i>Efna5</i>         | + | - |
| <i>Efnb3</i>         | + | - |
| <i>Efr3b</i>         | + | - |
| <i>Efs</i>           | + | - |
| <i>Egf</i>           | + | - |
| <i>Egfl6</i>         | + | - |
| <i>Egflam</i>        | + | - |
| <i>Egfr</i>          | + | - |
| <i>Egln3</i>         | + | - |
| <i>Egr3</i>          | + | - |
| <i>Egr4</i>          | + | - |
| <i>Eid2</i>          | + | - |
| <i>Elane</i>         | + | - |
| <i>Elavl3</i>        | + | - |
| <i>Elf5</i>          | + | - |
| <i>Elfn1</i>         | + | - |

|                  |   |   |
|------------------|---|---|
| <i>Elfn2</i>     | + | - |
| <i>Elmod1</i>    | + | - |
| <i>Eln</i>       | + | - |
| <i>Elovl2</i>    | + | - |
| <i>Elovl3</i>    | + | - |
| <i>Elovl4</i>    | + | - |
| <i>Emilin2</i>   | + | - |
| <i>Emilin3</i>   | + | - |
| <i>Eml1</i>      | + | - |
| <i>Emp1</i>      | + | - |
| <i>Emp2</i>      | + | - |
| <i>Emx1</i>      | + | - |
| <i>Emx2</i>      | + | - |
| <i>Emx2os</i>    | + | - |
| <i>En1</i>       | + | - |
| <i>En2</i>       | + | - |
| <i>Enah</i>      | + | - |
| <i>Enho</i>      | + | - |
| <i>Eno2</i>      | + | - |
| <i>Enox1</i>     | + | - |
| <i>Enpp2</i>     | + | - |
| <i>Enpp4</i>     | + | - |
| <i>Enpp5</i>     | + | - |
| <i>Enpp7</i>     | + | - |
| <i>Enthd1</i>    | + | - |
| <i>Entpd2</i>    | + | - |
| <i>Entpd3</i>    | + | - |
| <i>Eomes</i>     | + | - |
| <i>Epb4.111</i>  | + | - |
| <i>Epb4.114a</i> | + | - |
| <i>Epb4.114b</i> | + | - |
| <i>Epb4.9</i>    | + | - |
| <i>Epdr1</i>     | + | - |
| <i>Epha1</i>     | + | - |
| <i>Epha10</i>    | + | - |
| <i>Epha2</i>     | + | - |
| <i>Epha4</i>     | + | - |
| <i>Epha7</i>     | + | - |
| <i>Epha8</i>     | + | - |
| <i>Ephb1</i>     | + | - |
| <i>Ephb2</i>     | + | - |
| <i>Ephb3</i>     | + | - |
| <i>Ephb4</i>     | + | - |
| <i>Ephb6</i>     | + | - |
| <i>Ephx3</i>     | + | - |
| <i>Ephx4</i>     | + | - |
| <i>Epn3</i>      | + | - |
| <i>Epo</i>       | + | - |
| <i>Epor</i>      | + | - |
| <i>Eps8</i>      | + | - |
| <i>Eps8l1</i>    | + | - |
| <i>Eras</i>      | + | - |
| <i>Erb2</i>      | + | - |

|                      |   |   |
|----------------------|---|---|
| <i>Erb4</i>          | + | - |
| <i>Erc2</i>          | + | - |
| <i>Erich2</i>        | + | - |
| <i>Ermap</i>         | + | - |
| <i>Ermn</i>          | + | - |
| <i>Ern2</i>          | + | - |
| <i>Errfi1</i>        | + | - |
| <i>Esam</i>          | + | - |
| <i>Esm1</i>          | + | - |
| <i>Esrp1</i>         | + | - |
| <i>Esrp2</i>         | + | - |
| <i>Esrrb</i>         | + | - |
| <i>Esrrg</i>         | + | - |
| <i>Esx1</i>          | + | - |
| <i>Esyt3</i>         | + | - |
| <i>Etnk2</i>         | + | - |
| <i>Etv1</i>          | + | - |
| <i>Etv2</i>          | + | - |
| <i>Eva1c</i>         | + | - |
| <i>Evi5</i>          | + | - |
| <i>Evpl</i>          | + | - |
| <i>Evx1</i>          | + | - |
| <i>Evx2</i>          | + | - |
| <i>Exoc3l4</i>       | + | - |
| <i>Exph5</i>         | + | - |
| <i>Eya2</i>          | + | - |
| <i>F11r</i>          | + | - |
| <i>F12</i>           | + | - |
| <i>F2r</i>           | + | - |
| <i>F2rl1</i>         | + | - |
| <i>F3</i>            | + | - |
| <i>F5</i>            | + | - |
| <i>F730035M05Rik</i> | + | - |
| <i>F830045P16Rik</i> | + | - |
| <i>F930015N05Rik</i> | + | - |
| <i>Fa2h</i>          | + | - |
| <i>Fabp2</i>         | + | - |
| <i>Fabp3</i>         | + | - |
| <i>Fabp7</i>         | + | - |
| <i>Fads6</i>         | + | - |
| <i>Fam101a</i>       | + | - |
| <i>Fam102b</i>       | + | - |
| <i>Fam109b</i>       | + | - |
| <i>Fam110b</i>       | + | - |
| <i>Fam110c</i>       | + | - |
| <i>Fam124a</i>       | + | - |
| <i>Fam124b</i>       | + | - |
| <i>Fam129b</i>       | + | - |
| <i>Fam131c</i>       | + | - |
| <i>Fam135a</i>       | + | - |
| <i>Fam149a</i>       | + | - |
| <i>Fam150a</i>       | + | - |
| <i>Fam150b</i>       | + | - |

|                 |   |   |
|-----------------|---|---|
| <i>Fam159a</i>  | + | - |
| <i>Fam159b</i>  | + | - |
| <i>Fam163a</i>  | + | - |
| <i>Fam163b</i>  | + | - |
| <i>Fam166b</i>  | + | - |
| <i>Fam169a</i>  | + | - |
| <i>Fam169b</i>  | + | - |
| <i>Fam171a1</i> | + | - |
| <i>Fam171a2</i> | + | - |
| <i>Fam171b</i>  | + | - |
| <i>Fam174b</i>  | + | - |
| <i>Fam181a</i>  | + | - |
| <i>Fam181b</i>  | + | - |
| <i>Fam183b</i>  | + | - |
| <i>Fam184a</i>  | + | - |
| <i>Fam184b</i>  | + | - |
| <i>Fam186b</i>  | + | - |
| <i>Fam187a</i>  | + | - |
| <i>Fam188b</i>  | + | - |
| <i>Fam189a1</i> | + | - |
| <i>Fam189a2</i> | + | - |
| <i>Fam194a</i>  | + | - |
| <i>Fam198b</i>  | + | - |
| <i>Fam19a2</i>  | + | - |
| <i>Fam19a3</i>  | + | - |
| <i>Fam19a4</i>  | + | - |
| <i>Fam20a</i>   | + | - |
| <i>Fam20c</i>   | + | - |
| <i>Fam211b</i>  | + | - |
| <i>Fam213a</i>  | + | - |
| <i>Fam217a</i>  | + | - |
| <i>Fam26d</i>   | + | - |
| <i>Fam43b</i>   | + | - |
| <i>Fam46b</i>   | + | - |
| <i>Fam57b</i>   | + | - |
| <i>Fam69b</i>   | + | - |
| <i>Fam69c</i>   | + | - |
| <i>Fam71a</i>   | + | - |
| <i>Fam71e2</i>  | + | - |
| <i>Fam71f1</i>  | + | - |
| <i>Fam78b</i>   | + | - |
| <i>Fam81a</i>   | + | - |
| <i>Fam83a</i>   | + | - |
| <i>Fam84a</i>   | + | - |
| <i>Fam89a</i>   | + | - |
| <i>Fam92b</i>   | + | - |
| <i>Farp1</i>    | + | - |
| <i>Fat4</i>     | + | - |
| <i>Faxc</i>     | + | - |
| <i>Fblim1</i>   | + | - |
| <i>Fbl1</i>     | + | - |
| <i>Fbln1</i>    | + | - |
| <i>Fbln2</i>    | + | - |

|               |   |   |
|---------------|---|---|
| <i>Fbln5</i>  | + | - |
| <i>Fbln7</i>  | + | - |
| <i>Fbn1</i>   | + | - |
| <i>Fbp1</i>   | + | - |
| <i>Fbxl16</i> | + | - |
| <i>Fbxl2</i>  | + | - |
| <i>Fbxo10</i> | + | - |
| <i>Fbxo16</i> | + | - |
| <i>Fbxo17</i> | + | - |
| <i>Fbxo27</i> | + | - |
| <i>Fbxo39</i> | + | - |
| <i>Fbxo41</i> | + | - |
| <i>Fcgbp</i>  | + | - |
| <i>Fcgr1</i>  | + | - |
| <i>Fcrls</i>  | + | - |
| <i>Fendrr</i> | + | - |
| <i>Fer1l4</i> | + | - |
| <i>Ferd3l</i> | + | - |
| <i>Fermt1</i> | + | - |
| <i>Fermt2</i> | + | - |
| <i>Fev</i>    | + | - |
| <i>Fezf1</i>  | + | - |
| <i>Fezf2</i>  | + | - |
| <i>Ffar4</i>  | + | - |
| <i>Fgd1</i>   | + | - |
| <i>Fgf12</i>  | + | - |
| <i>Fgf15</i>  | + | - |
| <i>Fgf16</i>  | + | - |
| <i>Fgf17</i>  | + | - |
| <i>Fgf18</i>  | + | - |
| <i>Fgf2</i>   | + | - |
| <i>Fgf20</i>  | + | - |
| <i>Fgf21</i>  | + | - |
| <i>Fgf23</i>  | + | - |
| <i>Fgf3</i>   | + | - |
| <i>Fgf4</i>   | + | - |
| <i>Fgf5</i>   | + | - |
| <i>Fgf8</i>   | + | - |
| <i>Fgf9</i>   | + | - |
| <i>Fgfr1</i>  | + | - |
| <i>Fgfr2</i>  | + | - |
| <i>Fgfr3</i>  | + | - |
| <i>Fgfr4</i>  | + | - |
| <i>Fhad1</i>  | + | - |
| <i>Fhdc1</i>  | + | - |
| <i>Fhl1</i>   | + | - |
| <i>Fhl2</i>   | + | - |
| <i>Fhod3</i>  | + | - |
| <i>Fibcd1</i> | + | - |
| <i>Figf</i>   | + | - |
| <i>Figl2</i>  | + | - |
| <i>Filip1</i> | + | - |
| <i>Fjx1</i>   | + | - |

|                |   |   |
|----------------|---|---|
| <i>Fkbp10</i>  | + | - |
| <i>Fkbp9</i>   | + | - |
| <i>Flnc</i>    | + | - |
| <i>Flrt2</i>   | + | - |
| <i>Flt1</i>    | + | - |
| <i>Flt4</i>    | + | - |
| <i>Flywch2</i> | + | - |
| <i>Fmnl2</i>   | + | - |
| <i>Fn1</i>     | + | - |
| <i>Fn3k</i>    | + | - |
| <i>Fnbp1l</i>  | + | - |
| <i>Fndc3b</i>  | + | - |
| <i>Fndc3c1</i> | + | - |
| <i>Fndc4</i>   | + | - |
| <i>Fndc5</i>   | + | - |
| <i>Fnip2</i>   | + | - |
| <i>Folr2</i>   | + | - |
| <i>Foxa1</i>   | + | - |
| <i>Foxa2</i>   | + | - |
| <i>Foxb1</i>   | + | - |
| <i>Foxb2</i>   | + | - |
| <i>Foxc1</i>   | + | - |
| <i>Foxd1</i>   | + | - |
| <i>Foxd3</i>   | + | - |
| <i>Foxd4</i>   | + | - |
| <i>Foxe1</i>   | + | - |
| <i>Foxe3</i>   | + | - |
| <i>Foxf1</i>   | + | - |
| <i>Foxf2</i>   | + | - |
| <i>Foxg1</i>   | + | - |
| <i>Foxi2</i>   | + | - |
| <i>Foxi3</i>   | + | - |
| <i>Foxj1</i>   | + | - |
| <i>Foxl1</i>   | + | - |
| <i>Foxl2</i>   | + | - |
| <i>Foxl2os</i> | + | - |
| <i>Foxn4</i>   | + | - |
| <i>Foxo6</i>   | + | - |
| <i>Foxp2</i>   | + | - |
| <i>Foxq1</i>   | + | - |
| <i>Foxr2</i>   | + | - |
| <i>Fras1</i>   | + | - |
| <i>Frem2</i>   | + | - |
| <i>Frmd4b</i>  | + | - |
| <i>Frmd5</i>   | + | - |
| <i>Frmpd1</i>  | + | - |
| <i>Frrs1l</i>  | + | - |
| <i>Frs3</i>    | + | - |
| <i>Fry</i>     | + | - |
| <i>Frzb</i>    | + | - |
| <i>Fscn1</i>   | + | - |
| <i>Fsd1</i>    | + | - |
| <i>Fsd1l</i>   | + | - |

|                      |   |   |
|----------------------|---|---|
| <i>Fsd2</i>          | + | - |
| <i>Fst</i>           | + | - |
| <i>Fstl1</i>         | + | - |
| <i>Fstl3</i>         | + | - |
| <i>Fstl4</i>         | + | - |
| <i>Fut1</i>          | + | - |
| <i>Fut10</i>         | + | - |
| <i>Fut4-ps1</i>      | + | - |
| <i>Fxyd1</i>         | + | - |
| <i>Fxyd2</i>         | + | - |
| <i>Fxyd6</i>         | + | - |
| <i>Fxyd7</i>         | + | - |
| <i>Fyb</i>           | + | - |
| <i>Fzd1</i>          | + | - |
| <i>Fzd10</i>         | + | - |
| <i>Fzd2</i>          | + | - |
| <i>Fzd3</i>          | + | - |
| <i>Fzd6</i>          | + | - |
| <i>Fzd8</i>          | + | - |
| <i>Fzd9</i>          | + | - |
| <i>G530011O06Rik</i> | + | - |
| <i>G630025P09Rik</i> | + | - |
| <i>G630071F17Rik</i> | + | - |
| <i>G630090E17Rik</i> | + | - |
| <i>Gab1</i>          | + | - |
| <i>Gab2</i>          | + | - |
| <i>Gabbr2</i>        | + | - |
| <i>Gabrd</i>         | + | - |
| <i>Gad1</i>          | + | - |
| <i>Gad2</i>          | + | - |
| <i>Gal</i>           | + | - |
| <i>Gal3st1</i>       | + | - |
| <i>Gal3st3</i>       | + | - |
| <i>Gal3st4</i>       | + | - |
| <i>Galm</i>          | + | - |
| <i>Galnt14</i>       | + | - |
| <i>Galnt16</i>       | + | - |
| <i>Galnt18</i>       | + | - |
| <i>Galnt3</i>        | + | - |
| <i>Galnt9</i>        | + | - |
| <i>Galr1</i>         | + | - |
| <i>Galr2</i>         | + | - |
| <i>Galr3</i>         | + | - |
| <i>Garem</i>         | + | - |
| <i>Gareml</i>        | + | - |
| <i>Gas1</i>          | + | - |
| <i>Gas2l2</i>        | + | - |
| <i>Gas6</i>          | + | - |
| <i>Gast</i>          | + | - |
| <i>Gata2</i>         | + | - |
| <i>Gata4</i>         | + | - |
| <i>Gata5</i>         | + | - |
| <i>Gata6</i>         | + | - |



|                |   |   |
|----------------|---|---|
| <i>Gbgt1</i>   | + | - |
| <i>Gbx1</i>    | + | - |
| <i>Gbx2</i>    | + | - |
| <i>Gcat</i>    | + | - |
| <i>Gcgr</i>    | + | - |
| <i>Gckr</i>    | + | - |
| <i>Gcm2</i>    | + | - |
| <i>Gcnt2</i>   | + | - |
| <i>Gcnt3</i>   | + | - |
| <i>Gcnt4</i>   | + | - |
| <i>Gda</i>     | + | - |
| <i>Gdap111</i> | + | - |
| <i>Gdf1</i>    | + | - |
| <i>Gdf3</i>    | + | - |
| <i>Gdf5</i>    | + | - |
| <i>Gdf6</i>    | + | - |
| <i>Gdf7</i>    | + | - |
| <i>Gdnf</i>    | + | - |
| <i>Gdpd1</i>   | + | - |
| <i>Gfap</i>    | + | - |
| <i>Gfi1b</i>   | + | - |
| <i>Gfpt2</i>   | + | - |
| <i>Gfra1</i>   | + | - |
| <i>Gfra2</i>   | + | - |
| <i>Gfra3</i>   | + | - |
| <i>Gfra4</i>   | + | - |
| <i>Ggt6</i>    | + | - |
| <i>Ggt7</i>    | + | - |
| <i>Ghr</i>     | + | - |
| <i>Ghrh</i>    | + | - |
| <i>Ghsr</i>    | + | - |
| <i>Gip</i>     | + | - |
| <i>Gipc2</i>   | + | - |
| <i>Gipr</i>    | + | - |
| <i>Gja10</i>   | + | - |
| <i>Gja3</i>    | + | - |
| <i>Gja4</i>    | + | - |
| <i>Gjb2</i>    | + | - |
| <i>Gjb3</i>    | + | - |
| <i>Gjb6</i>    | + | - |
| <i>Gjc1</i>    | + | - |
| <i>Gjc2</i>    | + | - |
| <i>Gjd2</i>    | + | - |
| <i>Gjd3</i>    | + | - |
| <i>Gje1</i>    | + | - |
| <i>Gkn1</i>    | + | - |
| <i>Gkn2</i>    | + | - |
| <i>Gkn3</i>    | + | - |
| <i>Gldc</i>    | + | - |
| <i>Gli1</i>    | + | - |
| <i>Gli2</i>    | + | - |
| <i>Gli3</i>    | + | - |
| <i>Glis1</i>   | + | - |

|                |   |   |
|----------------|---|---|
| <i>Glis2</i>   | + | - |
| <i>Glis3</i>   | + | - |
| <i>Glp1r</i>   | + | - |
| <i>Glr</i>     | + | - |
| <i>Glt1d1</i>  | + | - |
| <i>Glt25d2</i> | + | - |
| <i>Glt8d2</i>  | + | - |
| <i>Glyat</i>   | + | - |
| <i>Gm10190</i> | + | - |
| <i>Gm10421</i> | + | - |
| <i>Gm10510</i> | + | - |
| <i>Gm10549</i> | + | - |
| <i>Gm10653</i> | + | - |
| <i>Gm10664</i> | + | - |
| <i>Gm10684</i> | + | - |
| <i>Gm10768</i> | + | - |
| <i>Gm1078</i>  | + | - |
| <i>Gm10789</i> | + | - |
| <i>Gm10857</i> | + | - |
| <i>Gm10863</i> | + | - |
| <i>Gm11127</i> | + | - |
| <i>Gm11190</i> | + | - |
| <i>Gm11437</i> | + | - |
| <i>Gm11529</i> | + | - |
| <i>Gm11549</i> | + | - |
| <i>Gm11627</i> | + | - |
| <i>Gm11744</i> | + | - |
| <i>Gm11762</i> | + | - |
| <i>Gm11837</i> | + | - |
| <i>Gm11961</i> | + | - |
| <i>Gm11992</i> | + | - |
| <i>Gm12</i>    | + | - |
| <i>Gm12159</i> | + | - |
| <i>Gm12169</i> | + | - |
| <i>Gm12409</i> | + | - |
| <i>Gm12709</i> | + | - |
| <i>Gm12830</i> | + | - |
| <i>Gm13285</i> | + | - |
| <i>Gm13287</i> | + | - |
| <i>Gm13288</i> | + | - |
| <i>Gm13289</i> | + | - |
| <i>Gm13290</i> | + | - |
| <i>Gm1332</i>  | + | - |
| <i>Gm13546</i> | + | - |
| <i>Gm136</i>   | + | - |
| <i>Gm13807</i> | + | - |
| <i>Gm13889</i> | + | - |
| <i>Gm13939</i> | + | - |
| <i>Gm14169</i> | + | - |
| <i>Gm14204</i> | + | - |
| <i>Gm14207</i> | + | - |
| <i>Gm14318</i> | + | - |
| <i>Gm14496</i> | + | - |

|         |   |   |
|---------|---|---|
| Gm14858 | + | - |
| Gm14873 | + | - |
| Gm15179 | + | - |
| Gm1564  | + | - |
| Gm15698 | + | - |
| Gm15915 | + | - |
| Gm16065 | + | - |
| Gm16197 | + | - |
| Gm1631  | + | - |
| Gm16336 | + | - |
| Gm1647  | + | - |
| Gm16548 | + | - |
| Gm16551 | + | - |
| Gm16596 | + | - |
| Gm16617 | + | - |
| Gm16701 | + | - |
| Gm16702 | + | - |
| Gm16793 | + | - |
| Gm1715  | + | - |
| Gm17769 | + | - |
| Gm19345 | + | - |
| Gm19402 | + | - |
| Gm19424 | + | - |
| Gm19466 | + | - |
| Gm19689 | + | - |
| Gm19990 | + | - |
| Gm20554 | + | - |
| Gm2061  | + | - |
| Gm20748 | + | - |
| Gm20755 | + | - |
| Gm20759 | + | - |
| Gm2109  | + | - |
| Gm2115  | + | - |
| Gm266   | + | - |
| Gm2694  | + | - |
| Gm4349  | + | - |
| Gm4952  | + | - |
| Gm4980  | + | - |
| Gm5089  | + | - |
| Gm5105  | + | - |
| Gm5108  | + | - |
| Gm5111  | + | - |
| Gm5148  | + | - |
| Gm5176  | + | - |
| Gm5294  | + | - |
| Gm53    | + | - |
| Gm5607  | + | - |
| Gm572   | + | - |
| Gm581   | + | - |
| Gm5833  | + | - |
| Gm5878  | + | - |
| Gm609   | + | - |
| Gm6277  | + | - |

|                |   |   |
|----------------|---|---|
| <i>Gm6307</i>  | + | - |
| <i>Gm6432</i>  | + | - |
| <i>Gm6525</i>  | + | - |
| <i>Gm6623</i>  | + | - |
| <i>Gm6772</i>  | + | - |
| <i>Gm694</i>   | + | - |
| <i>Gm715</i>   | + | - |
| <i>Gm7325</i>  | + | - |
| <i>Gm757</i>   | + | - |
| <i>Gm8234</i>  | + | - |
| <i>Gm8439</i>  | + | - |
| <i>Gm8773</i>  | + | - |
| <i>Gm8801</i>  | + | - |
| <i>Gm884</i>   | + | - |
| <i>Gm9047</i>  | + | - |
| <i>Gm960</i>   | + | - |
| <i>Gm973</i>   | + | - |
| <i>Gm9767</i>  | + | - |
| <i>Gm9899</i>  | + | - |
| <i>Gm996</i>   | + | - |
| <i>Gm9999</i>  | + | - |
| <i>Gmpr</i>    | + | - |
| <i>Gna14</i>   | + | - |
| <i>Gnai1</i>   | + | - |
| <i>Gnal</i>    | + | - |
| <i>Gnao1</i>   | + | - |
| <i>Gnat1</i>   | + | - |
| <i>Gng13</i>   | + | - |
| <i>Gng4</i>    | + | - |
| <i>Gng8</i>    | + | - |
| <i>Gnrhr</i>   | + | - |
| <i>Golga7b</i> | + | - |
| <i>Got111</i>  | + | - |
| <i>Gp1ba</i>   | + | - |
| <i>Gp1bb</i>   | + | - |
| <i>Gp5</i>     | + | - |
| <i>Gpc1</i>    | + | - |
| <i>Gpc2</i>    | + | - |
| <i>Gpc3</i>    | + | - |
| <i>Gpc5</i>    | + | - |
| <i>Gpld1</i>   | + | - |
| <i>Gpm6b</i>   | + | - |
| <i>Gpnmb</i>   | + | - |
| <i>Gpr114</i>  | + | - |
| <i>Gpr12</i>   | + | - |
| <i>Gpr123</i>  | + | - |
| <i>Gpr124</i>  | + | - |
| <i>Gpr125</i>  | + | - |
| <i>Gpr126</i>  | + | - |
| <i>Gpr142</i>  | + | - |
| <i>Gpr150</i>  | + | - |
| <i>Gpr153</i>  | + | - |
| <i>Gpr156</i>  | + | - |

|                |   |   |
|----------------|---|---|
| <i>Gpr162</i>  | + | - |
| <i>Gpr173</i>  | + | - |
| <i>Gpr176</i>  | + | - |
| <i>Gpr179</i>  | + | - |
| <i>Gpr20</i>   | + | - |
| <i>Gpr25</i>   | + | - |
| <i>Gpr27</i>   | + | - |
| <i>Gpr37</i>   | + | - |
| <i>Gpr4</i>    | + | - |
| <i>Gpr45</i>   | + | - |
| <i>Gpr50</i>   | + | - |
| <i>Gpr56</i>   | + | - |
| <i>Gpr6</i>    | + | - |
| <i>Gpr62</i>   | + | - |
| <i>Gpr63</i>   | + | - |
| <i>Gpr64</i>   | + | - |
| <i>Gpr68</i>   | + | - |
| <i>Gpr75</i>   | + | - |
| <i>Gpr81</i>   | + | - |
| <i>Gpr83</i>   | + | - |
| <i>Gpr85</i>   | + | - |
| <i>Gpr88</i>   | + | - |
| <i>Gpr97</i>   | + | - |
| <i>Gpr98</i>   | + | - |
| <i>Gprc5a</i>  | + | - |
| <i>Gprc5b</i>  | + | - |
| <i>Gprc5c</i>  | + | - |
| <i>Gprin1</i>  | + | - |
| <i>Gprin2</i>  | + | - |
| <i>Gpx3</i>    | + | - |
| <i>Gpx7</i>    | + | - |
| <i>Gpx8</i>    | + | - |
| <i>Grb10</i>   | + | - |
| <i>Grb14</i>   | + | - |
| <i>Grb7</i>    | + | - |
| <i>Greb1</i>   | + | - |
| <i>Greb1l</i>  | + | - |
| <i>Grem1</i>   | + | - |
| <i>Grhl2</i>   | + | - |
| <i>Grhl3</i>   | + | - |
| <i>Gria2</i>   | + | - |
| <i>Gria3</i>   | + | - |
| <i>Grid1</i>   | + | - |
| <i>Grid2ip</i> | + | - |
| <i>Grik3</i>   | + | - |
| <i>Grik4</i>   | + | - |
| <i>Grik5</i>   | + | - |
| <i>Grin1</i>   | + | - |
| <i>Grin2c</i>  | + | - |
| <i>Grin2d</i>  | + | - |
| <i>Grin3a</i>  | + | - |
| <i>Grin3b</i>  | + | - |
| <i>Grip1</i>   | + | - |

|                |   |   |
|----------------|---|---|
| <i>Grip2</i>   | + | - |
| <i>Grm1</i>    | + | - |
| <i>Grm2</i>    | + | - |
| <i>Grm8</i>    | + | - |
| <i>Grp</i>     | + | - |
| <i>Grrp1</i>   | + | - |
| <i>Gsc</i>     | + | - |
| <i>Gsc2</i>    | + | - |
| <i>Gsdma</i>   | + | - |
| <i>Gsdma2</i>  | + | - |
| <i>Gsdma3</i>  | + | - |
| <i>Gsg1l</i>   | + | - |
| <i>Gspt2</i>   | + | - |
| <i>Gsta4</i>   | + | - |
| <i>Gstk1</i>   | + | - |
| <i>Gstm1</i>   | + | - |
| <i>Gstm5</i>   | + | - |
| <i>Gsx1</i>    | + | - |
| <i>Gsx2</i>    | + | - |
| <i>Gtdc2</i>   | + | - |
| <i>Gtsf1</i>   | + | - |
| <i>Guca1a</i>  | + | - |
| <i>Gucy1a2</i> | + | - |
| <i>Gucy1b3</i> | + | - |
| <i>Gucy2c</i>  | + | - |
| <i>Gucy2d</i>  | + | - |
| <i>Gucy2e</i>  | + | - |
| <i>Gucy2g</i>  | + | - |
| <i>Gxylt2</i>  | + | - |
| <i>H19</i>     | + | - |
| <i>H2-M5</i>   | + | - |
| <i>H2-Q1</i>   | + | - |
| <i>H2-Q10</i>  | + | - |
| <i>H2-T3</i>   | + | - |
| <i>H2afy2</i>  | + | - |
| <i>Hand1</i>   | + | - |
| <i>Hand2</i>   | + | - |
| <i>Hapln1</i>  | + | - |
| <i>Hapln2</i>  | + | - |
| <i>Hapln3</i>  | + | - |
| <i>Hapln4</i>  | + | - |
| <i>Has1</i>    | + | - |
| <i>Has2</i>    | + | - |
| <i>Has2as</i>  | + | - |
| <i>Has3</i>    | + | - |
| <i>Hba-a1</i>  | + | - |
| <i>Hba-a2</i>  | + | - |
| <i>Hba-x</i>   | + | - |
| <i>Hbb-bh2</i> | + | - |
| <i>Hbb-y</i>   | + | - |
| <i>Hbq1a</i>   | + | - |
| <i>Hbq1b</i>   | + | - |
| <i>Hck</i>     | + | - |

|                  |   |   |
|------------------|---|---|
| <i>Hcn1</i>      | + | - |
| <i>Hcn2</i>      | + | - |
| <i>Hcn3</i>      | + | - |
| <i>Hcn4</i>      | + | - |
| <i>Hcrtr1</i>    | + | - |
| <i>Hcrtr2</i>    | + | - |
| <i>Hdgfrp3</i>   | + | - |
| <i>Hebp2</i>     | + | - |
| <i>Hecw1</i>     | + | - |
| <i>Hecw2</i>     | + | - |
| <i>Helt</i>      | + | - |
| <i>Hepacam2</i>  | + | - |
| <i>Hes2</i>      | + | - |
| <i>Hes3</i>      | + | - |
| <i>Hesx1</i>     | + | - |
| <i>Hey2</i>      | + | - |
| <i>Heyl</i>      | + | - |
| <i>Hfe2</i>      | + | - |
| <i>Hfm1</i>      | + | - |
| <i>Hgd</i>       | + | - |
| <i>Hhip</i>      | + | - |
| <i>Hhipl1</i>    | + | - |
| <i>Hic1</i>      | + | - |
| <i>Hid1</i>      | + | - |
| <i>Higd1b</i>    | + | - |
| <i>Hist1h2aa</i> | + | - |
| <i>Hist1h2ai</i> | + | - |
| <i>Hist1h2ba</i> | + | - |
| <i>Hist1h2bl</i> | + | - |
| <i>Hist1h3h</i>  | + | - |
| <i>Hivep3</i>    | + | - |
| <i>Hlf</i>       | + | - |
| <i>Hmcn1</i>     | + | - |
| <i>Hmga2</i>     | + | - |
| <i>Hmx1</i>      | + | - |
| <i>Hmx3</i>      | + | - |
| <i>Hnf1a</i>     | + | - |
| <i>Hnf1b</i>     | + | - |
| <i>Hnrp11</i>    | + | - |
| <i>Hoga1</i>     | + | - |
| <i>Homer2</i>    | + | - |
| <i>Hotair</i>    | + | - |
| <i>Hoxa1</i>     | + | - |
| <i>Hoxa10</i>    | + | - |
| <i>Hoxa11</i>    | + | - |
| <i>Hoxa11as</i>  | + | - |
| <i>Hoxa13</i>    | + | - |
| <i>Hoxa2</i>     | + | - |
| <i>Hoxa3</i>     | + | - |
| <i>Hoxa4</i>     | + | - |
| <i>Hoxa5</i>     | + | - |
| <i>Hoxa6</i>     | + | - |
| <i>Hoxa7</i>     | + | - |

|                 |   |   |
|-----------------|---|---|
| <i>Hoxa9</i>    | + | - |
| <i>Hoxb1</i>    | + | - |
| <i>Hoxb13</i>   | + | - |
| <i>Hoxb2</i>    | + | - |
| <i>Hoxb3</i>    | + | - |
| <i>Hoxb5</i>    | + | - |
| <i>Hoxb6</i>    | + | - |
| <i>Hoxb7</i>    | + | - |
| <i>Hoxb8</i>    | + | - |
| <i>Hoxb9</i>    | + | - |
| <i>Hoxc10</i>   | + | - |
| <i>Hoxc11</i>   | + | - |
| <i>Hoxc12</i>   | + | - |
| <i>Hoxc13</i>   | + | - |
| <i>Hoxc4</i>    | + | - |
| <i>Hoxc5</i>    | + | - |
| <i>Hoxc6</i>    | + | - |
| <i>Hoxc8</i>    | + | - |
| <i>Hoxc9</i>    | + | - |
| <i>Hoxd1</i>    | + | - |
| <i>Hoxd10</i>   | + | - |
| <i>Hoxd11</i>   | + | - |
| <i>Hoxd12</i>   | + | - |
| <i>Hoxd13</i>   | + | - |
| <i>Hoxd3</i>    | + | - |
| <i>Hoxd4</i>    | + | - |
| <i>Hoxd8</i>    | + | - |
| <i>Hoxd9</i>    | + | - |
| <i>Hpca</i>     | + | - |
| <i>Hpcal4</i>   | + | - |
| <i>Hpse2</i>    | + | - |
| <i>Hr</i>       | + | - |
| <i>Hrasls5</i>  | + | - |
| <i>Hrh1</i>     | + | - |
| <i>Hrh2</i>     | + | - |
| <i>Hrh3</i>     | + | - |
| <i>Hrk</i>      | + | - |
| <i>Hs3st2</i>   | + | - |
| <i>Hs3st3a1</i> | + | - |
| <i>Hs3st6</i>   | + | - |
| <i>Hs6st3</i>   | + | - |
| <i>Hsd17b1</i>  | + | - |
| <i>Hsd17b13</i> | + | - |
| <i>Hsf4</i>     | + | - |
| <i>Hspa12b</i>  | + | - |
| <i>Hspb1</i>    | + | - |
| <i>Hspb2</i>    | + | - |
| <i>Hspg2</i>    | + | - |
| <i>Htr1b</i>    | + | - |
| <i>Htr1d</i>    | + | - |
| <i>Htr2a</i>    | + | - |
| <i>Htr3b</i>    | + | - |
| <i>Htr5b</i>    | + | - |



|                |   |   |
|----------------|---|---|
| <i>Htr6</i>    | + | - |
| <i>Htr7</i>    | + | - |
| <i>Htra1</i>   | + | - |
| <i>Htra3</i>   | + | - |
| <i>Htra4</i>   | + | - |
| <i>Hunk</i>    | + | - |
| <i>Ica1</i>    | + | - |
| <i>Ica1l</i>   | + | - |
| <i>Icos</i>    | + | - |
| <i>Id1</i>     | + | - |
| <i>Id4</i>     | + | - |
| <i>Iffo2</i>   | + | - |
| <i>Ifit1</i>   | + | - |
| <i>Ifitm1</i>  | + | - |
| <i>Ifitm10</i> | + | - |
| <i>Ifitm2</i>  | + | - |
| <i>Ifitm3</i>  | + | - |
| <i>Ifitm7</i>  | + | - |
| <i>Ifnab</i>   | + | - |
| <i>Ift81</i>   | + | - |
| <i>Igdcc3</i>  | + | - |
| <i>Igdcc4</i>  | + | - |
| <i>Igf1</i>    | + | - |
| <i>Igf1r</i>   | + | - |
| <i>Igf2</i>    | + | - |
| <i>Igf2as</i>  | + | - |
| <i>Igf2bp1</i> | + | - |
| <i>Igf2bp2</i> | + | - |
| <i>Igfbp2</i>  | + | - |
| <i>Igfbp3</i>  | + | - |
| <i>Igfbp4</i>  | + | - |
| <i>Igfbp5</i>  | + | - |
| <i>Igfbp6</i>  | + | - |
| <i>Igfbp7</i>  | + | - |
| <i>Igfbpl1</i> | + | - |
| <i>Igfn1</i>   | + | - |
| <i>Igll1</i>   | + | - |
| <i>Iglon5</i>  | + | - |
| <i>Igsf11</i>  | + | - |
| <i>Igsf21</i>  | + | - |
| <i>Igsf3</i>   | + | - |
| <i>Igsf5</i>   | + | - |
| <i>Igsf9b</i>  | + | - |
| <i>Ihh</i>     | + | - |
| <i>Ikzf2</i>   | + | - |
| <i>Ikzf4</i>   | + | - |
| <i>Il10</i>    | + | - |
| <i>Il11</i>    | + | - |
| <i>Il12b</i>   | + | - |
| <i>Il12rb2</i> | + | - |
| <i>Il13ra1</i> | + | - |
| <i>Il17b</i>   | + | - |
| <i>Il17rb</i>  | + | - |

|                |   |   |
|----------------|---|---|
| <i>ll17rc</i>  | + | - |
| <i>ll17re</i>  | + | - |
| <i>ll18r1</i>  | + | - |
| <i>ll1a</i>    | + | - |
| <i>ll1f10</i>  | + | - |
| <i>ll1r1</i>   | + | - |
| <i>ll1rn</i>   | + | - |
| <i>ll20ra</i>  | + | - |
| <i>ll22ra1</i> | + | - |
| <i>ll25</i>    | + | - |
| <i>ll31</i>    | + | - |
| <i>ll31ra</i>  | + | - |
| <i>ll33</i>    | + | - |
| <i>ll5</i>     | + | - |
| <i>ll5ra</i>   | + | - |
| <i>lldr2</i>   | + | - |
| <i>lna</i>     | + | - |
| <i>lnadl</i>   | + | - |
| <i>lnha</i>    | + | - |
| <i>lnhba</i>   | + | - |
| <i>lnhbb</i>   | + | - |
| <i>lnhbe</i>   | + | - |
| <i>lnsc</i>    | + | - |
| <i>lnsl3</i>   | + | - |
| <i>lnsm1</i>   | + | - |
| <i>lnsm2</i>   | + | - |
| <i>lnsrr</i>   | + | - |
| <i>intu</i>    | + | - |
| <i>lqcf5</i>   | + | - |
| <i>lqgap2</i>  | + | - |
| <i>lqsec2</i>  | + | - |
| <i>lrf6</i>    | + | - |
| <i>lrg1</i>    | + | - |
| <i>lrs1</i>    | + | - |
| <i>lrs3</i>    | + | - |
| <i>lrs4</i>    | + | - |
| <i>lrx1</i>    | + | - |
| <i>lrx2</i>    | + | - |
| <i>lrx3</i>    | + | - |
| <i>lrx4</i>    | + | - |
| <i>lrx5</i>    | + | - |
| <i>lsl1</i>    | + | - |
| <i>lsl2</i>    | + | - |
| <i>lsm1</i>    | + | - |
| <i>ltga1</i>   | + | - |
| <i>ltga11</i>  | + | - |
| <i>ltga2b</i>  | + | - |
| <i>ltga3</i>   | + | - |
| <i>ltga5</i>   | + | - |
| <i>ltga7</i>   | + | - |
| <i>ltga8</i>   | + | - |
| <i>ltga9</i>   | + | - |
| <i>ltgb7</i>   | + | - |

|                |   |   |
|----------------|---|---|
| <i>Itgb8</i>   | + | - |
| <i>Itpr1l2</i> | + | - |
| <i>Izumo1</i>  | + | - |
| <i>Jag2</i>    | + | - |
| <i>Jakmip3</i> | + | - |
| <i>Jam2</i>    | + | - |
| <i>Jam3</i>    | + | - |
| <i>Jph1</i>    | + | - |
| <i>Jph3</i>    | + | - |
| <i>Jph4</i>    | + | - |
| <i>Jsrp1</i>   | + | - |
| <i>Kank1</i>   | + | - |
| <i>Kank4</i>   | + | - |
| <i>Kazn</i>    | + | - |
| <i>Kbtbd11</i> | + | - |
| <i>Kbtbd13</i> | + | - |
| <i>Kcna1</i>   | + | - |
| <i>Kcna2</i>   | + | - |
| <i>Kcna6</i>   | + | - |
| <i>Kcna7</i>   | + | - |
| <i>Kcnab3</i>  | + | - |
| <i>Kcnb1</i>   | + | - |
| <i>Kcnc1</i>   | + | - |
| <i>Kcnc3</i>   | + | - |
| <i>Kcnc4</i>   | + | - |
| <i>Kcnd2</i>   | + | - |
| <i>Kcnd3</i>   | + | - |
| <i>Kcne3</i>   | + | - |
| <i>Kcnf1</i>   | + | - |
| <i>Kcng1</i>   | + | - |
| <i>Kcng2</i>   | + | - |
| <i>Kcng3</i>   | + | - |
| <i>Kcng4</i>   | + | - |
| <i>Kcnh1</i>   | + | - |
| <i>Kcnh2</i>   | + | - |
| <i>Kcnh3</i>   | + | - |
| <i>Kcnh4</i>   | + | - |
| <i>Kcnh8</i>   | + | - |
| <i>Kcnip2</i>  | + | - |
| <i>Kcnip3</i>  | + | - |
| <i>Kcnj1</i>   | + | - |
| <i>Kcnj10</i>  | + | - |
| <i>Kcnj11</i>  | + | - |
| <i>Kcnj12</i>  | + | - |
| <i>Kcnj2</i>   | + | - |
| <i>Kcnj4</i>   | + | - |
| <i>Kcnj5</i>   | + | - |
| <i>Kcnj6</i>   | + | - |
| <i>Kcnj8</i>   | + | - |
| <i>Kcnj9</i>   | + | - |
| <i>Kcnk1</i>   | + | - |
| <i>Kcnk10</i>  | + | - |
| <i>Kcnk12</i>  | + | - |

|                |   |   |
|----------------|---|---|
| <i>Kcnk15</i>  | + | - |
| <i>Kcnk3</i>   | + | - |
| <i>Kcnk4</i>   | + | - |
| <i>Kcnk9</i>   | + | - |
| <i>Kcnma1</i>  | + | - |
| <i>Kcnn1</i>   | + | - |
| <i>Kcnn3</i>   | + | - |
| <i>Kcnq1</i>   | + | - |
| <i>Kcnq2</i>   | + | - |
| <i>Kcnq3</i>   | + | - |
| <i>Kcnq4</i>   | + | - |
| <i>Kcns2</i>   | + | - |
| <i>Kcns3</i>   | + | - |
| <i>Kcnt1</i>   | + | - |
| <i>Kcp</i>     | + | - |
| <i>Kctd15</i>  | + | - |
| <i>Kctd16</i>  | + | - |
| <i>Kctd17</i>  | + | - |
| <i>Kctd19</i>  | + | - |
| <i>Kctd6</i>   | + | - |
| <i>Kdelc2</i>  | + | - |
| <i>Kdelr3</i>  | + | - |
| <i>Kdm6b</i>   | + | - |
| <i>Kdr</i>     | + | - |
| <i>Keg1</i>    | + | - |
| <i>Khdc3</i>   | + | - |
| <i>Khdrbs3</i> | + | - |
| <i>Kif13a</i>  | + | - |
| <i>Kif19a</i>  | + | - |
| <i>Kif1a</i>   | + | - |
| <i>Kif26a</i>  | + | - |
| <i>Kif26b</i>  | + | - |
| <i>Kif27</i>   | + | - |
| <i>Kif5a</i>   | + | - |
| <i>Kif7</i>    | + | - |
| <i>Kifc3</i>   | + | - |
| <i>Kirrel</i>  | + | - |
| <i>Kirrel2</i> | + | - |
| <i>Kirrel3</i> | + | - |
| <i>Kiss1</i>   | + | - |
| <i>Kitl</i>    | + | - |
| <i>Klb</i>     | + | - |
| <i>Klc3</i>    | + | - |
| <i>Klf14</i>   | + | - |
| <i>Klf15</i>   | + | - |
| <i>Klf4</i>    | + | - |
| <i>Klf5</i>    | + | - |
| <i>Klhdc7b</i> | + | - |
| <i>Klhdc8a</i> | + | - |
| <i>Klh122</i>  | + | - |
| <i>Klh123</i>  | + | - |
| <i>Klh129</i>  | + | - |
| <i>Klh130</i>  | + | - |

|                 |   |   |
|-----------------|---|---|
| <i>Klhl31</i>   | + | - |
| <i>Klhl32</i>   | + | - |
| <i>Klhl35</i>   | + | - |
| <i>Klhl40</i>   | + | - |
| <i>Klk8</i>     | + | - |
| <i>Klk9</i>     | + | - |
| <i>Klrg2</i>    | + | - |
| <i>Kncn</i>     | + | - |
| <i>Kremen2</i>  | + | - |
| <i>Krt1</i>     | + | - |
| <i>Krt18</i>    | + | - |
| <i>Krt19</i>    | + | - |
| <i>Krt24</i>    | + | - |
| <i>Krt25</i>    | + | - |
| <i>Krt4</i>     | + | - |
| <i>Krt8</i>     | + | - |
| <i>Krt83</i>    | + | - |
| <i>Krtap5-1</i> | + | - |
| <i>Krtap5-4</i> | + | - |
| <i>Ksr2</i>     | + | - |
| <i>L1td1</i>    | + | - |
| <i>L3mbtl1</i>  | + | - |
| <i>Lad1</i>     | + | - |
| <i>Lag3</i>     | + | - |
| <i>Lama3</i>    | + | - |
| <i>Lama4</i>    | + | - |
| <i>Lama5</i>    | + | - |
| <i>Lamb2</i>    | + | - |
| <i>Lamc2</i>    | + | - |
| <i>Lamc3</i>    | + | - |
| <i>Lamp3</i>    | + | - |
| <i>Lancl3</i>   | + | - |
| <i>Large</i>    | + | - |
| <i>Larp6</i>    | + | - |
| <i>Layn</i>     | + | - |
| <i>Lbx1</i>     | + | - |
| <i>Lbx2</i>     | + | - |
| <i>Lcn2</i>     | + | - |
| <i>Ldhb</i>     | + | - |
| <i>Ldlrad2</i>  | + | - |
| <i>Ldlrad3</i>  | + | - |
| <i>Lect1</i>    | + | - |
| <i>Lef1</i>     | + | - |
| <i>Lefty2</i>   | + | - |
| <i>Lemd1</i>    | + | - |
| <i>Lepr</i>     | + | - |
| <i>Leprel1</i>  | + | - |
| <i>Leprel2</i>  | + | - |
| <i>Leprel4</i>  | + | - |
| <i>Lgals12</i>  | + | - |
| <i>Lgals2</i>   | + | - |
| <i>Lgals3</i>   | + | - |
| <i>Lgi1</i>     | + | - |

|                  |   |   |
|------------------|---|---|
| <i>Lgi2</i>      | + | - |
| <i>Lgi3</i>      | + | - |
| <i>Lgi4</i>      | + | - |
| <i>Lgr4</i>      | + | - |
| <i>Lgr5</i>      | + | - |
| <i>Lgr6</i>      | + | - |
| <i>Lhb</i>       | + | - |
| <i>Lhfp</i>      | + | - |
| <i>Lhfpl2</i>    | + | - |
| <i>Lhfpl3</i>    | + | - |
| <i>Lhfpl5</i>    | + | - |
| <i>Lhx2</i>      | + | - |
| <i>Lhx3</i>      | + | - |
| <i>Lhx4</i>      | + | - |
| <i>Lhx5</i>      | + | - |
| <i>Lhx6</i>      | + | - |
| <i>Lhx8</i>      | + | - |
| <i>Lif</i>       | + | - |
| <i>Lifr</i>      | + | - |
| <i>Lima1</i>     | + | - |
| <i>Limch1</i>    | + | - |
| <i>Lims2</i>     | + | - |
| <i>Lin28a</i>    | + | - |
| <i>Lin28b</i>    | + | - |
| <i>Lin7b</i>     | + | - |
| <i>Lingo3</i>    | + | - |
| <i>Lingo4</i>    | + | - |
| <i>Lipg</i>      | + | - |
| <i>Liph</i>      | + | - |
| <i>Lmna</i>      | + | - |
| <i>Lmo1</i>      | + | - |
| <i>Lmod1</i>     | + | - |
| <i>Lmx1a</i>     | + | - |
| <i>Lmx1b</i>     | + | - |
| <i>LOC666331</i> | + | - |
| <i>Lonrf2</i>    | + | - |
| <i>Lonrf3</i>    | + | - |
| <i>Lor</i>       | + | - |
| <i>Lox</i>       | + | - |
| <i>Loxl1</i>     | + | - |
| <i>Loxl2</i>     | + | - |
| <i>Loxl4</i>     | + | - |
| <i>Lpar1</i>     | + | - |
| <i>Lpar3</i>     | + | - |
| <i>Lpcat2</i>    | + | - |
| <i>Lpcat2b</i>   | + | - |
| <i>Lphn1</i>     | + | - |
| <i>Lpin3</i>     | + | - |
| <i>Lpl</i>       | + | - |
| <i>Lpo</i>       | + | - |
| <i>Lrcol1</i>    | + | - |
| <i>Lrfn1</i>     | + | - |
| <i>Lrfn3</i>     | + | - |

|                |   |   |
|----------------|---|---|
| <i>Lrg1</i>    | + | - |
| <i>Lrig1</i>   | + | - |
| <i>Lrig3</i>   | + | - |
| <i>Lrp12</i>   | + | - |
| <i>Lrp2</i>    | + | - |
| <i>Lrp3</i>    | + | - |
| <i>Lrp4</i>    | + | - |
| <i>Lrp5</i>    | + | - |
| <i>Lrrc10</i>  | + | - |
| <i>Lrrc10b</i> | + | - |
| <i>Lrrc15</i>  | + | - |
| <i>Lrrc16a</i> | + | - |
| <i>Lrrc2</i>   | + | - |
| <i>Lrrc23</i>  | + | - |
| <i>Lrrc26</i>  | + | - |
| <i>Lrrc32</i>  | + | - |
| <i>Lrrc34</i>  | + | - |
| <i>Lrrc36</i>  | + | - |
| <i>Lrrc4</i>   | + | - |
| <i>Lrrc43</i>  | + | - |
| <i>Lrrc4b</i>  | + | - |
| <i>Lrrc6</i>   | + | - |
| <i>Lrrc73</i>  | + | - |
| <i>Lrrc8e</i>  | + | - |
| <i>Lrrc9</i>   | + | - |
| <i>Lrriq4</i>  | + | - |
| <i>Lrrn2</i>   | + | - |
| <i>Lrrn3</i>   | + | - |
| <i>Lrrn4</i>   | + | - |
| <i>Lrrn4cl</i> | + | - |
| <i>Lrtm2</i>   | + | - |
| <i>Ltb4r1</i>  | + | - |
| <i>Ltb4r2</i>  | + | - |
| <i>Ltbp1</i>   | + | - |
| <i>Ltbp2</i>   | + | - |
| <i>Ltbp3</i>   | + | - |
| <i>Ltbp4</i>   | + | - |
| <i>Ltbr</i>    | + | - |
| <i>Ly6g6c</i>  | + | - |
| <i>Ly6g6d</i>  | + | - |
| <i>Ly6g6e</i>  | + | - |
| <i>Ly6g6f</i>  | + | - |
| <i>Ly6h</i>    | + | - |
| <i>Lyg1</i>    | + | - |
| <i>Lyg2</i>    | + | - |
| <i>Lypd5</i>   | + | - |
| <i>Lypd6b</i>  | + | - |
| <i>Lysmd2</i>  | + | - |
| <i>Lyz1</i>    | + | - |
| <i>Lyz2</i>    | + | - |
| <i>Lyzl4</i>   | + | - |
| <i>Lyzl6</i>   | + | - |
| <i>M1ap</i>    | + | - |

|                 |   |   |
|-----------------|---|---|
| <i>Maats1</i>   | + | - |
| <i>Mab2111</i>  | + | - |
| <i>Macf1</i>    | + | - |
| <i>Macrocl2</i> | + | - |
| <i>Mafa</i>     | + | - |
| <i>Mafb</i>     | + | - |
| <i>Mageh1</i>   | + | - |
| <i>Magi1</i>    | + | - |
| <i>Magi2</i>    | + | - |
| <i>Magix</i>    | + | - |
| <i>Mak</i>      | + | - |
| <i>Mal</i>      | + | - |
| <i>Mall</i>     | + | - |
| <i>Mamdc4</i>   | + | - |
| <i>Mamld1</i>   | + | - |
| <i>Maneal</i>   | + | - |
| <i>Mansc1</i>   | + | - |
| <i>Mansc4</i>   | + | - |
| <i>Map1b</i>    | + | - |
| <i>Map2</i>     | + | - |
| <i>Map4k3</i>   | + | - |
| <i>Map6</i>     | + | - |
| <i>Map6d1</i>   | + | - |
| <i>Map7d2</i>   | + | - |
| <i>Mapk12</i>   | + | - |
| <i>Mapk13</i>   | + | - |
| <i>Mapk15</i>   | + | - |
| <i>Mapk4</i>    | + | - |
| <i>Mapk8ip1</i> | + | - |
| <i>Mapk8ip2</i> | + | - |
| <i>Mapt</i>     | + | - |
| <i>March10</i>  | + | - |
| <i>March11</i>  | + | - |
| <i>March4</i>   | + | - |
| <i>March8</i>   | + | - |
| <i>March9</i>   | + | - |
| <i>Mark1</i>    | + | - |
| <i>Marveld1</i> | + | - |
| <i>Marveld3</i> | + | - |
| <i>Mas1</i>     | + | - |
| <i>Masp1</i>    | + | - |
| <i>Mast1</i>    | + | - |
| <i>Mast4</i>    | + | - |
| <i>Matn2</i>    | + | - |
| <i>Matn3</i>    | + | - |
| <i>Matn4</i>    | + | - |
| <i>Mb21d1</i>   | + | - |
| <i>Mb21d2</i>   | + | - |
| <i>Mboat1</i>   | + | - |
| <i>Mboat2</i>   | + | - |
| <i>Mboat4</i>   | + | - |
| <i>Mc1r</i>     | + | - |
| <i>Mc5r</i>     | + | - |



|                 |   |   |
|-----------------|---|---|
| <i>Mcam</i>     | + | - |
| <i>Mcc</i>      | + | - |
| <i>Mcf2l</i>    | + | - |
| <i>Mchr1</i>    | + | - |
| <i>Mcin</i>     | + | - |
| <i>Mcmdc2</i>   | + | - |
| <i>Mcoln3</i>   | + | - |
| <i>Mctp1</i>    | + | - |
| <i>Mdfi</i>     | + | - |
| <i>Mdga1</i>    | + | - |
| <i>Mdk</i>      | + | - |
| <i>Me1</i>      | + | - |
| <i>Me3</i>      | + | - |
| <i>Mecom</i>    | + | - |
| <i>Med12l</i>   | + | - |
| <i>Mef2c</i>    | + | - |
| <i>Megf10</i>   | + | - |
| <i>Megf11</i>   | + | - |
| <i>Megf6</i>    | + | - |
| <i>Megf8</i>    | + | - |
| <i>Mei1</i>     | + | - |
| <i>Mei4</i>     | + | - |
| <i>Meis1</i>    | + | - |
| <i>Meis2</i>    | + | - |
| <i>Meox1</i>    | + | - |
| <i>Meox2</i>    | + | - |
| <i>Mertk</i>    | + | - |
| <i>Mesp1</i>    | + | - |
| <i>Mesp2</i>    | + | - |
| <i>Mest</i>     | + | - |
| <i>Met</i>      | + | - |
| <i>Mettl21c</i> | + | - |
| <i>Mettl24</i>  | + | - |
| <i>Mfap2</i>    | + | - |
| <i>Mfap3l</i>   | + | - |
| <i>Mfap5</i>    | + | - |
| <i>Mfhas1</i>   | + | - |
| <i>Mfsd2b</i>   | + | - |
| <i>Mfsd4</i>    | + | - |
| <i>Mfsd7a</i>   | + | - |
| <i>Mfsd7c</i>   | + | - |
| <i>Mgat3</i>    | + | - |
| <i>Mgat5b</i>   | + | - |
| <i>Mgl2</i>     | + | - |
| <i>Mgp</i>      | + | - |
| <i>Mia2</i>     | + | - |
| <i>Miat</i>     | + | - |
| <i>Mical2</i>   | + | - |
| <i>Mical3</i>   | + | - |
| <i>Micall2</i>  | + | - |
| <i>Miox</i>     | + | - |
| <i>Mir101a</i>  | + | - |
| <i>Mir10b</i>   | + | - |

|                  |   |   |
|------------------|---|---|
| <i>Mir1199</i>   | + | - |
| <i>Mir1247</i>   | + | - |
| <i>Mir124a-1</i> | + | - |
| <i>Mir124a-2</i> | + | - |
| <i>Mir124a-3</i> | + | - |
| <i>Mir125a</i>   | + | - |
| <i>Mir125b-1</i> | + | - |
| <i>Mir129-1</i>  | + | - |
| <i>Mir129-2</i>  | + | - |
| <i>Mir130a</i>   | + | - |
| <i>Mir132</i>    | + | - |
| <i>Mir135a-1</i> | + | - |
| <i>Mir135b</i>   | + | - |
| <i>Mir146b</i>   | + | - |
| <i>Mir147</i>    | + | - |
| <i>Mir149</i>    | + | - |
| <i>Mir152</i>    | + | - |
| <i>Mir17hg</i>   | + | - |
| <i>Mir181c</i>   | + | - |
| <i>Mir181d</i>   | + | - |
| <i>Mir182</i>    | + | - |
| <i>Mir183</i>    | + | - |
| <i>Mir1895</i>   | + | - |
| <i>Mir1896</i>   | + | - |
| <i>Mir1897</i>   | + | - |
| <i>Mir1901</i>   | + | - |
| <i>Mir1903</i>   | + | - |
| <i>Mir1905</i>   | + | - |
| <i>Mir190b</i>   | + | - |
| <i>Mir192</i>    | + | - |
| <i>Mir193b</i>   | + | - |
| <i>Mir194-2</i>  | + | - |
| <i>Mir195</i>    | + | - |
| <i>Mir1966</i>   | + | - |
| <i>Mir196a-1</i> | + | - |
| <i>Mir196a-2</i> | + | - |
| <i>Mir196b</i>   | + | - |
| <i>Mir1983</i>   | + | - |
| <i>Mir199a-2</i> | + | - |
| <i>Mir199b</i>   | + | - |
| <i>Mir19b-2</i>  | + | - |
| <i>Mir1a-1</i>   | + | - |
| <i>Mir202</i>    | + | - |
| <i>Mir210</i>    | + | - |
| <i>Mir212</i>    | + | - |
| <i>Mir2137</i>   | + | - |
| <i>Mir214</i>    | + | - |
| <i>Mir290</i>    | + | - |
| <i>Mir291a</i>   | + | - |
| <i>Mir291b</i>   | + | - |
| <i>Mir292</i>    | + | - |
| <i>Mir293</i>    | + | - |
| <i>Mir294</i>    | + | - |

|                 |   |   |
|-----------------|---|---|
| <i>Mir295</i>   | + | - |
| <i>Mir3078</i>  | + | - |
| <i>Mir3081</i>  | + | - |
| <i>Mir3083</i>  | + | - |
| <i>Mir3089</i>  | + | - |
| <i>Mir3093</i>  | + | - |
| <i>Mir3100</i>  | + | - |
| <i>Mir322</i>   | + | - |
| <i>Mir324</i>   | + | - |
| <i>Mir335</i>   | + | - |
| <i>Mir34b</i>   | + | - |
| <i>Mir34c</i>   | + | - |
| <i>Mir351</i>   | + | - |
| <i>Mir365-1</i> | + | - |
| <i>Mir375</i>   | + | - |
| <i>Mir449a</i>  | + | - |
| <i>Mir449b</i>  | + | - |
| <i>Mir450-1</i> | + | - |
| <i>Mir450-2</i> | + | - |
| <i>Mir450b</i>  | + | - |
| <i>Mir483</i>   | + | - |
| <i>Mir497</i>   | + | - |
| <i>Mir499</i>   | + | - |
| <i>Mir503</i>   | + | - |
| <i>Mir5126</i>  | + | - |
| <i>Mir542</i>   | + | - |
| <i>Mir615</i>   | + | - |
| <i>Mir670</i>   | + | - |
| <i>Mir675</i>   | + | - |
| <i>Mir684-1</i> | + | - |
| <i>Mir7-2</i>   | + | - |
| <i>Mir705</i>   | + | - |
| <i>Mir7b</i>    | + | - |
| <i>Mir9-1</i>   | + | - |
| <i>Mir9-3</i>   | + | - |
| <i>Mir92-1</i>  | + | - |
| <i>Mir92-2</i>  | + | - |
| <i>Mir96</i>    | + | - |
| <i>Mir99b</i>   | + | - |
| <i>Mira</i>     | + | - |
| <i>Mirlet7e</i> | + | - |
| <i>Mitf</i>     | + | - |
| <i>Mixl1</i>    | + | - |
| <i>Mkx</i>      | + | - |
| <i>Mlana</i>    | + | - |
| <i>Mlf1</i>     | + | - |
| <i>Mllt4</i>    | + | - |
| <i>Mlxipl</i>   | + | - |
| <i>Mmd2</i>     | + | - |
| <i>Mmp11</i>    | + | - |
| <i>Mmp14</i>    | + | - |
| <i>Mmp15</i>    | + | - |
| <i>Mmp19</i>    | + | - |

|                |   |   |
|----------------|---|---|
| <i>Mmp24</i>   | + | - |
| <i>Mmp25</i>   | + | - |
| <i>Mmp28</i>   | + | - |
| <i>Mmp7</i>    | + | - |
| <i>Mmp9</i>    | + | - |
| <i>Mn1</i>     | + | - |
| <i>Mnx1</i>    | + | - |
| <i>Mog</i>     | + | - |
| <i>Mogat1</i>  | + | - |
| <i>Mogat2</i>  | + | - |
| <i>Morc4</i>   | + | - |
| <i>Morn4</i>   | + | - |
| <i>Mos</i>     | + | - |
| <i>Mospd4</i>  | + | - |
| <i>Moxd1</i>   | + | - |
| <i>Mpo</i>     | + | - |
| <i>Mpp2</i>    | + | - |
| <i>Mpp3</i>    | + | - |
| <i>Mpped1</i>  | + | - |
| <i>Mpped2</i>  | + | - |
| <i>Mpv17l</i>  | + | - |
| <i>Mpzi2</i>   | + | - |
| <i>Mrap2</i>   | + | - |
| <i>Mras</i>    | + | - |
| <i>Mrc2</i>    | + | - |
| <i>Mrgprg</i>  | + | - |
| <i>Mrgprh</i>  | + | - |
| <i>Mro</i>     | + | - |
| <i>Mroh2a</i>  | + | - |
| <i>Mroh5</i>   | + | - |
| <i>Ms4a13</i>  | + | - |
| <i>Ms4a2</i>   | + | - |
| <i>Ms4a3</i>   | + | - |
| <i>Ms4a6d</i>  | + | - |
| <i>Msantd3</i> | + | - |
| <i>Msc</i>     | + | - |
| <i>Msi1</i>    | + | - |
| <i>Msmg</i>    | + | - |
| <i>Msrb3</i>   | + | - |
| <i>Msx1</i>    | + | - |
| <i>Msx1as</i>  | + | - |
| <i>Msx2</i>    | + | - |
| <i>Mt1</i>     | + | - |
| <i>Mt2</i>     | + | - |
| <i>Mt3</i>     | + | - |
| <i>Mtap7d3</i> | + | - |
| <i>Mthfd2l</i> | + | - |
| <i>Mtmr11</i>  | + | - |
| <i>Mtss1l</i>  | + | - |
| <i>Mtus1</i>   | + | - |
| <i>Mtus2</i>   | + | - |
| <i>Mvb12b</i>  | + | - |
| <i>Mxra7</i>   | + | - |

|                   |   |   |
|-------------------|---|---|
| <i>Mybpc1</i>     | + | - |
| <i>Mybph</i>      | + | - |
| <i>Mycn</i>       | + | - |
| <i>Myct1</i>      | + | - |
| <i>Myh10</i>      | + | - |
| <i>Myh11</i>      | + | - |
| <i>Myh14</i>      | + | - |
| <i>Myh7b</i>      | + | - |
| <i>Myl10</i>      | + | - |
| <i>Myl2</i>       | + | - |
| <i>Myl7</i>       | + | - |
| <i>Myl9</i>       | + | - |
| <i>Mylk2</i>      | + | - |
| <i>Mylk4</i>      | + | - |
| <i>Myo18a</i>     | + | - |
| <i>Myo1b</i>      | + | - |
| <i>Myo5b</i>      | + | - |
| <i>Myo5c</i>      | + | - |
| <i>Myo7a</i>      | + | - |
| <i>Myod1</i>      | + | - |
| <i>Myom1</i>      | + | - |
| <i>Myom3</i>      | + | - |
| <i>Myoz1</i>      | + | - |
| <i>Mypn</i>       | + | - |
| <i>Myrf</i>       | + | - |
| <i>Myrip</i>      | + | - |
| <i>Myt1</i>       | + | - |
| <i>N28178</i>     | + | - |
| <i>Nacad</i>      | + | - |
| <i>Nacc2</i>      | + | - |
| <i>Nags</i>       | + | - |
| <i>Nanog</i>      | + | - |
| <i>Nanos2</i>     | + | - |
| <i>Nap1l2</i>     | + | - |
| <i>Napb</i>       | + | - |
| <i>Nat14</i>      | + | - |
| <i>Nat8l</i>      | + | - |
| <i>Nav1</i>       | + | - |
| <i>Nbea</i>       | + | - |
| <i>Nbl1</i>       | + | - |
| <i>Ncald</i>      | + | - |
| <i>Ncan</i>       | + | - |
| <i>Nccrp1</i>     | + | - |
| <i>Nckap1</i>     | + | - |
| <i>Nckap5</i>     | + | - |
| <i>Ncmap</i>      | + | - |
| <i>Ncrna00085</i> | + | - |
| <i>Ncs1</i>       | + | - |
| <i>Ndrg2</i>      | + | - |
| <i>Ndrg4</i>      | + | - |
| <i>Ndufa4l2</i>   | + | - |
| <i>Nebi</i>       | + | - |
| <i>Necab1</i>     | + | - |

|                 |   |   |
|-----------------|---|---|
| <i>Necab2</i>   | + | - |
| <i>Nefh</i>     | + | - |
| <i>Nefl</i>     | + | - |
| <i>Nefm</i>     | + | - |
| <i>Nell1</i>    | + | - |
| <i>Nenf</i>     | + | - |
| <i>Neo1</i>     | + | - |
| <i>Nepn</i>     | + | - |
| <i>Nes</i>      | + | - |
| <i>Neu2</i>     | + | - |
| <i>Neurod1</i>  | + | - |
| <i>Neurod2</i>  | + | - |
| <i>Neurog1</i>  | + | - |
| <i>Neurog2</i>  | + | - |
| <i>Neurog3</i>  | + | - |
| <i>Nexn</i>     | + | - |
| <i>Nfasc</i>    | + | - |
| <i>Nfatc4</i>   | + | - |
| <i>Nfe2</i>     | + | - |
| <i>Nfe2l3</i>   | + | - |
| <i>Nfia</i>     | + | - |
| <i>Nfib</i>     | + | - |
| <i>Nfic</i>     | + | - |
| <i>Nfix</i>     | + | - |
| <i>Ngb</i>      | + | - |
| <i>Ngef</i>     | + | - |
| <i>Ngfr</i>     | + | - |
| <i>Ngfrap1</i>  | + | - |
| <i>Nhlh1</i>    | + | - |
| <i>Nhlh2</i>    | + | - |
| <i>Nhlrc1</i>   | + | - |
| <i>Nhlrc4</i>   | + | - |
| <i>Nhs11</i>    | + | - |
| <i>Nhs12</i>    | + | - |
| <i>Niacr1</i>   | + | - |
| <i>Nid2</i>     | + | - |
| <i>Ninl</i>     | + | - |
| <i>Nipa1</i>    | + | - |
| <i>Nipal2</i>   | + | - |
| <i>Nipal4</i>   | + | - |
| <i>Nkain1</i>   | + | - |
| <i>Nkain3</i>   | + | - |
| <i>Nkain4</i>   | + | - |
| <i>Nkd1</i>     | + | - |
| <i>Nkd2</i>     | + | - |
| <i>Nkg7</i>     | + | - |
| <i>Nkpd1</i>    | + | - |
| <i>Nkx1-2</i>   | + | - |
| <i>Nkx2-1</i>   | + | - |
| <i>Nkx2-2</i>   | + | - |
| <i>Nkx2-2as</i> | + | - |
| <i>Nkx2-3</i>   | + | - |
| <i>Nkx2-4</i>   | + | - |

|                 |   |   |
|-----------------|---|---|
| <i>Nkx2-5</i>   | + | - |
| <i>Nkx2-6</i>   | + | - |
| <i>Nkx2-9</i>   | + | - |
| <i>Nkx3-1</i>   | + | - |
| <i>Nkx3-2</i>   | + | - |
| <i>Nkx6-1</i>   | + | - |
| <i>Nkx6-2</i>   | + | - |
| <i>Nkx6-3</i>   | + | - |
| <i>Nlgn2</i>    | + | - |
| <i>Nlrp6</i>    | + | - |
| <i>Nme5</i>     | + | - |
| <i>Nme9</i>     | + | - |
| <i>Nmnat2</i>   | + | - |
| <i>Nmu</i>      | + | - |
| <i>Nnat</i>     | + | - |
| <i>Nodal</i>    | + | - |
| <i>Nog</i>      | + | - |
| <i>Nol3</i>     | + | - |
| <i>Nol4</i>     | + | - |
| <i>Nos1ap</i>   | + | - |
| <i>Nos2</i>     | + | - |
| <i>Notch3</i>   | + | - |
| <i>Notch4</i>   | + | - |
| <i>Noto</i>     | + | - |
| <i>Notum</i>    | + | - |
| <i>Nova2</i>    | + | - |
| <i>Npas1</i>    | + | - |
| <i>Npas2</i>    | + | - |
| <i>Npas3</i>    | + | - |
| <i>Npas4</i>    | + | - |
| <i>Npffr1</i>   | + | - |
| <i>Nphs1</i>    | + | - |
| <i>Nphs1as</i>  | + | - |
| <i>Nphs2</i>    | + | - |
| <i>Npl</i>      | + | - |
| <i>Npm2</i>     | + | - |
| <i>Npm3-ps1</i> | + | - |
| <i>Npnt</i>     | + | - |
| <i>Nppc</i>     | + | - |
| <i>Npr1</i>     | + | - |
| <i>Npr2</i>     | + | - |
| <i>Npr3</i>     | + | - |
| <i>Nptx1</i>    | + | - |
| <i>Nptx2</i>    | + | - |
| <i>Nptxr</i>    | + | - |
| <i>Npw</i>      | + | - |
| <i>Npy</i>      | + | - |
| <i>Npy1r</i>    | + | - |
| <i>Nr0b2</i>    | + | - |
| <i>Nr1d1</i>    | + | - |
| <i>Nr1h3</i>    | + | - |
| <i>Nr1h5</i>    | + | - |
| <i>Nr1i3</i>    | + | - |

|                |   |   |
|----------------|---|---|
| <i>Nr2e1</i>   | + | - |
| <i>Nr2f1</i>   | + | - |
| <i>Nr2f2</i>   | + | - |
| <i>Nr3c2</i>   | + | - |
| <i>Nr4a1</i>   | + | - |
| <i>Nr4a2</i>   | + | - |
| <i>Nr4a3</i>   | + | - |
| <i>Nr5a1</i>   | + | - |
| <i>Nr5a2</i>   | + | - |
| <i>Nrap</i>    | + | - |
| <i>Nrap</i>    | + | - |
| <i>Nrbp2</i>   | + | - |
| <i>Nrcam</i>   | + | - |
| <i>Nrep</i>    | + | - |
| <i>Nrg2</i>    | + | - |
| <i>Nrg3</i>    | + | - |
| <i>Nrg4</i>    | + | - |
| <i>Nrgn</i>    | + | - |
| <i>Nrip3</i>   | + | - |
| <i>Nrl</i>     | + | - |
| <i>Nrn1</i>    | + | - |
| <i>Nrp1</i>    | + | - |
| <i>Nrp2</i>    | + | - |
| <i>Nrsn2</i>   | + | - |
| <i>Nrtn</i>    | + | - |
| <i>Nsg1</i>    | + | - |
| <i>Nsun7</i>   | + | - |
| <i>Nt5c1a</i>  | + | - |
| <i>Nt5dc2</i>  | + | - |
| <i>Ntf3</i>    | + | - |
| <i>Ntf5</i>    | + | - |
| <i>Ntn1</i>    | + | - |
| <i>Ntn3</i>    | + | - |
| <i>Ntn4</i>    | + | - |
| <i>Ntng1</i>   | + | - |
| <i>Ntng2</i>   | + | - |
| <i>Ntrk1</i>   | + | - |
| <i>Ntrk3</i>   | + | - |
| <i>Ntsr1</i>   | + | - |
| <i>Nuak1</i>   | + | - |
| <i>Nudt17</i>  | + | - |
| <i>Nup62cl</i> | + | - |
| <i>Nxf2</i>    | + | - |
| <i>Nxn1</i>    | + | - |
| <i>Nxph1</i>   | + | - |
| <i>Nxph2</i>   | + | - |
| <i>Nxph3</i>   | + | - |
| <i>Nxph4</i>   | + | - |
| <i>Nynrin</i>  | + | - |
| <i>Oacyl</i>   | + | - |
| <i>Oaz3</i>    | + | - |
| <i>Obscn</i>   | + | - |
| <i>Obsl1</i>   | + | - |



|          |   |   |
|----------|---|---|
| Ociad2   | + | - |
| Ocln     | + | - |
| Odf1     | + | - |
| Odf3     | + | - |
| Odf4     | + | - |
| Olah     | + | - |
| Olfm1    | + | - |
| Olfm2    | + | - |
| Olfr1110 | + | - |
| Olfr12   | + | - |
| Olfr1359 | + | - |
| Olfr1364 | + | - |
| Olfr1366 | + | - |
| Olfr1367 | + | - |
| Olfr1368 | + | - |
| Olfr1394 | + | - |
| Olfr1395 | + | - |
| Olfr1396 | + | - |
| Olfr1416 | + | - |
| Olfr1417 | + | - |
| Olfr1419 | + | - |
| Olfr1420 | + | - |
| Olfr1440 | + | - |
| Olfr1441 | + | - |
| Olfr1442 | + | - |
| Olfr1443 | + | - |
| Olfr1444 | + | - |
| Olfr15   | + | - |
| Olfr1535 | + | - |
| Olfr167  | + | - |
| Olfr168  | + | - |
| Olfr169  | + | - |
| Olfr171  | + | - |
| Olfr221  | + | - |
| Olfr222  | + | - |
| Olfr223  | + | - |
| Olfr225  | + | - |
| Olfr288  | + | - |
| Olfr311  | + | - |
| Olfr370  | + | - |
| Olfr49   | + | - |
| Olfr547  | + | - |
| Olfr549  | + | - |
| Olfr550  | + | - |
| Olfr551  | + | - |
| Olfr629  | + | - |
| Olfr63   | + | - |
| Olfr630  | + | - |
| Olfr64   | + | - |
| Olfr649  | + | - |
| Olfr66   | + | - |
| Olfr67   | + | - |
| Olfr68   | + | - |

|                |   |   |
|----------------|---|---|
| <i>Olf69</i>   | + | - |
| <i>Olf750</i>  | + | - |
| <i>Olf90</i>   | + | - |
| <i>Olf94</i>   | + | - |
| <i>Olf95</i>   | + | - |
| <i>Olig1</i>   | + | - |
| <i>Olig2</i>   | + | - |
| <i>Olig3</i>   | + | - |
| <i>Onecut1</i> | + | - |
| <i>Onecut2</i> | + | - |
| <i>Onecut3</i> | + | - |
| <i>Ooep</i>    | + | - |
| <i>Ophn1</i>   | + | - |
| <i>Oprd1</i>   | + | - |
| <i>Opr1</i>    | + | - |
| <i>Optc</i>    | + | - |
| <i>Orm1</i>    | + | - |
| <i>Osbp2</i>   | + | - |
| <i>Ospl5</i>   | + | - |
| <i>Osm</i>     | + | - |
| <i>Osmr</i>    | + | - |
| <i>Osr1</i>    | + | - |
| <i>Osr2</i>    | + | - |
| <i>Ostn</i>    | + | - |
| <i>Otof</i>    | + | - |
| <i>Otop1</i>   | + | - |
| <i>Otop3</i>   | + | - |
| <i>Otp</i>     | + | - |
| <i>Otx1</i>    | + | - |
| <i>Otx2</i>    | + | - |
| <i>Otx2os1</i> | + | - |
| <i>Ovol1</i>   | + | - |
| <i>Ovol2</i>   | + | - |
| <i>Oxct2a</i>  | + | - |
| <i>Oxct2b</i>  | + | - |
| <i>Oxt</i>     | + | - |
| <i>Oxtr</i>    | + | - |
| <i>P2rx2</i>   | + | - |
| <i>P2rx5</i>   | + | - |
| <i>P2rx6</i>   | + | - |
| <i>P2ry1</i>   | + | - |
| <i>P2ry2</i>   | + | - |
| <i>P4ha2</i>   | + | - |
| <i>P4ha3</i>   | + | - |
| <i>Pak1</i>    | + | - |
| <i>Pak6</i>    | + | - |
| <i>Pald1</i>   | + | - |
| <i>Palm3</i>   | + | - |
| <i>Pamr1</i>   | + | - |
| <i>Panx2</i>   | + | - |
| <i>Panx3</i>   | + | - |
| <i>Papolb</i>  | + | - |
| <i>Papss2</i>  | + | - |

|                 |   |   |
|-----------------|---|---|
| <i>Paqr5</i>    | + | - |
| <i>Paqr6</i>    | + | - |
| <i>Paqr9</i>    | + | - |
| <i>Pard3</i>    | + | - |
| <i>Parp12</i>   | + | - |
| <i>Parva</i>    | + | - |
| <i>Parvb</i>    | + | - |
| <i>Pate4</i>    | + | - |
| <i>Pax1</i>     | + | - |
| <i>Pax2</i>     | + | - |
| <i>Pax3</i>     | + | - |
| <i>Pax4</i>     | + | - |
| <i>Pax6</i>     | + | - |
| <i>Pax6os1</i>  | + | - |
| <i>Pax7</i>     | + | - |
| <i>Pax8</i>     | + | - |
| <i>Pax9</i>     | + | - |
| <i>Pcdh1</i>    | + | - |
| <i>Pcdh10</i>   | + | - |
| <i>Pcdh12</i>   | + | - |
| <i>Pcdh17</i>   | + | - |
| <i>Pcdh19</i>   | + | - |
| <i>Pcdh7</i>    | + | - |
| <i>Pcdh8</i>    | + | - |
| <i>Pcdhga10</i> | + | - |
| <i>Pcdhga11</i> | + | - |
| <i>Pcdhga12</i> | + | - |
| <i>Pcdhga7</i>  | + | - |
| <i>Pcdhgb6</i>  | + | - |
| <i>Pcdhgb7</i>  | + | - |
| <i>Pcdhgb8</i>  | + | - |
| <i>Pcdhgc5</i>  | + | - |
| <i>Pcgf2</i>    | + | - |
| <i>Pcnxl2</i>   | + | - |
| <i>Pcolce2</i>  | + | - |
| <i>Pcp4</i>     | + | - |
| <i>Pcp4l1</i>   | + | - |
| <i>Pcsk1n</i>   | + | - |
| <i>Pcsk2</i>    | + | - |
| <i>Pcsk4</i>    | + | - |
| <i>Pcsk5</i>    | + | - |
| <i>Pcsk6</i>    | + | - |
| <i>Pcsk9</i>    | + | - |
| <i>Pde10a</i>   | + | - |
| <i>Pde1b</i>    | + | - |
| <i>Pde4a</i>    | + | - |
| <i>Pde5a</i>    | + | - |
| <i>Pde6a</i>    | + | - |
| <i>Pde6b</i>    | + | - |
| <i>Pde6c</i>    | + | - |
| <i>Pde6h</i>    | + | - |
| <i>Pde7b</i>    | + | - |
| <i>Pde8a</i>    | + | - |

|                 |   |   |
|-----------------|---|---|
| <i>Pde8b</i>    | + | - |
| <i>Pde9a</i>    | + | - |
| <i>Pdgfa</i>    | + | - |
| <i>Pdgfb</i>    | + | - |
| <i>Pdgfc</i>    | + | - |
| <i>Pdgfra</i>   | + | - |
| <i>Pdgfrb</i>   | + | - |
| <i>Pdia2</i>    | + | - |
| <i>Pdia5</i>    | + | - |
| <i>Pdk2</i>     | + | - |
| <i>Pdlim4</i>   | + | - |
| <i>Pdx1</i>     | + | - |
| <i>Pdzd4</i>    | + | - |
| <i>Pdzrn4</i>   | + | - |
| <i>Pebp4</i>    | + | - |
| <i>Peg10</i>    | + | - |
| <i>Peg3</i>     | + | - |
| <i>Peli2</i>    | + | - |
| <i>Peli3</i>    | + | - |
| <i>Penk</i>     | + | - |
| <i>Perp</i>     | + | - |
| <i>Pfn3</i>     | + | - |
| <i>Pfpl</i>     | + | - |
| <i>Pga5</i>     | + | - |
| <i>Pgbd5</i>    | + | - |
| <i>Pgf</i>      | + | - |
| <i>Pgm5</i>     | + | - |
| <i>Pgpep1l</i>  | + | - |
| <i>Pgr</i>      | + | - |
| <i>Phlda2</i>   | + | - |
| <i>Phlda3</i>   | + | - |
| <i>Phldb1</i>   | + | - |
| <i>Phldb2</i>   | + | - |
| <i>Phospho1</i> | + | - |
| <i>Phox2a</i>   | + | - |
| <i>Phox2b</i>   | + | - |
| <i>Phyhip</i>   | + | - |
| <i>Phyhipl</i>  | + | - |
| <i>Pianp</i>    | + | - |
| <i>Pigz</i>     | + | - |
| <i>Pik3r6</i>   | + | - |
| <i>Pin1-ps1</i> | + | - |
| <i>Pipox</i>    | + | - |
| <i>Pitpnm3</i>  | + | - |
| <i>Pitx1</i>    | + | - |
| <i>Pitx2</i>    | + | - |
| <i>Pitx3</i>    | + | - |
| <i>Pkd2</i>     | + | - |
| <i>Pkdcc</i>    | + | - |
| <i>Pkdrej</i>   | + | - |
| <i>Pkia</i>     | + | - |
| <i>Pklr</i>     | + | - |
| <i>Pknox2</i>   | + | - |

|                 |   |   |
|-----------------|---|---|
| <i>Pkp1</i>     | + | - |
| <i>Pkp2</i>     | + | - |
| <i>Pkp3</i>     | + | - |
| <i>Pla2g10</i>  | + | - |
| <i>Pla2g2c</i>  | + | - |
| <i>Pla2g2e</i>  | + | - |
| <i>Pla2g4e</i>  | + | - |
| <i>Plac1l</i>   | + | - |
| <i>Plac8</i>    | + | - |
| <i>Plagl1</i>   | + | - |
| <i>Plat</i>     | + | - |
| <i>Plaur</i>    | + | - |
| <i>Plbd1</i>    | + | - |
| <i>Plcb2</i>    | + | - |
| <i>Plcd1</i>    | + | - |
| <i>Plcd4</i>    | + | - |
| <i>Plcl1</i>    | + | - |
| <i>Pld1</i>     | + | - |
| <i>Plek2</i>    | + | - |
| <i>Plekhb1</i>  | + | - |
| <i>Plekhd1</i>  | + | - |
| <i>Plekhg1</i>  | + | - |
| <i>Plekhg5</i>  | + | - |
| <i>Plekhg6</i>  | + | - |
| <i>Plekhh1</i>  | + | - |
| <i>Plekhh2</i>  | + | - |
| <i>Plin5</i>    | + | - |
| <i>Plk5</i>     | + | - |
| <i>Plip</i>     | + | - |
| <i>Plod1</i>    | + | - |
| <i>Plod2</i>    | + | - |
| <i>Pls1</i>     | + | - |
| <i>Plvap</i>    | + | - |
| <i>Plxdc2</i>   | + | - |
| <i>Plxna1</i>   | + | - |
| <i>Plxna2</i>   | + | - |
| <i>Plxna4</i>   | + | - |
| <i>Pm20d1</i>   | + | - |
| <i>Pm20d2</i>   | + | - |
| <i>Pml</i>      | + | - |
| <i>Pmp22</i>    | + | - |
| <i>Pnck</i>     | + | - |
| <i>Pnma2</i>    | + | - |
| <i>Pnma3</i>    | + | - |
| <i>Pnmal1</i>   | + | - |
| <i>Pnmal2</i>   | + | - |
| <i>Pnmt</i>     | + | - |
| <i>Pnoc</i>     | + | - |
| <i>Pnpla3</i>   | + | - |
| <i>Podn</i>     | + | - |
| <i>Podxl</i>    | + | - |
| <i>Podxl2</i>   | + | - |
| <i>Pom121l2</i> | + | - |

|                   |   |   |
|-------------------|---|---|
| <i>Pomc</i>       | + | - |
| <i>Popdc3</i>     | + | - |
| <i>Porcn</i>      | + | - |
| <i>Pou2f3</i>     | + | - |
| <i>Pou3f1</i>     | + | - |
| <i>Pou3f2</i>     | + | - |
| <i>Pou3f3</i>     | + | - |
| <i>Pou4f1</i>     | + | - |
| <i>Pou4f2</i>     | + | - |
| <i>Pou4f3</i>     | + | - |
| <i>Pou5f1</i>     | + | - |
| <i>Ppapdc3</i>    | + | - |
| <i>Pparg</i>      | + | - |
| <i>Ppic</i>       | + | - |
| <i>Ppip5k1</i>    | + | - |
| <i>Ppm1h</i>      | + | - |
| <i>Ppm1j</i>      | + | - |
| <i>Ppm1n</i>      | + | - |
| <i>Ppp1r14d</i>   | + | - |
| <i>Ppp1r1a</i>    | + | - |
| <i>Ppp1r1b</i>    | + | - |
| <i>Ppp1r2-ps3</i> | + | - |
| <i>Ppp1r26</i>    | + | - |
| <i>Ppp1r3b</i>    | + | - |
| <i>Ppp1r3c</i>    | + | - |
| <i>Ppp1r3g</i>    | + | - |
| <i>Ppp1r42</i>    | + | - |
| <i>Ppp1r9a</i>    | + | - |
| <i>Ppp2r2c</i>    | + | - |
| <i>Ppp2r3a</i>    | + | - |
| <i>Ppp4r4</i>     | + | - |
| <i>Ppy</i>        | + | - |
| <i>Pramel1</i>    | + | - |
| <i>Prdm12</i>     | + | - |
| <i>Prdm13</i>     | + | - |
| <i>Prdm14</i>     | + | - |
| <i>Prdm16</i>     | + | - |
| <i>Prdm5</i>      | + | - |
| <i>Prdm6</i>      | + | - |
| <i>Prdm8</i>      | + | - |
| <i>Prg3</i>       | + | - |
| <i>Prhoxnb</i>    | + | - |
| <i>Prickle1</i>   | + | - |
| <i>Prima1</i>     | + | - |
| <i>Prkaa2</i>     | + | - |
| <i>Prkag3</i>     | + | - |
| <i>Prkar1b</i>    | + | - |
| <i>Prkar2b</i>    | + | - |
| <i>Prkcdbp</i>    | + | - |
| <i>Prkch</i>      | + | - |
| <i>Prkcq</i>      | + | - |
| <i>Prkcz</i>      | + | - |
| <i>Prkg1</i>      | + | - |

|                 |   |   |
|-----------------|---|---|
| <i>Prlhr</i>    | + | - |
| <i>Prlr</i>     | + | - |
| <i>Prmt8</i>    | + | - |
| <i>Prnd</i>     | + | - |
| <i>Procr</i>    | + | - |
| <i>Prodh</i>    | + | - |
| <i>Prok2</i>    | + | - |
| <i>Prokr2</i>   | + | - |
| <i>Prom1</i>    | + | - |
| <i>Prom2</i>    | + | - |
| <i>Pros1</i>    | + | - |
| <i>Proser2</i>  | + | - |
| <i>Prox1</i>    | + | - |
| <i>Prph</i>     | + | - |
| <i>Prr15</i>    | + | - |
| <i>Prr18</i>    | + | - |
| <i>Prr19</i>    | + | - |
| <i>Prr7</i>     | + | - |
| <i>Prrt1</i>    | + | - |
| <i>Prrt3</i>    | + | - |
| <i>Prrt4</i>    | + | - |
| <i>Prrx1</i>    | + | - |
| <i>Prrx2</i>    | + | - |
| <i>Prrxl1</i>   | + | - |
| <i>Prss12</i>   | + | - |
| <i>Prss16</i>   | + | - |
| <i>Prss23</i>   | + | - |
| <i>Prss36</i>   | + | - |
| <i>Prss50</i>   | + | - |
| <i>Prss55</i>   | + | - |
| <i>Prss56</i>   | + | - |
| <i>Prtg</i>     | + | - |
| <i>Prtn3</i>    | + | - |
| <i>Prune2</i>   | + | - |
| <i>Psd2</i>     | + | - |
| <i>Psg16</i>    | + | - |
| <i>Psmas</i>    | + | - |
| <i>Psors1c2</i> | + | - |
| <i>Ptafr</i>    | + | - |
| <i>Ptch2</i>    | + | - |
| <i>Ptchd1</i>   | + | - |
| <i>Ptchd2</i>   | + | - |
| <i>Ptf1a</i>    | + | - |
| <i>Ptger3</i>   | + | - |
| <i>Ptges</i>    | + | - |
| <i>Ptgfrn</i>   | + | - |
| <i>Ptgir</i>    | + | - |
| <i>Ptgis</i>    | + | - |
| <i>Ptgs1</i>    | + | - |
| <i>Pth</i>      | + | - |
| <i>Pth1r</i>    | + | - |
| <i>Pth2</i>     | + | - |
| <i>Pth2r</i>    | + | - |

|                  |   |   |
|------------------|---|---|
| <i>Pthlh</i>     | + | - |
| <i>Ptk7</i>      | + | - |
| <i>Ptov1</i>     | + | - |
| <i>Ptpdc1</i>    | + | - |
| <i>Ptplad2</i>   | + | - |
| <i>Ptpn13</i>    | + | - |
| <i>Ptpn14</i>    | + | - |
| <i>Ptpn5</i>     | + | - |
| <i>Ptprb</i>     | + | - |
| <i>Ptpre</i>     | + | - |
| <i>Ptprf</i>     | + | - |
| <i>Ptprg</i>     | + | - |
| <i>Ptprm</i>     | + | - |
| <i>Ptprn</i>     | + | - |
| <i>Ptprn2</i>    | + | - |
| <i>Ptprt</i>     | + | - |
| <i>Ptpru</i>     | + | - |
| <i>Ptrf</i>      | + | - |
| <i>Ptx3</i>      | + | - |
| <i>Ptx4</i>      | + | - |
| <i>Pvalb</i>     | + | - |
| <i>Pvrl2</i>     | + | - |
| <i>Pvrl3</i>     | + | - |
| <i>Pvrl4</i>     | + | - |
| <i>Pygl</i>      | + | - |
| <i>Pygo1</i>     | + | - |
| <i>Pyy</i>       | + | - |
| <i>Qpct</i>      | + | - |
| <i>Rab11fip4</i> | + | - |
| <i>Rab13</i>     | + | - |
| <i>Rab15</i>     | + | - |
| <i>Rab33a</i>    | + | - |
| <i>Rab34</i>     | + | - |
| <i>Rab36</i>     | + | - |
| <i>Rab37</i>     | + | - |
| <i>Rab38</i>     | + | - |
| <i>Rab3b</i>     | + | - |
| <i>Rab3c</i>     | + | - |
| <i>Rab3il1</i>   | + | - |
| <i>Rab40b</i>    | + | - |
| <i>Rab4a</i>     | + | - |
| <i>Rab6b</i>     | + | - |
| <i>Rab9b</i>     | + | - |
| <i>Rac3</i>      | + | - |
| <i>Rad21l</i>    | + | - |
| <i>Rad51ap2</i>  | + | - |
| <i>Radil</i>     | + | - |
| <i>Raet1a</i>    | + | - |
| <i>Rag1</i>      | + | - |
| <i>Rag2</i>      | + | - |
| <i>Rai14</i>     | + | - |
| <i>Rai2</i>      | + | - |
| <i>Raly1</i>     | + | - |



|                 |   |   |
|-----------------|---|---|
| <i>Ramp1</i>    | + | - |
| <i>Ramp2</i>    | + | - |
| <i>Ranbp17</i>  | + | - |
| <i>Rap1gap</i>  | + | - |
| <i>Rap1gap2</i> | + | - |
| <i>Rapgef4</i>  | + | - |
| <i>Rapgef5</i>  | + | - |
| <i>Rapgef11</i> | + | - |
| <i>Rarb</i>     | + | - |
| <i>Rasal2</i>   | + | - |
| <i>Rasd2</i>    | + | - |
| <i>Rasgef1a</i> | + | - |
| <i>Rasgef1c</i> | + | - |
| <i>Rasgrf1</i>  | + | - |
| <i>Rasgrf2</i>  | + | - |
| <i>Rasip1</i>   | + | - |
| <i>Rasl10b</i>  | + | - |
| <i>Rasl11a</i>  | + | - |
| <i>Rasl12</i>   | + | - |
| <i>Rasl2-9</i>  | + | - |
| <i>Rassf10</i>  | + | - |
| <i>Raver2</i>   | + | - |
| <i>Rax</i>      | + | - |
| <i>Rbbp9</i>    | + | - |
| <i>Rbfox2</i>   | + | - |
| <i>Rbfox3</i>   | + | - |
| <i>Rbm20</i>    | + | - |
| <i>Rbm24</i>    | + | - |
| <i>Rbp1</i>     | + | - |
| <i>Rbp4</i>     | + | - |
| <i>Rbp7</i>     | + | - |
| <i>Rbpjl</i>    | + | - |
| <i>Rbpms2</i>   | + | - |
| <i>Rcan2</i>    | + | - |
| <i>Rcn3</i>     | + | - |
| <i>Rd3</i>      | + | - |
| <i>Rdh5</i>     | + | - |
| <i>Rdh8</i>     | + | - |
| <i>Rec8</i>     | + | - |
| <i>Reck</i>     | + | - |
| <i>Reep1</i>    | + | - |
| <i>Reep6</i>    | + | - |
| <i>Reln</i>     | + | - |
| <i>Rem1</i>     | + | - |
| <i>Rem2</i>     | + | - |
| <i>Rep15</i>    | + | - |
| <i>Reps2</i>    | + | - |
| <i>Rerg</i>     | + | - |
| <i>Resp18</i>   | + | - |
| <i>Ret</i>      | + | - |
| <i>Rfp14</i>    | + | - |
| <i>Rftn2</i>    | + | - |
| <i>Rfx2</i>     | + | - |

|                |   |   |
|----------------|---|---|
| <i>Rfx4</i>    | + | - |
| <i>Rfx6</i>    | + | - |
| <i>Rfx8</i>    | + | - |
| <i>Rgag4</i>   | + | - |
| <i>Rgl1</i>    | + | - |
| <i>Rgl3</i>    | + | - |
| <i>Rgma</i>    | + | - |
| <i>Rgn</i>     | + | - |
| <i>Rgs16</i>   | + | - |
| <i>Rgs17</i>   | + | - |
| <i>Rgs20</i>   | + | - |
| <i>Rgs22</i>   | + | - |
| <i>Rgs6</i>    | + | - |
| <i>Rgs7</i>    | + | - |
| <i>Rgs7bp</i>  | + | - |
| <i>Rgs8</i>    | + | - |
| <i>Rgs9</i>    | + | - |
| <i>Rhcg</i>    | + | - |
| <i>Rhd</i>     | + | - |
| <i>Rhobtb1</i> | + | - |
| <i>Rhobtb3</i> | + | - |
| <i>Rhoc</i>    | + | - |
| <i>Rhod</i>    | + | - |
| <i>Rhou</i>    | + | - |
| <i>Rhpn1</i>   | + | - |
| <i>Ribc2</i>   | + | - |
| <i>Riid1</i>   | + | - |
| <i>Rilp1</i>   | + | - |
| <i>Rimkla</i>  | + | - |
| <i>Rimklb</i>  | + | - |
| <i>Rims2</i>   | + | - |
| <i>Rims4</i>   | + | - |
| <i>Rin1</i>    | + | - |
| <i>Ripk4</i>   | + | - |
| <i>Ripply2</i> | + | - |
| <i>Rln1</i>    | + | - |
| <i>Rln3</i>    | + | - |
| <i>Rn45s</i>   | + | - |
| <i>Rnase11</i> | + | - |
| <i>Rnase9</i>  | + | - |
| <i>Rnasel</i>  | + | - |
| <i>Rnd1</i>    | + | - |
| <i>Rnd3</i>    | + | - |
| <i>Rnf112</i>  | + | - |
| <i>Rnf128</i>  | + | - |
| <i>Rnf144b</i> | + | - |
| <i>Rnf150</i>  | + | - |
| <i>Rnf152</i>  | + | - |
| <i>Rnf165</i>  | + | - |
| <i>Rnf17</i>   | + | - |
| <i>Rnf180</i>  | + | - |
| <i>Rnf182</i>  | + | - |
| <i>Rnf187</i>  | + | - |

|                |   |   |
|----------------|---|---|
| <i>Rnf207</i>  | + | - |
| <i>Rnf208</i>  | + | - |
| <i>Rnf217</i>  | + | - |
| <i>Rnf220</i>  | + | - |
| <i>Rnf32</i>   | + | - |
| <i>Rnf39</i>   | + | - |
| <i>Robo3</i>   | + | - |
| <i>Robo4</i>   | + | - |
| <i>Ror1</i>    | + | - |
| <i>Ror2</i>    | + | - |
| <i>Rora</i>    | + | - |
| <i>Rorb</i>    | + | - |
| <i>Rp111</i>   | + | - |
| <i>Rph3a</i>   | + | - |
| <i>Rpl3l</i>   | + | - |
| <i>Rpp25</i>   | + | - |
| <i>Rprm</i>    | + | - |
| <i>Rprml</i>   | + | - |
| <i>Rps6ka2</i> | + | - |
| <i>Rragd</i>   | + | - |
| <i>Rsph4a</i>  | + | - |
| <i>Rspo1</i>   | + | - |
| <i>Rspo3</i>   | + | - |
| <i>Rspo4</i>   | + | - |
| <i>Rtbdn</i>   | + | - |
| <i>Rtkn</i>    | + | - |
| <i>Rtn1</i>    | + | - |
| <i>Rtn2</i>    | + | - |
| <i>Rtn4r</i>   | + | - |
| <i>Rtn4rl1</i> | + | - |
| <i>Rtn4rl2</i> | + | - |
| <i>Rtp1</i>    | + | - |
| <i>Rtp2</i>    | + | - |
| <i>Rtp4</i>    | + | - |
| <i>Rundc3a</i> | + | - |
| <i>Runx1t1</i> | + | - |
| <i>Runx2</i>   | + | - |
| <i>Rusc2</i>   | + | - |
| <i>Rxfp3</i>   | + | - |
| <i>Rxra</i>    | + | - |
| <i>Rxrg</i>    | + | - |
| <i>Ryk</i>     | + | - |
| <i>Ryr1</i>    | + | - |
| <i>Ryr2</i>    | + | - |
| <i>S100a10</i> | + | - |
| <i>S100a16</i> | + | - |
| <i>S1pr5</i>   | + | - |
| <i>Saa2</i>    | + | - |
| <i>Saa3</i>    | + | - |
| <i>Saa4</i>    | + | - |
| <i>Sacs</i>    | + | - |
| <i>Sall1</i>   | + | - |
| <i>Sall2</i>   | + | - |

|                |   |   |
|----------------|---|---|
| <i>Sall3</i>   | + | - |
| <i>Sall4</i>   | + | - |
| <i>Samd14</i>  | + | - |
| <i>Samd4</i>   | + | - |
| <i>Samd5</i>   | + | - |
| <i>Sap25</i>   | + | - |
| <i>Sardh</i>   | + | - |
| <i>Sash1</i>   | + | - |
| <i>Sat2</i>    | + | - |
| <i>Satb2</i>   | + | - |
| <i>Sbf2</i>    | + | - |
| <i>Sbp</i>     | + | - |
| <i>Sbspon</i>  | + | - |
| <i>Scamp1</i>  | + | - |
| <i>Scamp5</i>  | + | - |
| <i>Scara3</i>  | + | - |
| <i>Scarf2</i>  | + | - |
| <i>Scd3</i>    | + | - |
| <i>Scel</i>    | + | - |
| <i>Scgb1c1</i> | + | - |
| <i>Scgn</i>    | + | - |
| <i>Schip1</i>  | + | - |
| <i>Scin</i>    | + | - |
| <i>Scml4</i>   | + | - |
| <i>Scn1b</i>   | + | - |
| <i>Scn2b</i>   | + | - |
| <i>Scn3b</i>   | + | - |
| <i>Scn4a</i>   | + | - |
| <i>Scn4b</i>   | + | - |
| <i>Scn5a</i>   | + | - |
| <i>Scn8a</i>   | + | - |
| <i>Scnn1b</i>  | + | - |
| <i>Scnn1g</i>  | + | - |
| <i>Scn1</i>    | + | - |
| <i>Scrt1</i>   | + | - |
| <i>Scrt2</i>   | + | - |
| <i>Sct</i>     | + | - |
| <i>Sctr</i>    | + | - |
| <i>Scube1</i>  | + | - |
| <i>Scube2</i>  | + | - |
| <i>Scube3</i>  | + | - |
| <i>Sdc3</i>    | + | - |
| <i>Sdcbp2</i>  | + | - |
| <i>Sdk1</i>    | + | - |
| <i>Sdk2</i>    | + | - |
| <i>Sebox</i>   | + | - |
| <i>Sec1</i>    | + | - |
| <i>Sec14l2</i> | + | - |
| <i>Sec14l5</i> | + | - |
| <i>Sel1l3</i>  | + | - |
| <i>Selplg</i>  | + | - |
| <i>Sema3c</i>  | + | - |
| <i>Sema3d</i>  | + | - |

|                  |   |   |
|------------------|---|---|
| <i>Sema3f</i>    | + | - |
| <i>Sema4a</i>    | + | - |
| <i>Sema4f</i>    | + | - |
| <i>Sema4g</i>    | + | - |
| <i>Sema5a</i>    | + | - |
| <i>Sema5b</i>    | + | - |
| <i>Sema6a</i>    | + | - |
| <i>Sema6d</i>    | + | - |
| <i>Sepr1</i>     | + | - |
| <i>Sept12</i>    | + | - |
| <i>Sept14</i>    | + | - |
| <i>Sept3</i>     | + | - |
| <i>Sept4</i>     | + | - |
| <i>Sept5</i>     | + | - |
| <i>Sept8</i>     | + | - |
| <i>Serinc2</i>   | + | - |
| <i>Serp2</i>     | + | - |
| <i>Serpinb1a</i> | + | - |
| <i>Serpine2</i>  | + | - |
| <i>Serpine3</i>  | + | - |
| <i>Serpinh1</i>  | + | - |
| <i>Sertad4</i>   | + | - |
| <i>Sestd1</i>    | + | - |
| <i>Sez6</i>      | + | - |
| <i>Sez6l</i>     | + | - |
| <i>Sez6l2</i>    | + | - |
| <i>Sfi1</i>      | + | - |
| <i>Sfmbt2</i>    | + | - |
| <i>Sfrp1</i>     | + | - |
| <i>Sfrp2</i>     | + | - |
| <i>Sfrp4</i>     | + | - |
| <i>Sfrp5</i>     | + | - |
| <i>Sftpc</i>     | + | - |
| <i>Sgca</i>      | + | - |
| <i>Sgce</i>      | + | - |
| <i>Sgcz</i>      | + | - |
| <i>Sgip1</i>     | + | - |
| <i>Sgpp2</i>     | + | - |
| <i>Sgsm1</i>     | + | - |
| <i>Sh2d4a</i>    | + | - |
| <i>Sh3bgr</i>    | + | - |
| <i>Sh3gl2</i>    | + | - |
| <i>Sh3pxd2b</i>  | + | - |
| <i>Sh3rf3</i>    | + | - |
| <i>Shank2</i>    | + | - |
| <i>Shank3</i>    | + | - |
| <i>Shb</i>       | + | - |
| <i>Shbg</i>      | + | - |
| <i>Shc2</i>      | + | - |
| <i>Shc3</i>      | + | - |
| <i>Shc4</i>      | + | - |
| <i>Shd</i>       | + | - |
| <i>She</i>       | + | - |

|                 |   |   |
|-----------------|---|---|
| <i>Shh</i>      | + | - |
| <i>Shisa2</i>   | + | - |
| <i>Shisa3</i>   | + | - |
| <i>Shisa4</i>   | + | - |
| <i>Shisa6</i>   | + | - |
| <i>Shisa7</i>   | + | - |
| <i>Shisa9</i>   | + | - |
| <i>Shroom1</i>  | + | - |
| <i>Shroom2</i>  | + | - |
| <i>Shroom3</i>  | + | - |
| <i>Siah3</i>    | + | - |
| <i>Sim1</i>     | + | - |
| <i>Sim2</i>     | + | - |
| <i>Sirpa</i>    | + | - |
| <i>Six1</i>     | + | - |
| <i>Six2</i>     | + | - |
| <i>Six3</i>     | + | - |
| <i>Six3os1</i>  | + | - |
| <i>Six4</i>     | + | - |
| <i>Six6</i>     | + | - |
| <i>Skap1</i>    | + | - |
| <i>Ski</i>      | + | - |
| <i>Skor1</i>    | + | - |
| <i>Skor2</i>    | + | - |
| <i>Slc10a1</i>  | + | - |
| <i>Slc10a4</i>  | + | - |
| <i>Slc10a5</i>  | + | - |
| <i>Slc11a1</i>  | + | - |
| <i>Slc12a5</i>  | + | - |
| <i>Slc12a8</i>  | + | - |
| <i>Slc13a2</i>  | + | - |
| <i>Slc13a3</i>  | + | - |
| <i>Slc13a5</i>  | + | - |
| <i>Slc15a1</i>  | + | - |
| <i>Slc16a11</i> | + | - |
| <i>Slc16a12</i> | + | - |
| <i>Slc16a14</i> | + | - |
| <i>Slc16a2</i>  | + | - |
| <i>Slc16a5</i>  | + | - |
| <i>Slc16a8</i>  | + | - |
| <i>Slc16a9</i>  | + | - |
| <i>Slc17a1</i>  | + | - |
| <i>Slc17a2</i>  | + | - |
| <i>Slc17a3</i>  | + | - |
| <i>Slc17a6</i>  | + | - |
| <i>Slc17a7</i>  | + | - |
| <i>Slc18a2</i>  | + | - |
| <i>Slc18a3</i>  | + | - |
| <i>Slc18b1</i>  | + | - |
| <i>Slc1a1</i>   | + | - |
| <i>Slc1a2</i>   | + | - |
| <i>Slc1a3</i>   | + | - |
| <i>Slc1a6</i>   | + | - |

|                 |   |   |
|-----------------|---|---|
| <i>Slc22a21</i> | + | - |
| <i>Slc22a23</i> | + | - |
| <i>Slc22a3</i>  | + | - |
| <i>Slc22a4</i>  | + | - |
| <i>Slc22a7</i>  | + | - |
| <i>Slc24a1</i>  | + | - |
| <i>Slc24a4</i>  | + | - |
| <i>Slc25a21</i> | + | - |
| <i>Slc25a41</i> | + | - |
| <i>Slc25a48</i> | + | - |
| <i>Slc26a10</i> | + | - |
| <i>Slc26a3</i>  | + | - |
| <i>Slc26a4</i>  | + | - |
| <i>Slc26a5</i>  | + | - |
| <i>Slc26a9</i>  | + | - |
| <i>Slc27a2</i>  | + | - |
| <i>Slc27a3</i>  | + | - |
| <i>Slc28a3</i>  | + | - |
| <i>Slc29a4</i>  | + | - |
| <i>Slc2a10</i>  | + | - |
| <i>Slc2a13</i>  | + | - |
| <i>Slc2a4</i>   | + | - |
| <i>Slc30a10</i> | + | - |
| <i>Slc30a2</i>  | + | - |
| <i>Slc30a3</i>  | + | - |
| <i>Slc32a1</i>  | + | - |
| <i>Slc34a1</i>  | + | - |
| <i>Slc34a3</i>  | + | - |
| <i>Slc35d3</i>  | + | - |
| <i>Slc35f1</i>  | + | - |
| <i>Slc35f3</i>  | + | - |
| <i>Slc35g2</i>  | + | - |
| <i>Slc38a3</i>  | + | - |
| <i>Slc38a4</i>  | + | - |
| <i>Slc38a5</i>  | + | - |
| <i>Slc40a1</i>  | + | - |
| <i>Slc44a3</i>  | + | - |
| <i>Slc44a5</i>  | + | - |
| <i>Slc45a1</i>  | + | - |
| <i>Slc45a3</i>  | + | - |
| <i>Slc46a2</i>  | + | - |
| <i>Slc47a1</i>  | + | - |
| <i>Slc47a2</i>  | + | - |
| <i>Slc4a10</i>  | + | - |
| <i>Slc4a3</i>   | + | - |
| <i>Slc4a4</i>   | + | - |
| <i>Slc4a9</i>   | + | - |
| <i>Slc51a</i>   | + | - |
| <i>Slc52a3</i>  | + | - |
| <i>Slc5a1</i>   | + | - |
| <i>Slc5a2</i>   | + | - |
| <i>Slc5a5</i>   | + | - |
| <i>Slc5a8</i>   | + | - |

|                  |   |   |
|------------------|---|---|
| <i>Slc6a1</i>    | + | - |
| <i>Slc6a13</i>   | + | - |
| <i>Slc6a17</i>   | + | - |
| <i>Slc6a20a</i>  | + | - |
| <i>Slc6a3</i>    | + | - |
| <i>Slc6a4</i>    | + | - |
| <i>Slc6a5</i>    | + | - |
| <i>Slc6a7</i>    | + | - |
| <i>Slc6a8</i>    | + | - |
| <i>Slc7a10</i>   | + | - |
| <i>Slc7a8</i>    | + | - |
| <i>Slc8a2</i>    | + | - |
| <i>Slc8a3</i>    | + | - |
| <i>Slc9a2</i>    | + | - |
| <i>Slc9a3</i>    | + | - |
| <i>Slc9a3r2</i>  | + | - |
| <i>Slc9b2</i>    | + | - |
| <i>Slco2a1</i>   | + | - |
| <i>Slco3a1</i>   | + | - |
| <i>Slfn14-ps</i> | + | - |
| <i>Slfn5</i>     | + | - |
| <i>Slfn8</i>     | + | - |
| <i>Slit1</i>     | + | - |
| <i>Slit2</i>     | + | - |
| <i>Slit3</i>     | + | - |
| <i>Slitrk5</i>   | + | - |
| <i>Smad9</i>     | + | - |
| <i>Smarca1</i>   | + | - |
| <i>Smarcd3</i>   | + | - |
| <i>Smc1b</i>     | + | - |
| <i>Smim1</i>     | + | - |
| <i>Smo</i>       | + | - |
| <i>Smoc1</i>     | + | - |
| <i>Smox</i>      | + | - |
| <i>Smpd3</i>     | + | - |
| <i>Smtnl1</i>    | + | - |
| <i>Smtnl2</i>    | + | - |
| <i>Smyd1</i>     | + | - |
| <i>Snai2</i>     | + | - |
| <i>Snai3</i>     | + | - |
| <i>Snap91</i>    | + | - |
| <i>Sncaip</i>    | + | - |
| <i>Sncb</i>      | + | - |
| <i>Sned1</i>     | + | - |
| <i>Snhg11</i>    | + | - |
| <i>Snord123</i>  | + | - |
| <i>Snord83b</i>  | + | - |
| <i>Snph</i>      | + | - |
| <i>Snta1</i>     | + | - |
| <i>Sntb1</i>     | + | - |
| <i>Sntg1</i>     | + | - |
| <i>Snx31</i>     | + | - |
| <i>Soat2</i>     | + | - |



|                   |   |   |
|-------------------|---|---|
| <i>Sobp</i>       | + | - |
| <i>Socs2</i>      | + | - |
| <i>Socs3</i>      | + | - |
| <i>Soga2</i>      | + | - |
| <i>Soga3</i>      | + | - |
| <i>Sorbs3</i>     | + | - |
| <i>Sorcs2</i>     | + | - |
| <i>Sort1</i>      | + | - |
| <i>Sost</i>       | + | - |
| <i>Sostdc1</i>    | + | - |
| <i>Sowaha</i>     | + | - |
| <i>Sowahb</i>     | + | - |
| <i>Sowahd</i>     | + | - |
| <i>Sox1</i>       | + | - |
| <i>Sox10</i>      | + | - |
| <i>Sox11</i>      | + | - |
| <i>Sox13</i>      | + | - |
| <i>Sox14</i>      | + | - |
| <i>Sox17</i>      | + | - |
| <i>Sox18</i>      | + | - |
| <i>Sox2</i>       | + | - |
| <i>Sox21</i>      | + | - |
| <i>Sox3</i>       | + | - |
| <i>Sox30</i>      | + | - |
| <i>Sox4</i>       | + | - |
| <i>Sox5</i>       | + | - |
| <i>Sox6</i>       | + | - |
| <i>Sox7</i>       | + | - |
| <i>Sox9</i>       | + | - |
| <i>Sp5</i>        | + | - |
| <i>Sp6</i>        | + | - |
| <i>Sp7</i>        | + | - |
| <i>Sp8</i>        | + | - |
| <i>Sp9</i>        | + | - |
| <i>Spag6</i>      | + | - |
| <i>Sparc</i>      | + | - |
| <i>Spata20</i>    | + | - |
| <i>Spata3</i>     | + | - |
| <i>Spata31d1a</i> | + | - |
| <i>Spats2</i>     | + | - |
| <i>Spats2l</i>    | + | - |
| <i>Specc1</i>     | + | - |
| <i>Spf1</i>       | + | - |
| <i>Speg</i>       | + | - |
| <i>Spem1</i>      | + | - |
| <i>Spesp1</i>     | + | - |
| <i>Sphk1</i>      | + | - |
| <i>Spin4</i>      | + | - |
| <i>Spint1</i>     | + | - |
| <i>Spint4</i>     | + | - |
| <i>Spire2</i>     | + | - |
| <i>Spns2</i>      | + | - |
| <i>Spock2</i>     | + | - |

|                   |   |   |
|-------------------|---|---|
| <i>Spon1</i>      | + | - |
| <i>Sprn</i>       | + | - |
| <i>Spry1</i>      | + | - |
| <i>Spsb4</i>      | + | - |
| <i>Sptbn2</i>     | + | - |
| <i>Sptssb</i>     | + | - |
| <i>Spz1</i>       | + | - |
| <i>Sqrdl</i>      | + | - |
| <i>Src</i>        | + | - |
| <i>Srcin1</i>     | + | - |
| <i>Srd5a2</i>     | + | - |
| <i>Srgap1</i>     | + | - |
| <i>Srgap3</i>     | + | - |
| <i>Srsf12</i>     | + | - |
| <i>Srxn1</i>      | + | - |
| <i>Ssc5d</i>      | + | - |
| <i>Sspo</i>       | + | - |
| <i>Sst</i>        | + | - |
| <i>Sstr2</i>      | + | - |
| <i>Sstr3</i>      | + | - |
| <i>Sstr4</i>      | + | - |
| <i>Sstr5</i>      | + | - |
| <i>St5</i>        | + | - |
| <i>St6galnac2</i> | + | - |
| <i>St6galnac5</i> | + | - |
| <i>St8sia1</i>    | + | - |
| <i>St8sia5</i>    | + | - |
| <i>Stab1</i>      | + | - |
| <i>Stag3</i>      | + | - |
| <i>Stard13</i>    | + | - |
| <i>Stard8</i>     | + | - |
| <i>Stc1</i>       | + | - |
| <i>Stc2</i>       | + | - |
| <i>Steap1</i>     | + | - |
| <i>Steap2</i>     | + | - |
| <i>Stk31</i>      | + | - |
| <i>Stk33</i>      | + | - |
| <i>Stk39</i>      | + | - |
| <i>Stmn3</i>      | + | - |
| <i>Stmn4</i>      | + | - |
| <i>Ston2</i>      | + | - |
| <i>Stox2</i>      | + | - |
| <i>Stra6</i>      | + | - |
| <i>Stra8</i>      | + | - |
| <i>Strc</i>       | + | - |
| <i>Stx1b</i>      | + | - |
| <i>Stx3</i>       | + | - |
| <i>Stxbp5l</i>    | + | - |
| <i>Sulf1</i>      | + | - |
| <i>Sulf2</i>      | + | - |
| <i>Sult2b1</i>    | + | - |
| <i>Sult4a1</i>    | + | - |
| <i>Sult6b1</i>    | + | - |

|                 |   |   |
|-----------------|---|---|
| <i>Sun3</i>     | + | - |
| <i>Susd4</i>    | + | - |
| <i>Susd5</i>    | + | - |
| <i>Sv2a</i>     | + | - |
| <i>Sv2b</i>     | + | - |
| <i>Sv2c</i>     | + | - |
| <i>Svep1</i>    | + | - |
| <i>Svip</i>     | + | - |
| <i>Svop</i>     | + | - |
| <i>Svs2</i>     | + | - |
| <i>Svs3a</i>    | + | - |
| <i>Svs3b</i>    | + | - |
| <i>Svs4</i>     | + | - |
| <i>Svs5</i>     | + | - |
| <i>Svs6</i>     | + | - |
| <i>Sybu</i>     | + | - |
| <i>Sycn</i>     | + | - |
| <i>Sycp1</i>    | + | - |
| <i>Syde1</i>    | + | - |
| <i>Syde2</i>    | + | - |
| <i>Syn1</i>     | + | - |
| <i>Syn2</i>     | + | - |
| <i>Synb</i>     | + | - |
| <i>Sync</i>     | + | - |
| <i>Syndig1l</i> | + | - |
| <i>Syngr3</i>   | + | - |
| <i>Synm</i>     | + | - |
| <i>Synpo</i>    | + | - |
| <i>Synpo2</i>   | + | - |
| <i>Synpo2l</i>  | + | - |
| <i>Syp</i>      | + | - |
| <i>Sypl2</i>    | + | - |
| <i>Syt12</i>    | + | - |
| <i>Syt13</i>    | + | - |
| <i>Syt14</i>    | + | - |
| <i>Syt15</i>    | + | - |
| <i>Syt16</i>    | + | - |
| <i>Syt17</i>    | + | - |
| <i>Syt2</i>     | + | - |
| <i>Syt3</i>     | + | - |
| <i>Syt5</i>     | + | - |
| <i>Syt6</i>     | + | - |
| <i>Syt7</i>     | + | - |
| <i>Syt8</i>     | + | - |
| <i>Syt9</i>     | + | - |
| <i>Syt14</i>    | + | - |
| <i>T</i>        | + | - |
| <i>Tac1</i>     | + | - |
| <i>Tac2</i>     | + | - |
| <i>Tac4</i>     | + | - |
| <i>Tacc2</i>    | + | - |
| <i>Tacstd2</i>  | + | - |
| <i>Tagln3</i>   | + | - |

|                 |   |   |
|-----------------|---|---|
| <i>Tal1</i>     | + | - |
| <i>Tal2</i>     | + | - |
| <i>Tanc2</i>    | + | - |
| <i>Tas1r2</i>   | + | - |
| <i>Tbata</i>    | + | - |
| <i>Tbc1d16</i>  | + | - |
| <i>Tbc1d24</i>  | + | - |
| <i>Tbc1d2b</i>  | + | - |
| <i>Tbc1d30</i>  | + | - |
| <i>Tbc1d8</i>   | + | - |
| <i>Tbkbp1</i>   | + | - |
| <i>Tbr1</i>     | + | - |
| <i>Tbx1</i>     | + | - |
| <i>Tbx10</i>    | + | - |
| <i>Tbx15</i>    | + | - |
| <i>Tbx18</i>    | + | - |
| <i>Tbx2</i>     | + | - |
| <i>Tbx20</i>    | + | - |
| <i>Tbx3</i>     | + | - |
| <i>Tbx4</i>     | + | - |
| <i>Tbx5</i>     | + | - |
| <i>Tc2n</i>     | + | - |
| <i>Tcap</i>     | + | - |
| <i>Tcea3</i>    | + | - |
| <i>Tceal1</i>   | + | - |
| <i>Tcf15</i>    | + | - |
| <i>Tcf20</i>    | + | - |
| <i>Tcf21</i>    | + | - |
| <i>Tcf23</i>    | + | - |
| <i>Tcf7</i>     | + | - |
| <i>Tcf7l1</i>   | + | - |
| <i>Tcf15</i>    | + | - |
| <i>Tchh</i>     | + | - |
| <i>Tcte1</i>    | + | - |
| <i>Tcte2</i>    | + | - |
| <i>Tctex1d1</i> | + | - |
| <i>Tdgf1</i>    | + | - |
| <i>Tdh</i>      | + | - |
| <i>Tdo2</i>     | + | - |
| <i>Tdrd1</i>    | + | - |
| <i>Tdrd5</i>    | + | - |
| <i>Tdrd6</i>    | + | - |
| <i>Tdrd9</i>    | + | - |
| <i>Tdrkh</i>    | + | - |
| <i>Tead1</i>    | + | - |
| <i>Tead2</i>    | + | - |
| <i>Tead4</i>    | + | - |
| <i>Teddm1</i>   | + | - |
| <i>Tekt1</i>    | + | - |
| <i>Tekt2</i>    | + | - |
| <i>Tekt4</i>    | + | - |
| <i>Tenc1</i>    | + | - |
| <i>Tenm4</i>    | + | - |

|                |   |   |
|----------------|---|---|
| <i>Tesc1</i>   | + | - |
| <i>Tet1</i>    | + | - |
| <i>Tex12</i>   | + | - |
| <i>Tex15</i>   | + | - |
| <i>Tex21</i>   | + | - |
| <i>Tex26</i>   | + | - |
| <i>Tex37</i>   | + | - |
| <i>Tex40</i>   | + | - |
| <i>Tfap2b</i>  | + | - |
| <i>Tfap2c</i>  | + | - |
| <i>Tfap2e</i>  | + | - |
| <i>Tfcp2l1</i> | + | - |
| <i>Tfr2</i>    | + | - |
| <i>Tgfa</i>    | + | - |
| <i>Tgfb1i1</i> | + | - |
| <i>Tgfb2</i>   | + | - |
| <i>Tgfb3</i>   | + | - |
| <i>Tgfr3</i>   | + | - |
| <i>Tgm1</i>    | + | - |
| <i>Tgm2</i>    | + | - |
| <i>Tgm5</i>    | + | - |
| <i>Tgm7</i>    | + | - |
| <i>Thbd</i>    | + | - |
| <i>Thbs1</i>   | + | - |
| <i>Thbs4</i>   | + | - |
| <i>Thns12</i>  | + | - |
| <i>Thpo</i>    | + | - |
| <i>Thrb</i>    | + | - |
| <i>Thsd1</i>   | + | - |
| <i>Thsd7a</i>  | + | - |
| <i>Thsd7b</i>  | + | - |
| <i>Thy1</i>    | + | - |
| <i>Tiam1</i>   | + | - |
| <i>Tiam2</i>   | + | - |
| <i>Tifab</i>   | + | - |
| <i>Tigd4</i>   | + | - |
| <i>Timp2</i>   | + | - |
| <i>Timp3</i>   | + | - |
| <i>Tinagl1</i> | + | - |
| <i>Tjp1</i>    | + | - |
| <i>Tle2</i>    | + | - |
| <i>Tle6</i>    | + | - |
| <i>Tll1</i>    | + | - |
| <i>Tll2</i>    | + | - |
| <i>Tlr5</i>    | + | - |
| <i>Tlx1</i>    | + | - |
| <i>Tlx2</i>    | + | - |
| <i>Tlx3</i>    | + | - |
| <i>Tm4sf5</i>  | + | - |
| <i>Tmc3</i>    | + | - |
| <i>Tmc5</i>    | + | - |
| <i>Tmc7</i>    | + | - |
| <i>Tmcc2</i>   | + | - |

|                 |   |   |
|-----------------|---|---|
| <i>Tmco2</i>    | + | - |
| <i>Tmeff2</i>   | + | - |
| <i>Tmem102</i>  | + | - |
| <i>Tmem117</i>  | + | - |
| <i>Tmem119</i>  | + | - |
| <i>Tmem130</i>  | + | - |
| <i>Tmem132a</i> | + | - |
| <i>Tmem132b</i> | + | - |
| <i>Tmem132e</i> | + | - |
| <i>Tmem136</i>  | + | - |
| <i>Tmem139</i>  | + | - |
| <i>Tmem141</i>  | + | - |
| <i>Tmem145</i>  | + | - |
| <i>Tmem150b</i> | + | - |
| <i>Tmem150c</i> | + | - |
| <i>Tmem151a</i> | + | - |
| <i>Tmem151b</i> | + | - |
| <i>Tmem163</i>  | + | - |
| <i>Tmem178</i>  | + | - |
| <i>Tmem190</i>  | + | - |
| <i>Tmem200a</i> | + | - |
| <i>Tmem200b</i> | + | - |
| <i>Tmem202</i>  | + | - |
| <i>Tmem210</i>  | + | - |
| <i>Tmem211</i>  | + | - |
| <i>Tmem220</i>  | + | - |
| <i>Tmem232</i>  | + | - |
| <i>Tmem235</i>  | + | - |
| <i>Tmem239</i>  | + | - |
| <i>Tmem246</i>  | + | - |
| <i>Tmem255b</i> | + | - |
| <i>Tmem28</i>   | + | - |
| <i>Tmem30b</i>  | + | - |
| <i>Tmem35</i>   | + | - |
| <i>Tmem37</i>   | + | - |
| <i>Tmem40</i>   | + | - |
| <i>Tmem44</i>   | + | - |
| <i>Tmem45b</i>  | + | - |
| <i>Tmem52</i>   | + | - |
| <i>Tmem54</i>   | + | - |
| <i>Tmem56</i>   | + | - |
| <i>Tmem59l</i>  | + | - |
| <i>Tmem63c</i>  | + | - |
| <i>Tmem74b</i>  | + | - |
| <i>Tmem88b</i>  | + | - |
| <i>Tmem91</i>   | + | - |
| <i>Tmem98</i>   | + | - |
| <i>Tmie</i>     | + | - |
| <i>Tmigd1</i>   | + | - |
| <i>Tmod1</i>    | + | - |
| <i>Tmod2</i>    | + | - |
| <i>Tmprss12</i> | + | - |
| <i>Tmprss13</i> | + | - |

|                  |   |   |
|------------------|---|---|
| <i>Tmprss2</i>   | + | - |
| <i>Tnfaip2</i>   | + | - |
| <i>Tnfaip6</i>   | + | - |
| <i>Tnfaip8l3</i> | + | - |
| <i>Tnfrsf10b</i> | + | - |
| <i>Tnfrsf11a</i> | + | - |
| <i>Tnfrsf19</i>  | + | - |
| <i>Tnfrsf1a</i>  | + | - |
| <i>Tnfrsf23</i>  | + | - |
| <i>Tnfrsf25</i>  | + | - |
| <i>Tnfrsf9</i>   | + | - |
| <i>Tnfsf11</i>   | + | - |
| <i>Tnfsf12</i>   | + | - |
| <i>Tnfsf13</i>   | + | - |
| <i>Tnfsf13b</i>  | + | - |
| <i>Tnfsf4</i>    | + | - |
| <i>Tnik</i>      | + | - |
| <i>Tnk1</i>      | + | - |
| <i>Tnn</i>       | + | - |
| <i>Tnnc2</i>     | + | - |
| <i>Tnni1</i>     | + | - |
| <i>Tnxb</i>      | + | - |
| <i>Tom11</i>     | + | - |
| <i>Topaz1</i>    | + | - |
| <i>Tox2</i>      | + | - |
| <i>Tox3</i>      | + | - |
| <i>Tpbp</i>      | + | - |
| <i>Tph1</i>      | + | - |
| <i>Tpm2</i>      | + | - |
| <i>Tppp2</i>     | + | - |
| <i>Tppp3</i>     | + | - |
| <i>Trank1</i>    | + | - |
| <i>Trcg1</i>     | + | - |
| <i>Treh</i>      | + | - |
| <i>Trf</i>       | + | - |
| <i>Trh</i>       | + | - |
| <i>Tril</i>      | + | - |
| <i>Trim10</i>    | + | - |
| <i>Trim15</i>    | + | - |
| <i>Trim16</i>    | + | - |
| <i>Trim17</i>    | + | - |
| <i>Trim30b</i>   | + | - |
| <i>Trim47</i>    | + | - |
| <i>Trim54</i>    | + | - |
| <i>Trim58</i>    | + | - |
| <i>Trim6</i>     | + | - |
| <i>Trim62</i>    | + | - |
| <i>Trim67</i>    | + | - |
| <i>Trim71</i>    | + | - |
| <i>Trim9</i>     | + | - |
| <i>Trio</i>      | + | - |
| <i>Trnp1</i>     | + | - |
| <i>Tro</i>       | + | - |

|                 |   |   |
|-----------------|---|---|
| <i>Trpa1</i>    | + | - |
| <i>Trpc1</i>    | + | - |
| <i>Trpc3</i>    | + | - |
| <i>Trpc5</i>    | + | - |
| <i>Trpd52l3</i> | + | - |
| <i>Trpm2</i>    | + | - |
| <i>Trpm3</i>    | + | - |
| <i>Trpm6</i>    | + | - |
| <i>Trpm8</i>    | + | - |
| <i>Trpv4</i>    | + | - |
| <i>Tsc22d1</i>  | + | - |
| <i>Tsga13</i>   | + | - |
| <i>Tshb</i>     | + | - |
| <i>Tshr</i>     | + | - |
| <i>Tshz3</i>    | + | - |
| <i>Tsix</i>     | + | - |
| <i>Tsk</i>      | + | - |
| <i>Tsku</i>     | + | - |
| <i>Tslp</i>     | + | - |
| <i>Tspan12</i>  | + | - |
| <i>Tspan15</i>  | + | - |
| <i>Tspan18</i>  | + | - |
| <i>Tspan7</i>   | + | - |
| <i>Tspan9</i>   | + | - |
| <i>Ttbk1</i>    | + | - |
| <i>Ttc22</i>    | + | - |
| <i>Ttc24</i>    | + | - |
| <i>Ttc34</i>    | + | - |
| <i>Ttc36</i>    | + | - |
| <i>Ttc39a</i>   | + | - |
| <i>Ttc39c</i>   | + | - |
| <i>Ttc9</i>     | + | - |
| <i>Ttc9b</i>    | + | - |
| <i>Ttll1</i>    | + | - |
| <i>Ttll6</i>    | + | - |
| <i>Ttll7</i>    | + | - |
| <i>Ttll8</i>    | + | - |
| <i>Ttpa</i>     | + | - |
| <i>Ttyh1</i>    | + | - |
| <i>Tub</i>      | + | - |
| <i>Tuba8</i>    | + | - |
| <i>Tubal3</i>   | + | - |
| <i>Tubb3</i>    | + | - |
| <i>Tubb4a</i>   | + | - |
| <i>Tubb6</i>    | + | - |
| <i>Tubg2</i>    | + | - |
| <i>Tulp1</i>    | + | - |
| <i>Tusc1</i>    | + | - |
| <i>Tusc5</i>    | + | - |
| <i>Twist1</i>   | + | - |
| <i>Twist2</i>   | + | - |
| <i>Txk</i>      | + | - |
| <i>Tyro3</i>    | + | - |



|                 |   |   |
|-----------------|---|---|
| <i>U90926</i>   | + | - |
| <i>Uaca</i>     | + | - |
| <i>Ubash3a</i>  | + | - |
| <i>Ubd</i>      | + | - |
| <i>Ube2e2</i>   | + | - |
| <i>Ube2ql1</i>  | + | - |
| <i>Ubxn10</i>   | + | - |
| <i>Uchl1</i>    | + | - |
| <i>Ucn</i>      | + | - |
| <i>Ucn3</i>     | + | - |
| <i>Ucp1</i>     | + | - |
| <i>Ugt1a1</i>   | + | - |
| <i>Ugt1a2</i>   | + | - |
| <i>Unc13a</i>   | + | - |
| <i>Unc45b</i>   | + | - |
| <i>Unc5a</i>    | + | - |
| <i>Unc79</i>    | + | - |
| <i>Unc80</i>    | + | - |
| <i>Uncx</i>     | + | - |
| <i>Upk2</i>     | + | - |
| <i>Upk3a</i>    | + | - |
| <i>Upk3bl</i>   | + | - |
| <i>Upp1</i>     | + | - |
| <i>Ush1g</i>    | + | - |
| <i>Usp29</i>    | + | - |
| <i>Usp31</i>    | + | - |
| <i>Usp35</i>    | + | - |
| <i>Usp37</i>    | + | - |
| <i>Usp43</i>    | + | - |
| <i>Ust</i>      | + | - |
| <i>Utf1</i>     | + | - |
| <i>Utrn</i>     | + | - |
| <i>Uts2r</i>    | + | - |
| <i>Vangl1</i>   | + | - |
| <i>Vash1</i>    | + | - |
| <i>Vash2</i>    | + | - |
| <i>Vax1</i>     | + | - |
| <i>Vax2</i>     | + | - |
| <i>Vax2os</i>   | + | - |
| <i>Vcan</i>     | + | - |
| <i>Vegfa</i>    | + | - |
| <i>Vegfc</i>    | + | - |
| <i>Vgf</i>      | + | - |
| <i>Vgl2</i>     | + | - |
| <i>Vgl3</i>     | + | - |
| <i>Vil1</i>     | + | - |
| <i>Vipr1</i>    | + | - |
| <i>Vipr2</i>    | + | - |
| <i>Vldlr</i>    | + | - |
| <i>Vmn1r21</i>  | + | - |
| <i>Vmn1r233</i> | + | - |
| <i>Vmn1r234</i> | + | - |
| <i>Vmn1r235</i> | + | - |

|                 |   |   |
|-----------------|---|---|
| <i>Vmn1r236</i> | + | - |
| <i>Vmn1r237</i> | + | - |
| <i>Vmn1r32</i>  | + | - |
| <i>Vmn1r33</i>  | + | - |
| <i>Vmn1r34</i>  | + | - |
| <i>Vmn1r35</i>  | + | - |
| <i>Vmn1r38</i>  | + | - |
| <i>Vmn1r39</i>  | + | - |
| <i>Vmn1r55</i>  | + | - |
| <i>Vmn2r83</i>  | + | - |
| <i>Vps37d</i>   | + | - |
| <i>Vrtn</i>     | + | - |
| <i>Vsig1</i>    | + | - |
| <i>Vsig2</i>    | + | - |
| <i>Vsig8</i>    | + | - |
| <i>Vsnl1</i>    | + | - |
| <i>Vstm2a</i>   | + | - |
| <i>Vstm2l</i>   | + | - |
| <i>Vstm4</i>    | + | - |
| <i>Vstm5</i>    | + | - |
| <i>Vsx1</i>     | + | - |
| <i>Vsx2</i>     | + | - |
| <i>Vwa1</i>     | + | - |
| <i>Vwa2</i>     | + | - |
| <i>Vwa5b2</i>   | + | - |
| <i>Vwc2</i>     | + | - |
| <i>Vwce</i>     | + | - |
| <i>Wasf3</i>    | + | - |
| <i>Wbp2nl</i>   | + | - |
| <i>Wbscr25</i>  | + | - |
| <i>Wdfy3</i>    | + | - |
| <i>Wdr41</i>    | + | - |
| <i>Wdr52</i>    | + | - |
| <i>Wdr60</i>    | + | - |
| <i>Wdr63</i>    | + | - |
| <i>Wdr86</i>    | + | - |
| <i>Wdr96</i>    | + | - |
| <i>Wee2</i>     | + | - |
| <i>Wfdc1</i>    | + | - |
| <i>Wfdc12</i>   | + | - |
| <i>Wfdc15b</i>  | + | - |
| <i>Wfdc17</i>   | + | - |
| <i>Wfdc18</i>   | + | - |
| <i>Wfdc2</i>    | + | - |
| <i>Wfdc3</i>    | + | - |
| <i>Wfdc5</i>    | + | - |
| <i>Wfikkn2</i>  | + | - |
| <i>Wipf1</i>    | + | - |
| <i>Wisp3</i>    | + | - |
| <i>Wnk2</i>     | + | - |
| <i>Wnk4</i>     | + | - |
| <i>Wnt1</i>     | + | - |
| <i>Wnt10a</i>   | + | - |

|                |   |   |
|----------------|---|---|
| <i>Wnt10b</i>  | + | - |
| <i>Wnt11</i>   | + | - |
| <i>Wnt16</i>   | + | - |
| <i>Wnt2</i>    | + | - |
| <i>Wnt2b</i>   | + | - |
| <i>Wnt3</i>    | + | - |
| <i>Wnt3a</i>   | + | - |
| <i>Wnt4</i>    | + | - |
| <i>Wnt5a</i>   | + | - |
| <i>Wnt5b</i>   | + | - |
| <i>Wnt6</i>    | + | - |
| <i>Wnt7a</i>   | + | - |
| <i>Wnt7b</i>   | + | - |
| <i>Wnt8a</i>   | + | - |
| <i>Wnt8b</i>   | + | - |
| <i>Wnt9a</i>   | + | - |
| <i>Wnt9b</i>   | + | - |
| <i>Wscd1</i>   | + | - |
| <i>Wscd2</i>   | + | - |
| <i>Wt1</i>     | + | - |
| <i>Wtip</i>    | + | - |
| <i>Wwc1</i>    | + | - |
| <i>Wwc2</i>    | + | - |
| <i>Wwtr1</i>   | + | - |
| <i>Xkr4</i>    | + | - |
| <i>Xkr6</i>    | + | - |
| <i>Xkr7</i>    | + | - |
| <i>Xkr9</i>    | + | - |
| <i>Yap1</i>    | + | - |
| <i>Ybx2</i>    | + | - |
| <i>Ypel4</i>   | + | - |
| <i>Zap70</i>   | + | - |
| <i>Zar1</i>    | + | - |
| <i>Zbtb10</i>  | + | - |
| <i>Zbtb16</i>  | + | - |
| <i>Zbtb46</i>  | + | - |
| <i>Zbtb8b</i>  | + | - |
| <i>Zc3h12b</i> | + | - |
| <i>Zcchc13</i> | + | - |
| <i>Zcchc14</i> | + | - |
| <i>Zcchc16</i> | + | - |
| <i>Zcchc3</i>  | + | - |
| <i>Zdbf2</i>   | + | - |
| <i>Zdhhc19</i> | + | - |
| <i>Zdhhc22</i> | + | - |
| <i>Zfhx2as</i> | + | - |
| <i>Zfhx3</i>   | + | - |
| <i>Zfhx4</i>   | + | - |
| <i>Zfp105</i>  | + | - |
| <i>Zfp185</i>  | + | - |
| <i>Zfp287</i>  | + | - |
| <i>Zfp334</i>  | + | - |
| <i>Zfp354b</i> | + | - |

|               |   |   |
|---------------|---|---|
| Zfp37         | + | - |
| Zfp385c       | + | - |
| Zfp423        | + | - |
| Zfp454        | + | - |
| Zfp462        | + | - |
| Zfp503        | + | - |
| Zfp521        | + | - |
| Zfp532        | + | - |
| Zfp536        | + | - |
| Zfp57         | + | - |
| Zfp572        | + | - |
| Zfp618        | + | - |
| Zfp629        | + | - |
| Zfp641        | + | - |
| Zfp648        | + | - |
| Zfp651        | + | - |
| Zfp658        | + | - |
| Zfp663        | + | - |
| Zfp697        | + | - |
| Zfp704        | + | - |
| Zfp811        | + | - |
| Zfp819        | + | - |
| Zfp872        | + | - |
| Zfp9          | + | - |
| Zfp92         | + | - |
| Zfp941        | + | - |
| Zfp957        | + | - |
| Zfp959        | + | - |
| Zfyve28       | + | - |
| Zfyve9        | + | - |
| Zg16          | + | - |
| Zic1          | + | - |
| Zic2          | + | - |
| Zic3          | + | - |
| Zic4          | + | - |
| Zic5          | + | - |
| Zkscan2       | + | - |
| Zkscan4       | + | - |
| Zmynd10       | + | - |
| Zmynd15       | + | - |
| Znrf4         | + | - |
| Zp3r          | + | - |
| Zyg11a        | + | - |
| 0610007P14Rik | - | + |
| 0610009B22Rik | - | + |
| 0610009D07Rik | - | + |
| 0610009L18Rik | - | + |
| 0610009O20Rik | - | + |
| 0610010F05Rik | - | + |
| 0610010K14Rik | - | + |
| 0610011F06Rik | - | + |
| 0610012G03Rik | - | + |
| 0610030E20Rik | - | + |

|               |   |   |
|---------------|---|---|
| 0610031J06Rik | - | + |
| 0610037L13Rik | - | + |
| 0610039K10Rik | - | + |
| 0610040B10Rik | - | + |
| 1110001J03Rik | - | + |
| 1110002L01Rik | - | + |
| 1110004E09Rik | - | + |
| 1110006O24Rik | - | + |
| 1110008F13Rik | - | + |
| 1110008J03Rik | - | + |
| 1110008L16Rik | - | + |
| 1110012L19Rik | - | + |
| 1110018G07Rik | - | + |
| 1110019D14Rik | - | + |
| 1110020A21Rik | - | + |
| 1110032A03Rik | - | + |
| 1110036E04Rik | - | + |
| 1110037F02Rik | - | + |
| 1110054M08Rik | - | + |
| 1110057K04Rik | - | + |
| 1110059E24Rik | - | + |
| 1110059G10Rik | - | + |
| 1110065P20Rik | - | + |
| 1190002F15Rik | - | + |
| 1190007I07Rik | - | + |
| 1200011I18Rik | - | + |
| 1200014J11Rik | - | + |
| 1300002E11Rik | - | + |
| 1300018J18Rik | - | + |
| 1500011B03Rik | - | + |
| 1500012F01Rik | - | + |
| 1500015A07Rik | - | + |
| 1600002H07Rik | - | + |
| 1600002K03Rik | - | + |
| 1600012H06Rik | - | + |
| 1600014C10Rik | - | + |
| 1600016N20Rik | - | + |
| 1600020E01Rik | - | + |
| 1600023N17Rik | - | + |
| 1700001G11Rik | - | + |
| 1700007L15Rik | - | + |
| 1700010I14Rik | - | + |
| 1700011J10Rik | - | + |
| 1700012B15Rik | - | + |
| 1700012D01Rik | - | + |
| 1700012D14Rik | - | + |
| 1700016L04Rik | - | + |
| 1700017B05Rik | - | + |
| 1700018L02Rik | - | + |
| 1700019G17Rik | - | + |
| 1700020I14Rik | - | + |
| 1700021F05Rik | - | + |
| 1700021K19Rik | - | + |

|               |   |   |
|---------------|---|---|
| 1700028E10Rik | - | + |
| 1700029J07Rik | - | + |
| 1700031P21Rik | - | + |
| 1700034F02Rik | - | + |
| 1700034H15Rik | - | + |
| 1700034P13Rik | - | + |
| 1700037C18Rik | - | + |
| 1700040L02Rik | - | + |
| 1700049G17Rik | - | + |
| 1700052K11Rik | - | + |
| 1700052N19Rik | - | + |
| 1700056E22Rik | - | + |
| 1700063D05Rik | - | + |
| 1700064M15Rik | - | + |
| 1700065D16Rik | - | + |
| 1700066M21Rik | - | + |
| 1700084E18Rik | - | + |
| 1700086O06Rik | - | + |
| 1700092M07Rik | - | + |
| 1700096K18Rik | - | + |
| 1700102H20Rik | - | + |
| 1700120C14Rik | - | + |
| 1700123M08Rik | - | + |
| 1700123O20Rik | - | + |
| 1700125G22Rik | - | + |
| 1810009A15Rik | - | + |
| 1810012K16Rik | - | + |
| 1810013L24Rik | - | + |
| 1810014B01Rik | - | + |
| 1810021B22Rik | - | + |
| 1810022K09Rik | - | + |
| 1810024B03Rik | - | + |
| 1810026B05Rik | - | + |
| 1810026J23Rik | - | + |
| 1810030O07Rik | - | + |
| 1810032O08Rik | - | + |
| 1810034E14Rik | - | + |
| 1810037I17Rik | - | + |
| 1810043H04Rik | - | + |
| 1810058I24Rik | - | + |
| 1810062O18Rik | - | + |
| 2010003O02Rik | - | + |
| 2010012O05Rik | - | + |
| 2010107E04Rik | - | + |
| 2010109A12Rik | - | + |
| 2010204K13Rik | - | + |
| 2010320M18Rik | - | + |
| 2200002D01Rik | - | + |
| 2210013O21Rik | - | + |
| 2210015D19Rik | - | + |
| 2210016F16Rik | - | + |
| 2210016L21Rik | - | + |
| 2210018M11Rik | - | + |

|                |   |   |
|----------------|---|---|
| 2210404O07Rik  | - | + |
| 2210404O09Rik  | - | + |
| 2210408I21Rik  | - | + |
| 2210417K05Rik  | - | + |
| 2300009A05Rik  | - | + |
| 2310001H17Rik  | - | + |
| 2310003H01Rik  | - | + |
| 2310008H09Rik  | - | + |
| 2310009A05Rik  | - | + |
| 2310009B15Rik  | - | + |
| 2310010J17Rik  | - | + |
| 2310011J03Rik  | - | + |
| 2310015A10Rik  | - | + |
| 2310022A10Rik  | - | + |
| 2310022B05Rik  | - | + |
| 2310033P09Rik  | - | + |
| 2310035C23Rik  | - | + |
| 2310036O22Rik  | - | + |
| 2310039H08Rik  | - | + |
| 2310045N01Rik  | - | + |
| 2310047M10Rik  | - | + |
| 2310050B05Rik  | - | + |
| 2310061I04Rik  | - | + |
| 2310061J03Rik  | - | + |
| 2310067B10Rik  | - | + |
| 2410002F23Rik  | - | + |
| 2410004B18Rik  | - | + |
| 2410006H16Rik  | - | + |
| 2410015M20Rik  | - | + |
| 2410016O06Rik  | - | + |
| 2410018M08Rik  | - | + |
| 2410127L17Rik  | - | + |
| 2410131K14Rik  | - | + |
| 2500004C02Rik  | - | + |
| 2510002D24Rik  | - | + |
| 2510003E04Rik  | - | + |
| 2510009E07Rik  | - | + |
| 2610001J05Rik  | - | + |
| 2610002J02Rik  | - | + |
| 2610005L07Rik  | - | + |
| 2610015P09Rik  | - | + |
| 2610018G03Rik  | - | + |
| 2610019E17Rik  | - | + |
| 2610020C07Rik  | - | + |
| 2610020H08Rik  | - | + |
| 2610035D17Rik  | - | + |
| 2610044O15Rik8 | - | + |
| 2610204G22Rik  | - | + |
| 2610206C17Rik  | - | + |
| 2610301B20Rik  | - | + |
| 2610306M01Rik  | - | + |
| 2610318N02Rik  | - | + |
| 2610507I01Rik  | - | + |

|               |   |   |
|---------------|---|---|
| 2610524H06Rik | - | + |
| 2700029M09Rik | - | + |
| 2700038G22Rik | - | + |
| 2700049A03Rik | - | + |
| 2700050L05Rik | - | + |
| 2700081L22Rik | - | + |
| 2700094K13Rik | - | + |
| 2700097O09Rik | - | + |
| 2700099C18Rik | - | + |
| 2810001G20Rik | - | + |
| 2810002D19Rik | - | + |
| 2810004N23Rik | - | + |
| 2810006K23Rik | - | + |
| 2810013P06Rik | - | + |
| 2810021J22Rik | - | + |
| 2810403A07Rik | - | + |
| 2810403D21Rik | - | + |
| 2810407C02Rik | - | + |
| 2810408A11Rik | - | + |
| 2810408M09Rik | - | + |
| 2810417H13Rik | - | + |
| 2810429I04Rik | - | + |
| 2810442I21Rik | - | + |
| 2810474O19Rik | - | + |
| 2900002K06Rik | - | + |
| 2900009J06Rik | - | + |
| 2900056M20Rik | - | + |
| 2900060B14Rik | - | + |
| 3000002C10Rik | - | + |
| 3010026O09Rik | - | + |
| 3110001I22Rik | - | + |
| 3110002H16Rik | - | + |
| 3110009E18Rik | - | + |
| 3110040N11Rik | - | + |
| 3110043O21Rik | - | + |
| 3110045C21Rik | - | + |
| 3110056K07Rik | - | + |
| 3110057O12Rik | - | + |
| 3110062M04Rik | - | + |
| 3110070M22Rik | - | + |
| 3110082I17Rik | - | + |
| 3230401D17Rik | - | + |
| 3300002I08Rik | - | + |
| 3830408C21Rik | - | + |
| 4632415K11Rik | - | + |
| 4632428N05Rik | - | + |
| 4632434I11Rik | - | + |
| 4732416N19Rik | - | + |
| 4732491K20Rik | - | + |
| 4831440E17Rik | - | + |
| 4833417C18Rik | - | + |
| 4833418N02Rik | - | + |
| 4833420G17Rik | - | + |



|               |   |   |
|---------------|---|---|
| 4833439L19Rik | - | + |
| 4921504E06Rik | - | + |
| 4921524J17Rik | - | + |
| 4921531C22Rik | - | + |
| 4930405A21Rik | - | + |
| 4930413G21Rik | - | + |
| 4930414L22Rik | - | + |
| 4930422G04Rik | - | + |
| 4930426L09Rik | - | + |
| 4930427A07Rik | - | + |
| 4930429F24Rik | - | + |
| 4930432K21Rik | - | + |
| 4930432M17Rik | - | + |
| 4930441O14Rik | - | + |
| 4930444A02Rik | - | + |
| 4930451G09Rik | - | + |
| 4930451I11Rik | - | + |
| 4930455F23Rik | - | + |
| 4930473A02Rik | - | + |
| 4930481A15Rik | - | + |
| 4930483J18Rik | - | + |
| 4930502E09Rik | - | + |
| 4930503L19Rik | - | + |
| 4930506C21Rik | - | + |
| 4930507D05Rik | - | + |
| 4930509E16Rik | - | + |
| 4930512B01Rik | - | + |
| 4930513N10Rik | - | + |
| 4930515G01Rik | - | + |
| 4930523C07Rik | - | + |
| 4930524L23Rik | - | + |
| 4930525G20Rik | - | + |
| 4930528A17Rik | - | + |
| 4930539J05Rik | - | + |
| 4930544D05Rik | - | + |
| 4930549G23Rik | - | + |
| 4930555B11Rik | - | + |
| 4930558J18Rik | - | + |
| 4930563E22Rik | - | + |
| 4930577N17Rik | - | + |
| 4930578M01Rik | - | + |
| 4930579G24Rik | - | + |
| 4930583K01Rik | - | + |
| 4930593A02Rik | - | + |
| 4931406C07Rik | - | + |
| 4931414P19Rik | - | + |
| 4931428F04Rik | - | + |
| 4931440J10Rik | - | + |
| 4932412D23Rik | - | + |
| 4932415G12Rik | - | + |
| 4932416H05Rik | - | + |
| 4932438A13Rik | - | + |
| 4933404O12Rik | - | + |

|               |   |   |
|---------------|---|---|
| 4933405D12Rik | - | + |
| 4933405L10Rik | - | + |
| 4933406C10Rik | - | + |
| 4933406I18Rik | - | + |
| 4933407K13Rik | - | + |
| 4933408J17Rik | - | + |
| 4933411G11Rik | - | + |
| 4933412E12Rik | - | + |
| 4933417D19Rik | - | + |
| 4933421O10Rik | - | + |
| 4933426M11Rik | - | + |
| 4933427E11Rik | - | + |
| 4933433G15Rik | - | + |
| 4933434E20Rik | - | + |
| 4933439C10Rik | - | + |
| 5031414D18Rik | - | + |
| 5031425E22Rik | - | + |
| 5031439G07Rik | - | + |
| 5330426P16Rik | - | + |
| 5430402O13Rik | - | + |
| 5430405H02Rik | - | + |
| 5430416N02Rik | - | + |
| 5430427O19Rik | - | + |
| 5730405O15Rik | - | + |
| 5730408K05Rik | - | + |
| 5730422E09Rik | - | + |
| 5730455P16Rik | - | + |
| 5730488B01Rik | - | + |
| 5730577I03Rik | - | + |
| 5830415F09Rik | - | + |
| 5830416P10Rik | - | + |
| 5830418K08Rik | - | + |
| 5830428M24Rik | - | + |
| 5830432E09Rik | - | + |
| 5830454E08Rik | - | + |
| 6030458C11Rik | - | + |
| 6230400D17Rik | - | + |
| 6330408A02Rik | - | + |
| 6330416G13Rik | - | + |
| 6330418K02Rik | - | + |
| 6330549D23Rik | - | + |
| 6430550D23Rik | - | + |
| 6820431F20Rik | - | + |
| 8430410A17Rik | - | + |
| 8430419L09Rik | - | + |
| 8430429K09Rik | - | + |
| 9030624J02Rik | - | + |
| 9130011E15Rik | - | + |
| 9130019O22Rik | - | + |
| 9130023H24Rik | - | + |
| 9130401M01Rik | - | + |
| 9230110C19Rik | - | + |
| 9230114K14Rik | - | + |

|               |   |   |
|---------------|---|---|
| 9230116N13Rik | - | + |
| 9330020H09Rik | - | + |
| 9330133O14Rik | - | + |
| 9330151L19Rik | - | + |
| 9330175E14Rik | - | + |
| 9430015G10Rik | - | + |
| 9430016H08Rik | - | + |
| 9430023L20Rik | - | + |
| 9430083A17Rik | - | + |
| 9530068E07Rik | - | + |
| 9630033F20Rik | - | + |
| 9930014A18Rik | - | + |
| 9930021J03Rik | - | + |
| 9930104L06Rik | - | + |
| A130010J15Rik | - | + |
| A130049A11Rik | - | + |
| A230046K03Rik | - | + |
| A230056P14Rik | - | + |
| A230072C01Rik | - | + |
| A330035P11Rik | - | + |
| A330050B17Rik | - | + |
| A330069E16Rik | - | + |
| A430033K04Rik | - | + |
| A430035B10Rik | - | + |
| A430078G23Rik | - | + |
| A530054K11Rik | - | + |
| A530072M11Rik | - | + |
| A530088E08Rik | - | + |
| A630001G21Rik | - | + |
| A630020A06    | - | + |
| A630066F11Rik | - | + |
| A630072M18Rik | - | + |
| A630089N07Rik | - | + |
| A730017L22Rik | - | + |
| A830080D01Rik | - | + |
| A930005H10Rik | - | + |
| A930006K02Rik | - | + |
| A930007I19Rik | - | + |
| A930015D03Rik | - | + |
| A930016O22Rik | - | + |
| AA388235      | - | + |
| AA415398      | - | + |
| AA465934      | - | + |
| AA474331      | - | + |
| AA987161      | - | + |
| Aacs          | - | + |
| Aaed1         | - | + |
| Aagab         | - | + |
| Aak1          | - | + |
| Aamdc         | - | + |
| Aamp          | - | + |
| Aar2          | - | + |
| Aars          | - | + |

|                 |   |   |
|-----------------|---|---|
| <i>Aars2</i>    | - | + |
| <i>Aarsd1</i>   | - | + |
| <i>Aasdh</i>    | - | + |
| <i>Aasdhppt</i> | - | + |
| <i>AB124611</i> | - | + |
| <i>Abca2</i>    | - | + |
| <i>Abca7</i>    | - | + |
| <i>Abcb10</i>   | - | + |
| <i>Abcb1a</i>   | - | + |
| <i>Abcb1b</i>   | - | + |
| <i>Abcb4</i>    | - | + |
| <i>Abcb6</i>    | - | + |
| <i>Abcb7</i>    | - | + |
| <i>Abcb8</i>    | - | + |
| <i>Abcc1</i>    | - | + |
| <i>Abcc10</i>   | - | + |
| <i>Abcc4</i>    | - | + |
| <i>Abcd1</i>    | - | + |
| <i>Abcd3</i>    | - | + |
| <i>Abce1</i>    | - | + |
| <i>Abcf1</i>    | - | + |
| <i>Abcf2</i>    | - | + |
| <i>Abcf3</i>    | - | + |
| <i>Abcg3</i>    | - | + |
| <i>Abhd13</i>   | - | + |
| <i>Abhd2</i>    | - | + |
| <i>Abhd8</i>    | - | + |
| <i>Abi1</i>     | - | + |
| <i>Abi3</i>     | - | + |
| <i>Abl1</i>     | - | + |
| <i>Abl2</i>     | - | + |
| <i>Abracl</i>   | - | + |
| <i>Abt1</i>     | - | + |
| <i>Abtb1</i>    | - | + |
| <i>Acaa1a</i>   | - | + |
| <i>Acaa2</i>    | - | + |
| <i>Acad10</i>   | - | + |
| <i>Acad11</i>   | - | + |
| <i>Acad12</i>   | - | + |
| <i>Acad9</i>    | - | + |
| <i>Acadl</i>    | - | + |
| <i>Acadm</i>    | - | + |
| <i>Acads</i>    | - | + |
| <i>Acap1</i>    | - | + |
| <i>Acap2</i>    | - | + |
| <i>Acap3</i>    | - | + |
| <i>Acat1</i>    | - | + |
| <i>Acat2</i>    | - | + |
| <i>Acbd3</i>    | - | + |
| <i>Acbd5</i>    | - | + |
| <i>Acbd6</i>    | - | + |
| <i>Acd</i>      | - | + |
| <i>Acin1</i>    | - | + |

|                 |   |   |
|-----------------|---|---|
| <i>Acly</i>     | - | + |
| <i>Acn9</i>     | - | + |
| <i>Aco1</i>     | - | + |
| <i>Aco2</i>     | - | + |
| <i>Acot13</i>   | - | + |
| <i>Acot6</i>    | - | + |
| <i>Acot7</i>    | - | + |
| <i>Acot8</i>    | - | + |
| <i>Acot9</i>    | - | + |
| <i>Acox1</i>    | - | + |
| <i>Acp2</i>     | - | + |
| <i>Acp5</i>     | - | + |
| <i>Acp6</i>     | - | + |
| <i>Acsf2</i>    | - | + |
| <i>Acsf3</i>    | - | + |
| <i>Acs1</i>     | - | + |
| <i>Acs3</i>     | - | + |
| <i>Acs4</i>     | - | + |
| <i>Acss1</i>    | - | + |
| <i>Actb</i>     | - | + |
| <i>Actg1</i>    | - | + |
| <i>Actl6a</i>   | - | + |
| <i>Actn4</i>    | - | + |
| <i>Actr1a</i>   | - | + |
| <i>Actr1b</i>   | - | + |
| <i>Actr2</i>    | - | + |
| <i>Actr3</i>    | - | + |
| <i>Actr3b</i>   | - | + |
| <i>Actr8</i>    | - | + |
| <i>Acy1</i>     | - | + |
| <i>Acyp1</i>    | - | + |
| <i>Ada</i>      | - | + |
| <i>Adal</i>     | - | + |
| <i>Adam10</i>   | - | + |
| <i>Adam17</i>   | - | + |
| <i>Adam9</i>    | - | + |
| <i>Adamts10</i> | - | + |
| <i>Adap1</i>    | - | + |
| <i>Adat1</i>    | - | + |
| <i>Adat2</i>    | - | + |
| <i>Adck1</i>    | - | + |
| <i>Adck3</i>    | - | + |
| <i>Adck4</i>    | - | + |
| <i>Adcy3</i>    | - | + |
| <i>Add1</i>     | - | + |
| <i>Add3</i>     | - | + |
| <i>Adhfe1</i>   | - | + |
| <i>Adi1</i>     | - | + |
| <i>Adipor1</i>  | - | + |
| <i>Adk</i>      | - | + |
| <i>Adnp</i>     | - | + |
| <i>Ado</i>      | - | + |
| <i>Adprh</i>    | - | + |

|                 |   |   |
|-----------------|---|---|
| <i>Adprm</i>    | - | + |
| <i>Adrbk1</i>   | - | + |
| <i>Adrm1</i>    | - | + |
| <i>Adsl</i>     | - | + |
| <i>Adss</i>     | - | + |
| <i>Adssl1</i>   | - | + |
| <i>Aebp2</i>    | - | + |
| <i>Aen</i>      | - | + |
| <i>Aes</i>      | - | + |
| <i>AF357399</i> | - | + |
| <i>Aff3</i>     | - | + |
| <i>Aff4</i>     | - | + |
| <i>Afg3l1</i>   | - | + |
| <i>Afmid</i>    | - | + |
| <i>Aftph</i>    | - | + |
| <i>Aga</i>      | - | + |
| <i>Agap3</i>    | - | + |
| <i>Agbl3</i>    | - | + |
| <i>Agbl5</i>    | - | + |
| <i>Agfg1</i>    | - | + |
| <i>Agfg2</i>    | - | + |
| <i>Aggf1</i>    | - | + |
| <i>Agl</i>      | - | + |
| <i>Agpat1</i>   | - | + |
| <i>Agpat3</i>   | - | + |
| <i>Agpat4</i>   | - | + |
| <i>Agpat5</i>   | - | + |
| <i>Agps</i>     | - | + |
| <i>Agrp</i>     | - | + |
| <i>Agtbbp1</i>  | - | + |
| <i>Agtrap</i>   | - | + |
| <i>Agxt2l2</i>  | - | + |
| <i>Ahctf1</i>   | - | + |
| <i>Ahcy</i>     | - | + |
| <i>Ahi1</i>     | - | + |
| <i>Ahsa1</i>    | - | + |
| <i>AI314180</i> | - | + |
| <i>AI316807</i> | - | + |
| <i>AI413582</i> | - | + |
| <i>AI450353</i> | - | + |
| <i>AI462493</i> | - | + |
| <i>AI467606</i> | - | + |
| <i>AI480653</i> | - | + |
| <i>AI504432</i> | - | + |
| <i>AI506816</i> | - | + |
| <i>AI597468</i> | - | + |
| <i>AI597479</i> | - | + |
| <i>AI662270</i> | - | + |
| <i>AI987944</i> | - | + |
| <i>Aicda</i>    | - | + |
| <i>Aifm1</i>    | - | + |
| <i>Aifm2</i>    | - | + |
| <i>Aig1</i>     | - | + |

|                 |   |   |
|-----------------|---|---|
| <i>Aim2</i>     | - | + |
| <i>Aimp1</i>    | - | + |
| <i>Aimp2</i>    | - | + |
| <i>Aip</i>      | - | + |
| <i>AK010878</i> | - | + |
| <i>Ak2</i>      | - | + |
| <i>Ak3</i>      | - | + |
| <i>Akap10</i>   | - | + |
| <i>Akap11</i>   | - | + |
| <i>Akap12</i>   | - | + |
| <i>Akap13</i>   | - | + |
| <i>Akap17b</i>  | - | + |
| <i>Akap5</i>    | - | + |
| <i>Akap8</i>    | - | + |
| <i>Akap8l</i>   | - | + |
| <i>Akap9</i>    | - | + |
| <i>Akna</i>     | - | + |
| <i>Akr1a1</i>   | - | + |
| <i>Akr1b10</i>  | - | + |
| <i>Akr1b3</i>   | - | + |
| <i>Akr1e1</i>   | - | + |
| <i>Akr7a5</i>   | - | + |
| <i>Akt1s1</i>   | - | + |
| <i>Akt2</i>     | - | + |
| <i>Aktip</i>    | - | + |
| <i>Alad</i>     | - | + |
| <i>Alas1</i>    | - | + |
| <i>Aldh16a1</i> | - | + |
| <i>Aldh18a1</i> | - | + |
| <i>Aldh2</i>    | - | + |
| <i>Aldh3b1</i>  | - | + |
| <i>Aldh7a1</i>  | - | + |
| <i>Aldh9a1</i>  | - | + |
| <i>Aldoa</i>    | - | + |
| <i>Alg1</i>     | - | + |
| <i>Alg10b</i>   | - | + |
| <i>Alg12</i>    | - | + |
| <i>Alg13</i>    | - | + |
| <i>Alg14</i>    | - | + |
| <i>Alg2</i>     | - | + |
| <i>Alg3</i>     | - | + |
| <i>Alg5</i>     | - | + |
| <i>Alg8</i>     | - | + |
| <i>Alg9</i>     | - | + |
| <i>Alkbh1</i>   | - | + |
| <i>Alkbh2</i>   | - | + |
| <i>Alkbh3</i>   | - | + |
| <i>Alkbh6</i>   | - | + |
| <i>Alkbh7</i>   | - | + |
| <i>Alkbh8</i>   | - | + |
| <i>Alpk1</i>    | - | + |
| <i>Als2</i>     | - | + |
| <i>Alyref</i>   | - | + |

|                 |   |   |
|-----------------|---|---|
| <i>Alyref2</i>  | - | + |
| <i>Amacr</i>    | - | + |
| <i>Amdhd2</i>   | - | + |
| <i>Amer1</i>    | - | + |
| <i>Amfr</i>     | - | + |
| <i>Ammecr11</i> | - | + |
| <i>Amn1</i>     | - | + |
| <i>Ampd2</i>    | - | + |
| <i>Amz2</i>     | - | + |
| <i>Anapc1</i>   | - | + |
| <i>Anapc10</i>  | - | + |
| <i>Anapc11</i>  | - | + |
| <i>Anapc13</i>  | - | + |
| <i>Anapc16</i>  | - | + |
| <i>Anapc2</i>   | - | + |
| <i>Anapc4</i>   | - | + |
| <i>Anapc5</i>   | - | + |
| <i>Anapc7</i>   | - | + |
| <i>Ang</i>      | - | + |
| <i>Angptl6</i>  | - | + |
| <i>Ankfy1</i>   | - | + |
| <i>Ankhd1</i>   | - | + |
| <i>Ankib1</i>   | - | + |
| <i>Ankle1</i>   | - | + |
| <i>Ankle2</i>   | - | + |
| <i>Ankmy2</i>   | - | + |
| <i>Ankra2</i>   | - | + |
| <i>Ankrd10</i>  | - | + |
| <i>Ankrd11</i>  | - | + |
| <i>Ankrd12</i>  | - | + |
| <i>Ankrd13a</i> | - | + |
| <i>Ankrd13d</i> | - | + |
| <i>Ankrd16</i>  | - | + |
| <i>Ankrd17</i>  | - | + |
| <i>Ankrd26</i>  | - | + |
| <i>Ankrd28</i>  | - | + |
| <i>Ankrd32</i>  | - | + |
| <i>Ankrd37</i>  | - | + |
| <i>Ankrd39</i>  | - | + |
| <i>Ankrd40</i>  | - | + |
| <i>Ankrd44</i>  | - | + |
| <i>Ankrd46</i>  | - | + |
| <i>Ankrd49</i>  | - | + |
| <i>Ankrd52</i>  | - | + |
| <i>Ankrd54</i>  | - | + |
| <i>Ankrd9</i>   | - | + |
| <i>Anks1</i>    | - | + |
| <i>Anks3</i>    | - | + |
| <i>Ankzf1</i>   | - | + |
| <i>Anln</i>     | - | + |
| <i>Ano6</i>     | - | + |
| <i>Ano8</i>     | - | + |
| <i>Anp32b</i>   | - | + |



|                |   |   |
|----------------|---|---|
| <i>Anp32e</i>  | - | + |
| <i>Antxr2</i>  | - | + |
| <i>Anxa11</i>  | - | + |
| <i>Anxa2</i>   | - | + |
| <i>Anxa6</i>   | - | + |
| <i>Anxa7</i>   | - | + |
| <i>Ap1m1</i>   | - | + |
| <i>Ap1s2</i>   | - | + |
| <i>Ap2a2</i>   | - | + |
| <i>Ap2b1</i>   | - | + |
| <i>Ap2m1</i>   | - | + |
| <i>Ap2s1</i>   | - | + |
| <i>Ap3b1</i>   | - | + |
| <i>Ap3d1</i>   | - | + |
| <i>Ap3m1</i>   | - | + |
| <i>Ap3s2</i>   | - | + |
| <i>Ap4b1</i>   | - | + |
| <i>Ap4m1</i>   | - | + |
| <i>Ap4s1</i>   | - | + |
| <i>Ap5m1</i>   | - | + |
| <i>Ap5s1</i>   | - | + |
| <i>Ap5z1</i>   | - | + |
| <i>Apaf1</i>   | - | + |
| <i>Apba3</i>   | - | + |
| <i>Apbb1ip</i> | - | + |
| <i>Apbb3</i>   | - | + |
| <i>Apc</i>     | - | + |
| <i>Apeh</i>    | - | + |
| <i>Apex1</i>   | - | + |
| <i>Apex2</i>   | - | + |
| <i>Aph1a</i>   | - | + |
| <i>Api5</i>    | - | + |
| <i>Apip</i>    | - | + |
| <i>Apitd1</i>  | - | + |
| <i>Apif</i>    | - | + |
| <i>Apmap</i>   | - | + |
| <i>Apobec1</i> | - | + |
| <i>Apobec3</i> | - | + |
| <i>Apobr</i>   | - | + |
| <i>Apoe</i>    | - | + |
| <i>Apool</i>   | - | + |
| <i>Apopt1</i>  | - | + |
| <i>Appbp2</i>  | - | + |
| <i>Appl2</i>   | - | + |
| <i>Aprt</i>    | - | + |
| <i>Aptx</i>    | - | + |
| <i>Aqr</i>     | - | + |
| <i>Araf</i>    | - | + |
| <i>Arap1</i>   | - | + |
| <i>Arap2</i>   | - | + |
| <i>Arcn1</i>   | - | + |
| <i>Arf1</i>    | - | + |
| <i>Arf4</i>    | - | + |

|                  |   |   |
|------------------|---|---|
| <i>Arf5</i>      | - | + |
| <i>Arf6</i>      | - | + |
| <i>Arfgap1</i>   | - | + |
| <i>Arfgap3</i>   | - | + |
| <i>Arhgef1</i>   | - | + |
| <i>Arhgef2</i>   | - | + |
| <i>Arfip2</i>    | - | + |
| <i>Arfrp1</i>    | - | + |
| <i>Arglu1</i>    | - | + |
| <i>Arhgap1</i>   | - | + |
| <i>Arhgap11a</i> | - | + |
| <i>Arhgap12</i>  | - | + |
| <i>Arhgap15</i>  | - | + |
| <i>Arhgap18</i>  | - | + |
| <i>Arhgap19</i>  | - | + |
| <i>Arhgap24</i>  | - | + |
| <i>Arhgap25</i>  | - | + |
| <i>Arhgap27</i>  | - | + |
| <i>Arhgap30</i>  | - | + |
| <i>Arhgap33</i>  | - | + |
| <i>Arhgap4</i>   | - | + |
| <i>Arhgap9</i>   | - | + |
| <i>Arhgdia</i>   | - | + |
| <i>Arhgdib</i>   | - | + |
| <i>Arhgef1</i>   | - | + |
| <i>Arhgef2</i>   | - | + |
| <i>Arhgef4</i>   | - | + |
| <i>Arhgef6</i>   | - | + |
| <i>Arid1a</i>    | - | + |
| <i>Arid1b</i>    | - | + |
| <i>Arid2</i>     | - | + |
| <i>Arid3b</i>    | - | + |
| <i>Arid4a</i>    | - | + |
| <i>Arid4b</i>    | - | + |
| <i>Arid5b</i>    | - | + |
| <i>Arl14ep</i>   | - | + |
| <i>Arl15</i>     | - | + |
| <i>Arl16</i>     | - | + |
| <i>Arl2</i>      | - | + |
| <i>Arl2bp</i>    | - | + |
| <i>Arl3</i>      | - | + |
| <i>Arl4a</i>     | - | + |
| <i>Arl4d</i>     | - | + |
| <i>Arl5a</i>     | - | + |
| <i>Arl5b</i>     | - | + |
| <i>Arl5c</i>     | - | + |
| <i>Arl6ip1</i>   | - | + |
| <i>Arl6ip4</i>   | - | + |
| <i>Arl6ip5</i>   | - | + |
| <i>Arl6ip6</i>   | - | + |
| <i>Arl8a</i>     | - | + |
| <i>Arl8b</i>     | - | + |
| <i>Armc1</i>     | - | + |

|               |   |   |
|---------------|---|---|
| <i>Armc5</i>  | - | + |
| <i>Armc6</i>  | - | + |
| <i>Armc7</i>  | - | + |
| <i>Armc9</i>  | - | + |
| <i>Armcx3</i> | - | + |
| <i>Armcx5</i> | - | + |
| <i>Armcx6</i> | - | + |
| <i>Arnt</i>   | - | + |
| <i>Arpc1a</i> | - | + |
| <i>Arpc1b</i> | - | + |
| <i>Arpc2</i>  | - | + |
| <i>Arpc3</i>  | - | + |
| <i>Arpc4</i>  | - | + |
| <i>Arpc5l</i> | - | + |
| <i>Arpp19</i> | - | + |
| <i>Arrb2</i>  | - | + |
| <i>Arrdc2</i> | - | + |
| <i>Arrdc3</i> | - | + |
| <i>Arsb</i>   | - | + |
| <i>Arsg</i>   | - | + |
| <i>Arsk</i>   | - | + |
| <i>Arv1</i>   | - | + |
| <i>As3mt</i>  | - | + |
| <i>Asah1</i>  | - | + |
| <i>Asb1</i>   | - | + |
| <i>Asb15</i>  | - | + |
| <i>Asb3</i>   | - | + |
| <i>Asb6</i>   | - | + |
| <i>Asb7</i>   | - | + |
| <i>Ascc1</i>  | - | + |
| <i>Asf1a</i>  | - | + |
| <i>Asf1b</i>  | - | + |
| <i>Ash2l</i>  | - | + |
| <i>Asna1</i>  | - | + |
| <i>Asnsd1</i> | - | + |
| <i>Aspm</i>   | - | + |
| <i>Asrgl1</i> | - | + |
| <i>Ass1</i>   | - | + |
| <i>Astl</i>   | - | + |
| <i>Asun</i>   | - | + |
| <i>Asxl1</i>  | - | + |
| <i>Asxl2</i>  | - | + |
| <i>Atad1</i>  | - | + |
| <i>Atad2</i>  | - | + |
| <i>Atad3a</i> | - | + |
| <i>Atad5</i>  | - | + |
| <i>Atat1</i>  | - | + |
| <i>Ate1</i>   | - | + |
| <i>Atf1</i>   | - | + |
| <i>Atf2</i>   | - | + |
| <i>Atf4</i>   | - | + |
| <i>Atf5</i>   | - | + |
| <i>Atf7</i>   | - | + |

|                    |   |   |
|--------------------|---|---|
| <i>Atf7ip</i>      | - | + |
| <i>Atg10</i>       | - | + |
| <i>Atg13</i>       | - | + |
| <i>Atg16l2</i>     | - | + |
| <i>Atg2a</i>       | - | + |
| <i>Atg2b</i>       | - | + |
| <i>Atg3</i>        | - | + |
| <i>Atg4a</i>       | - | + |
| <i>Atg4b</i>       | - | + |
| <i>Atg4d</i>       | - | + |
| <i>Atg5</i>        | - | + |
| <i>Atg9a</i>       | - | + |
| <i>Atic</i>        | - | + |
| <i>Ati1</i>        | - | + |
| <i>Ati3</i>        | - | + |
| <i>Atm</i>         | - | + |
| <i>Atmin</i>       | - | + |
| <i>Atn1</i>        | - | + |
| <i>Atox1</i>       | - | + |
| <i>Atp10d</i>      | - | + |
| <i>Atp11a</i>      | - | + |
| <i>Atp11b</i>      | - | + |
| <i>Atp13a1</i>     | - | + |
| <i>Atp13a2</i>     | - | + |
| <i>Atp13a3</i>     | - | + |
| <i>Atp1b3</i>      | - | + |
| <i>Atp2a2</i>      | - | + |
| <i>Atp2a3</i>      | - | + |
| <i>Atp5a1</i>      | - | + |
| <i>Atp5b</i>       | - | + |
| <i>Atp5c1</i>      | - | + |
| <i>Atp5e</i>       | - | + |
| <i>Atp5f1</i>      | - | + |
| <i>Atp5h</i>       | - | + |
| <i>Atp5j</i>       | - | + |
| <i>Atp5j2</i>      | - | + |
| <i>Atp5k</i>       | - | + |
| <i>Atp5l</i>       | - | + |
| <i>Atp5o</i>       | - | + |
| <i>Atp5s</i>       | - | + |
| <i>Atp5sl</i>      | - | + |
| <i>Atp6ap1</i>     | - | + |
| <i>Atp6ap2</i>     | - | + |
| <i>Atp6v0a2</i>    | - | + |
| <i>Atp6v0c</i>     | - | + |
| <i>Atp6v0c-ps2</i> | - | + |
| <i>Atp6v0d1</i>    | - | + |
| <i>Atp6v1a</i>     | - | + |
| <i>Atp6v1d</i>     | - | + |
| <i>Atp6v1f</i>     | - | + |
| <i>Atp6v1g1</i>    | - | + |
| <i>Atp6v1g2</i>    | - | + |
| <i>Atp6v1h</i>     | - | + |

|                      |   |   |
|----------------------|---|---|
| <i>Atp7a</i>         | - | + |
| <i>Atp8a1</i>        | - | + |
| <i>Atp8b2</i>        | - | + |
| <i>Atp9b</i>         | - | + |
| <i>Atpaf1</i>        | - | + |
| <i>Atpaf2</i>        | - | + |
| <i>Atpbd4</i>        | - | + |
| <i>Atpif1</i>        | - | + |
| <i>Atr</i>           | - | + |
| <i>Atraid</i>        | - | + |
| <i>Atrip</i>         | - | + |
| <i>Atrn</i>          | - | + |
| <i>Atrx</i>          | - | + |
| <i>Atxn10</i>        | - | + |
| <i>Atxn11</i>        | - | + |
| <i>Atxn2</i>         | - | + |
| <i>Atxn2l</i>        | - | + |
| <i>Atxn3</i>         | - | + |
| <i>Atxn711</i>       | - | + |
| <i>Atxn713</i>       | - | + |
| <i>Atxn713b</i>      | - | + |
| <i>AU019823</i>      | - | + |
| <i>AU040320</i>      | - | + |
| <i>AU041133</i>      | - | + |
| <i>Auh</i>           | - | + |
| <i>Aup1</i>          | - | + |
| <i>Aurka</i>         | - | + |
| <i>Aurkaip1</i>      | - | + |
| <i>Aurkb</i>         | - | + |
| <i>AV051173</i>      | - | + |
| <i>Avpi1</i>         | - | + |
| <i>AW046200</i>      | - | + |
| <i>AW112010</i>      | - | + |
| <i>AW146154</i>      | - | + |
| <i>AW209491</i>      | - | + |
| <i>AW549877</i>      | - | + |
| <i>AW554918</i>      | - | + |
| <i>Axin1</i>         | - | + |
| <i>Azi1</i>          | - | + |
| <i>Azi2</i>          | - | + |
| <i>Azin1</i>         | - | + |
| <i>B130034C11Rik</i> | - | + |
| <i>B230120H23Rik</i> | - | + |
| <i>B230208H11Rik</i> | - | + |
| <i>B230217C12Rik</i> | - | + |
| <i>B230217O12Rik</i> | - | + |
| <i>B230219D22Rik</i> | - | + |
| <i>B2m</i>           | - | + |
| <i>B330016D10Rik</i> | - | + |
| <i>B3galnt2</i>      | - | + |
| <i>B3galt4</i>       | - | + |
| <i>B3galt6</i>       | - | + |
| <i>B3gat3</i>        | - | + |

|                      |   |   |
|----------------------|---|---|
| <i>B3gnt2</i>        | - | + |
| <i>B3gnt3</i>        | - | + |
| <i>B3gnt8</i>        | - | + |
| <i>B3gnt9</i>        | - | + |
| <i>B3gnt11</i>       | - | + |
| <i>B4galnt1</i>      | - | + |
| <i>B4galt1</i>       | - | + |
| <i>B4galt3</i>       | - | + |
| <i>B4galt5</i>       | - | + |
| <i>B4galt7</i>       | - | + |
| <i>B630005N14Rik</i> | - | + |
| <i>B930003M22Rik</i> | - | + |
| <i>B930059L03Rik</i> | - | + |
| <i>B9d1</i>          | - | + |
| <i>Baat1</i>         | - | + |
| <i>Babam1</i>        | - | + |
| <i>Bad</i>           | - | + |
| <i>Bag1</i>          | - | + |
| <i>Bag2</i>          | - | + |
| <i>Bag4</i>          | - | + |
| <i>Bag5</i>          | - | + |
| <i>Bag6</i>          | - | + |
| <i>Bak1</i>          | - | + |
| <i>Banf1</i>         | - | + |
| <i>Bank1</i>         | - | + |
| <i>Banp</i>          | - | + |
| <i>Bap1</i>          | - | + |
| <i>Bard1</i>         | - | + |
| <i>Basp1</i>         | - | + |
| <i>Batf</i>          | - | + |
| <i>Bax</i>           | - | + |
| <i>Baz1a</i>         | - | + |
| <i>Baz1b</i>         | - | + |
| <i>Baz2a</i>         | - | + |
| <i>Baz2b</i>         | - | + |
| <i>BB557941</i>      | - | + |
| <i>Bbip1</i>         | - | + |
| <i>Bbs1</i>          | - | + |
| <i>Bbs10</i>         | - | + |
| <i>Bbs12</i>         | - | + |
| <i>Bbs4</i>          | - | + |
| <i>Bbs9</i>          | - | + |
| <i>BC002163</i>      | - | + |
| <i>BC003331</i>      | - | + |
| <i>BC003965</i>      | - | + |
| <i>BC004004</i>      | - | + |
| <i>BC005537</i>      | - | + |
| <i>BC005624</i>      | - | + |
| <i>BC017643</i>      | - | + |
| <i>BC018507</i>      | - | + |
| <i>BC020402</i>      | - | + |
| <i>BC023829</i>      | - | + |
| <i>BC024978</i>      | - | + |

|                 |   |   |
|-----------------|---|---|
| <i>BC025920</i> | - | + |
| <i>BC026590</i> | - | + |
| <i>BC027231</i> | - | + |
| <i>BC028528</i> | - | + |
| <i>BC029214</i> | - | + |
| <i>BC029722</i> | - | + |
| <i>BC030307</i> | - | + |
| <i>BC030336</i> | - | + |
| <i>BC031181</i> | - | + |
| <i>BC031361</i> | - | + |
| <i>BC035044</i> | - | + |
| <i>BC037034</i> | - | + |
| <i>BC037704</i> | - | + |
| <i>BC048403</i> | - | + |
| <i>BC048644</i> | - | + |
| <i>BC049715</i> | - | + |
| <i>BC051142</i> | - | + |
| <i>BC051226</i> | - | + |
| <i>BC052040</i> | - | + |
| <i>BC053749</i> | - | + |
| <i>BC055324</i> | - | + |
| <i>BC056474</i> | - | + |
| <i>BC065397</i> | - | + |
| <i>BC090627</i> | - | + |
| <i>Bcap29</i>   | - | + |
| <i>Bcap31</i>   | - | + |
| <i>Bcar3</i>    | - | + |
| <i>Bcas2</i>    | - | + |
| <i>Bcas3</i>    | - | + |
| <i>Bcat1</i>    | - | + |
| <i>Bcat2</i>    | - | + |
| <i>Bccip</i>    | - | + |
| <i>Bckdha</i>   | - | + |
| <i>Bcl10</i>    | - | + |
| <i>Bcl2l1</i>   | - | + |
| <i>Bcl2l12</i>  | - | + |
| <i>Bcl3</i>     | - | + |
| <i>Bcl6</i>     | - | + |
| <i>Bcl7a</i>    | - | + |
| <i>Bcl7b</i>    | - | + |
| <i>Bcl9</i>     | - | + |
| <i>Bclaf1</i>   | - | + |
| <i>Bcs1l</i>    | - | + |
| <i>Bend5</i>    | - | + |
| <i>Bet1</i>     | - | + |
| <i>Bet1l</i>    | - | + |
| <i>Bfar</i>     | - | + |
| <i>Bhlhb9</i>   | - | + |
| <i>Bicd2</i>    | - | + |
| <i>Bid</i>      | - | + |
| <i>Bin2</i>     | - | + |
| <i>Bin3</i>     | - | + |
| <i>Birc2</i>    | - | + |

|                |   |   |
|----------------|---|---|
| <i>Birc3</i>   | - | + |
| <i>Birc5</i>   | - | + |
| <i>Birc6</i>   | - | + |
| <i>Blk</i>     | - | + |
| <i>Blnk</i>    | - | + |
| <i>Bloc1s3</i> | - | + |
| <i>Bloc1s4</i> | - | + |
| <i>Bloc1s5</i> | - | + |
| <i>Blvra</i>   | - | + |
| <i>Blzf1</i>   | - | + |
| <i>Bmf</i>     | - | + |
| <i>Bmp2k</i>   | - | + |
| <i>Bms1</i>    | - | + |
| <i>Bmyc</i>    | - | + |
| <i>Bnip1</i>   | - | + |
| <i>Bnip3</i>   | - | + |
| <i>Bod1</i>    | - | + |
| <i>Bod1l</i>   | - | + |
| <i>Bola1</i>   | - | + |
| <i>Bola2</i>   | - | + |
| <i>Bola3</i>   | - | + |
| <i>Bop1</i>    | - | + |
| <i>Bora</i>    | - | + |
| <i>Bphl</i>    | - | + |
| <i>Bpnt1</i>   | - | + |
| <i>Bptf</i>    | - | + |
| <i>Braf</i>    | - | + |
| <i>Brap</i>    | - | + |
| <i>Brat1</i>   | - | + |
| <i>Brca1</i>   | - | + |
| <i>Brca2</i>   | - | + |
| <i>Brcc3</i>   | - | + |
| <i>Brd1</i>    | - | + |
| <i>Brd2</i>    | - | + |
| <i>Brd3</i>    | - | + |
| <i>Brd4</i>    | - | + |
| <i>Brd7</i>    | - | + |
| <i>Brd8</i>    | - | + |
| <i>Brd9</i>    | - | + |
| <i>Bre</i>     | - | + |
| <i>Brf1</i>    | - | + |
| <i>Brf2</i>    | - | + |
| <i>Bri3</i>    | - | + |
| <i>Bri3bp</i>  | - | + |
| <i>Brip1</i>   | - | + |
| <i>Brix1</i>   | - | + |
| <i>Brk1</i>    | - | + |
| <i>Brms1l</i>  | - | + |
| <i>Brpf1</i>   | - | + |
| <i>Brpf3</i>   | - | + |
| <i>Brwd1</i>   | - | + |
| <i>Brwd3</i>   | - | + |
| <i>Bscl2</i>   | - | + |



|                      |   |   |
|----------------------|---|---|
| <i>Bsdc1</i>         | - | + |
| <i>Bsg</i>           | - | + |
| <i>Bspry</i>         | - | + |
| <i>Bst2</i>          | - | + |
| <i>Btaf1</i>         | - | + |
| <i>Btbd1</i>         | - | + |
| <i>Btbd10</i>        | - | + |
| <i>Btbd2</i>         | - | + |
| <i>Btbd6</i>         | - | + |
| <i>Btbd9</i>         | - | + |
| <i>Btd</i>           | - | + |
| <i>Btf3</i>          | - | + |
| <i>Btf3l4</i>        | - | + |
| <i>Btg1</i>          | - | + |
| <i>Btg2</i>          | - | + |
| <i>Btg3</i>          | - | + |
| <i>Btk</i>           | - | + |
| <i>Btla</i>          | - | + |
| <i>Bub1b</i>         | - | + |
| <i>Bud13</i>         | - | + |
| <i>Bud31</i>         | - | + |
| <i>Bysl</i>          | - | + |
| <i>Bzw1</i>          | - | + |
| <i>Bzw2</i>          | - | + |
| <i>C030016D13Rik</i> | - | + |
| <i>C030037D09Rik</i> | - | + |
| <i>C030046E11Rik</i> | - | + |
| <i>C130036L24Rik</i> | - | + |
| <i>C130060C02Rik</i> | - | + |
| <i>C1d</i>           | - | + |
| <i>C1galt1</i>       | - | + |
| <i>C1galt1c1</i>     | - | + |
| <i>C1qbp</i>         | - | + |
| <i>C230035I16Rik</i> | - | + |
| <i>C230052I12Rik</i> | - | + |
| <i>C230081A13Rik</i> | - | + |
| <i>C2cd2l</i>        | - | + |
| <i>C2cd3</i>         | - | + |
| <i>C330006A16Rik</i> | - | + |
| <i>C330007P06Rik</i> | - | + |
| <i>C330013E15Rik</i> | - | + |
| <i>C330018D20Rik</i> | - | + |
| <i>C330027C09Rik</i> | - | + |
| <i>C530005A16Rik</i> | - | + |
| <i>C78339</i>        | - | + |
| <i>C87436</i>        | - | + |
| <i>C8g</i>           | - | + |
| <i>C920006O11Rik</i> | - | + |
| <i>C920009B18Rik</i> | - | + |
| <i>C920021L13Rik</i> | - | + |
| <i>C920025E04Rik</i> | - | + |
| <i>Caap1</i>         | - | + |
| <i>Cab39l</i>        | - | + |

|                 |   |   |
|-----------------|---|---|
| <i>Cabin1</i>   | - | + |
| <i>Cabyr</i>    | - | + |
| <i>Cacfd1</i>   | - | + |
| <i>Cactin</i>   | - | + |
| <i>Cacul1</i>   | - | + |
| <i>Cacybp</i>   | - | + |
| <i>Cad</i>      | - | + |
| <i>Cage1</i>    | - | + |
| <i>Calcoco1</i> | - | + |
| <i>Calcr1</i>   | - | + |
| <i>Calhm2</i>   | - | + |
| <i>Calm3</i>    | - | + |
| <i>Calr</i>     | - | + |
| <i>Camk1d</i>   | - | + |
| <i>Camk2d</i>   | - | + |
| <i>Camk2g</i>   | - | + |
| <i>Camkk2</i>   | - | + |
| <i>Camkmt</i>   | - | + |
| <i>Caml</i>     | - | + |
| <i>Cand1</i>    | - | + |
| <i>Cand2</i>    | - | + |
| <i>Cant1</i>    | - | + |
| <i>Canx</i>     | - | + |
| <i>Cap1</i>     | - | + |
| <i>Capg</i>     | - | + |
| <i>Capn1</i>    | - | + |
| <i>Capn10</i>   | - | + |
| <i>Capn2</i>    | - | + |
| <i>Capn5</i>    | - | + |
| <i>Capns1</i>   | - | + |
| <i>Caprin1</i>  | - | + |
| <i>Capza1</i>   | - | + |
| <i>Capza2</i>   | - | + |
| <i>Capzb</i>    | - | + |
| <i>Car13</i>    | - | + |
| <i>Card11</i>   | - | + |
| <i>Card6</i>    | - | + |
| <i>Carm1</i>    | - | + |
| <i>Cars</i>     | - | + |
| <i>Cars2</i>    | - | + |
| <i>Casc3</i>    | - | + |
| <i>Casc5</i>    | - | + |
| <i>Casd1</i>    | - | + |
| <i>Caskin2</i>  | - | + |
| <i>Casp1</i>    | - | + |
| <i>Casp3</i>    | - | + |
| <i>Casp4</i>    | - | + |
| <i>Casp6</i>    | - | + |
| <i>Casp8</i>    | - | + |
| <i>Casp8ap2</i> | - | + |
| <i>Casp9</i>    | - | + |
| <i>Cast</i>     | - | + |
| <i>Cat</i>      | - | + |

|                 |   |   |
|-----------------|---|---|
| <i>Catsper2</i> | - | + |
| <i>Catsperd</i> | - | + |
| <i>Cbfa2t2</i>  | - | + |
| <i>Cbfa2t3</i>  | - | + |
| <i>Cbfb</i>     | - | + |
| <i>Cbl</i>      | - | + |
| <i>Cbr4</i>     | - | + |
| <i>Cbwd1</i>    | - | + |
| <i>Cbx3</i>     | - | + |
| <i>Cbx5</i>     | - | + |
| <i>Cby1</i>     | - | + |
| <i>Cc2d1a</i>   | - | + |
| <i>Cc2d1b</i>   | - | + |
| <i>Ccar1</i>    | - | + |
| <i>Ccb1l</i>    | - | + |
| <i>Ccdc101</i>  | - | + |
| <i>Ccdc104</i>  | - | + |
| <i>Ccdc107</i>  | - | + |
| <i>Ccdc111</i>  | - | + |
| <i>Ccdc115</i>  | - | + |
| <i>Ccdc117</i>  | - | + |
| <i>Ccdc12</i>   | - | + |
| <i>Ccdc122</i>  | - | + |
| <i>Ccdc124</i>  | - | + |
| <i>Ccdc125</i>  | - | + |
| <i>Ccdc127</i>  | - | + |
| <i>Ccdc130</i>  | - | + |
| <i>Ccdc134</i>  | - | + |
| <i>Ccdc137</i>  | - | + |
| <i>Ccdc138</i>  | - | + |
| <i>Ccdc14</i>   | - | + |
| <i>Ccdc146</i>  | - | + |
| <i>Ccdc150</i>  | - | + |
| <i>Ccdc155</i>  | - | + |
| <i>Ccdc157</i>  | - | + |
| <i>Ccdc163</i>  | - | + |
| <i>Ccdc167</i>  | - | + |
| <i>Ccdc17</i>   | - | + |
| <i>Ccdc171</i>  | - | + |
| <i>Ccdc173</i>  | - | + |
| <i>Ccdc176</i>  | - | + |
| <i>Ccdc18</i>   | - | + |
| <i>Ccdc25</i>   | - | + |
| <i>Ccdc28a</i>  | - | + |
| <i>Ccdc28b</i>  | - | + |
| <i>Ccdc41</i>   | - | + |
| <i>Ccdc43</i>   | - | + |
| <i>Ccdc47</i>   | - | + |
| <i>Ccdc50</i>   | - | + |
| <i>Ccdc51</i>   | - | + |
| <i>Ccdc53</i>   | - | + |
| <i>Ccdc57</i>   | - | + |
| <i>Ccdc58</i>   | - | + |

|                |   |   |
|----------------|---|---|
| <i>Ccdc59</i>  | - | + |
| <i>Ccdc6</i>   | - | + |
| <i>Ccdc62</i>  | - | + |
| <i>Ccdc66</i>  | - | + |
| <i>Ccdc69</i>  | - | + |
| <i>Ccdc71</i>  | - | + |
| <i>Ccdc71l</i> | - | + |
| <i>Ccdc77</i>  | - | + |
| <i>Ccdc78</i>  | - | + |
| <i>Ccdc79</i>  | - | + |
| <i>Ccdc80</i>  | - | + |
| <i>Ccdc84</i>  | - | + |
| <i>Ccdc85b</i> | - | + |
| <i>Ccdc88b</i> | - | + |
| <i>Ccdc88c</i> | - | + |
| <i>Ccdc9</i>   | - | + |
| <i>Ccdc90a</i> | - | + |
| <i>Ccdc90b</i> | - | + |
| <i>Ccdc91</i>  | - | + |
| <i>Ccdc93</i>  | - | + |
| <i>Ccdc94</i>  | - | + |
| <i>Ccdc97</i>  | - | + |
| <i>Cchr1</i>   | - | + |
| <i>Ccl25</i>   | - | + |
| <i>Ccm2</i>    | - | + |
| <i>Ccnb1</i>   | - | + |
| <i>Ccnb2</i>   | - | + |
| <i>Ccnc</i>    | - | + |
| <i>Ccnd3</i>   | - | + |
| <i>Ccndbp1</i> | - | + |
| <i>Ccne1</i>   | - | + |
| <i>Ccne2</i>   | - | + |
| <i>Ccng2</i>   | - | + |
| <i>Ccnh</i>    | - | + |
| <i>Ccni</i>    | - | + |
| <i>Ccnk</i>    | - | + |
| <i>Ccnl1</i>   | - | + |
| <i>Ccnl2</i>   | - | + |
| <i>Ccnt1</i>   | - | + |
| <i>Ccnt2</i>   | - | + |
| <i>Ccny</i>    | - | + |
| <i>Ccr12</i>   | - | + |
| <i>Ccser2</i>  | - | + |
| <i>Cct2</i>    | - | + |
| <i>Cct3</i>    | - | + |
| <i>Cct4</i>    | - | + |
| <i>Cct5</i>    | - | + |
| <i>Cct6a</i>   | - | + |
| <i>Cct7</i>    | - | + |
| <i>Cct8</i>    | - | + |
| <i>Ccz1</i>    | - | + |
| <i>Cd164</i>   | - | + |
| <i>Cd180</i>   | - | + |

|                 |   |   |
|-----------------|---|---|
| <i>Cd19</i>     | - | + |
| <i>Cd2</i>      | - | + |
| <i>Cd200</i>    | - | + |
| <i>Cd200r1</i>  | - | + |
| <i>Cd22</i>     | - | + |
| <i>Cd24a</i>    | - | + |
| <i>Cd274</i>    | - | + |
| <i>Cd2ap</i>    | - | + |
| <i>Cd2bp2</i>   | - | + |
| <i>Cd320</i>    | - | + |
| <i>Cd37</i>     | - | + |
| <i>Cd38</i>     | - | + |
| <i>Cd40</i>     | - | + |
| <i>Cd44</i>     | - | + |
| <i>Cd46</i>     | - | + |
| <i>Cd47</i>     | - | + |
| <i>Cd48</i>     | - | + |
| <i>Cd52</i>     | - | + |
| <i>Cd53</i>     | - | + |
| <i>Cd55</i>     | - | + |
| <i>Cd68</i>     | - | + |
| <i>Cd69</i>     | - | + |
| <i>Cd72</i>     | - | + |
| <i>Cd74</i>     | - | + |
| <i>Cd79a</i>    | - | + |
| <i>Cd79b</i>    | - | + |
| <i>Cd81</i>     | - | + |
| <i>Cd82</i>     | - | + |
| <i>Cd83</i>     | - | + |
| <i>Cd84</i>     | - | + |
| <i>Cd86</i>     | - | + |
| <i>Cd97</i>     | - | + |
| <i>Cdan1</i>    | - | + |
| <i>Cdc123</i>   | - | + |
| <i>Cdc14a</i>   | - | + |
| <i>Cdc16</i>    | - | + |
| <i>Cdc23</i>    | - | + |
| <i>Cdc25a</i>   | - | + |
| <i>Cdc25b</i>   | - | + |
| <i>Cdc25c</i>   | - | + |
| <i>Cdc26</i>    | - | + |
| <i>Cdc27</i>    | - | + |
| <i>Cdc34</i>    | - | + |
| <i>Cdc42</i>    | - | + |
| <i>Cdc42bpg</i> | - | + |
| <i>Cdc42se1</i> | - | + |
| <i>Cdc42se2</i> | - | + |
| <i>Cdc45</i>    | - | + |
| <i>Cdc6</i>     | - | + |
| <i>Cdc7</i>     | - | + |
| <i>Cdca2</i>    | - | + |
| <i>Cdca3</i>    | - | + |
| <i>Cdca4</i>    | - | + |

|                   |   |   |
|-------------------|---|---|
| <i>Cdca5</i>      | - | + |
| <i>Cdca7</i>      | - | + |
| <i>Cdca8</i>      | - | + |
| <i>Cdh24</i>      | - | + |
| <i>Cdip1</i>      | - | + |
| <i>Cdipt</i>      | - | + |
| <i>Cdk1</i>       | - | + |
| <i>Cdk10</i>      | - | + |
| <i>Cdk11b</i>     | - | + |
| <i>Cdk12</i>      | - | + |
| <i>Cdk13</i>      | - | + |
| <i>Cdk16</i>      | - | + |
| <i>Cdk17</i>      | - | + |
| <i>Cdk19</i>      | - | + |
| <i>Cdk2</i>       | - | + |
| <i>Cdk20</i>      | - | + |
| <i>Cdk2ap1</i>    | - | + |
| <i>Cdk2ap2</i>    | - | + |
| <i>Cdk5</i>       | - | + |
| <i>Cdk5r1</i>     | - | + |
| <i>Cdk5rap1</i>   | - | + |
| <i>Cdk5rap3</i>   | - | + |
| <i>Cdk6</i>       | - | + |
| <i>Cdk7</i>       | - | + |
| <i>Cdk8</i>       | - | + |
| <i>Cdk9</i>       | - | + |
| <i>Cdka11</i>     | - | + |
| <i>Cdkl1</i>      | - | + |
| <i>Cdkl3</i>      | - | + |
| <i>Cdkl4</i>      | - | + |
| <i>Cdkn2aip</i>   | - | + |
| <i>Cdkn2aipnl</i> | - | + |
| <i>Cdkn2c</i>     | - | + |
| <i>Cdkn3</i>      | - | + |
| <i>Cdnf</i>       | - | + |
| <i>Cds2</i>       | - | + |
| <i>Cdt1</i>       | - | + |
| <i>Cdv3</i>       | - | + |
| <i>Cebpg</i>      | - | + |
| <i>Cebpz</i>      | - | + |
| <i>Cecr2</i>      | - | + |
| <i>Cenpa</i>      | - | + |
| <i>Cenpb</i>      | - | + |
| <i>Cenpc1</i>     | - | + |
| <i>Cenpe</i>      | - | + |
| <i>Cenph</i>      | - | + |
| <i>Cenpi</i>      | - | + |
| <i>Cenpj</i>      | - | + |
| <i>Cenpk</i>      | - | + |
| <i>Cenpl</i>      | - | + |
| <i>Cenpm</i>      | - | + |
| <i>Cenpn</i>      | - | + |
| <i>Cenpo</i>      | - | + |

|                |   |   |
|----------------|---|---|
| <i>Cenpp</i>   | - | + |
| <i>Cenpq</i>   | - | + |
| <i>Cenpt</i>   | - | + |
| <i>Cenpw</i>   | - | + |
| <i>Cep104</i>  | - | + |
| <i>Cep110</i>  | - | + |
| <i>Cep152</i>  | - | + |
| <i>Cep164</i>  | - | + |
| <i>Cep170b</i> | - | + |
| <i>Cep19</i>   | - | + |
| <i>Cep192</i>  | - | + |
| <i>Cep290</i>  | - | + |
| <i>Cep44</i>   | - | + |
| <i>Cep57</i>   | - | + |
| <i>Cep5711</i> | - | + |
| <i>Cep63</i>   | - | + |
| <i>Cep68</i>   | - | + |
| <i>Cep76</i>   | - | + |
| <i>Cep78</i>   | - | + |
| <i>Cep89</i>   | - | + |
| <i>Cep95</i>   | - | + |
| <i>Cep97</i>   | - | + |
| <i>Cept1</i>   | - | + |
| <i>Cercam</i>  | - | + |
| <i>Cerk</i>    | - | + |
| <i>Cers2</i>   | - | + |
| <i>Cers4</i>   | - | + |
| <i>Cers5</i>   | - | + |
| <i>Cetn2</i>   | - | + |
| <i>Cetn3</i>   | - | + |
| <i>Cetn4</i>   | - | + |
| <i>Cfdp1</i>   | - | + |
| <i>Cfl1</i>    | - | + |
| <i>Cfl2</i>    | - | + |
| <i>Cflar</i>   | - | + |
| <i>Cggbp1</i>  | - | + |
| <i>Chac2</i>   | - | + |
| <i>Chaf1a</i>  | - | + |
| <i>Chaf1b</i>  | - | + |
| <i>Chchd1</i>  | - | + |
| <i>Chchd2</i>  | - | + |
| <i>Chchd4</i>  | - | + |
| <i>Chchd5</i>  | - | + |
| <i>Chchd6</i>  | - | + |
| <i>Chd11</i>   | - | + |
| <i>Chd2</i>    | - | + |
| <i>Chd3</i>    | - | + |
| <i>Chd4</i>    | - | + |
| <i>Chd6</i>    | - | + |
| <i>Chd9</i>    | - | + |
| <i>Chek1</i>   | - | + |
| <i>Chek2</i>   | - | + |
| <i>Cherp</i>   | - | + |

|                |   |   |
|----------------|---|---|
| <i>Chfr</i>    | - | + |
| <i>Chic2</i>   | - | + |
| <i>Chka</i>    | - | + |
| <i>Chkb</i>    | - | + |
| <i>Chmp2a</i>  | - | + |
| <i>Chmp2b</i>  | - | + |
| <i>Chmp4b</i>  | - | + |
| <i>Chmp5</i>   | - | + |
| <i>Chordc1</i> | - | + |
| <i>Chp1</i>    | - | + |
| <i>Chpf2</i>   | - | + |
| <i>Chrac1</i>  | - | + |
| <i>Chst10</i>  | - | + |
| <i>Chst12</i>  | - | + |
| <i>Chst14</i>  | - | + |
| <i>Chst15</i>  | - | + |
| <i>Chst3</i>   | - | + |
| <i>Chsy1</i>   | - | + |
| <i>Chtf18</i>  | - | + |
| <i>Chtf8</i>   | - | + |
| <i>Chuk</i>    | - | + |
| <i>Ciao1</i>   | - | + |
| <i>Ciapin1</i> | - | + |
| <i>Cib1</i>    | - | + |
| <i>Cic</i>     | - | + |
| <i>Ciita</i>   | - | + |
| <i>Cinp</i>    | - | + |
| <i>Cir1</i>    | - | + |
| <i>Cirbp</i>   | - | + |
| <i>Cirh1a</i>  | - | + |
| <i>Cisd1</i>   | - | + |
| <i>Cisd2</i>   | - | + |
| <i>Cit</i>     | - | + |
| <i>Cited2</i>  | - | + |
| <i>Cklf</i>    | - | + |
| <i>Cks1b</i>   | - | + |
| <i>Cks2</i>    | - | + |
| <i>Clasp1</i>  | - | + |
| <i>Clasp2</i>  | - | + |
| <i>Clasrp</i>  | - | + |
| <i>Clcc1</i>   | - | + |
| <i>Clcn3</i>   | - | + |
| <i>Clcn5</i>   | - | + |
| <i>Clcn6</i>   | - | + |
| <i>Clcn7</i>   | - | + |
| <i>Cldn25</i>  | - | + |
| <i>Clec16a</i> | - | + |
| <i>Clec2d</i>  | - | + |
| <i>Clec2i</i>  | - | + |
| <i>Clhc1</i>   | - | + |
| <i>Clic1</i>   | - | + |
| <i>Clip2</i>   | - | + |
| <i>Clk1</i>    | - | + |



|                |   |   |
|----------------|---|---|
| <i>Clk3</i>    | - | + |
| <i>Cln3</i>    | - | + |
| <i>Cln5</i>    | - | + |
| <i>Cln6</i>    | - | + |
| <i>Clns1a</i>  | - | + |
| <i>Clpb</i>    | - | + |
| <i>Clpp</i>    | - | + |
| <i>Clptm1</i>  | - | + |
| <i>Clptm1l</i> | - | + |
| <i>Clpx</i>    | - | + |
| <i>Clspn</i>   | - | + |
| <i>Clta</i>    | - | + |
| <i>Cltb</i>    | - | + |
| <i>Cltc</i>    | - | + |
| <i>Cluap1</i>  | - | + |
| <i>Cluh</i>    | - | + |
| <i>Clybl</i>   | - | + |
| <i>Cmah</i>    | - | + |
| <i>Cmc1</i>    | - | + |
| <i>Cmc2</i>    | - | + |
| <i>Cmip</i>    | - | + |
| <i>Cml1</i>    | - | + |
| <i>Cmpk1</i>   | - | + |
| <i>Cmpk2</i>   | - | + |
| <i>Cmss1</i>   | - | + |
| <i>Cmtm3</i>   | - | + |
| <i>Cmtm6</i>   | - | + |
| <i>Cmtm7</i>   | - | + |
| <i>Cnbd2</i>   | - | + |
| <i>Cndp2</i>   | - | + |
| <i>Cnih</i>    | - | + |
| <i>Cnih4</i>   | - | + |
| <i>Cnnm3</i>   | - | + |
| <i>Cnnm4</i>   | - | + |
| <i>Cnot1</i>   | - | + |
| <i>Cnot2</i>   | - | + |
| <i>Cnot3</i>   | - | + |
| <i>Cnot4</i>   | - | + |
| <i>Cnot6</i>   | - | + |
| <i>Cnot6l</i>  | - | + |
| <i>Cnot7</i>   | - | + |
| <i>Cnot8</i>   | - | + |
| <i>Cnp</i>     | - | + |
| <i>Cnppd1</i>  | - | + |
| <i>Cnpy2</i>   | - | + |
| <i>Cnpy3</i>   | - | + |
| <i>Cnpy4</i>   | - | + |
| <i>Cnr2</i>    | - | + |
| <i>Cnst</i>    | - | + |
| <i>Coa4</i>    | - | + |
| <i>Coa5</i>    | - | + |
| <i>Coa6</i>    | - | + |
| <i>Cog1</i>    | - | + |

|                 |   |   |
|-----------------|---|---|
| <i>Cog2</i>     | - | + |
| <i>Cog3</i>     | - | + |
| <i>Cog4</i>     | - | + |
| <i>Cog5</i>     | - | + |
| <i>Cog8</i>     | - | + |
| <i>Col4a3bp</i> | - | + |
| <i>Commd1</i>   | - | + |
| <i>Commd10</i>  | - | + |
| <i>Commd2</i>   | - | + |
| <i>Commd4</i>   | - | + |
| <i>Commd5</i>   | - | + |
| <i>Commd6</i>   | - | + |
| <i>Commd8</i>   | - | + |
| <i>Commd9</i>   | - | + |
| <i>Comt</i>     | - | + |
| <i>Comtd1</i>   | - | + |
| <i>Copa</i>     | - | + |
| <i>Copb1</i>    | - | + |
| <i>Cope</i>     | - | + |
| <i>Copg2</i>    | - | + |
| <i>Coprs</i>    | - | + |
| <i>Cops2</i>    | - | + |
| <i>Cops3</i>    | - | + |
| <i>Cops5</i>    | - | + |
| <i>Cops6</i>    | - | + |
| <i>Cops7a</i>   | - | + |
| <i>Cops7b</i>   | - | + |
| <i>Cops8</i>    | - | + |
| <i>Coq10a</i>   | - | + |
| <i>Coq10b</i>   | - | + |
| <i>Coq2</i>     | - | + |
| <i>Coq3</i>     | - | + |
| <i>Coq4</i>     | - | + |
| <i>Coq5</i>     | - | + |
| <i>Coq6</i>     | - | + |
| <i>Coq7</i>     | - | + |
| <i>Coq9</i>     | - | + |
| <i>Coro1a</i>   | - | + |
| <i>Coro1b</i>   | - | + |
| <i>Coro1c</i>   | - | + |
| <i>Coro2a</i>   | - | + |
| <i>Coro7</i>    | - | + |
| <i>Cox10</i>    | - | + |
| <i>Cox11</i>    | - | + |
| <i>Cox14</i>    | - | + |
| <i>Cox15</i>    | - | + |
| <i>Cox16</i>    | - | + |
| <i>Cox18</i>    | - | + |
| <i>Cox19</i>    | - | + |
| <i>Cox20</i>    | - | + |
| <i>Cox4i1</i>   | - | + |
| <i>Cox5a</i>    | - | + |
| <i>Cox5b</i>    | - | + |

|                |   |   |
|----------------|---|---|
| <i>Cox6b2</i>  | - | + |
| <i>Cox6c</i>   | - | + |
| <i>Cox7a2</i>  | - | + |
| <i>Cox7a2l</i> | - | + |
| <i>Cox7c</i>   | - | + |
| <i>Cox8a</i>   | - | + |
| <i>Cpne1</i>   | - | + |
| <i>Cpox</i>    | - | + |
| <i>Cpsf1</i>   | - | + |
| <i>Cpsf2</i>   | - | + |
| <i>Cpsf3</i>   | - | + |
| <i>Cpsf3l</i>  | - | + |
| <i>Cpsf4</i>   | - | + |
| <i>Cpsf7</i>   | - | + |
| <i>Cpt1a</i>   | - | + |
| <i>Cr1l</i>    | - | + |
| <i>Cr2</i>     | - | + |
| <i>Cradd</i>   | - | + |
| <i>Cramp1l</i> | - | + |
| <i>Crat</i>    | - | + |
| <i>Crbn</i>    | - | + |
| <i>Creb1</i>   | - | + |
| <i>Creb3</i>   | - | + |
| <i>Crebl2</i>  | - | + |
| <i>Creld2</i>  | - | + |
| <i>Creml</i>   | - | + |
| <i>Crip1</i>   | - | + |
| <i>Cript</i>   | - | + |
| <i>Crk</i>     | - | + |
| <i>Crkl</i>    | - | + |
| <i>Crif3</i>   | - | + |
| <i>Crls1</i>   | - | + |
| <i>Crocc</i>   | - | + |
| <i>Crot</i>    | - | + |
| <i>Crtap</i>   | - | + |
| <i>Crtc1</i>   | - | + |
| <i>Crtc2</i>   | - | + |
| <i>Crtc3</i>   | - | + |
| <i>Cryl1</i>   | - | + |
| <i>Cryz</i>    | - | + |
| <i>Cs</i>      | - | + |
| <i>Csde1</i>   | - | + |
| <i>Cse1l</i>   | - | + |
| <i>Csf2ra</i>  | - | + |
| <i>Csk</i>     | - | + |
| <i>Csnk1d</i>  | - | + |
| <i>Csnk1e</i>  | - | + |
| <i>Csnk1g1</i> | - | + |
| <i>Csnk1g2</i> | - | + |
| <i>Csnk1g3</i> | - | + |
| <i>Csnk2a1</i> | - | + |
| <i>Csnk2b</i>  | - | + |
| <i>Cspp1</i>   | - | + |

|                 |   |   |
|-----------------|---|---|
| <i>Csrnp1</i>   | - | + |
| <i>Csrp1</i>    | - | + |
| <i>Csrp2bp</i>  | - | + |
| <i>Cst3</i>     | - | + |
| <i>Cstb</i>     | - | + |
| <i>Cstf1</i>    | - | + |
| <i>Cstf2</i>    | - | + |
| <i>Cstf3</i>    | - | + |
| <i>Ctage5</i>   | - | + |
| <i>Ctbp1</i>    | - | + |
| <i>Ctbs</i>     | - | + |
| <i>Ctc1</i>     | - | + |
| <i>Ctcf</i>     | - | + |
| <i>Ctdnep1</i>  | - | + |
| <i>Ctdp1</i>    | - | + |
| <i>Ctdsp2</i>   | - | + |
| <i>Ctdspl2</i>  | - | + |
| <i>Ctnna3</i>   | - | + |
| <i>Ctnnal1</i>  | - | + |
| <i>Ctnnb1</i>   | - | + |
| <i>Ctns</i>     | - | + |
| <i>Ctps</i>     | - | + |
| <i>Ctps2</i>    | - | + |
| <i>Ctsa</i>     | - | + |
| <i>Ctsd</i>     | - | + |
| <i>Ctsh</i>     | - | + |
| <i>Ctso</i>     | - | + |
| <i>Ctss</i>     | - | + |
| <i>Ctsz</i>     | - | + |
| <i>Ctu1</i>     | - | + |
| <i>Ctu2</i>     | - | + |
| <i>Ctxn1</i>    | - | + |
| <i>Cul1</i>     | - | + |
| <i>Cul3</i>     | - | + |
| <i>Cul4a</i>    | - | + |
| <i>Cul5</i>     | - | + |
| <i>Cul7</i>     | - | + |
| <i>Cul9</i>     | - | + |
| <i>Cutc</i>     | - | + |
| <i>Cwc15</i>    | - | + |
| <i>Cwc22</i>    | - | + |
| <i>Cwc25</i>    | - | + |
| <i>Cwc27</i>    | - | + |
| <i>Cwf19l1</i>  | - | + |
| <i>Cxcl10</i>   | - | + |
| <i>Cxcr4</i>    | - | + |
| <i>Cxcr5</i>    | - | + |
| <i>Cxxc1</i>    | - | + |
| <i>Cxxc5</i>    | - | + |
| <i>Cyb5</i>     | - | + |
| <i>Cyb561d1</i> | - | + |
| <i>Cyb561d2</i> | - | + |
| <i>Cyb5d1</i>   | - | + |

|                      |   |   |
|----------------------|---|---|
| <i>Cyb5d2</i>        | - | + |
| <i>Cyb5r1</i>        | - | + |
| <i>Cyb5r3</i>        | - | + |
| <i>Cyba</i>          | - | + |
| <i>Cybasc3</i>       | - | + |
| <i>Cybb</i>          | - | + |
| <i>Cyc1</i>          | - | + |
| <i>Cycs</i>          | - | + |
| <i>Cytip2</i>        | - | + |
| <i>Cyld</i>          | - | + |
| <i>Cyp20a1</i>       | - | + |
| <i>Cyp2r1</i>        | - | + |
| <i>Cyp2u1</i>        | - | + |
| <i>Cyp4f13</i>       | - | + |
| <i>Cyp4f41-ps</i>    | - | + |
| <i>Cyp4v3</i>        | - | + |
| <i>Cyp51</i>         | - | + |
| <i>Cysltr2</i>       | - | + |
| <i>Cyth1</i>         | - | + |
| <i>Cyth2</i>         | - | + |
| <i>Cyth4</i>         | - | + |
| <i>D030028A08Rik</i> | - | + |
| <i>D030040B21Rik</i> | - | + |
| <i>D030047H15Rik</i> | - | + |
| <i>D030056L22Rik</i> | - | + |
| <i>D10Jhu81e</i>     | - | + |
| <i>D10Wsu102e</i>    | - | + |
| <i>D11Wsu47e</i>     | - | + |
| <i>D130017N08Rik</i> | - | + |
| <i>D130020L05Rik</i> | - | + |
| <i>D130040H23Rik</i> | - | + |
| <i>D14Abb1e</i>      | - | + |
| <i>D15Ertd621e</i>   | - | + |
| <i>D16Ertd472e</i>   | - | + |
| <i>D17Wsu104e</i>    | - | + |
| <i>D17Wsu92e</i>     | - | + |
| <i>D19Bwg1357e</i>   | - | + |
| <i>D1Ertd622e</i>    | - | + |
| <i>D230025D16Rik</i> | - | + |
| <i>D2hgdh</i>        | - | + |
| <i>D2Wsu81e</i>      | - | + |
| <i>D330023K18Rik</i> | - | + |
| <i>D330041H03Rik</i> | - | + |
| <i>D330050I16Rik</i> | - | + |
| <i>D3Ertd751e</i>    | - | + |
| <i>D430020J02Rik</i> | - | + |
| <i>D430042O09Rik</i> | - | + |
| <i>D4Wsu53e</i>      | - | + |
| <i>D5Ertd579e</i>    | - | + |
| <i>D630032N06Rik</i> | - | + |
| <i>D630037F22Rik</i> | - | + |
| <i>D6Wsu163e</i>     | - | + |
| <i>D730005E14Rik</i> | - | + |

|                      |   |   |
|----------------------|---|---|
| <i>D830031N03Rik</i> | - | + |
| <i>D8Ert738e</i>     | - | + |
| <i>D8Ert82e</i>      | - | + |
| <i>D930015E06Rik</i> | - | + |
| <i>D930048N14Rik</i> | - | + |
| <i>Dag1</i>          | - | + |
| <i>Dak</i>           | - | + |
| <i>Dalrd3</i>        | - | + |
| <i>Dancr</i>         | - | + |
| <i>Dand5</i>         | - | + |
| <i>Dap</i>           | - | + |
| <i>Dap3</i>          | - | + |
| <i>Dapk3</i>         | - | + |
| <i>Dapp1</i>         | - | + |
| <i>Dars2</i>         | - | + |
| <i>Daxx</i>          | - | + |
| <i>Dazap1</i>        | - | + |
| <i>Dazap2</i>        | - | + |
| <i>Dbf4</i>          | - | + |
| <i>Dbi</i>           | - | + |
| <i>Dbil5</i>         | - | + |
| <i>Dbnl</i>          | - | + |
| <i>Dbt</i>           | - | + |
| <i>Dcaf11</i>        | - | + |
| <i>Dcaf12</i>        | - | + |
| <i>Dcaf13</i>        | - | + |
| <i>Dcaf15</i>        | - | + |
| <i>Dcaf17</i>        | - | + |
| <i>Dcaf6</i>         | - | + |
| <i>Dcaf7</i>         | - | + |
| <i>Dcaf8</i>         | - | + |
| <i>Dcakd</i>         | - | + |
| <i>Dck</i>           | - | + |
| <i>Dclre1a</i>       | - | + |
| <i>Dclre1b</i>       | - | + |
| <i>Dclre1c</i>       | - | + |
| <i>Dcp1a</i>         | - | + |
| <i>Dcp1b</i>         | - | + |
| <i>Dcp2</i>          | - | + |
| <i>Dcps</i>          | - | + |
| <i>Dctd</i>          | - | + |
| <i>Dctn4</i>         | - | + |
| <i>Dctn5</i>         | - | + |
| <i>Dctn6</i>         | - | + |
| <i>Dctpp1</i>        | - | + |
| <i>Dcun1d1</i>       | - | + |
| <i>Dcun1d2</i>       | - | + |
| <i>Dcun1d3</i>       | - | + |
| <i>Dcun1d5</i>       | - | + |
| <i>Dda1</i>          | - | + |
| <i>Ddah2</i>         | - | + |
| <i>Ddb1</i>          | - | + |
| <i>Ddb2</i>          | - | + |

|                |   |   |
|----------------|---|---|
| <i>Ddhd2</i>   | - | + |
| <i>Ddit3</i>   | - | + |
| <i>Ddit4</i>   | - | + |
| <i>Ddost</i>   | - | + |
| <i>Ddrgk1</i>  | - | + |
| <i>Ddt</i>     | - | + |
| <i>Ddx11</i>   | - | + |
| <i>Ddx18</i>   | - | + |
| <i>Ddx19a</i>  | - | + |
| <i>Ddx19b</i>  | - | + |
| <i>Ddx21</i>   | - | + |
| <i>Ddx24</i>   | - | + |
| <i>Ddx26b</i>  | - | + |
| <i>Ddx28</i>   | - | + |
| <i>Ddx31</i>   | - | + |
| <i>Ddx39</i>   | - | + |
| <i>Ddx39b</i>  | - | + |
| <i>Ddx3x</i>   | - | + |
| <i>Ddx41</i>   | - | + |
| <i>Ddx42</i>   | - | + |
| <i>Ddx46</i>   | - | + |
| <i>Ddx47</i>   | - | + |
| <i>Ddx49</i>   | - | + |
| <i>Ddx5</i>    | - | + |
| <i>Ddx51</i>   | - | + |
| <i>Ddx54</i>   | - | + |
| <i>Ddx55</i>   | - | + |
| <i>Ddx56</i>   | - | + |
| <i>Ddx58</i>   | - | + |
| <i>Ddx59</i>   | - | + |
| <i>Ddx6</i>    | - | + |
| <i>Ddx60</i>   | - | + |
| <i>Deaf1</i>   | - | + |
| <i>Decr2</i>   | - | + |
| <i>Dedd</i>    | - | + |
| <i>Dedd2</i>   | - | + |
| <i>Def6</i>    | - | + |
| <i>Def8</i>    | - | + |
| <i>Degs1</i>   | - | + |
| <i>Dek</i>     | - | + |
| <i>Dennd1a</i> | - | + |
| <i>Dennd1b</i> | - | + |
| <i>Dennd1c</i> | - | + |
| <i>Dennd3</i>  | - | + |
| <i>Dennd4a</i> | - | + |
| <i>Dennd4b</i> | - | + |
| <i>Dennd5b</i> | - | + |
| <i>Dennd6a</i> | - | + |
| <i>Dennd6b</i> | - | + |
| <i>Denr</i>    | - | + |
| <i>Depdc5</i>  | - | + |
| <i>Dera</i>    | - | + |
| <i>Der11</i>   | - | + |

|               |   |   |
|---------------|---|---|
| <i>Derl2</i>  | - | + |
| <i>Derl3</i>  | - | + |
| <i>Desi1</i>  | - | + |
| <i>Det1</i>   | - | + |
| <i>Dexi</i>   | - | + |
| <i>Dffb</i>   | - | + |
| <i>Dgcr2</i>  | - | + |
| <i>Dgcr8</i>  | - | + |
| <i>Dgka</i>   | - | + |
| <i>Dgkd</i>   | - | + |
| <i>Dgke</i>   | - | + |
| <i>Dgkg</i>   | - | + |
| <i>Dguok</i>  | - | + |
| <i>Dhcr24</i> | - | + |
| <i>Dhcr7</i>  | - | + |
| <i>Dhdds</i>  | - | + |
| <i>Dhdh</i>   | - | + |
| <i>Dhfr</i>   | - | + |
| <i>Dhodh</i>  | - | + |
| <i>Dhps</i>   | - | + |
| <i>Dhrs1</i>  | - | + |
| <i>Dhrs11</i> | - | + |
| <i>Dhrs3</i>  | - | + |
| <i>Dhrs4</i>  | - | + |
| <i>Dhrs7</i>  | - | + |
| <i>Dhrs7b</i> | - | + |
| <i>Dhx15</i>  | - | + |
| <i>Dhx16</i>  | - | + |
| <i>Dhx29</i>  | - | + |
| <i>Dhx30</i>  | - | + |
| <i>Dhx33</i>  | - | + |
| <i>Dhx34</i>  | - | + |
| <i>Dhx35</i>  | - | + |
| <i>Dhx36</i>  | - | + |
| <i>Dhx37</i>  | - | + |
| <i>Dhx38</i>  | - | + |
| <i>Dhx40</i>  | - | + |
| <i>Dhx57</i>  | - | + |
| <i>Dhx58</i>  | - | + |
| <i>Dhx8</i>   | - | + |
| <i>Dhx9</i>   | - | + |
| <i>Diablo</i> | - | + |
| <i>Diap1</i>  | - | + |
| <i>Diap2</i>  | - | + |
| <i>Diap3</i>  | - | + |
| <i>Dido1</i>  | - | + |
| <i>Diexf</i>  | - | + |
| <i>Dimt1</i>  | - | + |
| <i>Dis3</i>   | - | + |
| <i>Dis3l</i>  | - | + |
| <i>Dis3l2</i> | - | + |
| <i>Dkc1</i>   | - | + |
| <i>Dld</i>    | - | + |



|                 |   |   |
|-----------------|---|---|
| <i>Dlg3</i>     | - | + |
| <i>Dlgap5</i>   | - | + |
| <i>Dlst</i>     | - | + |
| <i>Dmap1</i>    | - | + |
| <i>Dna2</i>     | - | + |
| <i>Dnaaf2</i>   | - | + |
| <i>Dnahc1</i>   | - | + |
| <i>Dnahc6</i>   | - | + |
| <i>Dnaja1</i>   | - | + |
| <i>Dnaja2</i>   | - | + |
| <i>Dnaja3</i>   | - | + |
| <i>Dnajb1</i>   | - | + |
| <i>Dnajb11</i>  | - | + |
| <i>Dnajb14</i>  | - | + |
| <i>Dnajb6</i>   | - | + |
| <i>Dnajb9</i>   | - | + |
| <i>Dnajc11</i>  | - | + |
| <i>Dnajc12</i>  | - | + |
| <i>Dnajc13</i>  | - | + |
| <i>Dnajc15</i>  | - | + |
| <i>Dnajc16</i>  | - | + |
| <i>Dnajc17</i>  | - | + |
| <i>Dnajc18</i>  | - | + |
| <i>Dnajc19</i>  | - | + |
| <i>Dnajc2</i>   | - | + |
| <i>Dnajc21</i>  | - | + |
| <i>Dnajc25</i>  | - | + |
| <i>Dnajc3</i>   | - | + |
| <i>Dnajc30</i>  | - | + |
| <i>Dnajc4</i>   | - | + |
| <i>Dnajc5</i>   | - | + |
| <i>Dnajc7</i>   | - | + |
| <i>Dnajc8</i>   | - | + |
| <i>Dnajc9</i>   | - | + |
| <i>Dnalc1</i>   | - | + |
| <i>Dnalc4</i>   | - | + |
| <i>Dnali1</i>   | - | + |
| <i>Dnase111</i> | - | + |
| <i>Dnase2a</i>  | - | + |
| <i>Dnlz</i>     | - | + |
| <i>Dnm11</i>    | - | + |
| <i>Dnm2</i>     | - | + |
| <i>Dnmt1</i>    | - | + |
| <i>Dnmt3b</i>   | - | + |
| <i>Dnpep</i>    | - | + |
| <i>Dnttip2</i>  | - | + |
| <i>Dock11</i>   | - | + |
| <i>Dock2</i>    | - | + |
| <i>Dock6</i>    | - | + |
| <i>Dock8</i>    | - | + |
| <i>Dock9</i>    | - | + |
| <i>Dohh</i>     | - | + |
| <i>Dok1</i>     | - | + |

|                |   |   |
|----------------|---|---|
| <i>Dok3</i>    | - | + |
| <i>Dolk</i>    | - | + |
| <i>Dolpp1</i>  | - | + |
| <i>Dom3z</i>   | - | + |
| <i>Donson</i>  | - | + |
| <i>Dot1l</i>   | - | + |
| <i>Dpagt1</i>  | - | + |
| <i>Dpcd</i>    | - | + |
| <i>Dpf2</i>    | - | + |
| <i>Dph2</i>    | - | + |
| <i>Dph3</i>    | - | + |
| <i>Dph5</i>    | - | + |
| <i>Dpm1</i>    | - | + |
| <i>Dpm2</i>    | - | + |
| <i>Dpp3</i>    | - | + |
| <i>Dpp7</i>    | - | + |
| <i>Dpp8</i>    | - | + |
| <i>Dpp9</i>    | - | + |
| <i>Dpy19l1</i> | - | + |
| <i>Dpy19l3</i> | - | + |
| <i>Dpy30</i>   | - | + |
| <i>Dpysl2</i>  | - | + |
| <i>Dr1</i>     | - | + |
| <i>Dram2</i>   | - | + |
| <i>Drg2</i>    | - | + |
| <i>Drosha</i>  | - | + |
| <i>Dscr3</i>   | - | + |
| <i>Dsel</i>    | - | + |
| <i>Dsn1</i>    | - | + |
| <i>Dtd1</i>    | - | + |
| <i>Dtd2</i>    | - | + |
| <i>Dtl</i>     | - | + |
| <i>Dtnb</i>    | - | + |
| <i>Dtnbp1</i>  | - | + |
| <i>Dtwd2</i>   | - | + |
| <i>Dtx1</i>    | - | + |
| <i>Dtx2</i>    | - | + |
| <i>Dtx3</i>    | - | + |
| <i>Dtx3l</i>   | - | + |
| <i>Dtymk</i>   | - | + |
| <i>Dus2l</i>   | - | + |
| <i>Dus3l</i>   | - | + |
| <i>Dus4l</i>   | - | + |
| <i>Dusp1</i>   | - | + |
| <i>Dusp10</i>  | - | + |
| <i>Dusp11</i>  | - | + |
| <i>Dusp12</i>  | - | + |
| <i>Dusp14</i>  | - | + |
| <i>Dusp16</i>  | - | + |
| <i>Dusp2</i>   | - | + |
| <i>Dusp22</i>  | - | + |
| <i>Dusp23</i>  | - | + |
| <i>Dusp28</i>  | - | + |

|                      |   |   |
|----------------------|---|---|
| <i>Dusp6</i>         | - | + |
| <i>Dusp7</i>         | - | + |
| <i>Dut</i>           | - | + |
| <i>Dvl1</i>          | - | + |
| <i>Dvl2</i>          | - | + |
| <i>Dvl3</i>          | - | + |
| <i>Dym</i>           | - | + |
| <i>Dync1h1</i>       | - | + |
| <i>Dync1li1</i>      | - | + |
| <i>Dync1li2</i>      | - | + |
| <i>Dync2h1</i>       | - | + |
| <i>Dynll1</i>        | - | + |
| <i>Dynll2</i>        | - | + |
| <i>Dynlrb1</i>       | - | + |
| <i>Dynlt1a</i>       | - | + |
| <i>Dynlt3</i>        | - | + |
| <i>Dyrk1b</i>        | - | + |
| <i>Dyrk3</i>         | - | + |
| <i>Dyx1c1</i>        | - | + |
| <i>Dzip3</i>         | - | + |
| <i>E130112N10Rik</i> | - | + |
| <i>E130215H24Rik</i> | - | + |
| <i>E130304I02Rik</i> | - | + |
| <i>E130307A14Rik</i> | - | + |
| <i>E130308A19Rik</i> | - | + |
| <i>E130309D02Rik</i> | - | + |
| <i>E130311K13Rik</i> | - | + |
| <i>E130317F20Rik</i> | - | + |
| <i>E2f1</i>          | - | + |
| <i>E2f2</i>          | - | + |
| <i>E2f3</i>          | - | + |
| <i>E2f4</i>          | - | + |
| <i>E330020D12Rik</i> | - | + |
| <i>E430025E21Rik</i> | - | + |
| <i>E4f1</i>          | - | + |
| <i>Eaf1</i>          | - | + |
| <i>Eaf2</i>          | - | + |
| <i>Ears2</i>         | - | + |
| <i>Ebag9</i>         | - | + |
| <i>Ebf1</i>          | - | + |
| <i>Ebi3</i>          | - | + |
| <i>Ebna1bp2</i>      | - | + |
| <i>Ebp</i>           | - | + |
| <i>Ecd</i>           | - | + |
| <i>Ece1</i>          | - | + |
| <i>Ech1</i>          | - | + |
| <i>Echdc1</i>        | - | + |
| <i>Echdc3</i>        | - | + |
| <i>Echs1</i>         | - | + |
| <i>Eci1</i>          | - | + |
| <i>Eci2</i>          | - | + |
| <i>Ecsit</i>         | - | + |
| <i>Ect2</i>          | - | + |

|                |   |   |
|----------------|---|---|
| <i>Edc3</i>    | - | + |
| <i>Edc4</i>    | - | + |
| <i>Edem1</i>   | - | + |
| <i>Edem3</i>   | - | + |
| <i>Edf1</i>    | - | + |
| <i>Eea1</i>    | - | + |
| <i>Eed</i>     | - | + |
| <i>Eef1b2</i>  | - | + |
| <i>Eef1d</i>   | - | + |
| <i>Eef1e1</i>  | - | + |
| <i>Eef1g</i>   | - | + |
| <i>Eef2</i>    | - | + |
| <i>Eepd1</i>   | - | + |
| <i>Efcab11</i> | - | + |
| <i>Efcab2</i>  | - | + |
| <i>Efcab7</i>  | - | + |
| <i>Efcab8</i>  | - | + |
| <i>Efha1</i>   | - | + |
| <i>Efnb1</i>   | - | + |
| <i>Eftud1</i>  | - | + |
| <i>Egfl7</i>   | - | + |
| <i>Egln2</i>   | - | + |
| <i>Egr1</i>    | - | + |
| <i>Ehbp111</i> | - | + |
| <i>Ehd1</i>    | - | + |
| <i>Ehd4</i>    | - | + |
| <i>Ehf</i>     | - | + |
| <i>Ehhadh</i>  | - | + |
| <i>Ehmt1</i>   | - | + |
| <i>Ehmt2</i>   | - | + |
| <i>Ei24</i>    | - | + |
| <i>Eid1</i>    | - | + |
| <i>Eif1</i>    | - | + |
| <i>Eif1a</i>   | - | + |
| <i>Eif1ad</i>  | - | + |
| <i>Eif1ax</i>  | - | + |
| <i>Eif1b</i>   | - | + |
| <i>Eif2a</i>   | - | + |
| <i>Eif2ak1</i> | - | + |
| <i>Eif2ak2</i> | - | + |
| <i>Eif2ak3</i> | - | + |
| <i>Eif2b1</i>  | - | + |
| <i>Eif2b2</i>  | - | + |
| <i>Eif2b3</i>  | - | + |
| <i>Eif2b4</i>  | - | + |
| <i>Eif2b5</i>  | - | + |
| <i>Eif2c1</i>  | - | + |
| <i>Eif2c2</i>  | - | + |
| <i>Eif2c3</i>  | - | + |
| <i>Eif2d</i>   | - | + |
| <i>Eif2s1</i>  | - | + |
| <i>Eif2s3x</i> | - | + |
| <i>Eif3b</i>   | - | + |

|                |   |   |
|----------------|---|---|
| <i>Eif3c</i>   | - | + |
| <i>Eif3d</i>   | - | + |
| <i>Eif3e</i>   | - | + |
| <i>Eif3f</i>   | - | + |
| <i>Eif3g</i>   | - | + |
| <i>Eif3h</i>   | - | + |
| <i>Eif3i</i>   | - | + |
| <i>Eif3j1</i>  | - | + |
| <i>Eif3j2</i>  | - | + |
| <i>Eif3k</i>   | - | + |
| <i>Eif3m</i>   | - | + |
| <i>Eif4a1</i>  | - | + |
| <i>Eif4a2</i>  | - | + |
| <i>Eif4e</i>   | - | + |
| <i>Eif4e2</i>  | - | + |
| <i>Eif4g1</i>  | - | + |
| <i>Eif4g2</i>  | - | + |
| <i>Eif4g3</i>  | - | + |
| <i>Eif4h</i>   | - | + |
| <i>Eif5</i>    | - | + |
| <i>Eif5a</i>   | - | + |
| <i>Eif5a2</i>  | - | + |
| <i>Eif5b</i>   | - | + |
| <i>Eif6</i>    | - | + |
| <i>Elac1</i>   | - | + |
| <i>Elac2</i>   | - | + |
| <i>Elavl1</i>  | - | + |
| <i>Elf1</i>    | - | + |
| <i>Elk1</i>    | - | + |
| <i>Elk3</i>    | - | + |
| <i>Elk4</i>    | - | + |
| <i>Ell</i>     | - | + |
| <i>Ell3</i>    | - | + |
| <i>Elmo2</i>   | - | + |
| <i>Elmod3</i>  | - | + |
| <i>Elmsan1</i> | - | + |
| <i>Elovl1</i>  | - | + |
| <i>Elovl5</i>  | - | + |
| <i>Elovl6</i>  | - | + |
| <i>Elp2</i>    | - | + |
| <i>Elp4</i>    | - | + |
| <i>Elp5</i>    | - | + |
| <i>Elp6</i>    | - | + |
| <i>Emc1</i>    | - | + |
| <i>Emc10</i>   | - | + |
| <i>Emc2</i>    | - | + |
| <i>Emc3</i>    | - | + |
| <i>Emc7</i>    | - | + |
| <i>Emc8</i>    | - | + |
| <i>Emc9</i>    | - | + |
| <i>Emd</i>     | - | + |
| <i>Eme1</i>    | - | + |
| <i>Eme2</i>    | - | + |

|                 |   |   |
|-----------------|---|---|
| <i>Emg1</i>     | - | + |
| <i>Emid1</i>    | - | + |
| <i>Eml3</i>     | - | + |
| <i>Eml4</i>     | - | + |
| <i>Emp3</i>     | - | + |
| <i>Endod1</i>   | - | + |
| <i>Endog</i>    | - | + |
| <i>Endov</i>    | - | + |
| <i>Enkd1</i>    | - | + |
| <i>Eno1</i>     | - | + |
| <i>Eno3</i>     | - | + |
| <i>Eno4</i>     | - | + |
| <i>Enoph1</i>   | - | + |
| <i>Enpp1</i>    | - | + |
| <i>Ensa</i>     | - | + |
| <i>Enthd2</i>   | - | + |
| <i>Entpd5</i>   | - | + |
| <i>Entpd7</i>   | - | + |
| <i>Eny2</i>     | - | + |
| <i>Eogt</i>     | - | + |
| <i>Ep300</i>    | - | + |
| <i>Ep400</i>    | - | + |
| <i>Epb4.1</i>   | - | + |
| <i>Epc1</i>     | - | + |
| <i>Ephx1</i>    | - | + |
| <i>Epm2aip1</i> | - | + |
| <i>Epn1</i>     | - | + |
| <i>Eppk1</i>    | - | + |
| <i>Eprs</i>     | - | + |
| <i>Eps15</i>    | - | + |
| <i>Eps15l1</i>  | - | + |
| <i>Epsti1</i>   | - | + |
| <i>Ept1</i>     | - | + |
| <i>Erap1</i>    | - | + |
| <i>Ercc2</i>    | - | + |
| <i>Ercc3</i>    | - | + |
| <i>Ercc4</i>    | - | + |
| <i>Ercc5</i>    | - | + |
| <i>Ercc6</i>    | - | + |
| <i>Ercc6l</i>   | - | + |
| <i>Ercc6l2</i>  | - | + |
| <i>Ercc8</i>    | - | + |
| <i>Ergic1</i>   | - | + |
| <i>Ergic2</i>   | - | + |
| <i>Ergic3</i>   | - | + |
| <i>Erh</i>      | - | + |
| <i>Eri1</i>     | - | + |
| <i>Eri2</i>     | - | + |
| <i>Eri3</i>     | - | + |
| <i>Erlec1</i>   | - | + |
| <i>Erlin1</i>   | - | + |
| <i>Ermp1</i>    | - | + |
| <i>Ero1lb</i>   | - | + |

|                      |   |   |
|----------------------|---|---|
| <i>Erp44</i>         | - | + |
| <i>Esco1</i>         | - | + |
| <i>Esco2</i>         | - | + |
| <i>Esf1</i>          | - | + |
| <i>Espl1</i>         | - | + |
| <i>Esr1</i>          | - | + |
| <i>Esy1</i>          | - | + |
| <i>Etaa1</i>         | - | + |
| <i>Etf1</i>          | - | + |
| <i>Etfdh</i>         | - | + |
| <i>Ethe1</i>         | - | + |
| <i>Etohd2</i>        | - | + |
| <i>Etohi1</i>        | - | + |
| <i>Ets1</i>          | - | + |
| <i>Ets2</i>          | - | + |
| <i>Etv3</i>          | - | + |
| <i>Etv6</i>          | - | + |
| <i>Eva1b</i>         | - | + |
| <i>Evi2b</i>         | - | + |
| <i>Evi5l</i>         | - | + |
| <i>Ewsr1</i>         | - | + |
| <i>Exd1</i>          | - | + |
| <i>Exd2</i>          | - | + |
| <i>Exo1</i>          | - | + |
| <i>Exo5</i>          | - | + |
| <i>Exoc1</i>         | - | + |
| <i>Exoc3</i>         | - | + |
| <i>Exoc3l</i>        | - | + |
| <i>Exoc4</i>         | - | + |
| <i>Exoc5</i>         | - | + |
| <i>Exoc8</i>         | - | + |
| <i>Exog</i>          | - | + |
| <i>Exosc1</i>        | - | + |
| <i>Exosc10</i>       | - | + |
| <i>Exosc2</i>        | - | + |
| <i>Exosc4</i>        | - | + |
| <i>Exosc5</i>        | - | + |
| <i>Exosc6</i>        | - | + |
| <i>Exosc7</i>        | - | + |
| <i>Exosc8</i>        | - | + |
| <i>Ext2</i>          | - | + |
| <i>Extl2</i>         | - | + |
| <i>Extl3</i>         | - | + |
| <i>Eya3</i>          | - | + |
| <i>Ezh2</i>          | - | + |
| <i>Ezr</i>           | - | + |
| <i>F420014N23Rik</i> | - | + |
| <i>F730043M19Rik</i> | - | + |
| <i>F8a</i>           | - | + |
| <i>Fadd</i>          | - | + |
| <i>Fads1</i>         | - | + |
| <i>Fads2</i>         | - | + |
| <i>Faf1</i>          | - | + |

|                  |   |   |
|------------------|---|---|
| <i>Fah</i>       | - | + |
| <i>Fahd2a</i>    | - | + |
| <i>Faim3</i>     | - | + |
| <i>Fam102a</i>   | - | + |
| <i>Fam103a1</i>  | - | + |
| <i>Fam104a</i>   | - | + |
| <i>Fam105b</i>   | - | + |
| <i>Fam107b</i>   | - | + |
| <i>Fam108a</i>   | - | + |
| <i>Fam108b</i>   | - | + |
| <i>Fam111a</i>   | - | + |
| <i>Fam114a2</i>  | - | + |
| <i>Fam117a</i>   | - | + |
| <i>Fam117b</i>   | - | + |
| <i>Fam118a</i>   | - | + |
| <i>Fam118b</i>   | - | + |
| <i>Fam120a</i>   | - | + |
| <i>Fam120aos</i> | - | + |
| <i>Fam120c</i>   | - | + |
| <i>Fam122a</i>   | - | + |
| <i>Fam122b</i>   | - | + |
| <i>Fam126a</i>   | - | + |
| <i>Fam126b</i>   | - | + |
| <i>Fam133b</i>   | - | + |
| <i>Fam134a</i>   | - | + |
| <i>Fam134b</i>   | - | + |
| <i>Fam134c</i>   | - | + |
| <i>Fam136a</i>   | - | + |
| <i>Fam149b</i>   | - | + |
| <i>Fam151b</i>   | - | + |
| <i>Fam154b</i>   | - | + |
| <i>Fam160b1</i>  | - | + |
| <i>Fam161b</i>   | - | + |
| <i>Fam162a</i>   | - | + |
| <i>Fam167a</i>   | - | + |
| <i>Fam167b</i>   | - | + |
| <i>Fam168b</i>   | - | + |
| <i>Fam172a</i>   | - | + |
| <i>Fam173a</i>   | - | + |
| <i>Fam173b</i>   | - | + |
| <i>Fam174a</i>   | - | + |
| <i>Fam175a</i>   | - | + |
| <i>Fam175b</i>   | - | + |
| <i>Fam179b</i>   | - | + |
| <i>Fam185a</i>   | - | + |
| <i>Fam188a</i>   | - | + |
| <i>Fam192a</i>   | - | + |
| <i>Fam193a</i>   | - | + |
| <i>Fam193b</i>   | - | + |
| <i>Fam195b</i>   | - | + |
| <i>Fam199x</i>   | - | + |
| <i>Fam203a</i>   | - | + |
| <i>Fam207a</i>   | - | + |



|                |   |   |
|----------------|---|---|
| <i>Fam21</i>   | - | + |
| <i>Fam210a</i> | - | + |
| <i>Fam211a</i> | - | + |
| <i>Fam214a</i> | - | + |
| <i>Fam216a</i> | - | + |
| <i>Fam219b</i> | - | + |
| <i>Fam221a</i> | - | + |
| <i>Fam222b</i> | - | + |
| <i>Fam227a</i> | - | + |
| <i>Fam229b</i> | - | + |
| <i>Fam26f</i>  | - | + |
| <i>Fam32a</i>  | - | + |
| <i>Fam35a</i>  | - | + |
| <i>Fam3a</i>   | - | + |
| <i>Fam3c</i>   | - | + |
| <i>Fam49b</i>  | - | + |
| <i>Fam50a</i>  | - | + |
| <i>Fam53a</i>  | - | + |
| <i>Fam53b</i>  | - | + |
| <i>Fam53c</i>  | - | + |
| <i>Fam60a</i>  | - | + |
| <i>Fam63a</i>  | - | + |
| <i>Fam63b</i>  | - | + |
| <i>Fam65b</i>  | - | + |
| <i>Fam69a</i>  | - | + |
| <i>Fam71e1</i> | - | + |
| <i>Fam72a</i>  | - | + |
| <i>Fam73a</i>  | - | + |
| <i>Fam73b</i>  | - | + |
| <i>Fam76b</i>  | - | + |
| <i>Fam83d</i>  | - | + |
| <i>Fam83g</i>  | - | + |
| <i>Fam84b</i>  | - | + |
| <i>Fam96a</i>  | - | + |
| <i>Fam96b</i>  | - | + |
| <i>Fan1</i>    | - | + |
| <i>FanCb</i>   | - | + |
| <i>FanCc</i>   | - | + |
| <i>FanCd2</i>  | - | + |
| <i>FanCe</i>   | - | + |
| <i>FanCf</i>   | - | + |
| <i>FanCg</i>   | - | + |
| <i>FanCi</i>   | - | + |
| <i>FanCm</i>   | - | + |
| <i>Fars2</i>   | - | + |
| <i>Farsa</i>   | - | + |
| <i>Fas</i>     | - | + |
| <i>Fasn</i>    | - | + |
| <i>Fastk</i>   | - | + |
| <i>Fastkd2</i> | - | + |
| <i>Fastkd3</i> | - | + |
| <i>Fau</i>     | - | + |
| <i>Fbf1</i>    | - | + |

|                |   |   |
|----------------|---|---|
| <i>Fbl</i>     | - | + |
| <i>Fbxl12</i>  | - | + |
| <i>Fbxl14</i>  | - | + |
| <i>Fbxl17</i>  | - | + |
| <i>Fbxl18</i>  | - | + |
| <i>Fbxl19</i>  | - | + |
| <i>Fbxl3</i>   | - | + |
| <i>Fbxl4</i>   | - | + |
| <i>Fbxl5</i>   | - | + |
| <i>Fbxl6</i>   | - | + |
| <i>Fbxo11</i>  | - | + |
| <i>Fbxo18</i>  | - | + |
| <i>Fbxo21</i>  | - | + |
| <i>Fbxo22</i>  | - | + |
| <i>Fbxo28</i>  | - | + |
| <i>Fbxo33</i>  | - | + |
| <i>Fbxo36</i>  | - | + |
| <i>Fbxo38</i>  | - | + |
| <i>Fbxo4</i>   | - | + |
| <i>Fbxo42</i>  | - | + |
| <i>Fbxo45</i>  | - | + |
| <i>Fbxo47</i>  | - | + |
| <i>Fbxo48</i>  | - | + |
| <i>Fbxo5</i>   | - | + |
| <i>Fbxo6</i>   | - | + |
| <i>Fbxo8</i>   | - | + |
| <i>Fbxo9</i>   | - | + |
| <i>Fbxw11</i>  | - | + |
| <i>Fbxw17</i>  | - | + |
| <i>Fbxw2</i>   | - | + |
| <i>Fbxw5</i>   | - | + |
| <i>Fbxw7</i>   | - | + |
| <i>Fbxw8</i>   | - | + |
| <i>Fcer2a</i>  | - | + |
| <i>Fcf1</i>    | - | + |
| <i>Fcgr2b</i>  | - | + |
| <i>Fcho1</i>   | - | + |
| <i>Fcho2</i>   | - | + |
| <i>Fchsd1</i>  | - | + |
| <i>Fchsd2</i>  | - | + |
| <i>Fcrl1</i>   | - | + |
| <i>Fcrla</i>   | - | + |
| <i>Fdft1</i>   | - | + |
| <i>Fdps</i>    | - | + |
| <i>Fdx1l</i>   | - | + |
| <i>Fdxacb1</i> | - | + |
| <i>Fdxr</i>    | - | + |
| <i>Fech</i>    | - | + |
| <i>Fem1a</i>   | - | + |
| <i>Fem1b</i>   | - | + |
| <i>Fem1c</i>   | - | + |
| <i>Fen1</i>    | - | + |
| <i>Fermt3</i>  | - | + |

|                 |   |   |
|-----------------|---|---|
| <i>Fes</i>      | - | + |
| <i>Fgd3</i>     | - | + |
| <i>Fgd6</i>     | - | + |
| <i>Fgfr1op2</i> | - | + |
| <i>Fgl2</i>     | - | + |
| <i>Fh1</i>      | - | + |
| <i>Fhit</i>     | - | + |
| <i>Fhl3</i>     | - | + |
| <i>Fhl4</i>     | - | + |
| <i>Fibp</i>     | - | + |
| <i>Ficd</i>     | - | + |
| <i>Fig4</i>     | - | + |
| <i>Figl1</i>    | - | + |
| <i>Filip1l</i>  | - | + |
| <i>Fip1l1</i>   | - | + |
| <i>Fis1</i>     | - | + |
| <i>Fiz1</i>     | - | + |
| <i>Fkbp15</i>   | - | + |
| <i>Fkbp1a</i>   | - | + |
| <i>Fkbp2</i>    | - | + |
| <i>Fkbp3</i>    | - | + |
| <i>Fkbp4</i>    | - | + |
| <i>Fkbp7</i>    | - | + |
| <i>Fkbp8</i>    | - | + |
| <i>Fkrp</i>     | - | + |
| <i>Fktn</i>     | - | + |
| <i>Flad1</i>    | - | + |
| <i>Flcn</i>     | - | + |
| <i>Flna</i>     | - | + |
| <i>Flnb</i>     | - | + |
| <i>Flt3</i>     | - | + |
| <i>Flt3l</i>    | - | + |
| <i>Flywch1</i>  | - | + |
| <i>Fmnl1</i>    | - | + |
| <i>Fmr1</i>     | - | + |
| <i>Fnbp1</i>    | - | + |
| <i>Fnbp4</i>    | - | + |
| <i>Fnta</i>     | - | + |
| <i>Focad</i>    | - | + |
| <i>Folr1</i>    | - | + |
| <i>Foxh1</i>    | - | + |
| <i>Foxj2</i>    | - | + |
| <i>Foxj3</i>    | - | + |
| <i>Foxk1</i>    | - | + |
| <i>Foxk2</i>    | - | + |
| <i>Foxm1</i>    | - | + |
| <i>Foxo1</i>    | - | + |
| <i>Foxo4</i>    | - | + |
| <i>Foxred1</i>  | - | + |
| <i>Foxred2</i>  | - | + |
| <i>Fpgs</i>     | - | + |
| <i>Fpgt</i>     | - | + |
| <i>Frmd8</i>    | - | + |

|                   |   |   |
|-------------------|---|---|
| <i>Frs2</i>       | - | + |
| <i>Fryl</i>       | - | + |
| <i>Fsip1</i>      | - | + |
| <i>Fth1</i>       | - | + |
| <i>Ftl1</i>       | - | + |
| <i>Fto</i>        | - | + |
| <i>Ftsj1</i>      | - | + |
| <i>Ftsj2</i>      | - | + |
| <i>Ftsj3</i>      | - | + |
| <i>Ftsjd1</i>     | - | + |
| <i>Ftsjd2</i>     | - | + |
| <i>Fubp1</i>      | - | + |
| <i>Fuca1</i>      | - | + |
| <i>Fuca2</i>      | - | + |
| <i>Fuk</i>        | - | + |
| <i>Fundc2</i>     | - | + |
| <i>Fus</i>        | - | + |
| <i>Fut11</i>      | - | + |
| <i>Fut4</i>       | - | + |
| <i>Fut8</i>       | - | + |
| <i>Fuz</i>        | - | + |
| <i>Fv1</i>        | - | + |
| <i>Fxn</i>        | - | + |
| <i>Fxr2</i>       | - | + |
| <i>Fyco1</i>      | - | + |
| <i>Fyttd1</i>     | - | + |
| <i>Fzr1</i>       | - | + |
| <i>G3bp1</i>      | - | + |
| <i>G3bp2</i>      | - | + |
| <i>G6pc3</i>      | - | + |
| <i>G6pdx</i>      | - | + |
| <i>Gaa</i>        | - | + |
| <i>Gabarap</i>    | - | + |
| <i>Gabarapl2</i>  | - | + |
| <i>Gabpa</i>      | - | + |
| <i>Gabpb1</i>     | - | + |
| <i>Gabpb2</i>     | - | + |
| <i>Gadd45b</i>    | - | + |
| <i>Gadd45gip1</i> | - | + |
| <i>Gak</i>        | - | + |
| <i>Gale</i>       | - | + |
| <i>Galk1</i>      | - | + |
| <i>Galk2</i>      | - | + |
| <i>Galns</i>      | - | + |
| <i>Galnt1</i>     | - | + |
| <i>Galnt10</i>    | - | + |
| <i>Galnt4</i>     | - | + |
| <i>Galnt6</i>     | - | + |
| <i>Galnt7</i>     | - | + |
| <i>Galt</i>       | - | + |
| <i>Gamt</i>       | - | + |
| <i>Gan</i>        | - | + |
| <i>Ganab</i>      | - | + |

|                |   |   |
|----------------|---|---|
| <i>Ganc</i>    | - | + |
| <i>Gapdh</i>   | - | + |
| <i>Gars</i>    | - | + |
| <i>Gart</i>    | - | + |
| <i>Gas2</i>    | - | + |
| <i>Gas5</i>    | - | + |
| <i>Gatad1</i>  | - | + |
| <i>Gatad2a</i> | - | + |
| <i>Gatc</i>    | - | + |
| <i>Gba2</i>    | - | + |
| <i>Gbas</i>    | - | + |
| <i>Gbp3</i>    | - | + |
| <i>Gbp5</i>    | - | + |
| <i>Gcc1</i>    | - | + |
| <i>Gcc2</i>    | - | + |
| <i>Gcfc2</i>   | - | + |
| <i>Gch1</i>    | - | + |
| <i>Gclc</i>    | - | + |
| <i>Gcn11</i>   | - | + |
| <i>Gcnt1</i>   | - | + |
| <i>Gcsam</i>   | - | + |
| <i>Gdap2</i>   | - | + |
| <i>Gdi1</i>    | - | + |
| <i>Gdi2</i>    | - | + |
| <i>Gdpgp1</i>  | - | + |
| <i>Gem</i>     | - | + |
| <i>Gemin2</i>  | - | + |
| <i>Gemin4</i>  | - | + |
| <i>Gemin5</i>  | - | + |
| <i>Gemin6</i>  | - | + |
| <i>Gemin7</i>  | - | + |
| <i>Gemin8</i>  | - | + |
| <i>Gen1</i>    | - | + |
| <i>Get4</i>    | - | + |
| <i>Gfm1</i>    | - | + |
| <i>Gfm2</i>    | - | + |
| <i>Gfod2</i>   | - | + |
| <i>Gfpt1</i>   | - | + |
| <i>Gga1</i>    | - | + |
| <i>Gga2</i>    | - | + |
| <i>Gga3</i>    | - | + |
| <i>Ggact</i>   | - | + |
| <i>Ggct</i>    | - | + |
| <i>Ggcx</i>    | - | + |
| <i>Ggnbp1</i>  | - | + |
| <i>Ggnbp2</i>  | - | + |
| <i>Ggps1</i>   | - | + |
| <i>Ggta1</i>   | - | + |
| <i>Ghdc</i>    | - | + |
| <i>Ghitm</i>   | - | + |
| <i>Gid4</i>    | - | + |
| <i>Gid8</i>    | - | + |
| <i>Gigyf2</i>  | - | + |

|                |   |   |
|----------------|---|---|
| <i>Gimap1</i>  | - | + |
| <i>Gimap3</i>  | - | + |
| <i>Gimap4</i>  | - | + |
| <i>Gimap5</i>  | - | + |
| <i>Gimap6</i>  | - | + |
| <i>Gimap8</i>  | - | + |
| <i>Gimap9</i>  | - | + |
| <i>Gin1</i>    | - | + |
| <i>Ginm1</i>   | - | + |
| <i>Gins2</i>   | - | + |
| <i>Gins3</i>   | - | + |
| <i>Gins4</i>   | - | + |
| <i>Gipc1</i>   | - | + |
| <i>Gipc3</i>   | - | + |
| <i>Git2</i>    | - | + |
| <i>Gk5</i>     | - | + |
| <i>Gla</i>     | - | + |
| <i>Glb1</i>    | - | + |
| <i>Glcci1</i>  | - | + |
| <i>Gle1</i>    | - | + |
| <i>Glg1</i>    | - | + |
| <i>Glpr1</i>   | - | + |
| <i>Glmn</i>    | - | + |
| <i>Glo1</i>    | - | + |
| <i>Glod4</i>   | - | + |
| <i>Glrx</i>    | - | + |
| <i>Glrx3</i>   | - | + |
| <i>Glrx5</i>   | - | + |
| <i>Glt25d1</i> | - | + |
| <i>Glt8d1</i>  | - | + |
| <i>Gltp</i>    | - | + |
| <i>Gltpd1</i>  | - | + |
| <i>Gltscr2</i> | - | + |
| <i>Glud1</i>   | - | + |
| <i>Glyctk</i>  | - | + |
| <i>Glyr1</i>   | - | + |
| <i>Gm10033</i> | - | + |
| <i>Gm10052</i> | - | + |
| <i>Gm10069</i> | - | + |
| <i>Gm10094</i> | - | + |
| <i>Gm10125</i> | - | + |
| <i>Gm10373</i> | - | + |
| <i>Gm10433</i> | - | + |
| <i>Gm10451</i> | - | + |
| <i>Gm10474</i> | - | + |
| <i>Gm10516</i> | - | + |
| <i>Gm10548</i> | - | + |
| <i>Gm10584</i> | - | + |
| <i>Gm10658</i> | - | + |
| <i>Gm10767</i> | - | + |
| <i>Gm10785</i> | - | + |
| <i>Gm11110</i> | - | + |
| <i>Gm11602</i> | - | + |

|         |   |   |
|---------|---|---|
| Gm11648 | - | + |
| Gm11696 | - | + |
| Gm11974 | - | + |
| Gm12191 | - | + |
| Gm12216 | - | + |
| Gm12250 | - | + |
| Gm12359 | - | + |
| Gm12522 | - | + |
| Gm12669 | - | + |
| Gm12942 | - | + |
| Gm13157 | - | + |
| Gm13286 | - | + |
| Gm13845 | - | + |
| Gm14005 | - | + |
| Gm14164 | - | + |
| Gm14634 | - | + |
| Gm15133 | - | + |
| Gm15408 | - | + |
| Gm15545 | - | + |
| Gm15612 | - | + |
| Gm15663 | - | + |
| Gm15760 | - | + |
| Gm15787 | - | + |
| Gm15800 | - | + |
| Gm15850 | - | + |
| Gm15987 | - | + |
| Gm16023 | - | + |
| Gm16039 | - | + |
| Gm16062 | - | + |
| Gm16119 | - | + |
| Gm16515 | - | + |
| Gm16516 | - | + |
| Gm16576 | - | + |
| Gm166   | - | + |
| Gm16675 | - | + |
| Gm16796 | - | + |
| Gm16845 | - | + |
| Gm16853 | - | + |
| Gm16861 | - | + |
| Gm16894 | - | + |
| Gm16897 | - | + |
| Gm16938 | - | + |
| Gm1720  | - | + |
| Gm17296 | - | + |
| Gm19705 | - | + |
| Gm19710 | - | + |
| Gm1976  | - | + |
| Gm2011  | - | + |
| Gm20139 | - | + |
| Gm20257 | - | + |
| Gm2027  | - | + |
| Gm20324 | - | + |
| Gm20337 | - | + |

|         |   |   |
|---------|---|---|
| Gm20604 | - | + |
| Gm20605 | - | + |
| Gm20753 | - | + |
| Gm2518  | - | + |
| Gm2a    | - | + |
| Gm3230  | - | + |
| Gm4285  | - | + |
| Gm4532  | - | + |
| Gm4890  | - | + |
| Gm4944  | - | + |
| Gm5069  | - | + |
| Gm5113  | - | + |
| Gm5129  | - | + |
| Gm5134  | - | + |
| Gm5141  | - | + |
| Gm5464  | - | + |
| Gm5468  | - | + |
| Gm5506  | - | + |
| Gm5595  | - | + |
| Gm561   | - | + |
| Gm5643  | - | + |
| Gm6034  | - | + |
| Gm608   | - | + |
| Gm6225  | - | + |
| Gm6297  | - | + |
| Gm6377  | - | + |
| Gm6644  | - | + |
| Gm6787  | - | + |
| Gm6793  | - | + |
| Gm7008  | - | + |
| Gm711   | - | + |
| Gm7120  | - | + |
| Gm7334  | - | + |
| Gm7367  | - | + |
| Gm9054  | - | + |
| Gm9776  | - | + |
| Gm9846  | - | + |
| Gm9855  | - | + |
| Gm9897  | - | + |
| Gm9958  | - | + |
| Gmcl1   | - | + |
| Gmcs    | - | + |
| Gmeb1   | - | + |
| Gmeb2   | - | + |
| Gmfb    | - | + |
| Gmfg    | - | + |
| Gmip    | - | + |
| Gmnn    | - | + |
| Gmppa   | - | + |
| Gmppb   | - | + |
| Gmpr2   | - | + |
| Gna11   | - | + |
| Gna13   | - | + |



|                 |   |   |
|-----------------|---|---|
| <i>Gna15</i>    | - | + |
| <i>Gnai2</i>    | - | + |
| <i>Gnai3</i>    | - | + |
| <i>Gnaq</i>     | - | + |
| <i>Gnaz</i>     | - | + |
| <i>Gnb1</i>     | - | + |
| <i>Gnb1l</i>    | - | + |
| <i>Gnb2l1</i>   | - | + |
| <i>Gng10</i>    | - | + |
| <i>Gng2</i>     | - | + |
| <i>Gng3</i>     | - | + |
| <i>Gng5</i>     | - | + |
| <i>Gngt2</i>    | - | + |
| <i>Gnl1</i>     | - | + |
| <i>Gnl3</i>     | - | + |
| <i>Gnl3l</i>    | - | + |
| <i>Gnpat</i>    | - | + |
| <i>Gnpda1</i>   | - | + |
| <i>Gnpnat1</i>  | - | + |
| <i>Gnptab</i>   | - | + |
| <i>Gnptg</i>    | - | + |
| <i>Gns</i>      | - | + |
| <i>Golga1</i>   | - | + |
| <i>Golga2</i>   | - | + |
| <i>Golga3</i>   | - | + |
| <i>Golga4</i>   | - | + |
| <i>Golga5</i>   | - | + |
| <i>Golga7</i>   | - | + |
| <i>Golt1b</i>   | - | + |
| <i>Gopc</i>     | - | + |
| <i>Gorab</i>    | - | + |
| <i>Gorasp1</i>  | - | + |
| <i>Gosr2</i>    | - | + |
| <i>Got2</i>     | - | + |
| <i>Gpaa1</i>    | - | + |
| <i>Gpatch11</i> | - | + |
| <i>Gpatch3</i>  | - | + |
| <i>Gpbp1l1</i>  | - | + |
| <i>Gpcpd1</i>   | - | + |
| <i>Gpd1l</i>    | - | + |
| <i>Gpd2</i>     | - | + |
| <i>Gphn</i>     | - | + |
| <i>Gpi1</i>     | - | + |
| <i>Gpkow</i>    | - | + |
| <i>Gpm6a</i>    | - | + |
| <i>Gpn2</i>     | - | + |
| <i>Gpn3</i>     | - | + |
| <i>Gpr107</i>   | - | + |
| <i>Gpr137c</i>  | - | + |
| <i>Gpr146</i>   | - | + |
| <i>Gpr155</i>   | - | + |
| <i>Gpr174</i>   | - | + |
| <i>Gpr18</i>    | - | + |

|                      |   |   |
|----------------------|---|---|
| <i>Gpr183</i>        | - | + |
| <i>Gprasp1</i>       | - | + |
| <i>Gps1</i>          | - | + |
| <i>Gps2</i>          | - | + |
| <i>Gpsm1</i>         | - | + |
| <i>Gpx1</i>          | - | + |
| <i>Gpx4</i>          | - | + |
| <i>Gramd1a</i>       | - | + |
| <i>Gramd1b</i>       | - | + |
| <i>Gramd1c</i>       | - | + |
| <i>Gramd3</i>        | - | + |
| <i>Gramd4</i>        | - | + |
| <i>Grap</i>          | - | + |
| <i>Grb2</i>          | - | + |
| <i>Grcc10</i>        | - | + |
| <i>Grhl1</i>         | - | + |
| <i>Grhpr</i>         | - | + |
| <i>Grina</i>         | - | + |
| <i>Gripap1</i>       | - | + |
| <i>Grk4</i>          | - | + |
| <i>Grk6</i>          | - | + |
| <i>Grm6</i>          | - | + |
| <i>Grn</i>           | - | + |
| <i>Grpel1</i>        | - | + |
| <i>Grpel2</i>        | - | + |
| <i>Grsf1</i>         | - | + |
| <i>Gsdmd</i>         | - | + |
| <i>Gsk3a</i>         | - | + |
| <i>Gsk3b</i>         | - | + |
| <i>Gskip</i>         | - | + |
| <i>Gss</i>           | - | + |
| <i>Gstcd</i>         | - | + |
| <i>Gstm4</i>         | - | + |
| <i>Gstp1</i>         | - | + |
| <i>Gstt1</i>         | - | + |
| <i>Gstt2</i>         | - | + |
| <i>Gstt3</i>         | - | + |
| <i>Gstz1</i>         | - | + |
| <i>Gt(ROSA)26Sor</i> | - | + |
| <i>Gtf2a1</i>        | - | + |
| <i>Gtf2a2</i>        | - | + |
| <i>Gtf2b</i>         | - | + |
| <i>Gtf2e1</i>        | - | + |
| <i>Gtf2f1</i>        | - | + |
| <i>Gtf2f2</i>        | - | + |
| <i>Gtf2h1</i>        | - | + |
| <i>Gtf2h3</i>        | - | + |
| <i>Gtf2h4</i>        | - | + |
| <i>Gtf2h5</i>        | - | + |
| <i>Gtf2ird2</i>      | - | + |
| <i>Gtf3a</i>         | - | + |
| <i>Gtf3c1</i>        | - | + |
| <i>Gtf3c2</i>        | - | + |

|                |   |   |
|----------------|---|---|
| <i>Gtf3c4</i>  | - | + |
| <i>Gtf3c5</i>  | - | + |
| <i>Gtf3c6</i>  | - | + |
| <i>Gtl3</i>    | - | + |
| <i>Gtpbp1</i>  | - | + |
| <i>Gtpbp2</i>  | - | + |
| <i>Gtpbp3</i>  | - | + |
| <i>Gtpbp5</i>  | - | + |
| <i>Gtpbp6</i>  | - | + |
| <i>Gtse1</i>   | - | + |
| <i>Gucd1</i>   | - | + |
| <i>Guf1</i>    | - | + |
| <i>Gusb</i>    | - | + |
| <i>Gxylt1</i>  | - | + |
| <i>Gyg</i>     | - | + |
| <i>Gyk</i>     | - | + |
| <i>Gypc</i>    | - | + |
| <i>Gys1</i>    | - | + |
| <i>Gzf1</i>    | - | + |
| <i>H2-Aa</i>   | - | + |
| <i>H2-Ab1</i>  | - | + |
| <i>H2-D1</i>   | - | + |
| <i>H2-DMa</i>  | - | + |
| <i>H2-DMb2</i> | - | + |
| <i>H2-Eb1</i>  | - | + |
| <i>H2-Eb2</i>  | - | + |
| <i>H2-K2</i>   | - | + |
| <i>H2-Ke2</i>  | - | + |
| <i>H2-Ke6</i>  | - | + |
| <i>H2-L</i>    | - | + |
| <i>H2-M3</i>   | - | + |
| <i>H2-Oa</i>   | - | + |
| <i>H2-Ob</i>   | - | + |
| <i>H2-Q6</i>   | - | + |
| <i>H2-Q7</i>   | - | + |
| <i>H2-Q8</i>   | - | + |
| <i>H2-Q9</i>   | - | + |
| <i>H2-T22</i>  | - | + |
| <i>H2-T23</i>  | - | + |
| <i>H2-T24</i>  | - | + |
| <i>H2-T9</i>   | - | + |
| <i>H2afj</i>   | - | + |
| <i>H2afv</i>   | - | + |
| <i>H2afx</i>   | - | + |
| <i>H2afz</i>   | - | + |
| <i>H3f3a</i>   | - | + |
| <i>Haa0</i>    | - | + |
| <i>Hace1</i>   | - | + |
| <i>Hacl1</i>   | - | + |
| <i>Hadh</i>    | - | + |
| <i>Hadha</i>   | - | + |
| <i>Hadhb</i>   | - | + |
| <i>Haghl</i>   | - | + |

|                |   |   |
|----------------|---|---|
| <i>Harbi1</i>  | - | + |
| <i>Hars</i>    | - | + |
| <i>Hars2</i>   | - | + |
| <i>Hat1</i>    | - | + |
| <i>Haus1</i>   | - | + |
| <i>Haus2</i>   | - | + |
| <i>Haus3</i>   | - | + |
| <i>Haus7</i>   | - | + |
| <i>Haus8</i>   | - | + |
| <i>Havcr1</i>  | - | + |
| <i>Hax1</i>    | - | + |
| <i>Hbs1l</i>   | - | + |
| <i>Hccs</i>    | - | + |
| <i>Hcfc1</i>   | - | + |
| <i>Hcfc2</i>   | - | + |
| <i>Hcls1</i>   | - | + |
| <i>Hcst</i>    | - | + |
| <i>Hdac1</i>   | - | + |
| <i>Hdac10</i>  | - | + |
| <i>Hdac11</i>  | - | + |
| <i>Hdac3</i>   | - | + |
| <i>Hdac6</i>   | - | + |
| <i>Hdac7</i>   | - | + |
| <i>Hdac8</i>   | - | + |
| <i>Hdac9</i>   | - | + |
| <i>Hddc3</i>   | - | + |
| <i>Hdgf</i>    | - | + |
| <i>Hdgfrp2</i> | - | + |
| <i>Hdhd2</i>   | - | + |
| <i>Hdhd3</i>   | - | + |
| <i>Hdlbp</i>   | - | + |
| <i>Heatr2</i>  | - | + |
| <i>Heatr3</i>  | - | + |
| <i>Heatr5a</i> | - | + |
| <i>Heatr5b</i> | - | + |
| <i>Heca</i>    | - | + |
| <i>Hectd1</i>  | - | + |
| <i>Hectd3</i>  | - | + |
| <i>Heg1</i>    | - | + |
| <i>Helb</i>    | - | + |
| <i>Hells</i>   | - | + |
| <i>Helq</i>    | - | + |
| <i>Helz2</i>   | - | + |
| <i>Herc2</i>   | - | + |
| <i>Herc3</i>   | - | + |
| <i>Herc4</i>   | - | + |
| <i>Herc6</i>   | - | + |
| <i>Herpud1</i> | - | + |
| <i>Herpud2</i> | - | + |
| <i>Hes6</i>    | - | + |
| <i>Hexa</i>    | - | + |
| <i>Hexb</i>    | - | + |
| <i>Hexdc</i>   | - | + |

|                   |   |   |
|-------------------|---|---|
| <i>Hexim2</i>     | - | + |
| <i>Hfe</i>        | - | + |
| <i>Hgs</i>        | - | + |
| <i>Hgsnat</i>     | - | + |
| <i>Hiat1</i>      | - | + |
| <i>Hiatl1</i>     | - | + |
| <i>Hibadh</i>     | - | + |
| <i>Hibch</i>      | - | + |
| <i>Hif1a</i>      | - | + |
| <i>Hif3a</i>      | - | + |
| <i>Higd1a</i>     | - | + |
| <i>Higd2a</i>     | - | + |
| <i>Hintp</i>      | - | + |
| <i>Hint1</i>      | - | + |
| <i>Hint3</i>      | - | + |
| <i>Hip1r</i>      | - | + |
| <i>Hipk3</i>      | - | + |
| <i>Hira</i>       | - | + |
| <i>Hirip3</i>     | - | + |
| <i>Hist1h1a</i>   | - | + |
| <i>Hist1h1b</i>   | - | + |
| <i>Hist1h1c</i>   | - | + |
| <i>Hist1h1d</i>   | - | + |
| <i>Hist1h2ac</i>  | - | + |
| <i>Hist1h2af</i>  | - | + |
| <i>Hist1h2bc</i>  | - | + |
| <i>Hist1h2bh</i>  | - | + |
| <i>Hist1h3a</i>   | - | + |
| <i>Hist1h3e</i>   | - | + |
| <i>Hist1h3f</i>   | - | + |
| <i>Hist1h3g</i>   | - | + |
| <i>Hist1h4a</i>   | - | + |
| <i>Hist1h4h</i>   | - | + |
| <i>Hist1h4k</i>   | - | + |
| <i>Hist2h2aa1</i> | - | + |
| <i>Hist2h2aa2</i> | - | + |
| <i>Hist2h2ab</i>  | - | + |
| <i>Hist2h2ac</i>  | - | + |
| <i>Hist2h2bb</i>  | - | + |
| <i>Hist2h2be</i>  | - | + |
| <i>Hist2h3b</i>   | - | + |
| <i>Hist2h3c1</i>  | - | + |
| <i>Hist2h4</i>    | - | + |
| <i>Hist4h4</i>    | - | + |
| <i>Hivep1</i>     | - | + |
| <i>Hivep2</i>     | - | + |
| <i>Hk1</i>        | - | + |
| <i>Hk3</i>        | - | + |
| <i>Hltf</i>       | - | + |
| <i>Hmbs</i>       | - | + |
| <i>Hmg20a</i>     | - | + |
| <i>Hmg20b</i>     | - | + |
| <i>Hmgb1</i>      | - | + |

|                  |   |   |
|------------------|---|---|
| <i>Hmgb2</i>     | - | + |
| <i>Hmgb3</i>     | - | + |
| <i>Hmgcl</i>     | - | + |
| <i>Hmgcr</i>     | - | + |
| <i>Hmgn1</i>     | - | + |
| <i>Hmgn2</i>     | - | + |
| <i>Hmgn5</i>     | - | + |
| <i>Hmgxb3</i>    | - | + |
| <i>Hmha1</i>     | - | + |
| <i>Hmmr</i>      | - | + |
| <i>Hmox2</i>     | - | + |
| <i>Hn1</i>       | - | + |
| <i>Hn1l</i>      | - | + |
| <i>Hnrnpa0</i>   | - | + |
| <i>Hnrnpa1</i>   | - | + |
| <i>Hnrnpa2b1</i> | - | + |
| <i>Hnrnpa3</i>   | - | + |
| <i>Hnrnpab</i>   | - | + |
| <i>Hnrnpc</i>    | - | + |
| <i>Hnrnpd</i>    | - | + |
| <i>Hnrnpf</i>    | - | + |
| <i>Hnrnph1</i>   | - | + |
| <i>Hnrnph2</i>   | - | + |
| <i>Hnrnph3</i>   | - | + |
| <i>Hnrnpk</i>    | - | + |
| <i>Hnrnpl</i>    | - | + |
| <i>Hnrnpm</i>    | - | + |
| <i>Hnrnpr</i>    | - | + |
| <i>Hnrnpu</i>    | - | + |
| <i>Hnrnpul1</i>  | - | + |
| <i>Hnrnpul2</i>  | - | + |
| <i>Hnrpdl</i>    | - | + |
| <i>Homez</i>     | - | + |
| <i>Hook2</i>     | - | + |
| <i>Hook3</i>     | - | + |
| <i>Hp1bp3</i>    | - | + |
| <i>Hpdl</i>      | - | + |
| <i>Hpgds</i>     | - | + |
| <i>Hprt</i>      | - | + |
| <i>Hps1</i>      | - | + |
| <i>Hps3</i>      | - | + |
| <i>Hps4</i>      | - | + |
| <i>Hps5</i>      | - | + |
| <i>Hps6</i>      | - | + |
| <i>Hpse</i>      | - | + |
| <i>Hras1</i>     | - | + |
| <i>Hrsp12</i>    | - | + |
| <i>Hs2st1</i>    | - | + |
| <i>Hs6st1</i>    | - | + |
| <i>Hsbp1</i>     | - | + |
| <i>Hscb</i>      | - | + |
| <i>Hsd17b4</i>   | - | + |
| <i>Hsd17b7</i>   | - | + |

|                 |   |   |
|-----------------|---|---|
| <i>Hsd3b7</i>   | - | + |
| <i>Hsd12</i>    | - | + |
| <i>Hsf1</i>     | - | + |
| <i>Hsf2bp</i>   | - | + |
| <i>Hsh2d</i>    | - | + |
| <i>Hsp90aa1</i> | - | + |
| <i>Hsp90ab1</i> | - | + |
| <i>Hsp90b1</i>  | - | + |
| <i>Hspa13</i>   | - | + |
| <i>Hspa14</i>   | - | + |
| <i>Hspa4</i>    | - | + |
| <i>Hspa5</i>    | - | + |
| <i>Hspa8</i>    | - | + |
| <i>Hspa9</i>    | - | + |
| <i>Hspb11</i>   | - | + |
| <i>Hspb6</i>    | - | + |
| <i>Hspb9</i>    | - | + |
| <i>Hspd1</i>    | - | + |
| <i>Hspe1</i>    | - | + |
| <i>Hsph1</i>    | - | + |
| <i>Htatip2</i>  | - | + |
| <i>Htatsf1</i>  | - | + |
| <i>Htra2</i>    | - | + |
| <i>Hus1</i>     | - | + |
| <i>Huwe1</i>    | - | + |
| <i>Hvcn1</i>    | - | + |
| <i>Hyal2</i>    | - | + |
| <i>Hyal3</i>    | - | + |
| <i>Hyou1</i>    | - | + |
| <i>Hypk</i>     | - | + |
| <i>Iah1</i>     | - | + |
| <i>Iars</i>     | - | + |
| <i>Iars2</i>    | - | + |
| <i>Iba57</i>    | - | + |
| <i>Icam1</i>    | - | + |
| <i>Ick</i>      | - | + |
| <i>Ict1</i>     | - | + |
| <i>Idh2</i>     | - | + |
| <i>Idh3a</i>    | - | + |
| <i>Idh3b</i>    | - | + |
| <i>Idh3g</i>    | - | + |
| <i>Idi1</i>     | - | + |
| <i>Ido1</i>     | - | + |
| <i>Ids</i>      | - | + |
| <i>Ier2</i>     | - | + |
| <i>Ier3ip1</i>  | - | + |
| <i>Ier5</i>     | - | + |
| <i>Iffo1</i>    | - | + |
| <i>Ifi30</i>    | - | + |
| <i>Ifi47</i>    | - | + |
| <i>Ifih1</i>    | - | + |
| <i>Ifnar1</i>   | - | + |
| <i>Ifnar2</i>   | - | + |

|                |   |   |
|----------------|---|---|
| <i>lfngr1</i>  | - | + |
| <i>lfngr2</i>  | - | + |
| <i>lfrd1</i>   | - | + |
| <i>lfrd2</i>   | - | + |
| <i>lft122</i>  | - | + |
| <i>lft140</i>  | - | + |
| <i>lft20</i>   | - | + |
| <i>lft27</i>   | - | + |
| <i>lft46</i>   | - | + |
| <i>lft74</i>   | - | + |
| <i>lft80</i>   | - | + |
| <i>lgbp1</i>   | - | + |
| <i>lgf2r</i>   | - | + |
| <i>lgflr1</i>  | - | + |
| <i>lghmbp2</i> | - | + |
| <i>lgj</i>     | - | + |
| <i>lgsf8</i>   | - | + |
| <i>lgsf9</i>   | - | + |
| <i>lgtp</i>    | - | + |
| <i>lk</i>      | - | + |
| <i>lkbip</i>   | - | + |
| <i>lkbkap</i>  | - | + |
| <i>lkbkg</i>   | - | + |
| <i>lkzf1</i>   | - | + |
| <i>lkzf3</i>   | - | + |
| <i>ll10ra</i>  | - | + |
| <i>ll10rb</i>  | - | + |
| <i>ll12a</i>   | - | + |
| <i>ll15</i>    | - | + |
| <i>ll1r2</i>   | - | + |
| <i>ll1rap</i>  | - | + |
| <i>ll21r</i>   | - | + |
| <i>ll2rg</i>   | - | + |
| <i>ll3ra</i>   | - | + |
| <i>ll4i1</i>   | - | + |
| <i>ll4ra</i>   | - | + |
| <i>ll7</i>     | - | + |
| <i>lldr1</i>   | - | + |
| <i>llf2</i>    | - | + |
| <i>llk</i>     | - | + |
| <i>llkap</i>   | - | + |
| <i>lmp11</i>   | - | + |
| <i>lmp21</i>   | - | + |
| <i>lmp4</i>    | - | + |
| <i>lmpa2</i>   | - | + |
| <i>lmpact</i>  | - | + |
| <i>lmpad1</i>  | - | + |
| <i>lmpdh2</i>  | - | + |
| <i>lncenp</i>  | - | + |
| <i>lnf2</i>    | - | + |
| <i>lng1</i>    | - | + |
| <i>lng2</i>    | - | + |
| <i>lng4</i>    | - | + |



|                 |   |   |
|-----------------|---|---|
| <i>Ing5</i>     | - | + |
| <i>Inip</i>     | - | + |
| <i>Ino80</i>    | - | + |
| <i>Ino80b</i>   | - | + |
| <i>Ino80c</i>   | - | + |
| <i>Ino80d</i>   | - | + |
| <i>Ino80e</i>   | - | + |
| <i>Inpp1</i>    | - | + |
| <i>Inpp5b</i>   | - | + |
| <i>Inpp5d</i>   | - | + |
| <i>Inpp5e</i>   | - | + |
| <i>Inpp5f</i>   | - | + |
| <i>Inpp5k</i>   | - | + |
| <i>Insig1</i>   | - | + |
| <i>Insig2</i>   | - | + |
| <i>Insr</i>     | - | + |
| <i>Ints1</i>    | - | + |
| <i>Ints10</i>   | - | + |
| <i>Ints12</i>   | - | + |
| <i>Ints2</i>    | - | + |
| <i>Ints3</i>    | - | + |
| <i>Ints4</i>    | - | + |
| <i>Ints5</i>    | - | + |
| <i>Ints6</i>    | - | + |
| <i>Ints7</i>    | - | + |
| <i>Ints8</i>    | - | + |
| <i>Invs</i>     | - | + |
| <i>Ip6k1</i>    | - | + |
| <i>Ipmk</i>     | - | + |
| <i>Ipo13</i>    | - | + |
| <i>Ipo4</i>     | - | + |
| <i>Ipo5</i>     | - | + |
| <i>Ipo7</i>     | - | + |
| <i>Ipo8</i>     | - | + |
| <i>Ipo9</i>     | - | + |
| <i>Ipp</i>      | - | + |
| <i>Ippk</i>     | - | + |
| <i>Iqcb1</i>    | - | + |
| <i>Iqcc</i>     | - | + |
| <i>Iqce</i>     | - | + |
| <i>Iqch</i>     | - | + |
| <i>Iqck</i>     | - | + |
| <i>Irak1</i>    | - | + |
| <i>Irak1bp1</i> | - | + |
| <i>Irak2</i>    | - | + |
| <i>Irak4</i>    | - | + |
| <i>Irf2</i>     | - | + |
| <i>Irf2bp1</i>  | - | + |
| <i>Irf2bp2</i>  | - | + |
| <i>Irf3</i>     | - | + |
| <i>Irf5</i>     | - | + |
| <i>Irf8</i>     | - | + |
| <i>Irf9</i>     | - | + |

|                 |   |   |
|-----------------|---|---|
| <i>Irgm2</i>    | - | + |
| <i>Irgq</i>     | - | + |
| <i>Isca1</i>    | - | + |
| <i>Isca2</i>    | - | + |
| <i>Iscu</i>     | - | + |
| <i>Isg20</i>    | - | + |
| <i>Isg20l2</i>  | - | + |
| <i>Isoc2a</i>   | - | + |
| <i>Isoc2b</i>   | - | + |
| <i>Isy1</i>     | - | + |
| <i>Isyna1</i>   | - | + |
| <i>Itch</i>     | - | + |
| <i>Itfg1</i>    | - | + |
| <i>Itfg2</i>    | - | + |
| <i>Itga4</i>    | - | + |
| <i>Itgal</i>    | - | + |
| <i>Itgav</i>    | - | + |
| <i>Itgb1</i>    | - | + |
| <i>Itgb1bp1</i> | - | + |
| <i>Itgb2</i>    | - | + |
| <i>Itgb3bp</i>  | - | + |
| <i>Itih5</i>    | - | + |
| <i>Itm2a</i>    | - | + |
| <i>Itm2b</i>    | - | + |
| <i>Itm2c</i>    | - | + |
| <i>Itpa</i>     | - | + |
| <i>Itpk1</i>    | - | + |
| <i>Itpkb</i>    | - | + |
| <i>Itpkc</i>    | - | + |
| <i>Itpr1</i>    | - | + |
| <i>Itpr2</i>    | - | + |
| <i>Itpr3</i>    | - | + |
| <i>Itprlp</i>   | - | + |
| <i>Itprlp1</i>  | - | + |
| <i>Itsn2</i>    | - | + |
| <i>Ivns1abp</i> | - | + |
| <i>Iws1</i>     | - | + |
| <i>Izumo4</i>   | - | + |
| <i>Jagn1</i>    | - | + |
| <i>Jak1</i>     | - | + |
| <i>Jak3</i>     | - | + |
| <i>Jakmip1</i>  | - | + |
| <i>Jhdm1d</i>   | - | + |
| <i>Jmjd4</i>    | - | + |
| <i>Jmjd6</i>    | - | + |
| <i>Jmjd7</i>    | - | + |
| <i>Jmjd8</i>    | - | + |
| <i>Josd1</i>    | - | + |
| <i>Jpx</i>      | - | + |
| <i>Jrk</i>      | - | + |
| <i>Jtb</i>      | - | + |
| <i>Junb</i>     | - | + |
| <i>Jund</i>     | - | + |

|                 |   |   |
|-----------------|---|---|
| <i>Kansl1</i>   | - | + |
| <i>Kansl1l</i>  | - | + |
| <i>Kansl2</i>   | - | + |
| <i>Kars</i>     | - | + |
| <i>Kat2a</i>    | - | + |
| <i>Kat2b</i>    | - | + |
| <i>Kat7</i>     | - | + |
| <i>Kat8</i>     | - | + |
| <i>Katna1</i>   | - | + |
| <i>Katnal1</i>  | - | + |
| <i>Katnal2</i>  | - | + |
| <i>Katnb1</i>   | - | + |
| <i>Kbtbd3</i>   | - | + |
| <i>Kbtbd4</i>   | - | + |
| <i>Kbtbd7</i>   | - | + |
| <i>Kcmf1</i>    | - | + |
| <i>Kcna3</i>    | - | + |
| <i>Kcnk5</i>    | - | + |
| <i>Kcnk6</i>    | - | + |
| <i>Kcnn4</i>    | - | + |
| <i>Kcnq1ot1</i> | - | + |
| <i>Kcnq5</i>    | - | + |
| <i>Kctd10</i>   | - | + |
| <i>Kctd11</i>   | - | + |
| <i>Kctd13</i>   | - | + |
| <i>Kctd14</i>   | - | + |
| <i>Kctd2</i>    | - | + |
| <i>Kctd20</i>   | - | + |
| <i>Kctd5</i>    | - | + |
| <i>Kctd7</i>    | - | + |
| <i>Kctd9</i>    | - | + |
| <i>Kdelr2</i>   | - | + |
| <i>Kdm1a</i>    | - | + |
| <i>Kdm3b</i>    | - | + |
| <i>Kdm4a</i>    | - | + |
| <i>Kdm4c</i>    | - | + |
| <i>Kdm4d</i>    | - | + |
| <i>Kdm5a</i>    | - | + |
| <i>Kdm6a</i>    | - | + |
| <i>Kdm8</i>     | - | + |
| <i>Kdsr</i>     | - | + |
| <i>Khdrbs1</i>  | - | + |
| <i>Khk</i>      | - | + |
| <i>Khsrp</i>    | - | + |
| <i>Kif11</i>    | - | + |
| <i>Kif13b</i>   | - | + |
| <i>Kif14</i>    | - | + |
| <i>Kif15</i>    | - | + |
| <i>Kif16b</i>   | - | + |
| <i>Kif18a</i>   | - | + |
| <i>Kif20a</i>   | - | + |
| <i>Kif20b</i>   | - | + |
| <i>Kif21b</i>   | - | + |

|                 |   |   |
|-----------------|---|---|
| <i>Kif23</i>    | - | + |
| <i>Kif24</i>    | - | + |
| <i>Kif2a</i>    | - | + |
| <i>Kif2c</i>    | - | + |
| <i>Kif3c</i>    | - | + |
| <i>Kif4</i>     | - | + |
| <i>Kif5b</i>    | - | + |
| <i>Kif9</i>     | - | + |
| <i>Kifap3</i>   | - | + |
| <i>Kifc1</i>    | - | + |
| <i>Kin</i>      | - | + |
| <i>Klc4</i>     | - | + |
| <i>Klf13</i>    | - | + |
| <i>Klf16</i>    | - | + |
| <i>Klf6</i>     | - | + |
| <i>Klf8</i>     | - | + |
| <i>Klhdc1</i>   | - | + |
| <i>Klhdc2</i>   | - | + |
| <i>Klhdc3</i>   | - | + |
| <i>Klhdc4</i>   | - | + |
| <i>Klhdc8b</i>  | - | + |
| <i>Klhdc9</i>   | - | + |
| <i>Klh10</i>    | - | + |
| <i>Klh11</i>    | - | + |
| <i>Klh17</i>    | - | + |
| <i>Klh18</i>    | - | + |
| <i>Klh12</i>    | - | + |
| <i>Klh124</i>   | - | + |
| <i>Klh128</i>   | - | + |
| <i>Klh16</i>    | - | + |
| <i>Kmo</i>      | - | + |
| <i>Kntc1</i>    | - | + |
| <i>Kpna1</i>    | - | + |
| <i>Kpna6</i>    | - | + |
| <i>Kpnb1</i>    | - | + |
| <i>Kptn</i>     | - | + |
| <i>Krcc1</i>    | - | + |
| <i>Krit1</i>    | - | + |
| <i>Krt222</i>   | - | + |
| <i>Krtap1-3</i> | - | + |
| <i>Krtcap2</i>  | - | + |
| <i>Ksr1</i>     | - | + |
| <i>Kti12</i>    | - | + |
| <i>Kxd1</i>     | - | + |
| <i>Kynu</i>     | - | + |
| <i>L2hgdh</i>   | - | + |
| <i>L3mbtl3</i>  | - | + |
| <i>I7Rn6</i>    | - | + |
| <i>Lacc1</i>    | - | + |
| <i>Lace1</i>    | - | + |
| <i>Lactb</i>    | - | + |
| <i>Lactb2</i>   | - | + |
| <i>Lage3</i>    | - | + |

|                |   |   |
|----------------|---|---|
| <i>Lamp1</i>   | - | + |
| <i>Lamp2</i>   | - | + |
| <i>Lamtor1</i> | - | + |
| <i>Lamtor2</i> | - | + |
| <i>Lamtor3</i> | - | + |
| <i>Lamtor4</i> | - | + |
| <i>Lamtor5</i> | - | + |
| <i>Lancl1</i>  | - | + |
| <i>Laptn4a</i> | - | + |
| <i>Laptn5</i>  | - | + |
| <i>Larp1</i>   | - | + |
| <i>Larp4b</i>  | - | + |
| <i>Larp7</i>   | - | + |
| <i>Las1l</i>   | - | + |
| <i>Lasp1</i>   | - | + |
| <i>Lat2</i>    | - | + |
| <i>Lats1</i>   | - | + |
| <i>Lats2</i>   | - | + |
| <i>Lax1</i>    | - | + |
| <i>Lbh</i>     | - | + |
| <i>Lbr</i>     | - | + |
| <i>Lca5</i>    | - | + |
| <i>Lck</i>     | - | + |
| <i>Lcmt2</i>   | - | + |
| <i>Lcp2</i>    | - | + |
| <i>Ldha</i>    | - | + |
| <i>Ldlr</i>    | - | + |
| <i>Ldoc1l</i>  | - | + |
| <i>Lekr1</i>   | - | + |
| <i>Leng1</i>   | - | + |
| <i>Leng8</i>   | - | + |
| <i>Leo1</i>    | - | + |
| <i>Leprot</i>  | - | + |
| <i>Letm1</i>   | - | + |
| <i>Letm2</i>   | - | + |
| <i>Letmd1</i>  | - | + |
| <i>Lgals1</i>  | - | + |
| <i>Lgals9</i>  | - | + |
| <i>Lgmn</i>    | - | + |
| <i>Lias</i>    | - | + |
| <i>Lig1</i>    | - | + |
| <i>Lig3</i>    | - | + |
| <i>Lig4</i>    | - | + |
| <i>Limd1</i>   | - | + |
| <i>Limd2</i>   | - | + |
| <i>Limk2</i>   | - | + |
| <i>Lims1</i>   | - | + |
| <i>Lin37</i>   | - | + |
| <i>Lin54</i>   | - | + |
| <i>Lin9</i>    | - | + |
| <i>Lins</i>    | - | + |
| <i>Lipa</i>    | - | + |
| <i>Lipe</i>    | - | + |

|                     |   |   |
|---------------------|---|---|
| <i>Lipo1</i>        | - | + |
| <i>Lipt2</i>        | - | + |
| <i>Litaf</i>        | - | + |
| <i>Llg1</i>         | - | + |
| <i>Llg2</i>         | - | + |
| <i>Llph</i>         | - | + |
| <i>Lman1</i>        | - | + |
| <i>Lman2</i>        | - | + |
| <i>Lman2l</i>       | - | + |
| <i>Lmbr1l</i>       | - | + |
| <i>Lmbrd2</i>       | - | + |
| <i>Lmf2</i>         | - | + |
| <i>Lmln</i>         | - | + |
| <i>Lmnb1</i>        | - | + |
| <i>Lmo2</i>         | - | + |
| <i>Lmo4</i>         | - | + |
| <i>Lnpep</i>        | - | + |
| <i>Lnx2</i>         | - | + |
| <i>LOC100503496</i> | - | + |
| <i>Loh12cr1</i>     | - | + |
| <i>Lonp1</i>        | - | + |
| <i>Lonp2</i>        | - | + |
| <i>Lox3</i>         | - | + |
| <i>Lpar2</i>        | - | + |
| <i>Lpar5</i>        | - | + |
| <i>Lpar6</i>        | - | + |
| <i>Lpcat1</i>       | - | + |
| <i>Lpcat3</i>       | - | + |
| <i>Lpcat4</i>       | - | + |
| <i>Lpgat1</i>       | - | + |
| <i>Lpin1</i>        | - | + |
| <i>Lpin2</i>        | - | + |
| <i>Lpp</i>          | - | + |
| <i>Lpxn</i>         | - | + |
| <i>Lrch1</i>        | - | + |
| <i>Lrch3</i>        | - | + |
| <i>Lrch4</i>        | - | + |
| <i>Lrdd</i>         | - | + |
| <i>Lrfn4</i>        | - | + |
| <i>Lrig2</i>        | - | + |
| <i>Lrmp</i>         | - | + |
| <i>Lrp10</i>        | - | + |
| <i>Lrp8</i>         | - | + |
| <i>Lrpprc</i>       | - | + |
| <i>Lrrc14</i>       | - | + |
| <i>Lrrc16b</i>      | - | + |
| <i>Lrrc27</i>       | - | + |
| <i>Lrrc29</i>       | - | + |
| <i>Lrrc33</i>       | - | + |
| <i>Lrrc40</i>       | - | + |
| <i>Lrrc41</i>       | - | + |
| <i>Lrrc42</i>       | - | + |
| <i>Lrrc45</i>       | - | + |

|               |   |   |
|---------------|---|---|
| <i>Lrrc47</i> | - | + |
| <i>Lrrc48</i> | - | + |
| <i>Lrrc49</i> | - | + |
| <i>Lrrc51</i> | - | + |
| <i>Lrrc56</i> | - | + |
| <i>Lrrc57</i> | - | + |
| <i>Lrrc59</i> | - | + |
| <i>Lrrc8a</i> | - | + |
| <i>Lrrc8c</i> | - | + |
| <i>Lrrc8d</i> | - | + |
| <i>Lrrfp2</i> | - | + |
| <i>Lrriq3</i> | - | + |
| <i>Lrrk1</i>  | - | + |
| <i>Lrrk2</i>  | - | + |
| <i>Lrsam1</i> | - | + |
| <i>Lrwd1</i>  | - | + |
| <i>Lsm1</i>   | - | + |
| <i>Lsm10</i>  | - | + |
| <i>Lsm11</i>  | - | + |
| <i>Lsm12</i>  | - | + |
| <i>Lsm14a</i> | - | + |
| <i>Lsm2</i>   | - | + |
| <i>Lsm3</i>   | - | + |
| <i>Lsm4</i>   | - | + |
| <i>Lsm7</i>   | - | + |
| <i>Lsmd1</i>  | - | + |
| <i>Lsp1</i>   | - | + |
| <i>Lss</i>    | - | + |
| <i>Lta</i>    | - | + |
| <i>Lta4h</i>  | - | + |
| <i>Ltb</i>    | - | + |
| <i>Ltc4s</i>  | - | + |
| <i>Ltk</i>    | - | + |
| <i>Ltn1</i>   | - | + |
| <i>Ltv1</i>   | - | + |
| <i>Luc7l2</i> | - | + |
| <i>Luc7l3</i> | - | + |
| <i>Lurap1</i> | - | + |
| <i>Lxn</i>    | - | + |
| <i>Ly6e</i>   | - | + |
| <i>Ly75</i>   | - | + |
| <i>Ly86</i>   | - | + |
| <i>Ly9</i>    | - | + |
| <i>Ly96</i>   | - | + |
| <i>Lyar</i>   | - | + |
| <i>Lynx1</i>  | - | + |
| <i>Lypla2</i> | - | + |
| <i>Lym1</i>   | - | + |
| <i>Lym2</i>   | - | + |
| <i>Lym4</i>   | - | + |
| <i>Lym7</i>   | - | + |
| <i>Lym9</i>   | - | + |
| <i>Lysmd1</i> | - | + |

|                 |   |   |
|-----------------|---|---|
| <i>Lysmd3</i>   | - | + |
| <i>Lysmd4</i>   | - | + |
| <i>Lyst</i>     | - | + |
| <i>Lzic</i>     | - | + |
| <i>M6pr</i>     | - | + |
| <i>Mad11</i>    | - | + |
| <i>Mad21</i>    | - | + |
| <i>Mad211bp</i> | - | + |
| <i>Madd</i>     | - | + |
| <i>Maea</i>     | - | + |
| <i>Maf1</i>     | - | + |
| <i>Mafg</i>     | - | + |
| <i>Mafk</i>     | - | + |
| <i>Mageb3</i>   | - | + |
| <i>Maged1</i>   | - | + |
| <i>Magee1</i>   | - | + |
| <i>Magoh</i>    | - | + |
| <i>Magohb</i>   | - | + |
| <i>Mak16</i>    | - | + |
| <i>Malat1</i>   | - | + |
| <i>Malt1</i>    | - | + |
| <i>Maml1</i>    | - | + |
| <i>Man2a1</i>   | - | + |
| <i>Man2a2</i>   | - | + |
| <i>Man2b1</i>   | - | + |
| <i>Man2b2</i>   | - | + |
| <i>Man2c1</i>   | - | + |
| <i>Manba</i>    | - | + |
| <i>Manbal</i>   | - | + |
| <i>Manf</i>     | - | + |
| <i>Maoa</i>     | - | + |
| <i>Map1lc3a</i> | - | + |
| <i>Map1lc3b</i> | - | + |
| <i>Map1s</i>    | - | + |
| <i>Map2k1</i>   | - | + |
| <i>Map2k2</i>   | - | + |
| <i>Map2k3</i>   | - | + |
| <i>Map2k4</i>   | - | + |
| <i>Map2k5</i>   | - | + |
| <i>Map2k6</i>   | - | + |
| <i>Map2k7</i>   | - | + |
| <i>Map3k10</i>  | - | + |
| <i>Map3k11</i>  | - | + |
| <i>Map3k12</i>  | - | + |
| <i>Map3k14</i>  | - | + |
| <i>Map3k2</i>   | - | + |
| <i>Map3k3</i>   | - | + |
| <i>Map3k4</i>   | - | + |
| <i>Map3k5</i>   | - | + |
| <i>Map3k7</i>   | - | + |
| <i>Map4</i>     | - | + |
| <i>Map4k1</i>   | - | + |
| <i>Map4k2</i>   | - | + |



|                  |   |   |
|------------------|---|---|
| <i>Map4k4</i>    | - | + |
| <i>Map4k5</i>    | - | + |
| <i>Map7d1</i>    | - | + |
| <i>Map9</i>      | - | + |
| <i>Mapk14</i>    | - | + |
| <i>Mapk1ip1</i>  | - | + |
| <i>Mapk1ip1l</i> | - | + |
| <i>Mapk3</i>     | - | + |
| <i>Mapk6</i>     | - | + |
| <i>Mapk7</i>     | - | + |
| <i>Mapk8ip3</i>  | - | + |
| <i>Mapk9</i>     | - | + |
| <i>Mapkapk2</i>  | - | + |
| <i>Mapkapk3</i>  | - | + |
| <i>Mapkapk5</i>  | - | + |
| <i>Mapkbp1</i>   | - | + |
| <i>Mapre1</i>    | - | + |
| <i>March1</i>    | - | + |
| <i>March7</i>    | - | + |
| <i>Marcks</i>    | - | + |
| <i>Marcksl1</i>  | - | + |
| <i>Marf1</i>     | - | + |
| <i>Mark2</i>     | - | + |
| <i>Mars</i>      | - | + |
| <i>Marveld2</i>  | - | + |
| <i>Mast3</i>     | - | + |
| <i>Mastl</i>     | - | + |
| <i>Mat2a</i>     | - | + |
| <i>Mat2b</i>     | - | + |
| <i>Matr3</i>     | - | + |
| <i>Mau2</i>      | - | + |
| <i>Max</i>       | - | + |
| <i>Maz</i>       | - | + |
| <i>Mbd1</i>      | - | + |
| <i>Mbd2</i>      | - | + |
| <i>Mbd3</i>      | - | + |
| <i>Mbd4</i>      | - | + |
| <i>Mbd5</i>      | - | + |
| <i>Mbd6</i>      | - | + |
| <i>Mblac1</i>    | - | + |
| <i>Mblac2</i>    | - | + |
| <i>Mbni1</i>     | - | + |
| <i>Mboat7</i>    | - | + |
| <i>Mbp</i>       | - | + |
| <i>Mbtps1</i>    | - | + |
| <i>Mbtps2</i>    | - | + |
| <i>Mcat</i>      | - | + |
| <i>Mccc1</i>     | - | + |
| <i>Mccc2</i>     | - | + |
| <i>Mcee</i>      | - | + |
| <i>Mcl1</i>      | - | + |
| <i>Mcm10</i>     | - | + |
| <i>Mcm2</i>      | - | + |

|               |   |   |
|---------------|---|---|
| <i>Mcm3ap</i> | - | + |
| <i>Mcm4</i>   | - | + |
| <i>Mcm5</i>   | - | + |
| <i>Mcm6</i>   | - | + |
| <i>Mcm7</i>   | - | + |
| <i>Mcm8</i>   | - | + |
| <i>Mcoln1</i> | - | + |
| <i>Mcoln2</i> | - | + |
| <i>Mcph1</i>  | - | + |
| <i>Mcrs1</i>  | - | + |
| <i>Mctp2</i>  | - | + |
| <i>Mcts1</i>  | - | + |
| <i>Mdc1</i>   | - | + |
| <i>Mdfic</i>  | - | + |
| <i>Mdh1</i>   | - | + |
| <i>Mdh1b</i>  | - | + |
| <i>Mdh2</i>   | - | + |
| <i>Mdm1</i>   | - | + |
| <i>Mdm2</i>   | - | + |
| <i>Mdm4</i>   | - | + |
| <i>Mdn1</i>   | - | + |
| <i>Mdp1</i>   | - | + |
| <i>Me2</i>    | - | + |
| <i>Mea1</i>   | - | + |
| <i>Meaf6</i>  | - | + |
| <i>Mecp2</i>  | - | + |
| <i>Med1</i>   | - | + |
| <i>Med10</i>  | - | + |
| <i>Med11</i>  | - | + |
| <i>Med12</i>  | - | + |
| <i>Med14</i>  | - | + |
| <i>Med15</i>  | - | + |
| <i>Med16</i>  | - | + |
| <i>Med17</i>  | - | + |
| <i>Med18</i>  | - | + |
| <i>Med19</i>  | - | + |
| <i>Med20</i>  | - | + |
| <i>Med21</i>  | - | + |
| <i>Med22</i>  | - | + |
| <i>Med23</i>  | - | + |
| <i>Med25</i>  | - | + |
| <i>Med26</i>  | - | + |
| <i>Med28</i>  | - | + |
| <i>Med29</i>  | - | + |
| <i>Med30</i>  | - | + |
| <i>Med31</i>  | - | + |
| <i>Med4</i>   | - | + |
| <i>Med8</i>   | - | + |
| <i>Mef2a</i>  | - | + |
| <i>Mef2b</i>  | - | + |
| <i>Mef2d</i>  | - | + |
| <i>Melk</i>   | - | + |
| <i>Memo1</i>  | - | + |

|                 |   |   |
|-----------------|---|---|
| <i>Men1</i>     | - | + |
| <i>Mepce</i>    | - | + |
| <i>Mesdc1</i>   | - | + |
| <i>Mesdc2</i>   | - | + |
| <i>Metap2</i>   | - | + |
| <i>Mettl10</i>  | - | + |
| <i>Mettl13</i>  | - | + |
| <i>Mettl15</i>  | - | + |
| <i>Mettl17</i>  | - | + |
| <i>Mettl18</i>  | - | + |
| <i>Mettl2</i>   | - | + |
| <i>Mettl20</i>  | - | + |
| <i>Mettl21a</i> | - | + |
| <i>Mettl21d</i> | - | + |
| <i>Mettl22</i>  | - | + |
| <i>Mettl23</i>  | - | + |
| <i>Mettl25</i>  | - | + |
| <i>Mettl3</i>   | - | + |
| <i>Mettl4</i>   | - | + |
| <i>Mettl6</i>   | - | + |
| <i>Mettl7a1</i> | - | + |
| <i>Mettl8</i>   | - | + |
| <i>Mex3c</i>    | - | + |
| <i>Mfap1a</i>   | - | + |
| <i>Mfap1b</i>   | - | + |
| <i>Mfap3</i>    | - | + |
| <i>Mfge8</i>    | - | + |
| <i>Mfn1</i>     | - | + |
| <i>Mfn2</i>     | - | + |
| <i>Mfng</i>     | - | + |
| <i>Mfsd1</i>    | - | + |
| <i>Mfsd10</i>   | - | + |
| <i>Mfsd11</i>   | - | + |
| <i>Mfsd12</i>   | - | + |
| <i>Mfsd2a</i>   | - | + |
| <i>Mfsd3</i>    | - | + |
| <i>Mfsd8</i>    | - | + |
| <i>Mfsd9</i>    | - | + |
| <i>Mgat1</i>    | - | + |
| <i>Mgat2</i>    | - | + |
| <i>Mgat4b</i>   | - | + |
| <i>Mgat5</i>    | - | + |
| <i>Mgea5</i>    | - | + |
| <i>Mgl1</i>     | - | + |
| <i>Mgme1</i>    | - | + |
| <i>Mgrn1</i>    | - | + |
| <i>Mia</i>      | - | + |
| <i>Mical1</i>   | - | + |
| <i>Micall1</i>  | - | + |
| <i>Micu1</i>    | - | + |
| <i>Mid1ip1</i>  | - | + |
| <i>Midn</i>     | - | + |
| <i>Mien1</i>    | - | + |

|                 |   |   |
|-----------------|---|---|
| <i>Mier1</i>    | - | + |
| <i>Mier2</i>    | - | + |
| <i>Mif</i>      | - | + |
| <i>Mif4gd</i>   | - | + |
| <i>Miip</i>     | - | + |
| <i>Milr1</i>    | - | + |
| <i>Mina</i>     | - | + |
| <i>Mink1</i>    | - | + |
| <i>Minos1</i>   | - | + |
| <i>Minpp1</i>   | - | + |
| <i>Mios</i>     | - | + |
| <i>Mipol1</i>   | - | + |
| <i>Mir1196</i>  | - | + |
| <i>Mir130b</i>  | - | + |
| <i>Mir150</i>   | - | + |
| <i>Mir155</i>   | - | + |
| <i>Mir1893</i>  | - | + |
| <i>Mir1894</i>  | - | + |
| <i>Mir191</i>   | - | + |
| <i>Mir1931</i>  | - | + |
| <i>Mir1934</i>  | - | + |
| <i>Mir1938</i>  | - | + |
| <i>Mir1956</i>  | - | + |
| <i>Mir1967</i>  | - | + |
| <i>Mir1982</i>  | - | + |
| <i>Mir207</i>   | - | + |
| <i>Mir21</i>    | - | + |
| <i>Mir219-1</i> | - | + |
| <i>Mir22</i>    | - | + |
| <i>Mir22hg</i>  | - | + |
| <i>Mir2861</i>  | - | + |
| <i>Mir301b</i>  | - | + |
| <i>Mir3069</i>  | - | + |
| <i>Mir3077</i>  | - | + |
| <i>Mir3082</i>  | - | + |
| <i>Mir3086</i>  | - | + |
| <i>Mir3091</i>  | - | + |
| <i>Mir3096</i>  | - | + |
| <i>Mir3096b</i> | - | + |
| <i>Mir345</i>   | - | + |
| <i>Mir3960</i>  | - | + |
| <i>Mir425</i>   | - | + |
| <i>Mir467f</i>  | - | + |
| <i>Mir484</i>   | - | + |
| <i>Mir5103</i>  | - | + |
| <i>Mir5117</i>  | - | + |
| <i>Mir5121</i>  | - | + |
| <i>Mir5132</i>  | - | + |
| <i>Mir5136</i>  | - | + |
| <i>Mir677</i>   | - | + |
| <i>Mir686</i>   | - | + |
| <i>Mir695</i>   | - | + |
| <i>Mir698</i>   | - | + |

|                 |   |   |
|-----------------|---|---|
| <i>Mir707</i>   | - | + |
| <i>Mir718</i>   | - | + |
| <i>Mir760</i>   | - | + |
| <i>Mirlet7i</i> | - | + |
| <i>Mis12</i>    | - | + |
| <i>Mis18a</i>   | - | + |
| <i>Mis18bp1</i> | - | + |
| <i>Mitd1</i>    | - | + |
| <i>Mki67</i>    | - | + |
| <i>Mkks</i>     | - | + |
| <i>Mkl1</i>     | - | + |
| <i>Mkl2</i>     | - | + |
| <i>Mklin1</i>   | - | + |
| <i>Mknk1</i>    | - | + |
| <i>Mkrn2</i>    | - | + |
| <i>Mks1</i>     | - | + |
| <i>Mlec</i>     | - | + |
| <i>Mlf1ip</i>   | - | + |
| <i>Mlf2</i>     | - | + |
| <i>Mlh1</i>     | - | + |
| <i>Mlh3</i>     | - | + |
| <i>Mll3</i>     | - | + |
| <i>Mll5</i>     | - | + |
| <i>Mllt11</i>   | - | + |
| <i>Mllt3</i>    | - | + |
| <i>Mllt6</i>    | - | + |
| <i>Mlxip</i>    | - | + |
| <i>Mmaa</i>     | - | + |
| <i>Mmab</i>     | - | + |
| <i>Mmachc</i>   | - | + |
| <i>Mmd</i>      | - | + |
| <i>Mmgt1</i>    | - | + |
| <i>Mmgt2</i>    | - | + |
| <i>Mms19</i>    | - | + |
| <i>Mms22l</i>   | - | + |
| <i>Mnd1</i>     | - | + |
| <i>Mns1</i>     | - | + |
| <i>Mnt</i>      | - | + |
| <i>Moap1</i>    | - | + |
| <i>Mob1a</i>    | - | + |
| <i>Mob1b</i>    | - | + |
| <i>Mob2</i>     | - | + |
| <i>Mob3a</i>    | - | + |
| <i>Mob3b</i>    | - | + |
| <i>Mob3c</i>    | - | + |
| <i>Mob4</i>     | - | + |
| <i>Mocs1</i>    | - | + |
| <i>Mocs3</i>    | - | + |
| <i>Mogs</i>     | - | + |
| <i>Mon1b</i>    | - | + |
| <i>Morc2a</i>   | - | + |
| <i>Morc3</i>    | - | + |
| <i>Morf4l2</i>  | - | + |

|                  |   |   |
|------------------|---|---|
| <i>Morn1</i>     | - | + |
| <i>Morn2</i>     | - | + |
| <i>Mospd1</i>    | - | + |
| <i>Mospd2</i>    | - | + |
| <i>Mospd3</i>    | - | + |
| <i>Mov10</i>     | - | + |
| <i>Mpc1</i>      | - | + |
| <i>Mpc2</i>      | - | + |
| <i>Mpdu1</i>     | - | + |
| <i>Mphosph10</i> | - | + |
| <i>Mphosph8</i>  | - | + |
| <i>Mphosph9</i>  | - | + |
| <i>Mpi</i>       | - | + |
| <i>Mpnd</i>      | - | + |
| <i>Mpp1</i>      | - | + |
| <i>Mppe1</i>     | - | + |
| <i>Mprip</i>     | - | + |
| <i>Mpst</i>      | - | + |
| <i>Mpv17</i>     | - | + |
| <i>Mpv17l2</i>   | - | + |
| <i>Mre11a</i>    | - | + |
| <i>Mreg</i>      | - | + |
| <i>Mrgbp</i>     | - | + |
| <i>Mrgpre</i>    | - | + |
| <i>Mri1</i>      | - | + |
| <i>Mrm1</i>      | - | + |
| <i>Mroh1</i>     | - | + |
| <i>Mroh8</i>     | - | + |
| <i>Mrp63</i>     | - | + |
| <i>Mrpl1</i>     | - | + |
| <i>Mrpl11</i>    | - | + |
| <i>Mrpl12</i>    | - | + |
| <i>Mrpl13</i>    | - | + |
| <i>Mrpl16</i>    | - | + |
| <i>Mrpl17</i>    | - | + |
| <i>Mrpl18</i>    | - | + |
| <i>Mrpl19</i>    | - | + |
| <i>Mrpl2</i>     | - | + |
| <i>Mrpl21</i>    | - | + |
| <i>Mrpl22</i>    | - | + |
| <i>Mrpl24</i>    | - | + |
| <i>Mrpl27</i>    | - | + |
| <i>Mrpl28</i>    | - | + |
| <i>Mrpl3</i>     | - | + |
| <i>Mrpl30</i>    | - | + |
| <i>Mrpl32</i>    | - | + |
| <i>Mrpl33</i>    | - | + |
| <i>Mrpl34</i>    | - | + |
| <i>Mrpl36</i>    | - | + |
| <i>Mrpl37</i>    | - | + |
| <i>Mrpl38</i>    | - | + |
| <i>Mrpl4</i>     | - | + |
| <i>Mrpl40</i>    | - | + |

|                |   |   |
|----------------|---|---|
| <i>Mrpl41</i>  | - | + |
| <i>Mrpl42</i>  | - | + |
| <i>Mrpl43</i>  | - | + |
| <i>Mrpl44</i>  | - | + |
| <i>Mrpl46</i>  | - | + |
| <i>Mrpl47</i>  | - | + |
| <i>Mrpl49</i>  | - | + |
| <i>Mrpl50</i>  | - | + |
| <i>Mrpl51</i>  | - | + |
| <i>Mrpl53</i>  | - | + |
| <i>Mrpl54</i>  | - | + |
| <i>Mrpl55</i>  | - | + |
| <i>Mrps10</i>  | - | + |
| <i>Mrps11</i>  | - | + |
| <i>Mrps12</i>  | - | + |
| <i>Mrps14</i>  | - | + |
| <i>Mrps15</i>  | - | + |
| <i>Mrps16</i>  | - | + |
| <i>Mrps17</i>  | - | + |
| <i>Mrps18b</i> | - | + |
| <i>Mrps18c</i> | - | + |
| <i>Mrps21</i>  | - | + |
| <i>Mrps25</i>  | - | + |
| <i>Mrps26</i>  | - | + |
| <i>Mrps27</i>  | - | + |
| <i>Mrps28</i>  | - | + |
| <i>Mrps31</i>  | - | + |
| <i>Mrps33</i>  | - | + |
| <i>Mrps34</i>  | - | + |
| <i>Mrps36</i>  | - | + |
| <i>Mrps7</i>   | - | + |
| <i>Mrrf</i>    | - | + |
| <i>Mrs2</i>    | - | + |
| <i>Mrto4</i>   | - | + |
| <i>Ms4a1</i>   | - | + |
| <i>Msh2</i>    | - | + |
| <i>Msh3</i>    | - | + |
| <i>Msh5</i>    | - | + |
| <i>Msh6</i>    | - | + |
| <i>Msi2</i>    | - | + |
| <i>Msl1</i>    | - | + |
| <i>Msl2</i>    | - | + |
| <i>Msl3</i>    | - | + |
| <i>Msn</i>     | - | + |
| <i>Msrb1</i>   | - | + |
| <i>Msrb2</i>   | - | + |
| <i>Mst1</i>    | - | + |
| <i>Msto1</i>   | - | + |
| <i>Mta1</i>    | - | + |
| <i>Mta2</i>    | - | + |
| <i>Mta3</i>    | - | + |
| <i>Mtbp</i>    | - | + |
| <i>Mtch1</i>   | - | + |

|                |   |   |
|----------------|---|---|
| <i>Mtch2</i>   | - | + |
| <i>Mtcp1</i>   | - | + |
| <i>Mtdh</i>    | - | + |
| <i>Mterf</i>   | - | + |
| <i>Mterfd1</i> | - | + |
| <i>Mterfd2</i> | - | + |
| <i>Mterfd3</i> | - | + |
| <i>Mtf1</i>    | - | + |
| <i>Mtf2</i>    | - | + |
| <i>Mtfmt</i>   | - | + |
| <i>Mtfp1</i>   | - | + |
| <i>Mtfr2</i>   | - | + |
| <i>Mtg1</i>    | - | + |
| <i>Mthfd1</i>  | - | + |
| <i>Mthfd11</i> | - | + |
| <i>Mthfd2</i>  | - | + |
| <i>Mthfr</i>   | - | + |
| <i>Mtif3</i>   | - | + |
| <i>Mtm1</i>    | - | + |
| <i>Mtmr1</i>   | - | + |
| <i>Mtmr10</i>  | - | + |
| <i>Mtmr12</i>  | - | + |
| <i>Mtmr14</i>  | - | + |
| <i>Mtmr2</i>   | - | + |
| <i>Mtmr3</i>   | - | + |
| <i>Mtmr4</i>   | - | + |
| <i>Mtmr6</i>   | - | + |
| <i>Mtor</i>    | - | + |
| <i>Mtpap</i>   | - | + |
| <i>Mtpn</i>    | - | + |
| <i>Mtr</i>     | - | + |
| <i>Mtrf1</i>   | - | + |
| <i>Mtrr</i>    | - | + |
| <i>Mtss1</i>   | - | + |
| <i>Mttp</i>    | - | + |
| <i>Mum1</i>    | - | + |
| <i>Mus81</i>   | - | + |
| <i>Mut</i>     | - | + |
| <i>Mutyh</i>   | - | + |
| <i>Mvb12a</i>  | - | + |
| <i>Mvd</i>     | - | + |
| <i>Mvk</i>     | - | + |
| <i>Mvp</i>     | - | + |
| <i>Mxd1</i>    | - | + |
| <i>Mxd3</i>    | - | + |
| <i>Mxd4</i>    | - | + |
| <i>Mxra8</i>   | - | + |
| <i>Myadm</i>   | - | + |
| <i>Mybbp1a</i> | - | + |
| <i>Mybl1</i>   | - | + |
| <i>Mybl2</i>   | - | + |
| <i>Myc</i>     | - | + |
| <i>Mycbp</i>   | - | + |



|                |   |   |
|----------------|---|---|
| <i>Mycbp2</i>  | - | + |
| <i>Myd88</i>   | - | + |
| <i>Myeov2</i>  | - | + |
| <i>Myg1</i>    | - | + |
| <i>Myh9</i>    | - | + |
| <i>Myl12a</i>  | - | + |
| <i>Myl12b</i>  | - | + |
| <i>Myl4</i>    | - | + |
| <i>Myl6</i>    | - | + |
| <i>Myl6b</i>   | - | + |
| <i>Myliip</i>  | - | + |
| <i>Myo19</i>   | - | + |
| <i>Myo1c</i>   | - | + |
| <i>Myo1e</i>   | - | + |
| <i>Myo1g</i>   | - | + |
| <i>Myo5a</i>   | - | + |
| <i>Myo9b</i>   | - | + |
| <i>Mysm1</i>   | - | + |
| <i>Myzap</i>   | - | + |
| <i>Mzf1</i>    | - | + |
| <i>Mzt1</i>    | - | + |
| <i>Mzt2</i>    | - | + |
| <i>N4bp1</i>   | - | + |
| <i>N4bp2l1</i> | - | + |
| <i>N4bp2l2</i> | - | + |
| <i>N4bp3</i>   | - | + |
| <i>N6amt1</i>  | - | + |
| <i>Naa10</i>   | - | + |
| <i>Naa15</i>   | - | + |
| <i>Naa16</i>   | - | + |
| <i>Naa20</i>   | - | + |
| <i>Naa25</i>   | - | + |
| <i>Naa30</i>   | - | + |
| <i>Naa38</i>   | - | + |
| <i>Naa40</i>   | - | + |
| <i>Naa50</i>   | - | + |
| <i>Naa60</i>   | - | + |
| <i>Naaa</i>    | - | + |
| <i>Nab1</i>    | - | + |
| <i>Nab2</i>    | - | + |
| <i>Nabp1</i>   | - | + |
| <i>Nabp2</i>   | - | + |
| <i>Naca</i>    | - | + |
| <i>Nacc1</i>   | - | + |
| <i>Nadk</i>    | - | + |
| <i>Nadsyn1</i> | - | + |
| <i>Naf1</i>    | - | + |
| <i>Nagk</i>    | - | + |
| <i>Nagpa</i>   | - | + |
| <i>Naif1</i>   | - | + |
| <i>Nampt</i>   | - | + |
| <i>Nanos1</i>  | - | + |
| <i>Nanp</i>    | - | + |

|                |   |   |
|----------------|---|---|
| <i>Nans</i>    | - | + |
| <i>Nap111</i>  | - | + |
| <i>Nap114</i>  | - | + |
| <i>Napa</i>    | - | + |
| <i>Napepld</i> | - | + |
| <i>Napg</i>    | - | + |
| <i>Naprt1</i>  | - | + |
| <i>Napsa</i>   | - | + |
| <i>Narf</i>    | - | + |
| <i>Narf1</i>   | - | + |
| <i>Narg2</i>   | - | + |
| <i>Nars2</i>   | - | + |
| <i>Nasp</i>    | - | + |
| <i>Nat10</i>   | - | + |
| <i>Nat2</i>    | - | + |
| <i>Nat6</i>    | - | + |
| <i>Nat9</i>    | - | + |
| <i>Nbeal1</i>  | - | + |
| <i>Nbeal2</i>  | - | + |
| <i>Nbn</i>     | - | + |
| <i>Nbr1</i>    | - | + |
| <i>Ncapd2</i>  | - | + |
| <i>Ncapg</i>   | - | + |
| <i>Ncapg2</i>  | - | + |
| <i>Ncaph</i>   | - | + |
| <i>Ncaph2</i>  | - | + |
| <i>Ncbp1</i>   | - | + |
| <i>Ncbp2</i>   | - | + |
| <i>Ncdn</i>    | - | + |
| <i>Nceh1</i>   | - | + |
| <i>Ncf1</i>    | - | + |
| <i>Ncf2</i>    | - | + |
| <i>Ncf4</i>    | - | + |
| <i>Nck2</i>    | - | + |
| <i>Nckipsd</i> | - | + |
| <i>Ncl</i>     | - | + |
| <i>Ncln</i>    | - | + |
| <i>Ncoa1</i>   | - | + |
| <i>Ncoa2</i>   | - | + |
| <i>Ncoa3</i>   | - | + |
| <i>Ncoa4</i>   | - | + |
| <i>Ncoa5</i>   | - | + |
| <i>Ncor1</i>   | - | + |
| <i>Ncor2</i>   | - | + |
| <i>Ncstn</i>   | - | + |
| <i>Ndc80</i>   | - | + |
| <i>Nde1</i>    | - | + |
| <i>Ndfip1</i>  | - | + |
| <i>Ndn12</i>   | - | + |
| <i>Ndor1</i>   | - | + |
| <i>Ndrg3</i>   | - | + |
| <i>Ndst2</i>   | - | + |
| <i>Ndufa1</i>  | - | + |

|                |   |   |
|----------------|---|---|
| <i>Ndufa11</i> | - | + |
| <i>Ndufa12</i> | - | + |
| <i>Ndufa13</i> | - | + |
| <i>Ndufa2</i>  | - | + |
| <i>Ndufa3</i>  | - | + |
| <i>Ndufa4</i>  | - | + |
| <i>Ndufa5</i>  | - | + |
| <i>Ndufa6</i>  | - | + |
| <i>Ndufa7</i>  | - | + |
| <i>Ndufa9</i>  | - | + |
| <i>Ndufab1</i> | - | + |
| <i>Ndufaf1</i> | - | + |
| <i>Ndufaf2</i> | - | + |
| <i>Ndufaf3</i> | - | + |
| <i>Ndufaf4</i> | - | + |
| <i>Ndufaf5</i> | - | + |
| <i>Ndufaf6</i> | - | + |
| <i>Ndufaf7</i> | - | + |
| <i>Ndufb11</i> | - | + |
| <i>Ndufb2</i>  | - | + |
| <i>Ndufb3</i>  | - | + |
| <i>Ndufb4</i>  | - | + |
| <i>Ndufb5</i>  | - | + |
| <i>Ndufb6</i>  | - | + |
| <i>Ndufb7</i>  | - | + |
| <i>Ndufb9</i>  | - | + |
| <i>Ndufc1</i>  | - | + |
| <i>Ndufc2</i>  | - | + |
| <i>Ndufs1</i>  | - | + |
| <i>Ndufs3</i>  | - | + |
| <i>Ndufs5</i>  | - | + |
| <i>Ndufs6</i>  | - | + |
| <i>Ndufs7</i>  | - | + |
| <i>Ndufs8</i>  | - | + |
| <i>Ndufv2</i>  | - | + |
| <i>Neat1</i>   | - | + |
| <i>Necap1</i>  | - | + |
| <i>Necap2</i>  | - | + |
| <i>Nedd1</i>   | - | + |
| <i>Nedd8</i>   | - | + |
| <i>Nedd9</i>   | - | + |
| <i>Neil1</i>   | - | + |
| <i>Nek1</i>    | - | + |
| <i>Nek2</i>    | - | + |
| <i>Nek3</i>    | - | + |
| <i>Nek4</i>    | - | + |
| <i>Nek6</i>    | - | + |
| <i>Nek7</i>    | - | + |
| <i>Nek8</i>    | - | + |
| <i>Nek9</i>    | - | + |
| <i>Nelfa</i>   | - | + |
| <i>Nelfb</i>   | - | + |
| <i>Nelfcd</i>  | - | + |

|                 |   |   |
|-----------------|---|---|
| <i>Nelfe</i>    | - | + |
| <i>Nemf</i>     | - | + |
| <i>Net1</i>     | - | + |
| <i>Neu1</i>     | - | + |
| <i>Neu3</i>     | - | + |
| <i>Neurl2</i>   | - | + |
| <i>Neurl3</i>   | - | + |
| <i>Neurl4</i>   | - | + |
| <i>Nf1</i>      | - | + |
| <i>Nf2</i>      | - | + |
| <i>Nfat5</i>    | - | + |
| <i>Nfatc2ip</i> | - | + |
| <i>Nfatc3</i>   | - | + |
| <i>Nfe2l2</i>   | - | + |
| <i>Nfkb1</i>    | - | + |
| <i>Nfkb2</i>    | - | + |
| <i>Nfkbia</i>   | - | + |
| <i>Nfkbib</i>   | - | + |
| <i>Nfkbid</i>   | - | + |
| <i>Nfkbi1</i>   | - | + |
| <i>Nfkbiz</i>   | - | + |
| <i>Nfrkb</i>    | - | + |
| <i>Nfs1</i>     | - | + |
| <i>Nfu1</i>     | - | + |
| <i>Nfx1</i>     | - | + |
| <i>Nfxl1</i>    | - | + |
| <i>Nfya</i>     | - | + |
| <i>Nfyb</i>     | - | + |
| <i>Nfyc</i>     | - | + |
| <i>Ngly1</i>    | - | + |
| <i>Ngrn</i>     | - | + |
| <i>Nhej1</i>    | - | + |
| <i>Nhlrc2</i>   | - | + |
| <i>Nhlrc3</i>   | - | + |
| <i>Nhp2</i>     | - | + |
| <i>Nicn1</i>    | - | + |
| <i>Nif3l1</i>   | - | + |
| <i>Ninj1</i>    | - | + |
| <i>Nip7</i>     | - | + |
| <i>Nipa2</i>    | - | + |
| <i>Nipal3</i>   | - | + |
| <i>Nipbl</i>    | - | + |
| <i>Nit1</i>     | - | + |
| <i>Nit2</i>     | - | + |
| <i>Nkap</i>     | - | + |
| <i>Nkiras1</i>  | - | + |
| <i>Nkiras2</i>  | - | + |
| <i>Nktr</i>     | - | + |
| <i>Nlrx1</i>    | - | + |
| <i>Nmb</i>      | - | + |
| <i>Nmd3</i>     | - | + |
| <i>Nme1</i>     | - | + |
| <i>Nme2</i>     | - | + |

|                |   |   |
|----------------|---|---|
| <i>Nme3</i>    | - | + |
| <i>Nme4</i>    | - | + |
| <i>Nme6</i>    | - | + |
| <i>Nme7</i>    | - | + |
| <i>Nmi</i>     | - | + |
| <i>Nmnat1</i>  | - | + |
| <i>Nmnat3</i>  | - | + |
| <i>Nmral1</i>  | - | + |
| <i>Nmrk1</i>   | - | + |
| <i>Nmt1</i>    | - | + |
| <i>Nnt</i>     | - | + |
| <i>Noa1</i>    | - | + |
| <i>Noc4l</i>   | - | + |
| <i>Nod2</i>    | - | + |
| <i>Nol10</i>   | - | + |
| <i>Nol11</i>   | - | + |
| <i>Nol12</i>   | - | + |
| <i>Nol7</i>    | - | + |
| <i>Nol8</i>    | - | + |
| <i>Nol9</i>    | - | + |
| <i>Nolc1</i>   | - | + |
| <i>Nomo1</i>   | - | + |
| <i>Nono</i>    | - | + |
| <i>Nop10</i>   | - | + |
| <i>Nop14</i>   | - | + |
| <i>Nop16</i>   | - | + |
| <i>Nop2</i>    | - | + |
| <i>Nop56</i>   | - | + |
| <i>Nop9</i>    | - | + |
| <i>Nosip</i>   | - | + |
| <i>Npat</i>    | - | + |
| <i>Npc1</i>    | - | + |
| <i>Npc2</i>    | - | + |
| <i>Npepl1</i>  | - | + |
| <i>Npepps</i>  | - | + |
| <i>Nploc4</i>  | - | + |
| <i>Nprl2</i>   | - | + |
| <i>Nqo2</i>    | - | + |
| <i>Nr1h2</i>   | - | + |
| <i>Nr2c1</i>   | - | + |
| <i>Nr2c2</i>   | - | + |
| <i>Nr2c2ap</i> | - | + |
| <i>Nr3c1</i>   | - | + |
| <i>Nradd</i>   | - | + |
| <i>Nras</i>    | - | + |
| <i>Nrbf2</i>   | - | + |
| <i>Nrde2</i>   | - | + |
| <i>Nrf1</i>    | - | + |
| <i>Nrm</i>     | - | + |
| <i>Nrp</i>     | - | + |
| <i>Nsa2</i>    | - | + |
| <i>Nsd1</i>    | - | + |
| <i>Nsdhl</i>   | - | + |

|                 |   |   |
|-----------------|---|---|
| <i>Nsf</i>      | - | + |
| <i>Nsfl1c</i>   | - | + |
| <i>Nsmaf</i>    | - | + |
| <i>Nsmce1</i>   | - | + |
| <i>Nsmce2</i>   | - | + |
| <i>Nsmce4a</i>  | - | + |
| <i>Nsmf</i>     | - | + |
| <i>Nsun3</i>    | - | + |
| <i>Nsun4</i>    | - | + |
| <i>Nsun5</i>    | - | + |
| <i>Nsun6</i>    | - | + |
| <i>Nt5c</i>     | - | + |
| <i>Nt5c3</i>    | - | + |
| <i>Nt5c3l</i>   | - | + |
| <i>Nt5dc1</i>   | - | + |
| <i>Nt5dc3</i>   | - | + |
| <i>Nt5m</i>     | - | + |
| <i>Ntan1</i>    | - | + |
| <i>Nth1</i>     | - | + |
| <i>Nub1</i>     | - | + |
| <i>Nubp2</i>    | - | + |
| <i>Nubpl</i>    | - | + |
| <i>Nucb1</i>    | - | + |
| <i>Nucb2</i>    | - | + |
| <i>Nudcd1</i>   | - | + |
| <i>Nudcd2</i>   | - | + |
| <i>Nudt1</i>    | - | + |
| <i>Nudt13</i>   | - | + |
| <i>Nudt14</i>   | - | + |
| <i>Nudt16</i>   | - | + |
| <i>Nudt16l1</i> | - | + |
| <i>Nudt18</i>   | - | + |
| <i>Nudt2</i>    | - | + |
| <i>Nudt21</i>   | - | + |
| <i>Nudt3</i>    | - | + |
| <i>Nudt5</i>    | - | + |
| <i>Nudt6</i>    | - | + |
| <i>Nudt7</i>    | - | + |
| <i>Nudt8</i>    | - | + |
| <i>Nudt9</i>    | - | + |
| <i>Nuf2</i>     | - | + |
| <i>Nufip1</i>   | - | + |
| <i>Nufip2</i>   | - | + |
| <i>Numa1</i>    | - | + |
| <i>Nup107</i>   | - | + |
| <i>Nup133</i>   | - | + |
| <i>Nup153</i>   | - | + |
| <i>Nup155</i>   | - | + |
| <i>Nup160</i>   | - | + |
| <i>Nup188</i>   | - | + |
| <i>Nup205</i>   | - | + |
| <i>Nup210</i>   | - | + |
| <i>Nup35</i>    | - | + |

|                    |   |   |
|--------------------|---|---|
| <i>Nup37</i>       | - | + |
| <i>Nup43</i>       | - | + |
| <i>Nup50</i>       | - | + |
| <i>Nup54</i>       | - | + |
| <i>Nup62</i>       | - | + |
| <i>Nup62-il4i1</i> | - | + |
| <i>Nup85</i>       | - | + |
| <i>Nup88</i>       | - | + |
| <i>Nup98</i>       | - | + |
| <i>Nup11</i>       | - | + |
| <i>Nup12</i>       | - | + |
| <i>Nusap1</i>      | - | + |
| <i>Nutf2</i>       | - | + |
| <i>Nutf2-ps1</i>   | - | + |
| <i>Nvl</i>         | - | + |
| <i>Nxf1</i>        | - | + |
| <i>Nxpe3</i>       | - | + |
| <i>Oard1</i>       | - | + |
| <i>Oas1b</i>       | - | + |
| <i>Oas1c</i>       | - | + |
| <i>Oasl2</i>       | - | + |
| <i>Oaz1</i>        | - | + |
| <i>Oaz1-ps</i>     | - | + |
| <i>Oaz2</i>        | - | + |
| <i>Ocel1</i>       | - | + |
| <i>Ociad1</i>      | - | + |
| <i>Ocrl</i>        | - | + |
| <i>Odf2l</i>       | - | + |
| <i>Ofd1</i>        | - | + |
| <i>Ogfod1</i>      | - | + |
| <i>Ogfod2</i>      | - | + |
| <i>Ogfod3</i>      | - | + |
| <i>Ogfr</i>        | - | + |
| <i>Ogg1</i>        | - | + |
| <i>Oip5</i>        | - | + |
| <i>Ola1</i>        | - | + |
| <i>Olfml2a</i>     | - | + |
| <i>Oma1</i>        | - | + |
| <i>Opa3</i>        | - | + |
| <i>Opn3</i>        | - | + |
| <i>Optn</i>        | - | + |
| <i>Orai1</i>       | - | + |
| <i>Orai2</i>       | - | + |
| <i>Orai3</i>       | - | + |
| <i>Orc1</i>        | - | + |
| <i>Orc2</i>        | - | + |
| <i>Orc3</i>        | - | + |
| <i>Orc4</i>        | - | + |
| <i>Orc5</i>        | - | + |
| <i>Orc6</i>        | - | + |
| <i>Ormdl1</i>      | - | + |
| <i>Ormdl2</i>      | - | + |
| <i>Os9</i>         | - | + |

|                 |   |   |
|-----------------|---|---|
| <i>Osbpl11</i>  | - | + |
| <i>Osbpl7</i>   | - | + |
| <i>Osbpl8</i>   | - | + |
| <i>Oscar</i>    | - | + |
| <i>Oscp1</i>    | - | + |
| <i>Osgep</i>    | - | + |
| <i>Osgep1</i>   | - | + |
| <i>Ost4</i>     | - | + |
| <i>Ostf1</i>    | - | + |
| <i>Ostm1</i>    | - | + |
| <i>Otub1</i>    | - | + |
| <i>Otub2</i>    | - | + |
| <i>Otud1</i>    | - | + |
| <i>Otud4</i>    | - | + |
| <i>Otud5</i>    | - | + |
| <i>Ovca2</i>    | - | + |
| <i>Oxa1l</i>    | - | + |
| <i>Oxld1</i>    | - | + |
| <i>Oxnad1</i>   | - | + |
| <i>Oxsm</i>     | - | + |
| <i>Oxsr1</i>    | - | + |
| <i>P2ry10</i>   | - | + |
| <i>P2ry12</i>   | - | + |
| <i>P2ry14</i>   | - | + |
| <i>P4hb</i>     | - | + |
| <i>P4htm</i>    | - | + |
| <i>Pa2g4</i>    | - | + |
| <i>Pabpc1</i>   | - | + |
| <i>Pabpn1</i>   | - | + |
| <i>Pacrgl</i>   | - | + |
| <i>Pacs1</i>    | - | + |
| <i>Pacs2</i>    | - | + |
| <i>Pacsin2</i>  | - | + |
| <i>Padi2</i>    | - | + |
| <i>Paf1</i>     | - | + |
| <i>Pafah1b2</i> | - | + |
| <i>Pagr1a</i>   | - | + |
| <i>Paics</i>    | - | + |
| <i>Paip2</i>    | - | + |
| <i>Paip2b</i>   | - | + |
| <i>Pak1ip1</i>  | - | + |
| <i>Pak2</i>     | - | + |
| <i>Pak4</i>     | - | + |
| <i>Palb2</i>    | - | + |
| <i>Palm</i>     | - | + |
| <i>Pam16</i>    | - | + |
| <i>Pan2</i>     | - | + |
| <i>Pan3</i>     | - | + |
| <i>Pank1</i>    | - | + |
| <i>Pank2</i>    | - | + |
| <i>Panx1</i>    | - | + |
| <i>Papd7</i>    | - | + |
| <i>Papln</i>    | - | + |



|                |   |   |
|----------------|---|---|
| <i>Papola</i>  | - | + |
| <i>Papss1</i>  | - | + |
| <i>Pard6a</i>  | - | + |
| <i>Parg</i>    | - | + |
| <i>Park7</i>   | - | + |
| <i>Parl</i>    | - | + |
| <i>Parn</i>    | - | + |
| <i>Parp1</i>   | - | + |
| <i>Parp10</i>  | - | + |
| <i>Parp11</i>  | - | + |
| <i>Parp2</i>   | - | + |
| <i>Parp3</i>   | - | + |
| <i>Parp4</i>   | - | + |
| <i>Parp6</i>   | - | + |
| <i>Parp8</i>   | - | + |
| <i>Parp9</i>   | - | + |
| <i>Parpbp</i>  | - | + |
| <i>Pars2</i>   | - | + |
| <i>Parvg</i>   | - | + |
| <i>Pask</i>    | - | + |
| <i>Patl1</i>   | - | + |
| <i>Patz1</i>   | - | + |
| <i>Pax5</i>    | - | + |
| <i>Paxip1</i>  | - | + |
| <i>Pbk</i>     | - | + |
| <i>Pbld2</i>   | - | + |
| <i>Pbrm1</i>   | - | + |
| <i>Pbx2</i>    | - | + |
| <i>Pbx4</i>    | - | + |
| <i>Pbxip1</i>  | - | + |
| <i>Pcbd2</i>   | - | + |
| <i>Pcbp1</i>   | - | + |
| <i>Pcbp2</i>   | - | + |
| <i>Pcca</i>    | - | + |
| <i>Pced1a</i>  | - | + |
| <i>Pcgf6</i>   | - | + |
| <i>Pcid2</i>   | - | + |
| <i>Pcif1</i>   | - | + |
| <i>Pck2</i>    | - | + |
| <i>Pcm1</i>    | - | + |
| <i>Pcmt1</i>   | - | + |
| <i>Pcmtd1</i>  | - | + |
| <i>Pcmtd2</i>  | - | + |
| <i>Pcna</i>    | - | + |
| <i>Pcnp</i>    | - | + |
| <i>Pcnt</i>    | - | + |
| <i>Pcnxl3</i>  | - | + |
| <i>Pcnxl4</i>  | - | + |
| <i>Pcsk7</i>   | - | + |
| <i>Pcyox1l</i> | - | + |
| <i>Pcyt2</i>   | - | + |
| <i>Pdap1</i>   | - | + |
| <i>Pdcd11</i>  | - | + |

|                |   |   |
|----------------|---|---|
| <i>Pdcd2</i>   | - | + |
| <i>Pdcd2l</i>  | - | + |
| <i>Pdcd4</i>   | - | + |
| <i>Pdcd5</i>   | - | + |
| <i>Pdcd6</i>   | - | + |
| <i>Pdcd6ip</i> | - | + |
| <i>Pdcl</i>    | - | + |
| <i>Pdcl3</i>   | - | + |
| <i>Pddc1</i>   | - | + |
| <i>Pde12</i>   | - | + |
| <i>Pde3b</i>   | - | + |
| <i>Pde4b</i>   | - | + |
| <i>Pde6d</i>   | - | + |
| <i>Pde7a</i>   | - | + |
| <i>Pdf</i>     | - | + |
| <i>Pdha1</i>   | - | + |
| <i>Pdhx</i>    | - | + |
| <i>Pdia3</i>   | - | + |
| <i>Pdia4</i>   | - | + |
| <i>Pdia6</i>   | - | + |
| <i>Pdk1</i>    | - | + |
| <i>Pdk3</i>    | - | + |
| <i>Pdlim5</i>  | - | + |
| <i>Pdp1</i>    | - | + |
| <i>Pdp2</i>    | - | + |
| <i>Pdpk1</i>   | - | + |
| <i>Pdpr</i>    | - | + |
| <i>Pds5a</i>   | - | + |
| <i>Pds5b</i>   | - | + |
| <i>Pdss1</i>   | - | + |
| <i>Pdss2</i>   | - | + |
| <i>Pdxdc1</i>  | - | + |
| <i>Pdxk</i>    | - | + |
| <i>Pdyp</i>    | - | + |
| <i>Pdzd11</i>  | - | + |
| <i>Pdzd2</i>   | - | + |
| <i>Pdzd8</i>   | - | + |
| <i>Pea15a</i>  | - | + |
| <i>Pebp1</i>   | - | + |
| <i>Pef1</i>    | - | + |
| <i>Peg13</i>   | - | + |
| <i>Pelo</i>    | - | + |
| <i>Pelp1</i>   | - | + |
| <i>Peo1</i>    | - | + |
| <i>Pepd</i>    | - | + |
| <i>Per1</i>    | - | + |
| <i>Pet100</i>  | - | + |
| <i>Pet112</i>  | - | + |
| <i>Pet117</i>  | - | + |
| <i>Pex1</i>    | - | + |
| <i>Pex10</i>   | - | + |
| <i>Pex11b</i>  | - | + |
| <i>Pex11c</i>  | - | + |

|               |   |   |
|---------------|---|---|
| <i>Pex12</i>  | - | + |
| <i>Pex13</i>  | - | + |
| <i>Pex19</i>  | - | + |
| <i>Pex2</i>   | - | + |
| <i>Pex3</i>   | - | + |
| <i>Pex6</i>   | - | + |
| <i>Pex7</i>   | - | + |
| <i>Pfas</i>   | - | + |
| <i>Pfdn2</i>  | - | + |
| <i>Pfdn5</i>  | - | + |
| <i>Pfkfb1</i> | - | + |
| <i>Pfkfb2</i> | - | + |
| <i>Pfkfb3</i> | - | + |
| <i>Pfkp</i>   | - | + |
| <i>Pfn1</i>   | - | + |
| <i>Pgam1</i>  | - | + |
| <i>Pgam5</i>  | - | + |
| <i>Pgap2</i>  | - | + |
| <i>Pgd</i>    | - | + |
| <i>Pggt1b</i> | - | + |
| <i>Pgk1</i>   | - | + |
| <i>Pgls</i>   | - | + |
| <i>Pgm1</i>   | - | + |
| <i>Pgm3</i>   | - | + |
| <i>Pgp</i>    | - | + |
| <i>Pgpep1</i> | - | + |
| <i>Phax</i>   | - | + |
| <i>Phb</i>    | - | + |
| <i>Phb2</i>   | - | + |
| <i>Phc2</i>   | - | + |
| <i>Phc3</i>   | - | + |
| <i>Phf1</i>   | - | + |
| <i>Phf10</i>  | - | + |
| <i>Phf14</i>  | - | + |
| <i>Phf15</i>  | - | + |
| <i>Phf19</i>  | - | + |
| <i>Phf2</i>   | - | + |
| <i>Phf20</i>  | - | + |
| <i>Phf21a</i> | - | + |
| <i>Phf23</i>  | - | + |
| <i>Phf5a</i>  | - | + |
| <i>Phf6</i>   | - | + |
| <i>Phf7</i>   | - | + |
| <i>Phf8</i>   | - | + |
| <i>Phgdh</i>  | - | + |
| <i>Phip</i>   | - | + |
| <i>Phka1</i>  | - | + |
| <i>Phka2</i>  | - | + |
| <i>Phkb</i>   | - | + |
| <i>Phkg2</i>  | - | + |
| <i>Phldb3</i> | - | + |
| <i>Phlpp1</i> | - | + |
| <i>Phlpp2</i> | - | + |

|                 |   |   |
|-----------------|---|---|
| <i>Phospho2</i> | - | + |
| <i>Phtf1</i>    | - | + |
| <i>Phtf2</i>    | - | + |
| <i>Phyh</i>     | - | + |
| <i>Pi4ka</i>    | - | + |
| <i>Pi4kb</i>    | - | + |
| <i>Pias1</i>    | - | + |
| <i>Pias2</i>    | - | + |
| <i>Pias4</i>    | - | + |
| <i>Pibf1</i>    | - | + |
| <i>Picalm</i>   | - | + |
| <i>Piezo1</i>   | - | + |
| <i>Pif1</i>     | - | + |
| <i>Piga</i>     | - | + |
| <i>Pigb</i>     | - | + |
| <i>Pigf</i>     | - | + |
| <i>Pigg</i>     | - | + |
| <i>Pigh</i>     | - | + |
| <i>Pigk</i>     | - | + |
| <i>Pigl</i>     | - | + |
| <i>Pigm</i>     | - | + |
| <i>Pign</i>     | - | + |
| <i>Pigo</i>     | - | + |
| <i>Pigp</i>     | - | + |
| <i>Pigq</i>     | - | + |
| <i>Pigs</i>     | - | + |
| <i>Pigt</i>     | - | + |
| <i>Pigu</i>     | - | + |
| <i>Pigv</i>     | - | + |
| <i>Pigw</i>     | - | + |
| <i>Pigx</i>     | - | + |
| <i>Pih1d1</i>   | - | + |
| <i>Pih1d2</i>   | - | + |
| <i>Pik3ap1</i>  | - | + |
| <i>Pik3c2b</i>  | - | + |
| <i>Pik3c3</i>   | - | + |
| <i>Pik3cd</i>   | - | + |
| <i>Pik3cg</i>   | - | + |
| <i>Pik3r2</i>   | - | + |
| <i>Pik3r4</i>   | - | + |
| <i>Pim1</i>     | - | + |
| <i>Pim2</i>     | - | + |
| <i>Pim3</i>     | - | + |
| <i>Pin1</i>     | - | + |
| <i>Pink1</i>    | - | + |
| <i>Pinlyp</i>   | - | + |
| <i>Pinx1</i>    | - | + |
| <i>Pion</i>     | - | + |
| <i>Pip4k2a</i>  | - | + |
| <i>Pip4k2b</i>  | - | + |
| <i>Pip4k2c</i>  | - | + |
| <i>Pip5k1a</i>  | - | + |
| <i>Pip5k1c</i>  | - | + |

|                 |   |   |
|-----------------|---|---|
| <i>Pisd</i>     | - | + |
| <i>Pisd-ps1</i> | - | + |
| <i>Pisd-ps3</i> | - | + |
| <i>Pithd1</i>   | - | + |
| <i>Pitpna</i>   | - | + |
| <i>Pitpnb</i>   | - | + |
| <i>Pitpnc1</i>  | - | + |
| <i>Pitpnm1</i>  | - | + |
| <i>Pkd1l3</i>   | - | + |
| <i>Pkib</i>     | - | + |
| <i>Pkig</i>     | - | + |
| <i>Pkm</i>      | - | + |
| <i>Pkmyt1</i>   | - | + |
| <i>Pkn1</i>     | - | + |
| <i>Pkn2</i>     | - | + |
| <i>Pkn3</i>     | - | + |
| <i>Pknox1</i>   | - | + |
| <i>Pla2g12a</i> | - | + |
| <i>Pla2g15</i>  | - | + |
| <i>Pla2g6</i>   | - | + |
| <i>Pla2g7</i>   | - | + |
| <i>Plaa</i>     | - | + |
| <i>Plagl2</i>   | - | + |
| <i>Plcxd1</i>   | - | + |
| <i>Plcxd2</i>   | - | + |
| <i>Pld3</i>     | - | + |
| <i>Plek</i>     | - | + |
| <i>Plekha2</i>  | - | + |
| <i>Plekha3</i>  | - | + |
| <i>Plekha2</i>  | - | + |
| <i>Plekht2</i>  | - | + |
| <i>Plekhg2</i>  | - | + |
| <i>Plekhj1</i>  | - | + |
| <i>Plekhm1</i>  | - | + |
| <i>Plekhm2</i>  | - | + |
| <i>Plekhm3</i>  | - | + |
| <i>Plekho1</i>  | - | + |
| <i>Plekho2</i>  | - | + |
| <i>Plgrkt</i>   | - | + |
| <i>Plin2</i>    | - | + |
| <i>Plin3</i>    | - | + |
| <i>Plk1</i>     | - | + |
| <i>Plk1s1</i>   | - | + |
| <i>Plk3</i>     | - | + |
| <i>Plk4</i>     | - | + |
| <i>Plod3</i>    | - | + |
| <i>Plp2</i>     | - | + |
| <i>Plrg1</i>    | - | + |
| <i>Plscr1</i>   | - | + |
| <i>Plscr3</i>   | - | + |
| <i>Plscr4</i>   | - | + |
| <i>Plxnb2</i>   | - | + |
| <i>Plxnc1</i>   | - | + |

|                |   |   |
|----------------|---|---|
| <i>Pmaip1</i>  | - | + |
| <i>Pmel</i>    | - | + |
| <i>Pmf1</i>    | - | + |
| <i>Pmm1</i>    | - | + |
| <i>Pmm2</i>    | - | + |
| <i>Pmpca</i>   | - | + |
| <i>Pmpcb</i>   | - | + |
| <i>Pms1</i>    | - | + |
| <i>Pms2</i>    | - | + |
| <i>Pmvk</i>    | - | + |
| <i>Pnkd</i>    | - | + |
| <i>Pnkp</i>    | - | + |
| <i>Pnn</i>     | - | + |
| <i>Pno1</i>    | - | + |
| <i>Pnp</i>     | - | + |
| <i>Pnpla2</i>  | - | + |
| <i>Pnpla6</i>  | - | + |
| <i>Pnpla7</i>  | - | + |
| <i>Pnpla8</i>  | - | + |
| <i>Pnpo</i>    | - | + |
| <i>Pnpt1</i>   | - | + |
| <i>Pnrc2</i>   | - | + |
| <i>Poc1a</i>   | - | + |
| <i>Poc1b</i>   | - | + |
| <i>Poc5</i>    | - | + |
| <i>Pofut1</i>  | - | + |
| <i>Pola1</i>   | - | + |
| <i>Pola2</i>   | - | + |
| <i>Polb</i>    | - | + |
| <i>Pold1</i>   | - | + |
| <i>Pold2</i>   | - | + |
| <i>Pold3</i>   | - | + |
| <i>Pold4</i>   | - | + |
| <i>Poldip2</i> | - | + |
| <i>Poldip3</i> | - | + |
| <i>Pole</i>    | - | + |
| <i>Pole2</i>   | - | + |
| <i>Pole4</i>   | - | + |
| <i>Polg2</i>   | - | + |
| <i>Polh</i>    | - | + |
| <i>Poli</i>    | - | + |
| <i>Polk</i>    | - | + |
| <i>Poll</i>    | - | + |
| <i>Polm</i>    | - | + |
| <i>Poln</i>    | - | + |
| <i>Polq</i>    | - | + |
| <i>Polr1a</i>  | - | + |
| <i>Polr1b</i>  | - | + |
| <i>Polr1c</i>  | - | + |
| <i>Polr1d</i>  | - | + |
| <i>Polr1e</i>  | - | + |
| <i>Polr2a</i>  | - | + |
| <i>Polr2b</i>  | - | + |

|                 |   |   |
|-----------------|---|---|
| <i>Polr2c</i>   | - | + |
| <i>Polr2d</i>   | - | + |
| <i>Polr2e</i>   | - | + |
| <i>Polr2g</i>   | - | + |
| <i>Polr2i</i>   | - | + |
| <i>Polr2j</i>   | - | + |
| <i>Polr3a</i>   | - | + |
| <i>Polr3b</i>   | - | + |
| <i>Polr3c</i>   | - | + |
| <i>Polr3e</i>   | - | + |
| <i>Polr3g</i>   | - | + |
| <i>Polr3h</i>   | - | + |
| <i>Polrmt</i>   | - | + |
| <i>Pom121</i>   | - | + |
| <i>Pomgnt1</i>  | - | + |
| <i>Pomp</i>     | - | + |
| <i>Pomt1</i>    | - | + |
| <i>Pomt2</i>    | - | + |
| <i>Pon2</i>     | - | + |
| <i>Pon3</i>     | - | + |
| <i>Pop1</i>     | - | + |
| <i>Pop4</i>     | - | + |
| <i>Por</i>      | - | + |
| <i>Pou2af1</i>  | - | + |
| <i>Pou2f1</i>   | - | + |
| <i>Pou2f2</i>   | - | + |
| <i>Ppa2</i>     | - | + |
| <i>Ppan</i>     | - | + |
| <i>Ppap2a</i>   | - | + |
| <i>Ppap2c</i>   | - | + |
| <i>Ppapdc1b</i> | - | + |
| <i>Ppard</i>    | - | + |
| <i>Ppargc1a</i> | - | + |
| <i>Ppat</i>     | - | + |
| <i>Ppcdc</i>    | - | + |
| <i>Ppcs</i>     | - | + |
| <i>Ppdpf</i>    | - | + |
| <i>Ppfibp1</i>  | - | + |
| <i>Ppfibp2</i>  | - | + |
| <i>Pphln1</i>   | - | + |
| <i>Ppia</i>     | - | + |
| <i>Ppib</i>     | - | + |
| <i>Ppid</i>     | - | + |
| <i>Ppie</i>     | - | + |
| <i>Ppif</i>     | - | + |
| <i>Ppih</i>     | - | + |
| <i>Ppil1</i>    | - | + |
| <i>Ppil2</i>    | - | + |
| <i>Ppil3</i>    | - | + |
| <i>Ppil4</i>    | - | + |
| <i>Ppip5k2</i>  | - | + |
| <i>Ppm1b</i>    | - | + |
| <i>Ppm1d</i>    | - | + |

|                   |   |   |
|-------------------|---|---|
| <i>Ppm1f</i>      | - | + |
| <i>Ppm1g</i>      | - | + |
| <i>Ppm1k</i>      | - | + |
| <i>Ppm1m</i>      | - | + |
| <i>Ppme1</i>      | - | + |
| <i>Ppox</i>       | - | + |
| <i>Ppp1ca</i>     | - | + |
| <i>Ppp1cc</i>     | - | + |
| <i>Ppp1r10</i>    | - | + |
| <i>Ppp1r12a</i>   | - | + |
| <i>Ppp1r12c</i>   | - | + |
| <i>Ppp1r14b</i>   | - | + |
| <i>Ppp1r15b</i>   | - | + |
| <i>Ppp1r16a</i>   | - | + |
| <i>Ppp1r16b</i>   | - | + |
| <i>Ppp1r18</i>    | - | + |
| <i>Ppp1r21</i>    | - | + |
| <i>Ppp1r27</i>    | - | + |
| <i>Ppp1r35</i>    | - | + |
| <i>Ppp1r37</i>    | - | + |
| <i>Ppp1r3f</i>    | - | + |
| <i>Ppp1r7</i>     | - | + |
| <i>Ppp1r8</i>     | - | + |
| <i>Ppp2ca</i>     | - | + |
| <i>Ppp2cb</i>     | - | + |
| <i>Ppp2r1b</i>    | - | + |
| <i>Ppp2r2d</i>    | - | + |
| <i>Ppp2r3c</i>    | - | + |
| <i>Ppp2r4</i>     | - | + |
| <i>Ppp2r5a</i>    | - | + |
| <i>Ppp2r5b</i>    | - | + |
| <i>Ppp2r5d</i>    | - | + |
| <i>Ppp2r5e</i>    | - | + |
| <i>Ppp3ca</i>     | - | + |
| <i>Ppp3cb</i>     | - | + |
| <i>Ppp3cc</i>     | - | + |
| <i>Ppp3r1</i>     | - | + |
| <i>Ppp4c</i>      | - | + |
| <i>Ppp4r1</i>     | - | + |
| <i>Ppp4r1l-ps</i> | - | + |
| <i>Ppp4r2</i>     | - | + |
| <i>Ppp5c</i>      | - | + |
| <i>Ppp6c</i>      | - | + |
| <i>Ppp6r1</i>     | - | + |
| <i>Ppp6r2</i>     | - | + |
| <i>Ppp6r3</i>     | - | + |
| <i>Pprc1</i>      | - | + |
| <i>Ppt1</i>       | - | + |
| <i>Pptc7</i>      | - | + |
| <i>Ppwd1</i>      | - | + |
| <i>Pqbp1</i>      | - | + |
| <i>Pqlc1</i>      | - | + |
| <i>Pqlc2</i>      | - | + |



|                 |   |   |
|-----------------|---|---|
| <i>Pqlc3</i>    | - | + |
| <i>Pradc1</i>   | - | + |
| <i>Praf2</i>    | - | + |
| <i>Pramef8</i>  | - | + |
| <i>Prc1</i>     | - | + |
| <i>Prcc</i>     | - | + |
| <i>Prcp</i>     | - | + |
| <i>Prdm15</i>   | - | + |
| <i>Prdm2</i>    | - | + |
| <i>Prdm9</i>    | - | + |
| <i>Prdx1</i>    | - | + |
| <i>Prdx2</i>    | - | + |
| <i>Prdx3</i>    | - | + |
| <i>Prdx4</i>    | - | + |
| <i>Prdx5</i>    | - | + |
| <i>Prdx6</i>    | - | + |
| <i>Preb</i>     | - | + |
| <i>Prelid1</i>  | - | + |
| <i>Prep</i>     | - | + |
| <i>Prepl</i>    | - | + |
| <i>Prex1</i>    | - | + |
| <i>Prickle3</i> | - | + |
| <i>Prim1</i>    | - | + |
| <i>Prkab1</i>   | - | + |
| <i>Prkaca</i>   | - | + |
| <i>Prkag1</i>   | - | + |
| <i>Prkar2a</i>  | - | + |
| <i>Prkcb</i>    | - | + |
| <i>Prkcd</i>    | - | + |
| <i>Prkci</i>    | - | + |
| <i>Prkd2</i>    | - | + |
| <i>Prkd3</i>    | - | + |
| <i>Prkdc</i>    | - | + |
| <i>Prkrip1</i>  | - | + |
| <i>Prkrir</i>   | - | + |
| <i>Prkx</i>     | - | + |
| <i>Prmt1</i>    | - | + |
| <i>Prmt10</i>   | - | + |
| <i>Prmt2</i>    | - | + |
| <i>Prmt3</i>    | - | + |
| <i>Prmt5</i>    | - | + |
| <i>Prmt6</i>    | - | + |
| <i>Prmt7</i>    | - | + |
| <i>Prnp</i>     | - | + |
| <i>Prosc</i>    | - | + |
| <i>Proser1</i>  | - | + |
| <i>Prox2</i>    | - | + |
| <i>Prpf18</i>   | - | + |
| <i>Prpf19</i>   | - | + |
| <i>Prpf3</i>    | - | + |
| <i>Prpf31</i>   | - | + |
| <i>Prpf38a</i>  | - | + |
| <i>Prpf38b</i>  | - | + |

|                |   |   |
|----------------|---|---|
| <i>Prpf39</i>  | - | + |
| <i>Prpf4</i>   | - | + |
| <i>Prpf40a</i> | - | + |
| <i>Prpf6</i>   | - | + |
| <i>Prps1</i>   | - | + |
| <i>Prps1l3</i> | - | + |
| <i>Prps2</i>   | - | + |
| <i>Prpsap1</i> | - | + |
| <i>Prpsap2</i> | - | + |
| <i>Prr11</i>   | - | + |
| <i>Prr12</i>   | - | + |
| <i>Prr13</i>   | - | + |
| <i>Prr14</i>   | - | + |
| <i>Prr14l</i>  | - | + |
| <i>Prr24</i>   | - | + |
| <i>Prr3</i>    | - | + |
| <i>Prrc1</i>   | - | + |
| <i>Prrc2a</i>  | - | + |
| <i>Prrc2b</i>  | - | + |
| <i>Prrg2</i>   | - | + |
| <i>Prune</i>   | - | + |
| <i>Psap</i>    | - | + |
| <i>Psat1</i>   | - | + |
| <i>Psen1</i>   | - | + |
| <i>Psen2</i>   | - | + |
| <i>Psenen</i>  | - | + |
| <i>Psip1</i>   | - | + |
| <i>Pskh1</i>   | - | + |
| <i>Psm1</i>    | - | + |
| <i>Psm2</i>    | - | + |
| <i>Psm3</i>    | - | + |
| <i>Psm5</i>    | - | + |
| <i>Psm6</i>    | - | + |
| <i>Psm7</i>    | - | + |
| <i>Psm1</i>    | - | + |
| <i>Psm10</i>   | - | + |
| <i>Psm2</i>    | - | + |
| <i>Psm4</i>    | - | + |
| <i>Psm5</i>    | - | + |
| <i>Psm6</i>    | - | + |
| <i>Psm7</i>    | - | + |
| <i>Psm8</i>    | - | + |
| <i>Psm9</i>    | - | + |
| <i>Psmc2</i>   | - | + |
| <i>Psmc3</i>   | - | + |
| <i>Psmc3ip</i> | - | + |
| <i>Psmc5</i>   | - | + |
| <i>Psm1</i>    | - | + |
| <i>Psm10</i>   | - | + |
| <i>Psm12</i>   | - | + |
| <i>Psm13</i>   | - | + |
| <i>Psm14</i>   | - | + |
| <i>Psm2</i>    | - | + |

|                 |   |   |
|-----------------|---|---|
| <i>Psm</i> d3   | - | + |
| <i>Psm</i> d6   | - | + |
| <i>Psm</i> d7   | - | + |
| <i>Psm</i> d8   | - | + |
| <i>Psm</i> d9   | - | + |
| <i>Psm</i> e1   | - | + |
| <i>Psm</i> e2   | - | + |
| <i>Psm</i> e3   | - | + |
| <i>Psm</i> f1   | - | + |
| <i>Psm</i> g1   | - | + |
| <i>Psm</i> g2   | - | + |
| <i>Psm</i> g3   | - | + |
| <i>Psm</i> g4   | - | + |
| <i>Psp</i> c1   | - | + |
| <i>Psp</i> h    | - | + |
| <i>Psrc</i> 1   | - | + |
| <i>Pst</i> pip1 | - | + |
| <i>Ptar</i> 1   | - | + |
| <i>Ptbp</i> 1   | - | + |
| <i>Ptbp</i> 2   | - | + |
| <i>Ptbp</i> 3   | - | + |
| <i>Ptcd</i> 1   | - | + |
| <i>Ptcd</i> 2   | - | + |
| <i>Ptcd</i> 3   | - | + |
| <i>Ptdss</i> 1  | - | + |
| <i>Pten</i>     | - | + |
| <i>Pter</i>     | - | + |
| <i>Ptger</i> 2  | - | + |
| <i>Ptges</i> 2  | - | + |
| <i>Ptges</i> 3  | - | + |
| <i>Ptges</i> 3l | - | + |
| <i>Ptgr</i> 1   | - | + |
| <i>Ptgr</i> 2   | - | + |
| <i>Ptk</i> 2b   | - | + |
| <i>Ptma</i>     | - | + |
| <i>Ptp</i> 4a2  | - | + |
| <i>Ptp</i> 4a3  | - | + |
| <i>Ptplad</i> 1 | - | + |
| <i>Ptpn</i> 1   | - | + |
| <i>Ptpn</i> 11  | - | + |
| <i>Ptpn</i> 2   | - | + |
| <i>Ptpn</i> 22  | - | + |
| <i>Ptpn</i> 23  | - | + |
| <i>Ptpn</i> 4   | - | + |
| <i>Ptpn</i> 6   | - | + |
| <i>Ptpn</i> 9   | - | + |
| <i>Ptp</i> ra   | - | + |
| <i>Ptp</i> rc   | - | + |
| <i>Ptp</i> rcap | - | + |
| <i>Ptp</i> rj   | - | + |
| <i>Pt</i> rh1   | - | + |
| <i>Pt</i> rh2   | - | + |
| <i>Pt</i> rhd1  | - | + |

|                 |   |   |
|-----------------|---|---|
| <i>Pts</i>      | - | + |
| <i>Pum1</i>     | - | + |
| <i>Pum2</i>     | - | + |
| <i>Purb</i>     | - | + |
| <i>Pus1</i>     | - | + |
| <i>Pus10</i>    | - | + |
| <i>Pus7</i>     | - | + |
| <i>Pus7l</i>    | - | + |
| <i>Pusl1</i>    | - | + |
| <i>Pvr</i>      | - | + |
| <i>Pwp1</i>     | - | + |
| <i>Pwp2</i>     | - | + |
| <i>Pwww2a</i>   | - | + |
| <i>Pxk</i>      | - | + |
| <i>Pxmp2</i>    | - | + |
| <i>Pycard</i>   | - | + |
| <i>Pycr2</i>    | - | + |
| <i>Pycl</i>     | - | + |
| <i>Pygb</i>     | - | + |
| <i>Pygo2</i>    | - | + |
| <i>Pyhin1</i>   | - | + |
| <i>Pyroxd1</i>  | - | + |
| <i>Qars</i>     | - | + |
| <i>Qk</i>       | - | + |
| <i>Qrich1</i>   | - | + |
| <i>Qrs1</i>     | - | + |
| <i>Qsox2</i>    | - | + |
| <i>Qtrt1</i>    | - | + |
| <i>Qtrtd1</i>   | - | + |
| <i>R3hcc1</i>   | - | + |
| <i>R3hcc1l</i>  | - | + |
| <i>R3hdm1</i>   | - | + |
| <i>R74862</i>   | - | + |
| <i>Rab1</i>     | - | + |
| <i>Rab10</i>    | - | + |
| <i>Rab11a</i>   | - | + |
| <i>Rab11b</i>   | - | + |
| <i>Rab14</i>    | - | + |
| <i>Rab18</i>    | - | + |
| <i>Rab19</i>    | - | + |
| <i>Rab1b</i>    | - | + |
| <i>Rab21</i>    | - | + |
| <i>Rab22a</i>   | - | + |
| <i>Rab24</i>    | - | + |
| <i>Rab27a</i>   | - | + |
| <i>Rab2b</i>    | - | + |
| <i>Rab32</i>    | - | + |
| <i>Rab33b</i>   | - | + |
| <i>Rab35</i>    | - | + |
| <i>Rab39</i>    | - | + |
| <i>Rab3a</i>    | - | + |
| <i>Rab3gap1</i> | - | + |
| <i>Rab3gap2</i> | - | + |

|                 |   |   |
|-----------------|---|---|
| <i>Rab3ip</i>   | - | + |
| <i>Rab40c</i>   | - | + |
| <i>Rab43</i>    | - | + |
| <i>Rab4b</i>    | - | + |
| <i>Rab5a</i>    | - | + |
| <i>Rab5b</i>    | - | + |
| <i>Rab8a</i>    | - | + |
| <i>Rab8b</i>    | - | + |
| <i>Rab9</i>     | - | + |
| <i>Rabac1</i>   | - | + |
| <i>Rabep2</i>   | - | + |
| <i>Rabepk</i>   | - | + |
| <i>Rabgap1</i>  | - | + |
| <i>Rabgap1l</i> | - | + |
| <i>Rabgef1</i>  | - | + |
| <i>Rabgga</i>   | - | + |
| <i>Rabggtb</i>  | - | + |
| <i>Rabif</i>    | - | + |
| <i>Rab13</i>    | - | + |
| <i>Rab15</i>    | - | + |
| <i>Rab16</i>    | - | + |
| <i>Rac1</i>     | - | + |
| <i>Rac2</i>     | - | + |
| <i>Rad1</i>     | - | + |
| <i>Rad17</i>    | - | + |
| <i>Rad18</i>    | - | + |
| <i>Rad21</i>    | - | + |
| <i>Rad23a</i>   | - | + |
| <i>Rad23b</i>   | - | + |
| <i>Rad50</i>    | - | + |
| <i>Rad51</i>    | - | + |
| <i>Rad51ap1</i> | - | + |
| <i>Rad51b</i>   | - | + |
| <i>Rad51c</i>   | - | + |
| <i>Rad52</i>    | - | + |
| <i>Rad54b</i>   | - | + |
| <i>Rad54l</i>   | - | + |
| <i>Rad9a</i>    | - | + |
| <i>Rad9b</i>    | - | + |
| <i>Rae1</i>     | - | + |
| <i>Raf1</i>     | - | + |
| <i>Rai1</i>     | - | + |
| <i>Rala</i>     | - | + |
| <i>Ralbp1</i>   | - | + |
| <i>Ralgapa1</i> | - | + |
| <i>Ralgps2</i>  | - | + |
| <i>Ran</i>      | - | + |
| <i>Ranbp1</i>   | - | + |
| <i>Ranbp2</i>   | - | + |
| <i>Ranbp9</i>   | - | + |
| <i>Rangrf</i>   | - | + |
| <i>Rap1a</i>    | - | + |
| <i>Rap1gds1</i> | - | + |

|                     |   |   |
|---------------------|---|---|
| <i>Rap2c</i>        | - | + |
| <i>Rapgef1</i>      | - | + |
| <i>Rapgef6</i>      | - | + |
| <i>Rars</i>         | - | + |
| <i>Rars2</i>        | - | + |
| <i>Rasa1</i>        | - | + |
| <i>Rasa2</i>        | - | + |
| <i>Rasa3</i>        | - | + |
| <i>Rasa4</i>        | - | + |
| <i>Rasa11</i>       | - | + |
| <i>Rasa13</i>       | - | + |
| <i>Rasgrp1</i>      | - | + |
| <i>Rasgrp2</i>      | - | + |
| <i>Rasgrp3</i>      | - | + |
| <i>Rassf2</i>       | - | + |
| <i>Rassf3</i>       | - | + |
| <i>Rassf4</i>       | - | + |
| <i>Rassf6</i>       | - | + |
| <i>Rassf7</i>       | - | + |
| <i>Raver1</i>       | - | + |
| <i>Raver1-fdx1l</i> | - | + |
| <i>Rb1cc1</i>       | - | + |
| <i>Rbak</i>         | - | + |
| <i>Rbbp4</i>        | - | + |
| <i>Rbbp5</i>        | - | + |
| <i>Rbbp6</i>        | - | + |
| <i>Rbbp7</i>        | - | + |
| <i>Rbck1</i>        | - | + |
| <i>Rbfa</i>         | - | + |
| <i>Rbks</i>         | - | + |
| <i>Rbl1</i>         | - | + |
| <i>Rbl2</i>         | - | + |
| <i>Rbm10</i>        | - | + |
| <i>Rbm12</i>        | - | + |
| <i>Rbm12b1</i>      | - | + |
| <i>Rbm12b2</i>      | - | + |
| <i>Rbm14</i>        | - | + |
| <i>Rbm15</i>        | - | + |
| <i>Rbm17</i>        | - | + |
| <i>Rbm18</i>        | - | + |
| <i>Rbm19</i>        | - | + |
| <i>Rbm22</i>        | - | + |
| <i>Rbm25</i>        | - | + |
| <i>Rbm26</i>        | - | + |
| <i>Rbm3</i>         | - | + |
| <i>Rbm33</i>        | - | + |
| <i>Rbm38</i>        | - | + |
| <i>Rbm39</i>        | - | + |
| <i>Rbm4</i>         | - | + |
| <i>Rbm41</i>        | - | + |
| <i>Rbm42</i>        | - | + |
| <i>Rbm43</i>        | - | + |
| <i>Rbm45</i>        | - | + |

|               |   |   |
|---------------|---|---|
| <i>Rbm48</i>  | - | + |
| <i>Rbm4b</i>  | - | + |
| <i>Rbm5</i>   | - | + |
| <i>Rbm8a</i>  | - | + |
| <i>Rbmx</i>   | - | + |
| <i>Rbmx2</i>  | - | + |
| <i>Rbmxl1</i> | - | + |
| <i>Rbx1</i>   | - | + |
| <i>Rc3h2</i>  | - | + |
| <i>Rcbtb2</i> | - | + |
| <i>Rcc1</i>   | - | + |
| <i>Rcc2</i>   | - | + |
| <i>Rccd1</i>  | - | + |
| <i>Rce1</i>   | - | + |
| <i>Rchy1</i>  | - | + |
| <i>Rcor1</i>  | - | + |
| <i>Rcor3</i>  | - | + |
| <i>Rcsd1</i>  | - | + |
| <i>Rdh10</i>  | - | + |
| <i>Rdh11</i>  | - | + |
| <i>Rdh12</i>  | - | + |
| <i>Rdh13</i>  | - | + |
| <i>Rdh14</i>  | - | + |
| <i>Rdm1</i>   | - | + |
| <i>Recql</i>  | - | + |
| <i>Recql4</i> | - | + |
| <i>Recql5</i> | - | + |
| <i>Reep2</i>  | - | + |
| <i>Reep3</i>  | - | + |
| <i>Rel</i>    | - | + |
| <i>Rela</i>   | - | + |
| <i>Relb</i>   | - | + |
| <i>Rel1</i>   | - | + |
| <i>Rel2</i>   | - | + |
| <i>Relt</i>   | - | + |
| <i>Reps1</i>  | - | + |
| <i>Rer1</i>   | - | + |
| <i>Rest</i>   | - | + |
| <i>Retsat</i> | - | + |
| <i>Rev1</i>   | - | + |
| <i>Rev3l</i>  | - | + |
| <i>Rexo1</i>  | - | + |
| <i>Rexo2</i>  | - | + |
| <i>Rexo4</i>  | - | + |
| <i>Rfc1</i>   | - | + |
| <i>Rfc2</i>   | - | + |
| <i>Rfc3</i>   | - | + |
| <i>Rfc4</i>   | - | + |
| <i>Rfc5</i>   | - | + |
| <i>Rffl</i>   | - | + |
| <i>Rfng</i>   | - | + |
| <i>Rft1</i>   | - | + |
| <i>Rftn1</i>  | - | + |

|                 |   |   |
|-----------------|---|---|
| <i>Rfwd2</i>    | - | + |
| <i>Rfx1</i>     | - | + |
| <i>Rfx5</i>     | - | + |
| <i>Rfx7</i>     | - | + |
| <i>Rfxank</i>   | - | + |
| <i>Rfxap</i>    | - | + |
| <i>Rgl2</i>     | - | + |
| <i>Rgp1</i>     | - | + |
| <i>Rgs1</i>     | - | + |
| <i>Rgs13</i>    | - | + |
| <i>Rgs14</i>    | - | + |
| <i>Rgs18</i>    | - | + |
| <i>Rgs19</i>    | - | + |
| <i>Rgs2</i>     | - | + |
| <i>Rhbdd3</i>   | - | + |
| <i>Rhbdf2</i>   | - | + |
| <i>Rheb</i>     | - | + |
| <i>Rhebl1</i>   | - | + |
| <i>Rhno1</i>    | - | + |
| <i>Rhoa</i>     | - | + |
| <i>Rhobtb2</i>  | - | + |
| <i>Rhof</i>     | - | + |
| <i>Rhog</i>     | - | + |
| <i>Rhoh</i>     | - | + |
| <i>Rhoq</i>     | - | + |
| <i>Rhot2</i>    | - | + |
| <i>Ribc1</i>    | - | + |
| <i>Ric8</i>     | - | + |
| <i>Ric8b</i>    | - | + |
| <i>Rilp</i>     | - | + |
| <i>Rilpl2</i>   | - | + |
| <i>Ring1</i>    | - | + |
| <i>Rint1</i>    | - | + |
| <i>Riok1</i>    | - | + |
| <i>Riok2</i>    | - | + |
| <i>Riok3</i>    | - | + |
| <i>Ripk1</i>    | - | + |
| <i>Ripk2</i>    | - | + |
| <i>Rit1</i>     | - | + |
| <i>Rmdn2</i>    | - | + |
| <i>Rmi1</i>     | - | + |
| <i>Rmi2</i>     | - | + |
| <i>Rmnd1</i>    | - | + |
| <i>Rmnd5b</i>   | - | + |
| <i>Rmrp</i>     | - | + |
| <i>Rnase4</i>   | - | + |
| <i>Rnase6</i>   | - | + |
| <i>Rnaseh1</i>  | - | + |
| <i>Rnaseh2a</i> | - | + |
| <i>Rnaseh2b</i> | - | + |
| <i>Rnaseh2c</i> | - | + |
| <i>Rnasek</i>   | - | + |
| <i>Rnf10</i>    | - | + |



|                 |   |   |
|-----------------|---|---|
| <i>Rnf111</i>   | - | + |
| <i>Rnf113a1</i> | - | + |
| <i>Rnf113a2</i> | - | + |
| <i>Rnf114</i>   | - | + |
| <i>Rnf115</i>   | - | + |
| <i>Rnf121</i>   | - | + |
| <i>Rnf122</i>   | - | + |
| <i>Rnf123</i>   | - | + |
| <i>Rnf126</i>   | - | + |
| <i>Rnf13</i>    | - | + |
| <i>Rnf135</i>   | - | + |
| <i>Rnf138</i>   | - | + |
| <i>Rnf139</i>   | - | + |
| <i>Rnf141</i>   | - | + |
| <i>Rnf145</i>   | - | + |
| <i>Rnf151</i>   | - | + |
| <i>Rnf157</i>   | - | + |
| <i>Rnf166</i>   | - | + |
| <i>Rnf167</i>   | - | + |
| <i>Rnf168</i>   | - | + |
| <i>Rnf170</i>   | - | + |
| <i>Rnf181</i>   | - | + |
| <i>Rnf185</i>   | - | + |
| <i>Rnf19b</i>   | - | + |
| <i>Rnf20</i>    | - | + |
| <i>Rnf214</i>   | - | + |
| <i>Rnf215</i>   | - | + |
| <i>Rnf216</i>   | - | + |
| <i>Rnf24</i>    | - | + |
| <i>Rnf25</i>    | - | + |
| <i>Rnf26</i>    | - | + |
| <i>Rnf31</i>    | - | + |
| <i>Rnf34</i>    | - | + |
| <i>Rnf38</i>    | - | + |
| <i>Rnf4</i>     | - | + |
| <i>Rnf40</i>    | - | + |
| <i>Rnf41</i>    | - | + |
| <i>Rnf43</i>    | - | + |
| <i>Rnf44</i>    | - | + |
| <i>Rnf5</i>     | - | + |
| <i>Rnf6</i>     | - | + |
| <i>Rnf8</i>     | - | + |
| <i>Rnft2</i>    | - | + |
| <i>Rngtt</i>    | - | + |
| <i>Rnh1</i>     | - | + |
| <i>Rnmt</i>     | - | + |
| <i>Rnmtl1</i>   | - | + |
| <i>Rnpc3</i>    | - | + |
| <i>Rnpep</i>    | - | + |
| <i>Rnpepl1</i>  | - | + |
| <i>Rnps1</i>    | - | + |
| <i>Rnu11</i>    | - | + |
| <i>Rnu12</i>    | - | + |

|                  |   |   |
|------------------|---|---|
| <i>Rnu73b</i>    | - | + |
| <i>Rogdi</i>     | - | + |
| <i>Rom1</i>      | - | + |
| <i>Romo1</i>     | - | + |
| <i>Ropn1l</i>    | - | + |
| <i>Rp2h</i>      | - | + |
| <i>Rp9</i>       | - | + |
| <i>Rpa1</i>      | - | + |
| <i>Rpa2</i>      | - | + |
| <i>Rpa3</i>      | - | + |
| <i>Rpain</i>     | - | + |
| <i>Rpap2</i>     | - | + |
| <i>Rpap3</i>     | - | + |
| <i>Rpf2</i>      | - | + |
| <i>Rpgr</i>      | - | + |
| <i>Rpgrip1l</i>  | - | + |
| <i>Rpia</i>      | - | + |
| <i>Rpl10</i>     | - | + |
| <i>Rpl12</i>     | - | + |
| <i>Rpl13</i>     | - | + |
| <i>Rpl13a</i>    | - | + |
| <i>Rpl14</i>     | - | + |
| <i>Rpl15</i>     | - | + |
| <i>Rpl18</i>     | - | + |
| <i>Rpl21</i>     | - | + |
| <i>Rpl22l1</i>   | - | + |
| <i>Rpl23</i>     | - | + |
| <i>Rpl24</i>     | - | + |
| <i>Rpl27a</i>    | - | + |
| <i>Rpl28</i>     | - | + |
| <i>Rpl29</i>     | - | + |
| <i>Rpl30</i>     | - | + |
| <i>Rpl32</i>     | - | + |
| <i>Rpl34</i>     | - | + |
| <i>Rpl34-ps1</i> | - | + |
| <i>Rpl35</i>     | - | + |
| <i>Rpl36</i>     | - | + |
| <i>Rpl36a</i>    | - | + |
| <i>Rpl36al</i>   | - | + |
| <i>Rpl37</i>     | - | + |
| <i>Rpl37a</i>    | - | + |
| <i>Rpl39</i>     | - | + |
| <i>Rpl4</i>      | - | + |
| <i>Rpl41</i>     | - | + |
| <i>Rpl7</i>      | - | + |
| <i>Rpl7a</i>     | - | + |
| <i>Rpl7l1</i>    | - | + |
| <i>Rpl8</i>      | - | + |
| <i>Rpl9</i>      | - | + |
| <i>Rplp0</i>     | - | + |
| <i>Rplp1</i>     | - | + |
| <i>Rplp2</i>     | - | + |
| <i>Rpn2</i>      | - | + |

|                 |   |   |
|-----------------|---|---|
| <i>Rpp14</i>    | - | + |
| <i>Rpp25l</i>   | - | + |
| <i>Rpph1</i>    | - | + |
| <i>Rprd1a</i>   | - | + |
| <i>Rprd1b</i>   | - | + |
| <i>Rprd2</i>    | - | + |
| <i>Rps10</i>    | - | + |
| <i>Rps11</i>    | - | + |
| <i>Rps12</i>    | - | + |
| <i>Rps13</i>    | - | + |
| <i>Rps14</i>    | - | + |
| <i>Rps15a</i>   | - | + |
| <i>Rps16</i>    | - | + |
| <i>Rps18</i>    | - | + |
| <i>Rps19bp1</i> | - | + |
| <i>Rps2</i>     | - | + |
| <i>Rps21</i>    | - | + |
| <i>Rps23</i>    | - | + |
| <i>Rps24</i>    | - | + |
| <i>Rps25</i>    | - | + |
| <i>Rps27</i>    | - | + |
| <i>Rps27a</i>   | - | + |
| <i>Rps28</i>    | - | + |
| <i>Rps3a1</i>   | - | + |
| <i>Rps4x</i>    | - | + |
| <i>Rps5</i>     | - | + |
| <i>Rps6</i>     | - | + |
| <i>Rps6ka1</i>  | - | + |
| <i>Rps6ka4</i>  | - | + |
| <i>Rps6ka5</i>  | - | + |
| <i>Rps6kb1</i>  | - | + |
| <i>Rps6kb2</i>  | - | + |
| <i>Rps7</i>     | - | + |
| <i>Rps8</i>     | - | + |
| <i>Rps9</i>     | - | + |
| <i>Rpsa</i>     | - | + |
| <i>Rpusd1</i>   | - | + |
| <i>Rpusd3</i>   | - | + |
| <i>Rpusd4</i>   | - | + |
| <i>Rqcd1</i>    | - | + |
| <i>Rrad</i>     | - | + |
| <i>Rragc</i>    | - | + |
| <i>Rras2</i>    | - | + |
| <i>Rrbp1</i>    | - | + |
| <i>Rrm1</i>     | - | + |
| <i>Rrm2</i>     | - | + |
| <i>Rrm2b</i>    | - | + |
| <i>Rrn3</i>     | - | + |
| <i>Rrnad1</i>   | - | + |
| <i>Rrp1</i>     | - | + |
| <i>Rrp12</i>    | - | + |
| <i>Rrp15</i>    | - | + |
| <i>Rrp1b</i>    | - | + |

|                |   |   |
|----------------|---|---|
| <i>Rrp36</i>   | - | + |
| <i>Rrp7a</i>   | - | + |
| <i>Rrp8</i>    | - | + |
| <i>Rrp9</i>    | - | + |
| <i>Rrs1</i>    | - | + |
| <i>Rs1</i>     | - | + |
| <i>Rsad1</i>   | - | + |
| <i>Rsb1</i>    | - | + |
| <i>Rsb1l</i>   | - | + |
| <i>Rsf1</i>    | - | + |
| <i>Rsg1</i>    | - | + |
| <i>Rsl1</i>    | - | + |
| <i>Rsl1d1</i>  | - | + |
| <i>Rsl24d1</i> | - | + |
| <i>Rsph1</i>   | - | + |
| <i>Rsph3a</i>  | - | + |
| <i>Rsph3b</i>  | - | + |
| <i>Rspry1</i>  | - | + |
| <i>Rsrc2</i>   | - | + |
| <i>Rsu1</i>    | - | + |
| <i>Rtca</i>    | - | + |
| <i>Rtfdc1</i>  | - | + |
| <i>Rtn3</i>    | - | + |
| <i>Rtn4</i>    | - | + |
| <i>Rtn4ip1</i> | - | + |
| <i>Rufy1</i>   | - | + |
| <i>Rufy2</i>   | - | + |
| <i>Rundc1</i>  | - | + |
| <i>Runx1</i>   | - | + |
| <i>Ruvbl1</i>  | - | + |
| <i>Ruvbl2</i>  | - | + |
| <i>Rwdd1</i>   | - | + |
| <i>Rwdd2a</i>  | - | + |
| <i>Rwdd3</i>   | - | + |
| <i>Rwdd4a</i>  | - | + |
| <i>Rxrb</i>    | - | + |
| <i>S100a11</i> | - | + |
| <i>S100pbp</i> | - | + |
| <i>S1pr2</i>   | - | + |
| <i>S1pr3</i>   | - | + |
| <i>S1pr4</i>   | - | + |
| <i>Sac3d1</i>  | - | + |
| <i>Sacm1l</i>  | - | + |
| <i>Safb</i>    | - | + |
| <i>Safb2</i>   | - | + |
| <i>Samd1</i>   | - | + |
| <i>Samd10</i>  | - | + |
| <i>Samd4b</i>  | - | + |
| <i>Samd8</i>   | - | + |
| <i>Samd9l</i>  | - | + |
| <i>Samhd1</i>  | - | + |
| <i>Samm50</i>  | - | + |
| <i>Samsn1</i>  | - | + |

|                 |   |   |
|-----------------|---|---|
| <i>Sap18</i>    | - | + |
| <i>Sap30</i>    | - | + |
| <i>Sap30bp</i>  | - | + |
| <i>Sapcd2</i>   | - | + |
| <i>Sar1a</i>    | - | + |
| <i>Sar1b</i>    | - | + |
| <i>Sarnp</i>    | - | + |
| <i>Sars</i>     | - | + |
| <i>Sars2</i>    | - | + |
| <i>Sart1</i>    | - | + |
| <i>Sart3</i>    | - | + |
| <i>Sash3</i>    | - | + |
| <i>Sass6</i>    | - | + |
| <i>Sat1</i>     | - | + |
| <i>Sav1</i>     | - | + |
| <i>Sbds</i>     | - | + |
| <i>Sbf1</i>     | - | + |
| <i>Sbk1</i>     | - | + |
| <i>Sbno1</i>    | - | + |
| <i>Sbno2</i>    | - | + |
| <i>Sc4mol</i>   | - | + |
| <i>Sc5d</i>     | - | + |
| <i>Scaf11</i>   | - | + |
| <i>Scaf4</i>    | - | + |
| <i>Scaf8</i>    | - | + |
| <i>Scai</i>     | - | + |
| <i>Scamp2</i>   | - | + |
| <i>Scamp3</i>   | - | + |
| <i>Scand1</i>   | - | + |
| <i>Scap</i>     | - | + |
| <i>Scaper</i>   | - | + |
| <i>Scarb1</i>   | - | + |
| <i>Scarb2</i>   | - | + |
| <i>Scarna13</i> | - | + |
| <i>Scarna17</i> | - | + |
| <i>Scd1</i>     | - | + |
| <i>Scd2</i>     | - | + |
| <i>Scfd1</i>    | - | + |
| <i>Scfd2</i>    | - | + |
| <i>Scimp</i>    | - | + |
| <i>Sclt1</i>    | - | + |
| <i>Scly</i>     | - | + |
| <i>Scmh1</i>    | - | + |
| <i>Scnm1</i>    | - | + |
| <i>Sco1</i>     | - | + |
| <i>Scp2</i>     | - | + |
| <i>Scrib</i>    | - | + |
| <i>Scrn3</i>    | - | + |
| <i>Scyl1</i>    | - | + |
| <i>Scyl3</i>    | - | + |
| <i>Sdad1</i>    | - | + |
| <i>Sdccag3</i>  | - | + |
| <i>Sdccag8</i>  | - | + |

|                  |   |   |
|------------------|---|---|
| <i>Sde2</i>      | - | + |
| <i>Sdf2</i>      | - | + |
| <i>Sdf2l1</i>    | - | + |
| <i>Sdf4</i>      | - | + |
| <i>Sdha</i>      | - | + |
| <i>Sdhaf1</i>    | - | + |
| <i>Sdhaf2</i>    | - | + |
| <i>Sdhb</i>      | - | + |
| <i>Sdhd</i>      | - | + |
| <i>Sec11c</i>    | - | + |
| <i>Sec14l1</i>   | - | + |
| <i>Sec16a</i>    | - | + |
| <i>Sec22b</i>    | - | + |
| <i>Sec23a</i>    | - | + |
| <i>Sec24a</i>    | - | + |
| <i>Sec24b</i>    | - | + |
| <i>Sec31a</i>    | - | + |
| <i>Sec61a1</i>   | - | + |
| <i>Sec61b</i>    | - | + |
| <i>Sec61g</i>    | - | + |
| <i>Secisbp2</i>  | - | + |
| <i>Seh1l</i>     | - | + |
| <i>Selk</i>      | - | + |
| <i>Selrc1</i>    | - | + |
| <i>Sema4b</i>    | - | + |
| <i>Sema4d</i>    | - | + |
| <i>Sema7a</i>    | - | + |
| <i>Senp1</i>     | - | + |
| <i>Senp2</i>     | - | + |
| <i>Senp5</i>     | - | + |
| <i>Senp6</i>     | - | + |
| <i>Senp7</i>     | - | + |
| <i>Sep15</i>     | - | + |
| <i>Sephs2</i>    | - | + |
| <i>Sepp1</i>     | - | + |
| <i>Sept1</i>     | - | + |
| <i>Sept11</i>    | - | + |
| <i>Sept2</i>     | - | + |
| <i>Sept6</i>     | - | + |
| <i>Sept7</i>     | - | + |
| <i>Serac1</i>    | - | + |
| <i>Serbp1</i>    | - | + |
| <i>Serf2</i>     | - | + |
| <i>Serhl</i>     | - | + |
| <i>Serinc3</i>   | - | + |
| <i>Serinc4</i>   | - | + |
| <i>Serp1</i>     | - | + |
| <i>Serpinb6b</i> | - | + |
| <i>Serpinb9</i>  | - | + |
| <i>Sertad1</i>   | - | + |
| <i>Sertad2</i>   | - | + |
| <i>Sertad3</i>   | - | + |
| <i>Sesn3</i>     | - | + |

|                 |   |   |
|-----------------|---|---|
| <i>Set</i>      | - | + |
| <i>Setd1a</i>   | - | + |
| <i>Setd1b</i>   | - | + |
| <i>Setd2</i>    | - | + |
| <i>Setd3</i>    | - | + |
| <i>Setd5</i>    | - | + |
| <i>Setd6</i>    | - | + |
| <i>Setd8</i>    | - | + |
| <i>Setdb1</i>   | - | + |
| <i>Setdb2</i>   | - | + |
| <i>Sf1</i>      | - | + |
| <i>Sf3a1</i>    | - | + |
| <i>Sf3a2</i>    | - | + |
| <i>Sf3a3</i>    | - | + |
| <i>Sf3b1</i>    | - | + |
| <i>Sf3b3</i>    | - | + |
| <i>Sf3b4</i>    | - | + |
| <i>Sf3b5</i>    | - | + |
| <i>Sfmbt1</i>   | - | + |
| <i>Sfpi1</i>    | - | + |
| <i>Sfpq</i>     | - | + |
| <i>Sfrs18</i>   | - | + |
| <i>Sft2d1</i>   | - | + |
| <i>Sft2d2</i>   | - | + |
| <i>Sft2d3</i>   | - | + |
| <i>Sfxn2</i>    | - | + |
| <i>Sfxn4</i>    | - | + |
| <i>Sgk3</i>     | - | + |
| <i>Sgol1</i>    | - | + |
| <i>Sgol2</i>    | - | + |
| <i>Sgpp1</i>    | - | + |
| <i>Sgsh</i>     | - | + |
| <i>Sgsm2</i>    | - | + |
| <i>Sgta</i>     | - | + |
| <i>Sh2b1</i>    | - | + |
| <i>Sh2b2</i>    | - | + |
| <i>Sh2b3</i>    | - | + |
| <i>Sh2d3c</i>   | - | + |
| <i>Sh3bgrl</i>  | - | + |
| <i>Sh3bgrl3</i> | - | + |
| <i>Sh3bp1</i>   | - | + |
| <i>Sh3bp2</i>   | - | + |
| <i>Sh3bp5</i>   | - | + |
| <i>Sh3bp5l</i>  | - | + |
| <i>Sh3d21</i>   | - | + |
| <i>Sh3gl1</i>   | - | + |
| <i>Sh3glb1</i>  | - | + |
| <i>Sh3glb2</i>  | - | + |
| <i>Sh3kbp1</i>  | - | + |
| <i>Sh3pxd2a</i> | - | + |
| <i>Sharpin</i>  | - | + |
| <i>Shc1</i>     | - | + |
| <i>Shcbp1</i>   | - | + |

|                |   |   |
|----------------|---|---|
| <i>Shcbp1l</i> | - | + |
| <i>Shisa5</i>  | - | + |
| <i>Shkbp1</i>  | - | + |
| <i>Shoc2</i>   | - | + |
| <i>Shpk</i>    | - | + |
| <i>Siah1b</i>  | - | + |
| <i>Siah2</i>   | - | + |
| <i>Sidt2</i>   | - | + |
| <i>Sigirr</i>  | - | + |
| <i>Siglecg</i> | - | + |
| <i>Sik1</i>    | - | + |
| <i>Sik3</i>    | - | + |
| <i>Sil1</i>    | - | + |
| <i>Sin3a</i>   | - | + |
| <i>Sin3b</i>   | - | + |
| <i>Sipa1</i>   | - | + |
| <i>Sipa11</i>  | - | + |
| <i>Sipa13</i>  | - | + |
| <i>Sirt1</i>   | - | + |
| <i>Sirt2</i>   | - | + |
| <i>Sirt3</i>   | - | + |
| <i>Sirt4</i>   | - | + |
| <i>Sirt7</i>   | - | + |
| <i>Sit1</i>    | - | + |
| <i>Siva1</i>   | - | + |
| <i>Ska1</i>    | - | + |
| <i>Ska2</i>    | - | + |
| <i>Ska3</i>    | - | + |
| <i>Skil</i>    | - | + |
| <i>Skiv2l</i>  | - | + |
| <i>Skiv2l2</i> | - | + |
| <i>Skp1a</i>   | - | + |
| <i>Skp2</i>    | - | + |
| <i>Sla</i>     | - | + |
| <i>Slain1</i>  | - | + |
| <i>Slamf1</i>  | - | + |
| <i>Slamf6</i>  | - | + |
| <i>Slbp</i>    | - | + |
| <i>Slc10a7</i> | - | + |
| <i>Slc12a2</i> | - | + |
| <i>Slc12a6</i> | - | + |
| <i>Slc12a7</i> | - | + |
| <i>Slc14a1</i> | - | + |
| <i>Slc15a4</i> | - | + |
| <i>Slc16a1</i> | - | + |
| <i>Slc16a6</i> | - | + |
| <i>Slc17a5</i> | - | + |
| <i>Slc17a9</i> | - | + |
| <i>Slc19a1</i> | - | + |
| <i>Slc1a4</i>  | - | + |
| <i>Slc1a5</i>  | - | + |
| <i>Slc20a1</i> | - | + |
| <i>Slc20a2</i> | - | + |



|                 |   |   |
|-----------------|---|---|
| <i>Slc22a5</i>  | - | + |
| <i>Slc24a6</i>  | - | + |
| <i>Slc25a1</i>  | - | + |
| <i>Slc25a10</i> | - | + |
| <i>Slc25a11</i> | - | + |
| <i>Slc25a12</i> | - | + |
| <i>Slc25a13</i> | - | + |
| <i>Slc25a14</i> | - | + |
| <i>Slc25a15</i> | - | + |
| <i>Slc25a16</i> | - | + |
| <i>Slc25a17</i> | - | + |
| <i>Slc25a19</i> | - | + |
| <i>Slc25a20</i> | - | + |
| <i>Slc25a22</i> | - | + |
| <i>Slc25a25</i> | - | + |
| <i>Slc25a26</i> | - | + |
| <i>Slc25a28</i> | - | + |
| <i>Slc25a29</i> | - | + |
| <i>Slc25a3</i>  | - | + |
| <i>Slc25a32</i> | - | + |
| <i>Slc25a36</i> | - | + |
| <i>Slc25a37</i> | - | + |
| <i>Slc25a38</i> | - | + |
| <i>Slc25a39</i> | - | + |
| <i>Slc25a40</i> | - | + |
| <i>Slc25a42</i> | - | + |
| <i>Slc25a45</i> | - | + |
| <i>Slc25a5</i>  | - | + |
| <i>Slc25a51</i> | - | + |
| <i>Slc25a53</i> | - | + |
| <i>Slc26a11</i> | - | + |
| <i>Slc26a6</i>  | - | + |
| <i>Slc27a1</i>  | - | + |
| <i>Slc29a2</i>  | - | + |
| <i>Slc29a3</i>  | - | + |
| <i>Slc2a1</i>   | - | + |
| <i>Slc2a3</i>   | - | + |
| <i>Slc2a6</i>   | - | + |
| <i>Slc2a9</i>   | - | + |
| <i>Slc30a1</i>  | - | + |
| <i>Slc30a6</i>  | - | + |
| <i>Slc30a7</i>  | - | + |
| <i>Slc30a9</i>  | - | + |
| <i>Slc31a1</i>  | - | + |
| <i>Slc31a2</i>  | - | + |
| <i>Slc35a2</i>  | - | + |
| <i>Slc35a4</i>  | - | + |
| <i>Slc35a5</i>  | - | + |
| <i>Slc35b1</i>  | - | + |
| <i>Slc35b2</i>  | - | + |
| <i>Slc35b3</i>  | - | + |
| <i>Slc35b4</i>  | - | + |
| <i>Slc35c1</i>  | - | + |

|                 |   |   |
|-----------------|---|---|
| <i>Slc35c2</i>  | - | + |
| <i>Slc35d1</i>  | - | + |
| <i>Slc35d2</i>  | - | + |
| <i>Slc35e1</i>  | - | + |
| <i>Slc35e2</i>  | - | + |
| <i>Slc35e3</i>  | - | + |
| <i>Slc35f2</i>  | - | + |
| <i>Slc35g1</i>  | - | + |
| <i>Slc37a1</i>  | - | + |
| <i>Slc37a2</i>  | - | + |
| <i>Slc37a3</i>  | - | + |
| <i>Slc37a4</i>  | - | + |
| <i>Slc38a1</i>  | - | + |
| <i>Slc38a10</i> | - | + |
| <i>Slc38a6</i>  | - | + |
| <i>Slc38a7</i>  | - | + |
| <i>Slc38a9</i>  | - | + |
| <i>Slc39a1</i>  | - | + |
| <i>Slc39a10</i> | - | + |
| <i>Slc39a11</i> | - | + |
| <i>Slc39a13</i> | - | + |
| <i>Slc39a6</i>  | - | + |
| <i>Slc39a7</i>  | - | + |
| <i>Slc39a9</i>  | - | + |
| <i>Slc3a2</i>   | - | + |
| <i>Slc41a1</i>  | - | + |
| <i>Slc41a2</i>  | - | + |
| <i>Slc41a3</i>  | - | + |
| <i>Slc43a2</i>  | - | + |
| <i>Slc43a3</i>  | - | + |
| <i>Slc44a2</i>  | - | + |
| <i>Slc46a1</i>  | - | + |
| <i>Slc46a3</i>  | - | + |
| <i>Slc48a1</i>  | - | + |
| <i>Slc4a1ap</i> | - | + |
| <i>Slc4a2</i>   | - | + |
| <i>Slc4a7</i>   | - | + |
| <i>Slc52a2</i>  | - | + |
| <i>Slc5a6</i>   | - | + |
| <i>Slc6a6</i>   | - | + |
| <i>Slc7a1</i>   | - | + |
| <i>Slc7a5</i>   | - | + |
| <i>Slc7a6</i>   | - | + |
| <i>Slc7a6os</i> | - | + |
| <i>Slc9a3r1</i> | - | + |
| <i>Slc9a6</i>   | - | + |
| <i>Slc9a7</i>   | - | + |
| <i>Slc9a8</i>   | - | + |
| <i>Slc9a9</i>   | - | + |
| <i>Sln2</i>     | - | + |
| <i>Sln3</i>     | - | + |
| <i>Sln9</i>     | - | + |
| <i>Slirp</i>    | - | + |

|                  |   |   |
|------------------|---|---|
| <i>Slk</i>       | - | + |
| <i>Slmo2</i>     | - | + |
| <i>Sltm</i>      | - | + |
| <i>Slx1b</i>     | - | + |
| <i>Slx4</i>      | - | + |
| <i>Slx4ip</i>    | - | + |
| <i>Smad2</i>     | - | + |
| <i>Smad4</i>     | - | + |
| <i>Smagp</i>     | - | + |
| <i>Smap1</i>     | - | + |
| <i>Smap2</i>     | - | + |
| <i>Smarca4</i>   | - | + |
| <i>Smarca5</i>   | - | + |
| <i>Smarca6</i>   | - | + |
| <i>Smarca7</i>   | - | + |
| <i>Smarca8</i>   | - | + |
| <i>Smarca9</i>   | - | + |
| <i>Smarca10</i>  | - | + |
| <i>Smarca11</i>  | - | + |
| <i>Smarca12</i>  | - | + |
| <i>Smarca13</i>  | - | + |
| <i>Smarca14</i>  | - | + |
| <i>Smarca15</i>  | - | + |
| <i>Smarca16</i>  | - | + |
| <i>Smarca17</i>  | - | + |
| <i>Smarca18</i>  | - | + |
| <i>Smarca19</i>  | - | + |
| <i>Smarca20</i>  | - | + |
| <i>Smarca21</i>  | - | + |
| <i>Smarca22</i>  | - | + |
| <i>Smarca23</i>  | - | + |
| <i>Smarca24</i>  | - | + |
| <i>Smarca25</i>  | - | + |
| <i>Smarca26</i>  | - | + |
| <i>Smarca27</i>  | - | + |
| <i>Smarca28</i>  | - | + |
| <i>Smarca29</i>  | - | + |
| <i>Smarca30</i>  | - | + |
| <i>Smarca31</i>  | - | + |
| <i>Smarca32</i>  | - | + |
| <i>Smarca33</i>  | - | + |
| <i>Smarca34</i>  | - | + |
| <i>Smarca35</i>  | - | + |
| <i>Smarca36</i>  | - | + |
| <i>Smarca37</i>  | - | + |
| <i>Smarca38</i>  | - | + |
| <i>Smarca39</i>  | - | + |
| <i>Smarca40</i>  | - | + |
| <i>Smarca41</i>  | - | + |
| <i>Smarca42</i>  | - | + |
| <i>Smarca43</i>  | - | + |
| <i>Smarca44</i>  | - | + |
| <i>Smarca45</i>  | - | + |
| <i>Smarca46</i>  | - | + |
| <i>Smarca47</i>  | - | + |
| <i>Smarca48</i>  | - | + |
| <i>Smarca49</i>  | - | + |
| <i>Smarca50</i>  | - | + |
| <i>Smarca51</i>  | - | + |
| <i>Smarca52</i>  | - | + |
| <i>Smarca53</i>  | - | + |
| <i>Smarca54</i>  | - | + |
| <i>Smarca55</i>  | - | + |
| <i>Smarca56</i>  | - | + |
| <i>Smarca57</i>  | - | + |
| <i>Smarca58</i>  | - | + |
| <i>Smarca59</i>  | - | + |
| <i>Smarca60</i>  | - | + |
| <i>Smarca61</i>  | - | + |
| <i>Smarca62</i>  | - | + |
| <i>Smarca63</i>  | - | + |
| <i>Smarca64</i>  | - | + |
| <i>Smarca65</i>  | - | + |
| <i>Smarca66</i>  | - | + |
| <i>Smarca67</i>  | - | + |
| <i>Smarca68</i>  | - | + |
| <i>Smarca69</i>  | - | + |
| <i>Smarca70</i>  | - | + |
| <i>Smarca71</i>  | - | + |
| <i>Smarca72</i>  | - | + |
| <i>Smarca73</i>  | - | + |
| <i>Smarca74</i>  | - | + |
| <i>Smarca75</i>  | - | + |
| <i>Smarca76</i>  | - | + |
| <i>Smarca77</i>  | - | + |
| <i>Smarca78</i>  | - | + |
| <i>Smarca79</i>  | - | + |
| <i>Smarca80</i>  | - | + |
| <i>Smarca81</i>  | - | + |
| <i>Smarca82</i>  | - | + |
| <i>Smarca83</i>  | - | + |
| <i>Smarca84</i>  | - | + |
| <i>Smarca85</i>  | - | + |
| <i>Smarca86</i>  | - | + |
| <i>Smarca87</i>  | - | + |
| <i>Smarca88</i>  | - | + |
| <i>Smarca89</i>  | - | + |
| <i>Smarca90</i>  | - | + |
| <i>Smarca91</i>  | - | + |
| <i>Smarca92</i>  | - | + |
| <i>Smarca93</i>  | - | + |
| <i>Smarca94</i>  | - | + |
| <i>Smarca95</i>  | - | + |
| <i>Smarca96</i>  | - | + |
| <i>Smarca97</i>  | - | + |
| <i>Smarca98</i>  | - | + |
| <i>Smarca99</i>  | - | + |
| <i>Smarca100</i> | - | + |

|                 |   |   |
|-----------------|---|---|
| <i>Snapi</i>    | - | + |
| <i>Snd1</i>     | - | + |
| <i>Snhg1</i>    | - | + |
| <i>Snhg10</i>   | - | + |
| <i>Snhg12</i>   | - | + |
| <i>Snhg3</i>    | - | + |
| <i>Snhg5</i>    | - | + |
| <i>Snhg6</i>    | - | + |
| <i>Snhg7</i>    | - | + |
| <i>Snhg8</i>    | - | + |
| <i>Snhg9</i>    | - | + |
| <i>Snip1</i>    | - | + |
| <i>Snn</i>      | - | + |
| <i>Snora16a</i> | - | + |
| <i>Snora17</i>  | - | + |
| <i>Snora21</i>  | - | + |
| <i>Snora24</i>  | - | + |
| <i>Snora26</i>  | - | + |
| <i>Snora28</i>  | - | + |
| <i>Snora3</i>   | - | + |
| <i>Snora31</i>  | - | + |
| <i>Snora33</i>  | - | + |
| <i>Snora41</i>  | - | + |
| <i>Snora43</i>  | - | + |
| <i>Snora44</i>  | - | + |
| <i>Snora52</i>  | - | + |
| <i>Snora61</i>  | - | + |
| <i>Snora64</i>  | - | + |
| <i>Snora65</i>  | - | + |
| <i>Snora69</i>  | - | + |
| <i>Snora70</i>  | - | + |
| <i>Snora78</i>  | - | + |
| <i>Snora7a</i>  | - | + |
| <i>Snord100</i> | - | + |
| <i>Snord104</i> | - | + |
| <i>Snord110</i> | - | + |
| <i>Snord12</i>  | - | + |
| <i>Snord16a</i> | - | + |
| <i>Snord1c</i>  | - | + |
| <i>Snord2</i>   | - | + |
| <i>Snord22</i>  | - | + |
| <i>Snord32a</i> | - | + |
| <i>Snord33</i>  | - | + |
| <i>Snord34</i>  | - | + |
| <i>Snord35a</i> | - | + |
| <i>Snord35b</i> | - | + |
| <i>Snord37</i>  | - | + |
| <i>Snord38a</i> | - | + |
| <i>Snord45b</i> | - | + |
| <i>Snord45c</i> | - | + |
| <i>Snord49a</i> | - | + |
| <i>Snord49b</i> | - | + |
| <i>Snord52</i>  | - | + |

|                 |   |   |
|-----------------|---|---|
| <i>Snord55</i>  | - | + |
| <i>Snord61</i>  | - | + |
| <i>Snord65</i>  | - | + |
| <i>Snord68</i>  | - | + |
| <i>Snord72</i>  | - | + |
| <i>Snord87</i>  | - | + |
| <i>Snord93</i>  | - | + |
| <i>Snord96a</i> | - | + |
| <i>Snord99</i>  | - | + |
| <i>Snrnp200</i> | - | + |
| <i>Snrnp25</i>  | - | + |
| <i>Snrnp27</i>  | - | + |
| <i>Snrnp35</i>  | - | + |
| <i>Snrnp40</i>  | - | + |
| <i>Snrpa</i>    | - | + |
| <i>Snrpa1</i>   | - | + |
| <i>Snrpd1</i>   | - | + |
| <i>Snrpd3</i>   | - | + |
| <i>Snrpe</i>    | - | + |
| <i>Snrpf</i>    | - | + |
| <i>Snrpg</i>    | - | + |
| <i>Snupn</i>    | - | + |
| <i>Snx1</i>     | - | + |
| <i>Snx11</i>    | - | + |
| <i>Snx13</i>    | - | + |
| <i>Snx14</i>    | - | + |
| <i>Snx15</i>    | - | + |
| <i>Snx17</i>    | - | + |
| <i>Snx18</i>    | - | + |
| <i>Snx19</i>    | - | + |
| <i>Snx2</i>     | - | + |
| <i>Snx20</i>    | - | + |
| <i>Snx29</i>    | - | + |
| <i>Snx3</i>     | - | + |
| <i>Snx30</i>    | - | + |
| <i>Snx32</i>    | - | + |
| <i>Snx4</i>     | - | + |
| <i>Snx5</i>     | - | + |
| <i>Snx6</i>     | - | + |
| <i>Snx8</i>     | - | + |
| <i>Snx9</i>     | - | + |
| <i>Soat1</i>    | - | + |
| <i>Socs1</i>    | - | + |
| <i>Socs4</i>    | - | + |
| <i>Socs7</i>    | - | + |
| <i>Sod1</i>     | - | + |
| <i>Sod2</i>     | - | + |
| <i>Son</i>      | - | + |
| <i>Sorbs1</i>   | - | + |
| <i>Sorl1</i>    | - | + |
| <i>Sos1</i>     | - | + |
| <i>Sos2</i>     | - | + |
| <i>Sp1</i>      | - | + |

|                 |   |   |
|-----------------|---|---|
| <i>Sp110</i>    | - | + |
| <i>Sp140</i>    | - | + |
| <i>Sp2</i>      | - | + |
| <i>Sp3</i>      | - | + |
| <i>Sp4</i>      | - | + |
| <i>Spag1</i>    | - | + |
| <i>Spag5</i>    | - | + |
| <i>Spag7</i>    | - | + |
| <i>Spast</i>    | - | + |
| <i>Spata1</i>   | - | + |
| <i>Spata2</i>   | - | + |
| <i>Spata24</i>  | - | + |
| <i>Spata2l</i>  | - | + |
| <i>Spata5</i>   | - | + |
| <i>Spata6</i>   | - | + |
| <i>Spc24</i>    | - | + |
| <i>Spc25</i>    | - | + |
| <i>Spcs1</i>    | - | + |
| <i>Spcs3</i>    | - | + |
| <i>Specc1l</i>  | - | + |
| <i>Spen</i>     | - | + |
| <i>Spg20</i>    | - | + |
| <i>Spg21</i>    | - | + |
| <i>Spg7</i>     | - | + |
| <i>Sphk2</i>    | - | + |
| <i>Spib</i>     | - | + |
| <i>Spin1</i>    | - | + |
| <i>Spink10</i>  | - | + |
| <i>Spn</i>      | - | + |
| <i>Spns1</i>    | - | + |
| <i>Spopl</i>    | - | + |
| <i>Sppl2b</i>   | - | + |
| <i>Sppl3</i>    | - | + |
| <i>Spr</i>      | - | + |
| <i>Sprtn</i>    | - | + |
| <i>Spsb2</i>    | - | + |
| <i>Spsb3</i>    | - | + |
| <i>Sptan1</i>   | - | + |
| <i>Sptbn1</i>   | - | + |
| <i>Sptlc1</i>   | - | + |
| <i>Sptssa</i>   | - | + |
| <i>Sqle</i>     | - | + |
| <i>Sqstm1</i>   | - | + |
| <i>Sra1</i>     | - | + |
| <i>Srbd1</i>    | - | + |
| <i>Srd5a3</i>   | - | + |
| <i>Srebf1</i>   | - | + |
| <i>Srebf2</i>   | - | + |
| <i>Srek1ip1</i> | - | + |
| <i>Srf</i>      | - | + |
| <i>Srfbp1</i>   | - | + |
| <i>Srgap2</i>   | - | + |
| <i>Srgn</i>     | - | + |

|                   |   |   |
|-------------------|---|---|
| <i>Sri</i>        | - | + |
| <i>Srm</i>        | - | + |
| <i>Srp14</i>      | - | + |
| <i>Srp19</i>      | - | + |
| <i>Srp54a</i>     | - | + |
| <i>Srp68</i>      | - | + |
| <i>Srp72</i>      | - | + |
| <i>Srp9</i>       | - | + |
| <i>Srpk2</i>      | - | + |
| <i>Srpr</i>       | - | + |
| <i>Srprb</i>      | - | + |
| <i>Srr</i>        | - | + |
| <i>Srrd</i>       | - | + |
| <i>Srrm2</i>      | - | + |
| <i>Srt</i>        | - | + |
| <i>Srsf1</i>      | - | + |
| <i>Srsf11</i>     | - | + |
| <i>Srsf2</i>      | - | + |
| <i>Srsf3</i>      | - | + |
| <i>Srsf4</i>      | - | + |
| <i>Srsf5</i>      | - | + |
| <i>Srsf7</i>      | - | + |
| <i>Srsf9</i>      | - | + |
| <i>Ss18</i>       | - | + |
| <i>Ss18l1</i>     | - | + |
| <i>Ssbp3</i>      | - | + |
| <i>Ssbp4</i>      | - | + |
| <i>Ssfa2</i>      | - | + |
| <i>Ssh2</i>       | - | + |
| <i>Ssh3</i>       | - | + |
| <i>Ssna1</i>      | - | + |
| <i>Ssr1</i>       | - | + |
| <i>Ssr4</i>       | - | + |
| <i>Ssu72</i>      | - | + |
| <i>St13</i>       | - | + |
| <i>St3gal1</i>    | - | + |
| <i>St3gal2</i>    | - | + |
| <i>St3gal3</i>    | - | + |
| <i>St3gal5</i>    | - | + |
| <i>St6gal1</i>    | - | + |
| <i>St6galnac6</i> | - | + |
| <i>St7</i>        | - | + |
| <i>St7l</i>       | - | + |
| <i>St8sia4</i>    | - | + |
| <i>Stag1</i>      | - | + |
| <i>Stag2</i>      | - | + |
| <i>Stam2</i>      | - | + |
| <i>Stap1</i>      | - | + |
| <i>Stard3nl</i>   | - | + |
| <i>Stard4</i>     | - | + |
| <i>Stard5</i>     | - | + |
| <i>Stard6</i>     | - | + |
| <i>Stard7</i>     | - | + |

|               |   |   |
|---------------|---|---|
| <i>Stat1</i>  | - | + |
| <i>Stat2</i>  | - | + |
| <i>Stat3</i>  | - | + |
| <i>Stat4</i>  | - | + |
| <i>Stil</i>   | - | + |
| <i>Stim1</i>  | - | + |
| <i>Stim2</i>  | - | + |
| <i>Stip1</i>  | - | + |
| <i>Stk10</i>  | - | + |
| <i>Stk11</i>  | - | + |
| <i>Stk17b</i> | - | + |
| <i>Stk19</i>  | - | + |
| <i>Stk25</i>  | - | + |
| <i>Stk3</i>   | - | + |
| <i>Stk35</i>  | - | + |
| <i>Stk36</i>  | - | + |
| <i>Stk38</i>  | - | + |
| <i>Stk38l</i> | - | + |
| <i>Stk4</i>   | - | + |
| <i>Stk40</i>  | - | + |
| <i>Stoml2</i> | - | + |
| <i>Stpg1</i>  | - | + |
| <i>Stra13</i> | - | + |
| <i>Strada</i> | - | + |
| <i>Stradb</i> | - | + |
| <i>Strn</i>   | - | + |
| <i>Strn3</i>  | - | + |
| <i>Strn4</i>  | - | + |
| <i>Stt3a</i>  | - | + |
| <i>Stt3b</i>  | - | + |
| <i>Stub1</i>  | - | + |
| <i>Stx11</i>  | - | + |
| <i>Stx12</i>  | - | + |
| <i>Stx2</i>   | - | + |
| <i>Stx4a</i>  | - | + |
| <i>Stx5a</i>  | - | + |
| <i>Stx7</i>   | - | + |
| <i>Stx8</i>   | - | + |
| <i>Stxbp2</i> | - | + |
| <i>Stxbp4</i> | - | + |
| <i>Stxbp5</i> | - | + |
| <i>Styx</i>   | - | + |
| <i>Sucla2</i> | - | + |
| <i>Suclg1</i> | - | + |
| <i>Suclg2</i> | - | + |
| <i>Suds3</i>  | - | + |
| <i>Sufu</i>   | - | + |
| <i>Sugp1</i>  | - | + |
| <i>Sugp2</i>  | - | + |
| <i>Sugt1</i>  | - | + |
| <i>Sumf1</i>  | - | + |
| <i>Sumf2</i>  | - | + |
| <i>Sumo1</i>  | - | + |



|                 |   |   |
|-----------------|---|---|
| <i>Sumo2</i>    | - | + |
| <i>Sumo3</i>    | - | + |
| <i>Sun1</i>     | - | + |
| <i>Sun2</i>     | - | + |
| <i>Suox</i>     | - | + |
| <i>Supt16</i>   | - | + |
| <i>Supt20</i>   | - | + |
| <i>Supt4a</i>   | - | + |
| <i>Supt6</i>    | - | + |
| <i>Supt7l</i>   | - | + |
| <i>Supv3l1</i>  | - | + |
| <i>Surf1</i>    | - | + |
| <i>Surf2</i>    | - | + |
| <i>Surf4</i>    | - | + |
| <i>Surf6</i>    | - | + |
| <i>Susd3</i>    | - | + |
| <i>Suv39h1</i>  | - | + |
| <i>Suv39h2</i>  | - | + |
| <i>Suv420h2</i> | - | + |
| <i>Suz12</i>    | - | + |
| <i>Swap70</i>   | - | + |
| <i>Swi5</i>     | - | + |
| <i>Swt1</i>     | - | + |
| <i>Syap1</i>    | - | + |
| <i>Syce2</i>    | - | + |
| <i>Syf2</i>     | - | + |
| <i>Syk</i>      | - | + |
| <i>Syn3</i>     | - | + |
| <i>Syne3</i>    | - | + |
| <i>Syngr2</i>   | - | + |
| <i>Syngr4</i>   | - | + |
| <i>Synj2</i>    | - | + |
| <i>Synrg</i>    | - | + |
| <i>Sypl</i>     | - | + |
| <i>Sys1</i>     | - | + |
| <i>Syvn1</i>    | - | + |
| <i>Szrd1</i>    | - | + |
| <i>Szt2</i>     | - | + |
| <i>Tab1</i>     | - | + |
| <i>Tab2</i>     | - | + |
| <i>Tacc3</i>    | - | + |
| <i>Taco1</i>    | - | + |
| <i>Tada1</i>    | - | + |
| <i>Tada3</i>    | - | + |
| <i>Taf1</i>     | - | + |
| <i>Taf10</i>    | - | + |
| <i>Taf11</i>    | - | + |
| <i>Taf12</i>    | - | + |
| <i>Taf1b</i>    | - | + |
| <i>Taf1c</i>    | - | + |
| <i>Taf1d</i>    | - | + |
| <i>Taf2</i>     | - | + |
| <i>Taf4a</i>    | - | + |

|                 |   |   |
|-----------------|---|---|
| <i>Taf5</i>     | - | + |
| <i>Taf5l</i>    | - | + |
| <i>Taf6</i>     | - | + |
| <i>Taf6l</i>    | - | + |
| <i>Taf8</i>     | - | + |
| <i>Taf9</i>     | - | + |
| <i>Taf9b</i>    | - | + |
| <i>Tagap</i>    | - | + |
| <i>Tagln2</i>   | - | + |
| <i>Tango6</i>   | - | + |
| <i>Tank</i>     | - | + |
| <i>Taok2</i>    | - | + |
| <i>Taok3</i>    | - | + |
| <i>Tap1</i>     | - | + |
| <i>Tap2</i>     | - | + |
| <i>Tapbpl</i>   | - | + |
| <i>Tapt1</i>    | - | + |
| <i>Tarbp2</i>   | - | + |
| <i>Tardbp</i>   | - | + |
| <i>Tars2</i>    | - | + |
| <i>Tas1r1</i>   | - | + |
| <i>Tatdn1</i>   | - | + |
| <i>Tatdn2</i>   | - | + |
| <i>Tax1bp1</i>  | - | + |
| <i>Taz</i>      | - | + |
| <i>Tbc1d1</i>   | - | + |
| <i>Tbc1d10a</i> | - | + |
| <i>Tbc1d10b</i> | - | + |
| <i>Tbc1d10c</i> | - | + |
| <i>Tbc1d13</i>  | - | + |
| <i>Tbc1d15</i>  | - | + |
| <i>Tbc1d17</i>  | - | + |
| <i>Tbc1d20</i>  | - | + |
| <i>Tbc1d22a</i> | - | + |
| <i>Tbc1d25</i>  | - | + |
| <i>Tbc1d5</i>   | - | + |
| <i>Tbc1d7</i>   | - | + |
| <i>Tbc1d8b</i>  | - | + |
| <i>Tbcb</i>     | - | + |
| <i>Tbcc</i>     | - | + |
| <i>Tbccd1</i>   | - | + |
| <i>Tbce</i>     | - | + |
| <i>Tbck</i>     | - | + |
| <i>Tbk1</i>     | - | + |
| <i>Tbl1x</i>    | - | + |
| <i>Tbl1xr1</i>  | - | + |
| <i>Tbl3</i>     | - | + |
| <i>Tbp</i>      | - | + |
| <i>Tbpl1</i>    | - | + |
| <i>Tbrg3</i>    | - | + |
| <i>Tbrg4</i>    | - | + |
| <i>Tcea1</i>    | - | + |
| <i>Tceanc</i>   | - | + |

|                |   |   |
|----------------|---|---|
| <i>Tceanc2</i> | - | + |
| <i>Tceb1</i>   | - | + |
| <i>Tceb2</i>   | - | + |
| <i>Tcerg1</i>  | - | + |
| <i>Tcf19</i>   | - | + |
| <i>Tcf25</i>   | - | + |
| <i>Tcf3</i>    | - | + |
| <i>Tcf4</i>    | - | + |
| <i>Tchp</i>    | - | + |
| <i>Tcirg1</i>  | - | + |
| <i>Tcof1</i>   | - | + |
| <i>Tcp1</i>    | - | + |
| <i>Tcta</i>    | - | + |
| <i>Tctn1</i>   | - | + |
| <i>Tdg</i>     | - | + |
| <i>Tdp1</i>    | - | + |
| <i>Tdp2</i>    | - | + |
| <i>Tdrd3</i>   | - | + |
| <i>Tec</i>     | - | + |
| <i>Tecpr1</i>  | - | + |
| <i>Tecpr2</i>  | - | + |
| <i>Tecr</i>    | - | + |
| <i>Tefm</i>    | - | + |
| <i>Ten1</i>    | - | + |
| <i>Tep1</i>    | - | + |
| <i>Terf1</i>   | - | + |
| <i>Terf2</i>   | - | + |
| <i>Terf2ip</i> | - | + |
| <i>Tert</i>    | - | + |
| <i>Tes</i>     | - | + |
| <i>Tesk1</i>   | - | + |
| <i>Tesk2</i>   | - | + |
| <i>Tespa1</i>  | - | + |
| <i>Tet2</i>    | - | + |
| <i>Tex10</i>   | - | + |
| <i>Tex14</i>   | - | + |
| <i>Tex22</i>   | - | + |
| <i>Tex261</i>  | - | + |
| <i>Tex264</i>  | - | + |
| <i>Tex30</i>   | - | + |
| <i>Tex9</i>    | - | + |
| <i>Tfam</i>    | - | + |
| <i>Tfb1m</i>   | - | + |
| <i>Tfb2m</i>   | - | + |
| <i>Tfcp2</i>   | - | + |
| <i>Tfdp1</i>   | - | + |
| <i>Tfe3</i>    | - | + |
| <i>Tfeb</i>    | - | + |
| <i>Tfip11</i>  | - | + |
| <i>Tfpt</i>    | - | + |
| <i>Tfrc</i>    | - | + |
| <i>Tgfb1</i>   | - | + |
| <i>Tgfbr1</i>  | - | + |

|                 |   |   |
|-----------------|---|---|
| <i>Tgfbr2</i>   | - | + |
| <i>Tgfbrap1</i> | - | + |
| <i>Tgif1</i>    | - | + |
| <i>Tgif2</i>    | - | + |
| <i>Tgoln1</i>   | - | + |
| <i>Tgoln2</i>   | - | + |
| <i>Tgs1</i>     | - | + |
| <i>Thada</i>    | - | + |
| <i>Thap1</i>    | - | + |
| <i>Thap11</i>   | - | + |
| <i>Thap2</i>    | - | + |
| <i>Thap4</i>    | - | + |
| <i>Thap6</i>    | - | + |
| <i>Thap7</i>    | - | + |
| <i>Them6</i>    | - | + |
| <i>Themis2</i>  | - | + |
| <i>Thoc2</i>    | - | + |
| <i>Thoc3</i>    | - | + |
| <i>Thoc5</i>    | - | + |
| <i>Thoc7</i>    | - | + |
| <i>Thop1</i>    | - | + |
| <i>Thrap3</i>   | - | + |
| <i>Thumpd1</i>  | - | + |
| <i>Thumpd2</i>  | - | + |
| <i>Thumpd3</i>  | - | + |
| <i>Ticam1</i>   | - | + |
| <i>Ticam2</i>   | - | + |
| <i>Ticrr</i>    | - | + |
| <i>Tigd2</i>    | - | + |
| <i>Tigd3</i>    | - | + |
| <i>Tigd5</i>    | - | + |
| <i>Timeless</i> | - | + |
| <i>Timm10b</i>  | - | + |
| <i>Timm13</i>   | - | + |
| <i>Timm17b</i>  | - | + |
| <i>Timm23</i>   | - | + |
| <i>Timm44</i>   | - | + |
| <i>Timm50</i>   | - | + |
| <i>Timm8a1</i>  | - | + |
| <i>Timm8b</i>   | - | + |
| <i>Timm9</i>    | - | + |
| <i>Timmdc1</i>  | - | + |
| <i>Tinf2</i>    | - | + |
| <i>Tipin</i>    | - | + |
| <i>Tiprl</i>    | - | + |
| <i>Tirap</i>    | - | + |
| <i>Tk1</i>      | - | + |
| <i>Tk2</i>      | - | + |
| <i>Tkt</i>      | - | + |
| <i>Tlcd1</i>    | - | + |
| <i>Tlcd2</i>    | - | + |
| <i>Tlk1</i>     | - | + |
| <i>Tlk2</i>     | - | + |

|                 |   |   |
|-----------------|---|---|
| <i>Tln1</i>     | - | + |
| <i>Tlr1</i>     | - | + |
| <i>Tlr3</i>     | - | + |
| <i>Tlr4</i>     | - | + |
| <i>Tlr6</i>     | - | + |
| <i>Tlr9</i>     | - | + |
| <i>Tm2d2</i>    | - | + |
| <i>Tm2d3</i>    | - | + |
| <i>Tm7sf2</i>   | - | + |
| <i>Tm7sf3</i>   | - | + |
| <i>Tm9sf1</i>   | - | + |
| <i>Tm9sf2</i>   | - | + |
| <i>Tm9sf3</i>   | - | + |
| <i>Tma7</i>     | - | + |
| <i>Tmbim1</i>   | - | + |
| <i>Tmbim6</i>   | - | + |
| <i>Tmc6</i>     | - | + |
| <i>Tmc8</i>     | - | + |
| <i>Tmcc1</i>    | - | + |
| <i>Tmco1</i>    | - | + |
| <i>Tmco3</i>    | - | + |
| <i>Tmco4</i>    | - | + |
| <i>Tmed1</i>    | - | + |
| <i>Tmed10</i>   | - | + |
| <i>Tmed5</i>    | - | + |
| <i>Tmed7</i>    | - | + |
| <i>Tmed8</i>    | - | + |
| <i>Tmem101</i>  | - | + |
| <i>Tmem104</i>  | - | + |
| <i>Tmem106a</i> | - | + |
| <i>Tmem106b</i> | - | + |
| <i>Tmem106c</i> | - | + |
| <i>Tmem107</i>  | - | + |
| <i>Tmem11</i>   | - | + |
| <i>Tmem110</i>  | - | + |
| <i>Tmem120a</i> | - | + |
| <i>Tmem120b</i> | - | + |
| <i>Tmem123</i>  | - | + |
| <i>Tmem127</i>  | - | + |
| <i>Tmem128</i>  | - | + |
| <i>Tmem129</i>  | - | + |
| <i>Tmem131</i>  | - | + |
| <i>Tmem134</i>  | - | + |
| <i>Tmem135</i>  | - | + |
| <i>Tmem138</i>  | - | + |
| <i>Tmem140</i>  | - | + |
| <i>Tmem143</i>  | - | + |
| <i>Tmem144</i>  | - | + |
| <i>Tmem147</i>  | - | + |
| <i>Tmem14a</i>  | - | + |
| <i>Tmem14c</i>  | - | + |
| <i>Tmem150a</i> | - | + |
| <i>Tmem159</i>  | - | + |

|                 |   |   |
|-----------------|---|---|
| <i>Tmem160</i>  | - | + |
| <i>Tmem161a</i> | - | + |
| <i>Tmem164</i>  | - | + |
| <i>Tmem167</i>  | - | + |
| <i>Tmem168</i>  | - | + |
| <i>Tmem17</i>   | - | + |
| <i>Tmem170</i>  | - | + |
| <i>Tmem170b</i> | - | + |
| <i>Tmem173</i>  | - | + |
| <i>Tmem175</i>  | - | + |
| <i>Tmem177</i>  | - | + |
| <i>Tmem179b</i> | - | + |
| <i>Tmem18</i>   | - | + |
| <i>Tmem183a</i> | - | + |
| <i>Tmem184b</i> | - | + |
| <i>Tmem185b</i> | - | + |
| <i>Tmem186</i>  | - | + |
| <i>Tmem19</i>   | - | + |
| <i>Tmem194</i>  | - | + |
| <i>Tmem194b</i> | - | + |
| <i>Tmem199</i>  | - | + |
| <i>Tmem201</i>  | - | + |
| <i>Tmem203</i>  | - | + |
| <i>Tmem206</i>  | - | + |
| <i>Tmem208</i>  | - | + |
| <i>Tmem214</i>  | - | + |
| <i>Tmem216</i>  | - | + |
| <i>Tmem218</i>  | - | + |
| <i>Tmem219</i>  | - | + |
| <i>Tmem223</i>  | - | + |
| <i>Tmem230</i>  | - | + |
| <i>Tmem231</i>  | - | + |
| <i>Tmem234</i>  | - | + |
| <i>Tmem237</i>  | - | + |
| <i>Tmem238</i>  | - | + |
| <i>Tmem240</i>  | - | + |
| <i>Tmem241</i>  | - | + |
| <i>Tmem242</i>  | - | + |
| <i>Tmem243</i>  | - | + |
| <i>Tmem245</i>  | - | + |
| <i>Tmem248</i>  | - | + |
| <i>Tmem251</i>  | - | + |
| <i>Tmem258</i>  | - | + |
| <i>Tmem26</i>   | - | + |
| <i>Tmem29</i>   | - | + |
| <i>Tmem30a</i>  | - | + |
| <i>Tmem39b</i>  | - | + |
| <i>Tmem42</i>   | - | + |
| <i>Tmem43</i>   | - | + |
| <i>Tmem48</i>   | - | + |
| <i>Tmem5</i>    | - | + |
| <i>Tmem50a</i>  | - | + |
| <i>Tmem55a</i>  | - | + |

|                  |   |   |
|------------------|---|---|
| <i>Tmem55b</i>   | - | + |
| <i>Tmem59</i>    | - | + |
| <i>Tmem60</i>    | - | + |
| <i>Tmem62</i>    | - | + |
| <i>Tmem63a</i>   | - | + |
| <i>Tmem67</i>    | - | + |
| <i>Tmem68</i>    | - | + |
| <i>Tmem69</i>    | - | + |
| <i>Tmem70</i>    | - | + |
| <i>Tmem71</i>    | - | + |
| <i>Tmem79</i>    | - | + |
| <i>Tmem80</i>    | - | + |
| <i>Tmem82</i>    | - | + |
| <i>Tmem87a</i>   | - | + |
| <i>Tmem88</i>    | - | + |
| <i>Tmem97</i>    | - | + |
| <i>Tmem9b</i>    | - | + |
| <i>Tmf1</i>      | - | + |
| <i>Tmpo</i>      | - | + |
| <i>Tmppe</i>     | - | + |
| <i>Tmsb10</i>    | - | + |
| <i>Tmsb15b1</i>  | - | + |
| <i>Tmsb15l</i>   | - | + |
| <i>Tmsb4x</i>    | - | + |
| <i>Tmtc2</i>     | - | + |
| <i>Tmtc3</i>     | - | + |
| <i>Tmtc4</i>     | - | + |
| <i>Tmub1</i>     | - | + |
| <i>Tmub2</i>     | - | + |
| <i>Tmx2</i>      | - | + |
| <i>Tmx3</i>      | - | + |
| <i>Tnf</i>       | - | + |
| <i>Tnfaip1</i>   | - | + |
| <i>Tnfaip3</i>   | - | + |
| <i>Tnfaip8</i>   | - | + |
| <i>Tnfrsf13b</i> | - | + |
| <i>Tnfrsf13c</i> | - | + |
| <i>Tnfrsf14</i>  | - | + |
| <i>Tnfrsf1b</i>  | - | + |
| <i>Tnfrsf22</i>  | - | + |
| <i>Tnfrsf26</i>  | - | + |
| <i>Tnfsf10</i>   | - | + |
| <i>Tnfsf9</i>    | - | + |
| <i>Tnip2</i>     | - | + |
| <i>Tnk2</i>      | - | + |
| <i>Tnks2</i>     | - | + |
| <i>Tnpo1</i>     | - | + |
| <i>Tnpo2</i>     | - | + |
| <i>Tnrc6a</i>    | - | + |
| <i>Tnrc6b</i>    | - | + |
| <i>Tob2</i>      | - | + |
| <i>Toe1</i>      | - | + |
| <i>Tom1</i>      | - | + |

|                 |   |   |
|-----------------|---|---|
| <i>Tom1l2</i>   | - | + |
| <i>Tomm20</i>   | - | + |
| <i>Tomm22</i>   | - | + |
| <i>Tomm34</i>   | - | + |
| <i>Tomm40</i>   | - | + |
| <i>Tomm40l</i>  | - | + |
| <i>Tomm7</i>    | - | + |
| <i>Tomt</i>     | - | + |
| <i>Tonsl</i>    | - | + |
| <i>Top1</i>     | - | + |
| <i>Top1mt</i>   | - | + |
| <i>Top2a</i>    | - | + |
| <i>Top2b</i>    | - | + |
| <i>Top3a</i>    | - | + |
| <i>Top3b</i>    | - | + |
| <i>Topbp1</i>   | - | + |
| <i>Topors</i>   | - | + |
| <i>Tor1a</i>    | - | + |
| <i>Tor1aip1</i> | - | + |
| <i>Tor1aip2</i> | - | + |
| <i>Tor1b</i>    | - | + |
| <i>Tor2a</i>    | - | + |
| <i>Tor3a</i>    | - | + |
| <i>Tor4a</i>    | - | + |
| <i>Tox</i>      | - | + |
| <i>Tox4</i>     | - | + |
| <i>Tpcn2</i>    | - | + |
| <i>Tpd52</i>    | - | + |
| <i>Tpd52l2</i>  | - | + |
| <i>Tpgs1</i>    | - | + |
| <i>Tpgs2</i>    | - | + |
| <i>Tpi1</i>     | - | + |
| <i>Tpk1</i>     | - | + |
| <i>Tpm4</i>     | - | + |
| <i>Tpp1</i>     | - | + |
| <i>Tpp2</i>     | - | + |
| <i>Tpr</i>      | - | + |
| <i>Tpra1</i>    | - | + |
| <i>Tprgl</i>    | - | + |
| <i>Tprkb</i>    | - | + |
| <i>Tprn</i>     | - | + |
| <i>Tpst2</i>    | - | + |
| <i>Tpt1</i>     | - | + |
| <i>Tpx2</i>     | - | + |
| <i>Tra2a</i>    | - | + |
| <i>Tra2b</i>    | - | + |
| <i>Trabd</i>    | - | + |
| <i>Trabd2b</i>  | - | + |
| <i>Traf1</i>    | - | + |
| <i>Traf2</i>    | - | + |
| <i>Traf3</i>    | - | + |
| <i>Traf3ip2</i> | - | + |
| <i>Traf3ip3</i> | - | + |



|                 |   |   |
|-----------------|---|---|
| <i>Traf4</i>    | - | + |
| <i>Traf5</i>    | - | + |
| <i>Traf7</i>    | - | + |
| <i>Traip</i>    | - | + |
| <i>Trak2</i>    | - | + |
| <i>Tram1</i>    | - | + |
| <i>Trap1</i>    | - | + |
| <i>Trappc10</i> | - | + |
| <i>Trappc11</i> | - | + |
| <i>Trappc12</i> | - | + |
| <i>Trappc13</i> | - | + |
| <i>Trappc2</i>  | - | + |
| <i>Trappc2l</i> | - | + |
| <i>Trappc3</i>  | - | + |
| <i>Trappc4</i>  | - | + |
| <i>Trappc6a</i> | - | + |
| <i>Trappc6b</i> | - | + |
| <i>Trappc8</i>  | - | + |
| <i>Trdmt1</i>   | - | + |
| <i>Trem12</i>   | - | + |
| <i>Trex1</i>    | - | + |
| <i>Triap1</i>   | - | + |
| <i>Trib2</i>    | - | + |
| <i>Trib3</i>    | - | + |
| <i>Trim11</i>   | - | + |
| <i>Trim12a</i>  | - | + |
| <i>Trim12c</i>  | - | + |
| <i>Trim13</i>   | - | + |
| <i>Trim14</i>   | - | + |
| <i>Trim21</i>   | - | + |
| <i>Trim23</i>   | - | + |
| <i>Trim24</i>   | - | + |
| <i>Trim25</i>   | - | + |
| <i>Trim30d</i>  | - | + |
| <i>Trim32</i>   | - | + |
| <i>Trim33</i>   | - | + |
| <i>Trim34a</i>  | - | + |
| <i>Trim35</i>   | - | + |
| <i>Trim37</i>   | - | + |
| <i>Trim39</i>   | - | + |
| <i>Trim41</i>   | - | + |
| <i>Trim44</i>   | - | + |
| <i>Trim46</i>   | - | + |
| <i>Trim56</i>   | - | + |
| <i>Trim65</i>   | - | + |
| <i>Trim68</i>   | - | + |
| <i>Trim8</i>    | - | + |
| <i>Trip11</i>   | - | + |
| <i>Trip12</i>   | - | + |
| <i>Trip13</i>   | - | + |
| <i>Trip4</i>    | - | + |
| <i>Trit1</i>    | - | + |
| <i>Trmt1</i>    | - | + |

|                  |   |   |
|------------------|---|---|
| <i>Trmt10a</i>   | - | + |
| <i>Trmt10b</i>   | - | + |
| <i>Trmt10c</i>   | - | + |
| <i>Trmt11</i>    | - | + |
| <i>Trmt112</i>   | - | + |
| <i>Trmt12</i>    | - | + |
| <i>Trmt1l</i>    | - | + |
| <i>Trmt2a</i>    | - | + |
| <i>Trmt2b</i>    | - | + |
| <i>Trmt5</i>     | - | + |
| <i>Trmt6</i>     | - | + |
| <i>Trmu</i>      | - | + |
| <i>Trnau1ap</i>  | - | + |
| <i>Trp53</i>     | - | + |
| <i>Trp53i11</i>  | - | + |
| <i>Trp53inp1</i> | - | + |
| <i>Trpc2</i>     | - | + |
| <i>Trpc4ap</i>   | - | + |
| <i>Trpm7</i>     | - | + |
| <i>Trpv2</i>     | - | + |
| <i>Trub1</i>     | - | + |
| <i>Trub2</i>     | - | + |
| <i>Tsacc</i>     | - | + |
| <i>Tsc2</i>      | - | + |
| <i>Tsc22d2</i>   | - | + |
| <i>Tsen2</i>     | - | + |
| <i>Tsen34</i>    | - | + |
| <i>Tsen54</i>    | - | + |
| <i>Tsfm</i>      | - | + |
| <i>Tsg101</i>    | - | + |
| <i>Tshz1</i>     | - | + |
| <i>Tsn</i>       | - | + |
| <i>Tsnax</i>     | - | + |
| <i>Tspan13</i>   | - | + |
| <i>Tspan14</i>   | - | + |
| <i>Tspan32</i>   | - | + |
| <i>Tspo</i>      | - | + |
| <i>Tspyl3</i>    | - | + |
| <i>Tspyl4</i>    | - | + |
| <i>Tsr1</i>      | - | + |
| <i>Tsr2</i>      | - | + |
| <i>Tsr3</i>      | - | + |
| <i>Tssc1</i>     | - | + |
| <i>Tssc4</i>     | - | + |
| <i>Tssk6</i>     | - | + |
| <i>Tst</i>       | - | + |
| <i>Tstd2</i>     | - | + |
| <i>Tstd3</i>     | - | + |
| <i>Ttc13</i>     | - | + |
| <i>Ttc16</i>     | - | + |
| <i>Ttc17</i>     | - | + |
| <i>Ttc19</i>     | - | + |
| <i>Ttc21a</i>    | - | + |

|                |   |   |
|----------------|---|---|
| <i>Ttc21b</i>  | - | + |
| <i>Ttc26</i>   | - | + |
| <i>Ttc28</i>   | - | + |
| <i>Ttc3</i>    | - | + |
| <i>Ttc30a1</i> | - | + |
| <i>Ttc32</i>   | - | + |
| <i>Ttc33</i>   | - | + |
| <i>Ttc37</i>   | - | + |
| <i>Ttc4</i>    | - | + |
| <i>Ttc7</i>    | - | + |
| <i>Ttc9c</i>   | - | + |
| <i>Ttf2</i>    | - | + |
| <i>Ttk</i>     | - | + |
| <i>Ttll11</i>  | - | + |
| <i>Ttll12</i>  | - | + |
| <i>Ttll13</i>  | - | + |
| <i>Ttll4</i>   | - | + |
| <i>Ttll5</i>   | - | + |
| <i>Ttpal</i>   | - | + |
| <i>Ttyh3</i>   | - | + |
| <i>Tuba1a</i>  | - | + |
| <i>Tuba1b</i>  | - | + |
| <i>Tuba1c</i>  | - | + |
| <i>Tubb2a</i>  | - | + |
| <i>Tubb4b</i>  | - | + |
| <i>Tubb5</i>   | - | + |
| <i>Tubd1</i>   | - | + |
| <i>Tube1</i>   | - | + |
| <i>Tubg1</i>   | - | + |
| <i>Tubgcp2</i> | - | + |
| <i>Tubgcp3</i> | - | + |
| <i>Tubgcp4</i> | - | + |
| <i>Tubgcp5</i> | - | + |
| <i>Tubgcp6</i> | - | + |
| <i>Tufm</i>    | - | + |
| <i>Tug1</i>    | - | + |
| <i>Tulp3</i>   | - | + |
| <i>Tusc2</i>   | - | + |
| <i>Tusc3</i>   | - | + |
| <i>Tut1</i>    | - | + |
| <i>Tvp23b</i>  | - | + |
| <i>Twf2</i>    | - | + |
| <i>Twsg1</i>   | - | + |
| <i>Txlna</i>   | - | + |
| <i>Txlng</i>   | - | + |
| <i>Txn1</i>    | - | + |
| <i>Txn2</i>    | - | + |
| <i>Txndc11</i> | - | + |
| <i>Txndc12</i> | - | + |
| <i>Txndc15</i> | - | + |
| <i>Txndc16</i> | - | + |
| <i>Txndc17</i> | - | + |
| <i>Txndc5</i>  | - | + |

|                |   |   |
|----------------|---|---|
| <i>Txndc9</i>  | - | + |
| <i>Txnip</i>   | - | + |
| <i>Txnl1</i>   | - | + |
| <i>Txnl4a</i>  | - | + |
| <i>Txnl4b</i>  | - | + |
| <i>Txnrd1</i>  | - | + |
| <i>Txnrd2</i>  | - | + |
| <i>Txnrd3</i>  | - | + |
| <i>Tyk2</i>    | - | + |
| <i>Tyms</i>    | - | + |
| <i>Tysnd1</i>  | - | + |
| <i>Tyw1</i>    | - | + |
| <i>Tyw3</i>    | - | + |
| <i>Tyw5</i>    | - | + |
| <i>U05342</i>  | - | + |
| <i>U2af1</i>   | - | + |
| <i>U2af1l4</i> | - | + |
| <i>U2surp</i>  | - | + |
| <i>Uap1</i>    | - | + |
| <i>Uap1l1</i>  | - | + |
| <i>Uba1</i>    | - | + |
| <i>Uba2</i>    | - | + |
| <i>Uba3</i>    | - | + |
| <i>Uba5</i>    | - | + |
| <i>Uba52</i>   | - | + |
| <i>Uba7</i>    | - | + |
| <i>Ubac1</i>   | - | + |
| <i>Ubac2</i>   | - | + |
| <i>Ubald1</i>  | - | + |
| <i>Ubald2</i>  | - | + |
| <i>Ubap1</i>   | - | + |
| <i>Ubap2</i>   | - | + |
| <i>Ubap2l</i>  | - | + |
| <i>Ubb</i>     | - | + |
| <i>Ubc</i>     | - | + |
| <i>Ube2a</i>   | - | + |
| <i>Ube2b</i>   | - | + |
| <i>Ube2c</i>   | - | + |
| <i>Ube2d3</i>  | - | + |
| <i>Ube2e1</i>  | - | + |
| <i>Ube2f</i>   | - | + |
| <i>Ube2g1</i>  | - | + |
| <i>Ube2g2</i>  | - | + |
| <i>Ube2h</i>   | - | + |
| <i>Ube2j1</i>  | - | + |
| <i>Ube2k</i>   | - | + |
| <i>Ube2l6</i>  | - | + |
| <i>Ube2n</i>   | - | + |
| <i>Ube2o</i>   | - | + |
| <i>Ube2q1</i>  | - | + |
| <i>Ube2q2</i>  | - | + |
| <i>Ube2s</i>   | - | + |
| <i>Ube2v1</i>  | - | + |

|                  |   |   |
|------------------|---|---|
| <i>Ube2v2</i>    | - | + |
| <i>Ube2z</i>     | - | + |
| <i>Ube3a</i>     | - | + |
| <i>Ube3b</i>     | - | + |
| <i>Ube4b</i>     | - | + |
| <i>Ubfd1</i>     | - | + |
| <i>Ubiad1</i>    | - | + |
| <i>Ubl3</i>      | - | + |
| <i>Ubl4</i>      | - | + |
| <i>Ubl5</i>      | - | + |
| <i>Ubl7</i>      | - | + |
| <i>Ublcp1</i>    | - | + |
| <i>Ubn1</i>      | - | + |
| <i>Ubp1</i>      | - | + |
| <i>Ubqln2</i>    | - | + |
| <i>Ubqln4</i>    | - | + |
| <i>Ubr1</i>      | - | + |
| <i>Ubr4</i>      | - | + |
| <i>Ubr5</i>      | - | + |
| <i>Ubr7</i>      | - | + |
| <i>Ubd1</i>      | - | + |
| <i>Ubxn1</i>     | - | + |
| <i>Ubxn11</i>    | - | + |
| <i>Ubxn2a</i>    | - | + |
| <i>Ubxn2b</i>    | - | + |
| <i>Ubxn4</i>     | - | + |
| <i>Ubxn6</i>     | - | + |
| <i>Ubxn7</i>     | - | + |
| <i>Ubxn8</i>     | - | + |
| <i>Uchl3</i>     | - | + |
| <i>Uck1</i>      | - | + |
| <i>Uck11</i>     | - | + |
| <i>Ucp2</i>      | - | + |
| <i>Ufd11</i>     | - | + |
| <i>Ufm1</i>      | - | + |
| <i>Ufsp2</i>     | - | + |
| <i>Ugcg</i>      | - | + |
| <i>Uggt1</i>     | - | + |
| <i>Ugp2</i>      | - | + |
| <i>Uhrf1</i>     | - | + |
| <i>Uhrf1bp11</i> | - | + |
| <i>Uhrf2</i>     | - | + |
| <i>Uimc1</i>     | - | + |
| <i>Ulk1</i>      | - | + |
| <i>Ulk2</i>      | - | + |
| <i>Ulk3</i>      | - | + |
| <i>Ulk4</i>      | - | + |
| <i>Unc119</i>    | - | + |
| <i>Unc13d</i>    | - | + |
| <i>Unc45a</i>    | - | + |
| <i>Unc50</i>     | - | + |
| <i>Unc93b1</i>   | - | + |
| <i>Ung</i>       | - | + |

|                 |   |   |
|-----------------|---|---|
| <i>Unkl</i>     | - | + |
| <i>Upf1</i>     | - | + |
| <i>Upf2</i>     | - | + |
| <i>Upf3a</i>    | - | + |
| <i>Upf3b</i>    | - | + |
| <i>Uppt</i>     | - | + |
| <i>Uqcr10</i>   | - | + |
| <i>Uqcr11</i>   | - | + |
| <i>Uqcrb</i>    | - | + |
| <i>Uqcrc1</i>   | - | + |
| <i>Uqcrcfs1</i> | - | + |
| <i>Uqcrh</i>    | - | + |
| <i>Uqcrg</i>    | - | + |
| <i>Urb1</i>     | - | + |
| <i>Urb2</i>     | - | + |
| <i>Urgcp</i>    | - | + |
| <i>Uri1</i>     | - | + |
| <i>Urm1</i>     | - | + |
| <i>Urod</i>     | - | + |
| <i>Uros</i>     | - | + |
| <i>Usb1</i>     | - | + |
| <i>Use1</i>     | - | + |
| <i>Usf1</i>     | - | + |
| <i>Usf2</i>     | - | + |
| <i>Ushbp1</i>   | - | + |
| <i>Usmg5</i>    | - | + |
| <i>Uso1</i>     | - | + |
| <i>Usp10</i>    | - | + |
| <i>Usp11</i>    | - | + |
| <i>Usp12</i>    | - | + |
| <i>Usp14</i>    | - | + |
| <i>Usp19</i>    | - | + |
| <i>Usp20</i>    | - | + |
| <i>Usp21</i>    | - | + |
| <i>Usp24</i>    | - | + |
| <i>Usp28</i>    | - | + |
| <i>Usp3</i>     | - | + |
| <i>Usp30</i>    | - | + |
| <i>Usp32</i>    | - | + |
| <i>Usp33</i>    | - | + |
| <i>Usp34</i>    | - | + |
| <i>Usp38</i>    | - | + |
| <i>Usp39</i>    | - | + |
| <i>Usp4</i>     | - | + |
| <i>Usp42</i>    | - | + |
| <i>Usp45</i>    | - | + |
| <i>Usp46</i>    | - | + |
| <i>Usp48</i>    | - | + |
| <i>Usp49</i>    | - | + |
| <i>Usp5</i>     | - | + |
| <i>Usp6nl</i>   | - | + |
| <i>Usp7</i>     | - | + |
| <i>Usp9x</i>    | - | + |

|                |   |   |
|----------------|---|---|
| <i>Usp11</i>   | - | + |
| <i>Utp111</i>  | - | + |
| <i>Utp14b</i>  | - | + |
| <i>Utp15</i>   | - | + |
| <i>Utp20</i>   | - | + |
| <i>Utp3</i>    | - | + |
| <i>Uvrag</i>   | - | + |
| <i>Uvssa</i>   | - | + |
| <i>Uxt</i>     | - | + |
| <i>Vamp2</i>   | - | + |
| <i>Vamp3</i>   | - | + |
| <i>Vamp5</i>   | - | + |
| <i>Vamp8</i>   | - | + |
| <i>Vapb</i>    | - | + |
| <i>Vars</i>    | - | + |
| <i>Vars2</i>   | - | + |
| <i>Vasp</i>    | - | + |
| <i>Vav1</i>    | - | + |
| <i>Vav2</i>    | - | + |
| <i>Vcp</i>     | - | + |
| <i>Vcpip1</i>  | - | + |
| <i>Vdac2</i>   | - | + |
| <i>Vdac3</i>   | - | + |
| <i>Vegfb</i>   | - | + |
| <i>Vezf1</i>   | - | + |
| <i>Vezt</i>    | - | + |
| <i>Vgl14</i>   | - | + |
| <i>Vhl</i>     | - | + |
| <i>Vimp</i>    | - | + |
| <i>Vipas39</i> | - | + |
| <i>Vma21</i>   | - | + |
| <i>Vmac</i>    | - | + |
| <i>Vmp1</i>    | - | + |
| <i>Vprbp</i>   | - | + |
| <i>Vpreb3</i>  | - | + |
| <i>Vps11</i>   | - | + |
| <i>Vps13b</i>  | - | + |
| <i>Vps13c</i>  | - | + |
| <i>Vps13d</i>  | - | + |
| <i>Vps16</i>   | - | + |
| <i>Vps18</i>   | - | + |
| <i>Vps26a</i>  | - | + |
| <i>Vps28</i>   | - | + |
| <i>Vps29</i>   | - | + |
| <i>Vps33a</i>  | - | + |
| <i>Vps33b</i>  | - | + |
| <i>Vps35</i>   | - | + |
| <i>Vps37a</i>  | - | + |
| <i>Vps39</i>   | - | + |
| <i>Vps45</i>   | - | + |
| <i>Vps4b</i>   | - | + |
| <i>Vps51</i>   | - | + |
| <i>Vps52</i>   | - | + |

|                |   |   |
|----------------|---|---|
| <i>Vps53</i>   | - | + |
| <i>Vps54</i>   | - | + |
| <i>Vps72</i>   | - | + |
| <i>Vps9d1</i>  | - | + |
| <i>Vrk2</i>    | - | + |
| <i>Vrk3</i>    | - | + |
| <i>Vta1</i>    | - | + |
| <i>Vti1a</i>   | - | + |
| <i>Vti1b</i>   | - | + |
| <i>Vwa5a</i>   | - | + |
| <i>Vwa8</i>    | - | + |
| <i>Vwa9</i>    | - | + |
| <i>Wac</i>     | - | + |
| <i>Wapal</i>   | - | + |
| <i>Wars</i>    | - | + |
| <i>Was</i>     | - | + |
| <i>Wasf2</i>   | - | + |
| <i>Wash</i>    | - | + |
| <i>Wbp1</i>    | - | + |
| <i>Wbp11</i>   | - | + |
| <i>Wbp1l</i>   | - | + |
| <i>Wbp2</i>    | - | + |
| <i>Wbp4</i>    | - | + |
| <i>Wbp5</i>    | - | + |
| <i>Wbp7</i>    | - | + |
| <i>Wbscr16</i> | - | + |
| <i>Wbscr22</i> | - | + |
| <i>Wbscr27</i> | - | + |
| <i>Wdfy1</i>   | - | + |
| <i>Wdfy2</i>   | - | + |
| <i>Wdfy4</i>   | - | + |
| <i>Wdhd1</i>   | - | + |
| <i>Wdpcp</i>   | - | + |
| <i>Wdr11</i>   | - | + |
| <i>Wdr13</i>   | - | + |
| <i>Wdr16</i>   | - | + |
| <i>Wdr18</i>   | - | + |
| <i>Wdr25</i>   | - | + |
| <i>Wdr26</i>   | - | + |
| <i>Wdr27</i>   | - | + |
| <i>Wdr3</i>    | - | + |
| <i>Wdr33</i>   | - | + |
| <i>Wdr37</i>   | - | + |
| <i>Wdr38</i>   | - | + |
| <i>Wdr43</i>   | - | + |
| <i>Wdr44</i>   | - | + |
| <i>Wdr45</i>   | - | + |
| <i>Wdr45b</i>  | - | + |
| <i>Wdr46</i>   | - | + |
| <i>Wdr48</i>   | - | + |
| <i>Wdr5</i>    | - | + |
| <i>Wdr53</i>   | - | + |
| <i>Wdr55</i>   | - | + |



|                |   |   |
|----------------|---|---|
| <i>Wdr59</i>   | - | + |
| <i>Wdr5b</i>   | - | + |
| <i>Wdr6</i>    | - | + |
| <i>Wdr61</i>   | - | + |
| <i>Wdr62</i>   | - | + |
| <i>Wdr65</i>   | - | + |
| <i>Wdr67</i>   | - | + |
| <i>Wdr70</i>   | - | + |
| <i>Wdr73</i>   | - | + |
| <i>Wdr75</i>   | - | + |
| <i>Wdr76</i>   | - | + |
| <i>Wdr77</i>   | - | + |
| <i>Wdr78</i>   | - | + |
| <i>Wdr81</i>   | - | + |
| <i>Wdr82</i>   | - | + |
| <i>Wdr83</i>   | - | + |
| <i>Wdr85</i>   | - | + |
| <i>Wdr89</i>   | - | + |
| <i>Wdr90</i>   | - | + |
| <i>Wdr91</i>   | - | + |
| <i>Wdr92</i>   | - | + |
| <i>Wdsub1</i>  | - | + |
| <i>Wdyhv1</i>  | - | + |
| <i>Wee1</i>    | - | + |
| <i>Wfs1</i>    | - | + |
| <i>Whamm</i>   | - | + |
| <i>Whsc111</i> | - | + |
| <i>Wibg</i>    | - | + |
| <i>Wipf2</i>   | - | + |
| <i>Wiz</i>     | - | + |
| <i>Wnk1</i>    | - | + |
| <i>Wrap53</i>  | - | + |
| <i>Wtap</i>    | - | + |
| <i>Wwox</i>    | - | + |
| <i>Wwp1</i>    | - | + |
| <i>Wwp2</i>    | - | + |
| <i>Xab2</i>    | - | + |
| <i>Xaf1</i>    | - | + |
| <i>Xbp1</i>    | - | + |
| <i>Xiap</i>    | - | + |
| <i>Xk</i>      | - | + |
| <i>Xkr5</i>    | - | + |
| <i>Xkr8</i>    | - | + |
| <i>Xkrx</i>    | - | + |
| <i>Xpc</i>     | - | + |
| <i>Xpnpep1</i> | - | + |
| <i>Xpnpep3</i> | - | + |
| <i>Xpo1</i>    | - | + |
| <i>Xpo4</i>    | - | + |
| <i>Xpo5</i>    | - | + |
| <i>Xpo6</i>    | - | + |
| <i>Xpo7</i>    | - | + |
| <i>Xpot</i>    | - | + |

|                 |   |   |
|-----------------|---|---|
| <i>Xpr1</i>     | - | + |
| <i>Xrcc1</i>    | - | + |
| <i>Xrcc2</i>    | - | + |
| <i>Xrcc3</i>    | - | + |
| <i>Xrcc4</i>    | - | + |
| <i>Xrcc5</i>    | - | + |
| <i>Xrcc6</i>    | - | + |
| <i>Xrcc6bp1</i> | - | + |
| <i>Xrn1</i>     | - | + |
| <i>Xrn2</i>     | - | + |
| <i>Xylb</i>     | - | + |
| <i>Xylt2</i>    | - | + |
| <i>Yaf2</i>     | - | + |
| <i>Yars</i>     | - | + |
| <i>Ybey</i>     | - | + |
| <i>Ybx1</i>     | - | + |
| <i>Ydjc</i>     | - | + |
| <i>Yeats2</i>   | - | + |
| <i>Yeats4</i>   | - | + |
| <i>Yif1b</i>    | - | + |
| <i>Yipf2</i>    | - | + |
| <i>Yipf3</i>    | - | + |
| <i>Ykt6</i>     | - | + |
| <i>Yme11</i>    | - | + |
| <i>Yod1</i>     | - | + |
| <i>Ypel3</i>    | - | + |
| <i>Yrdc</i>     | - | + |
| <i>Ythdc1</i>   | - | + |
| <i>Ythdc2</i>   | - | + |
| <i>Ythdf1</i>   | - | + |
| <i>Ythdf2</i>   | - | + |
| <i>Ywhae</i>    | - | + |
| <i>Ywhag</i>    | - | + |
| <i>Ywhah</i>    | - | + |
| <i>Ywhaq</i>    | - | + |
| <i>Ywhaz</i>    | - | + |
| <i>Yy1</i>      | - | + |
| <i>Zadh2</i>    | - | + |
| <i>Zbed3</i>    | - | + |
| <i>Zbed4</i>    | - | + |
| <i>Zbed6</i>    | - | + |
| <i>Zbp1</i>     | - | + |
| <i>Zbtb11</i>   | - | + |
| <i>Zbtb12</i>   | - | + |
| <i>Zbtb14</i>   | - | + |
| <i>Zbtb2</i>    | - | + |
| <i>Zbtb26</i>   | - | + |
| <i>Zbtb3</i>    | - | + |
| <i>Zbtb33</i>   | - | + |
| <i>Zbtb34</i>   | - | + |
| <i>Zbtb37</i>   | - | + |
| <i>Zbtb4</i>    | - | + |
| <i>Zbtb40</i>   | - | + |

|          |   |   |
|----------|---|---|
| Zbtb44   | - | + |
| Zbtb48   | - | + |
| Zbtb49   | - | + |
| Zbtb5    | - | + |
| Zbtb6    | - | + |
| Zbtb7a   | - | + |
| Zbtb8os  | - | + |
| Zbtb9    | - | + |
| Zbtbd6   | - | + |
| Zc3h10   | - | + |
| Zc3h11a  | - | + |
| Zc3h12a  | - | + |
| Zc3h12d  | - | + |
| Zc3h18   | - | + |
| Zc3h3    | - | + |
| Zc3h4    | - | + |
| Zc3h6    | - | + |
| Zc3h7a   | - | + |
| Zc3hav1  | - | + |
| Zc3hav1l | - | + |
| Zc3hc1   | - | + |
| Zcchc10  | - | + |
| Zcchc11  | - | + |
| Zcchc17  | - | + |
| Zcchc18  | - | + |
| Zcchc2   | - | + |
| Zcchc4   | - | + |
| Zcchc7   | - | + |
| Zcchc8   | - | + |
| Zcchc9   | - | + |
| Zcrb1    | - | + |
| Zcwpw1   | - | + |
| Zdhhc12  | - | + |
| Zdhhc13  | - | + |
| Zdhhc16  | - | + |
| Zdhhc20  | - | + |
| Zdhhc21  | - | + |
| Zdhhc23  | - | + |
| Zdhhc3   | - | + |
| Zdhhc4   | - | + |
| Zdhhc5   | - | + |
| Zdhhc6   | - | + |
| Zdhhc7   | - | + |
| Zdhhc8   | - | + |
| Zdhhc9   | - | + |
| Zeb1     | - | + |
| Zer1     | - | + |
| Zfand2a  | - | + |
| Zfand3   | - | + |
| Zfand4   | - | + |
| Zfand5   | - | + |
| Zfand6   | - | + |
| Zfat     | - | + |

|           |   |   |
|-----------|---|---|
| Zfc3h1    | - | + |
| Zfp1      | - | + |
| Zfp110    | - | + |
| Zfp113    | - | + |
| Zfp119b   | - | + |
| Zfp12     | - | + |
| Zfp120    | - | + |
| Zfp128    | - | + |
| Zfp13     | - | + |
| Zfp133-ps | - | + |
| Zfp14     | - | + |
| Zfp142    | - | + |
| Zfp143    | - | + |
| Zfp146    | - | + |
| Zfp148    | - | + |
| Zfp157    | - | + |
| Zfp169    | - | + |
| Zfp174    | - | + |
| Zfp180    | - | + |
| Zfp182    | - | + |
| Zfp189    | - | + |
| Zfp191    | - | + |
| Zfp202    | - | + |
| Zfp207    | - | + |
| Zfp212    | - | + |
| Zfp213    | - | + |
| Zfp217    | - | + |
| Zfp229    | - | + |
| Zfp235    | - | + |
| Zfp236    | - | + |
| Zfp239    | - | + |
| Zfp26     | - | + |
| Zfp260    | - | + |
| Zfp263    | - | + |
| Zfp266    | - | + |
| Zfp27     | - | + |
| Zfp273    | - | + |
| Zfp276    | - | + |
| Zfp28     | - | + |
| Zfp280b   | - | + |
| Zfp280c   | - | + |
| Zfp280d   | - | + |
| Zfp281    | - | + |
| Zfp282    | - | + |
| Zfp296    | - | + |
| Zfp3      | - | + |
| Zfp300    | - | + |
| Zfp316    | - | + |
| Zfp317    | - | + |
| Zfp319    | - | + |
| Zfp324    | - | + |
| Zfp329    | - | + |
| Zfp335    | - | + |

|         |   |   |
|---------|---|---|
| Zfp346  | - | + |
| Zfp35   | - | + |
| Zfp354c | - | + |
| Zfp36   | - | + |
| Zfp362  | - | + |
| Zfp365  | - | + |
| Zfp369  | - | + |
| Zfp3611 | - | + |
| Zfp3612 | - | + |
| Zfp382  | - | + |
| Zfp383  | - | + |
| Zfp384  | - | + |
| Zfp39   | - | + |
| Zfp397  | - | + |
| Zfp398  | - | + |
| Zfp407  | - | + |
| Zfp408  | - | + |
| Zfp410  | - | + |
| Zfp414  | - | + |
| Zfp418  | - | + |
| Zfp420  | - | + |
| Zfp422  | - | + |
| Zfp426  | - | + |
| Zfp429  | - | + |
| Zfp444  | - | + |
| Zfp445  | - | + |
| Zfp446  | - | + |
| Zfp451  | - | + |
| Zfp455  | - | + |
| Zfp456  | - | + |
| Zfp457  | - | + |
| Zfp458  | - | + |
| Zfp459  | - | + |
| Zfp46   | - | + |
| Zfp472  | - | + |
| Zfp473  | - | + |
| Zfp507  | - | + |
| Zfp511  | - | + |
| Zfp512  | - | + |
| Zfp513  | - | + |
| Zfp52   | - | + |
| Zfp524  | - | + |
| Zfp526  | - | + |
| Zfp53   | - | + |
| Zfp54   | - | + |
| Zfp551  | - | + |
| Zfp553  | - | + |
| Zfp558  | - | + |
| Zfp560  | - | + |
| Zfp563  | - | + |
| Zfp566  | - | + |
| Zfp568  | - | + |
| Zfp575  | - | + |

|           |   |   |
|-----------|---|---|
| Zfp579    | - | + |
| Zfp58     | - | + |
| Zfp583    | - | + |
| Zfp59     | - | + |
| Zfp592    | - | + |
| Zfp595    | - | + |
| Zfp597    | - | + |
| Zfp599    | - | + |
| Zfp60     | - | + |
| Zfp605    | - | + |
| Zfp606    | - | + |
| Zfp607    | - | + |
| Zfp608    | - | + |
| Zfp61     | - | + |
| Zfp612    | - | + |
| Zfp617    | - | + |
| Zfp619    | - | + |
| Zfp62     | - | + |
| Zfp622    | - | + |
| Zfp628    | - | + |
| Zfp639    | - | + |
| Zfp64     | - | + |
| Zfp646    | - | + |
| Zfp647    | - | + |
| Zfp653    | - | + |
| Zfp655    | - | + |
| Zfp667    | - | + |
| Zfp668    | - | + |
| Zfp672    | - | + |
| Zfp68     | - | + |
| Zfp687    | - | + |
| Zfp689    | - | + |
| Zfp69     | - | + |
| Zfp691    | - | + |
| Zfp692    | - | + |
| Zfp703    | - | + |
| Zfp706    | - | + |
| Zfp708    | - | + |
| Zfp709    | - | + |
| Zfp71-rs1 | - | + |
| Zfp710    | - | + |
| Zfp712    | - | + |
| Zfp719    | - | + |
| Zfp738    | - | + |
| Zfp74     | - | + |
| Zfp746    | - | + |
| Zfp748    | - | + |
| Zfp758    | - | + |
| Zfp759    | - | + |
| Zfp764    | - | + |
| Zfp768    | - | + |
| Zfp770    | - | + |
| Zfp771    | - | + |

|           |   |   |
|-----------|---|---|
| Zfp773    | - | + |
| Zfp777    | - | + |
| Zfp78     | - | + |
| Zfp780b   | - | + |
| Zfp783    | - | + |
| Zfp784    | - | + |
| Zfp787    | - | + |
| Zfp788    | - | + |
| Zfp790    | - | + |
| Zfp808    | - | + |
| Zfp809    | - | + |
| Zfp81     | - | + |
| Zfp810    | - | + |
| Zfp82     | - | + |
| Zfp825    | - | + |
| Zfp828    | - | + |
| Zfp84     | - | + |
| Zfp85-rs1 | - | + |
| Zfp862    | - | + |
| Zfp865    | - | + |
| Zfp866    | - | + |
| Zfp868    | - | + |
| Zfp87     | - | + |
| Zfp870    | - | + |
| Zfp871    | - | + |
| Zfp873    | - | + |
| Zfp874a   | - | + |
| Zfp874b   | - | + |
| Zfp882    | - | + |
| Zfp91     | - | + |
| Zfp930    | - | + |
| Zfp932    | - | + |
| Zfp933    | - | + |
| Zfp935    | - | + |
| Zfp938    | - | + |
| Zfp939    | - | + |
| Zfp94     | - | + |
| Zfp940    | - | + |
| Zfp942    | - | + |
| Zfp943    | - | + |
| Zfp944    | - | + |
| Zfp945    | - | + |
| Zfp949    | - | + |
| Zfp953    | - | + |
| Zfp954    | - | + |
| Zfp956    | - | + |
| Zfp958    | - | + |
| Zfp963    | - | + |
| Zfp1      | - | + |
| Zfp1      | - | + |
| Zfr       | - | + |
| Zfyve1    | - | + |
| Zfyve16   | - | + |

|          |   |   |
|----------|---|---|
| Zfyve19  | - | + |
| Zfyve20  | - | + |
| Zfyve21  | - | + |
| Zfyve26  | - | + |
| Zgpat    | - | + |
| Zik1     | - | + |
| Zkscan14 | - | + |
| Zkscan17 | - | + |
| Zkscan5  | - | + |
| Zkscan6  | - | + |
| Zkscan7  | - | + |
| Zmat1    | - | + |
| Zmat2    | - | + |
| Zmat5    | - | + |
| Zmiz2    | - | + |
| Zmpste24 | - | + |
| Zmym1    | - | + |
| Zmym2    | - | + |
| Zmym3    | - | + |
| Zmym4    | - | + |
| Zmym5    | - | + |
| Zmym6    | - | + |
| Zmynd12  | - | + |
| Zmynd19  | - | + |
| Zmynd8   | - | + |
| Znf512b  | - | + |
| Znfx1    | - | + |
| Znhit1   | - | + |
| Znhit2   | - | + |
| Znhit3   | - | + |
| Znhit6   | - | + |
| Znrd1    | - | + |
| Znrd1as  | - | + |
| Znrf2    | - | + |
| Zpbp     | - | + |
| Zpbp2    | - | + |
| Zranb3   | - | + |
| Zrsr1    | - | + |
| Zrsr2    | - | + |
| Zscan10  | - | + |
| Zscan12  | - | + |
| Zscan2   | - | + |
| Zscan20  | - | + |
| Zscan21  | - | + |
| Zscan22  | - | + |
| Zscan29  | - | + |
| Zswim1   | - | + |
| Zswim3   | - | + |
| Zswim4   | - | + |
| Zswim7   | - | + |
| Zswim8   | - | + |
| Zufsp    | - | + |
| Zw10     | - | + |



|               |   |   |
|---------------|---|---|
| <i>Zwilch</i> | - | + |
| <i>Zyg11b</i> | - | + |
| <i>Zyx</i>    | - | + |
| <i>Zzef1</i>  | - | + |
| <i>Zzz3</i>   | - | + |

Caganova et al.

## Supplemental Table 2

| Gene           | Expression in Ezh2 <sup>-/-</sup> vs Ezh2 <sup>+/+</sup> (Fold change) | P-value (Wcox) | H3K27me3 | H3K4me3 |
|----------------|------------------------------------------------------------------------|----------------|----------|---------|
| <i>Aicda</i>   | 0.971983721                                                            | 0.364422094    | -        | +       |
| <i>Apaf1</i>   | 1.055596596                                                            | 0.390278828    | -        | +       |
| <i>Atm</i>     | 0.877514154                                                            | 0.737492477    | -        | +       |
| <i>Atr</i>     | 1.103427542                                                            | 0.212659848    | -        | +       |
| <i>Bach2</i>   | 0.868728043                                                            | 0.550803344    | -        | -       |
| <i>Bad</i>     | 1.11836075                                                             | 0.737492477    | -        | +       |
| <i>Bak1</i>    | 1.037826536                                                            | 0.881629813    | -        | +       |
| <i>Bax</i>     | 1.331126632                                                            | 0.033093559    | -        | +       |
| <i>Bcl2</i>    | 1.918240166                                                            | 0.001512047    | +        | +       |
| <i>Bcl2l11</i> | 1.160393254                                                            | 0.245510373    | +        | +       |
| <i>Bcl6</i>    | 1.768103191                                                            | 0.526093741    | -        | +       |
| <i>Bcor</i>    | 1.043465093                                                            | 0.601823508    | +        | +       |
| <i>Bid</i>     | 1.042432672                                                            | 0.737492477    | -        | +       |
| <i>Bmi1</i>    | 2.317052869                                                            | 0.004879655    | +        | +       |
| <i>Brca1</i>   | 1.133441458                                                            | 0.330985614    | -        | +       |
| <i>Brca2</i>   | 1.355571594                                                            | 0.096995645    | -        | +       |
| <i>Btk</i>     | 1.059761871                                                            | 0.478383339    | -        | +       |
| <i>Cbx2</i>    | 1.057823969                                                            | 1              | +        | +       |
| <i>Cbx7</i>    | 1.125094428                                                            | 0.245510373    | +        | +       |
| <i>Ccnd2</i>   | 1.522515653                                                            | 0.105045048    | +        | +       |
| <i>Ccnd3</i>   | 0.82812711                                                             | 0.241698312    | -        | +       |
| <i>Ccng1</i>   | 1.476776543                                                            | 0.069481176    | +        | +       |
| <i>Cd79a</i>   | 0.932294173                                                            | 0.433072545    | -        | +       |
| <i>Cd79b</i>   | 1.051493315                                                            | 0.709547317    | -        | +       |
| <i>Cdkn1a</i>  | 1.461677022                                                            | 0.017682737    | +        | +       |
| <i>Cdkn1b</i>  | 1.525127738                                                            | 0.044237198    | +        | +       |
| <i>Cdkn2a</i>  | 9.638150056                                                            | 0.0000314      | +        | +       |
| <i>Cdkn2c</i>  | 0.938801427                                                            | 0.737492477    | -        | +       |
| <i>Chek1</i>   | 1.276108051                                                            | 0.433072545    | -        | +       |
| <i>Crtc2</i>   | 1.247814595                                                            | 0.202162268    | -        | +       |
| <i>Diablo</i>  | 1.067196054                                                            | 0.654812591    | -        | +       |
| <i>Ebf1</i>    | 1.127046661                                                            | 0.312552064    | -        | +       |
| <i>Eed</i>     | 1.020526173                                                            | 0.709547317    | -        | +       |
| <i>Ezh1</i>    | 4.168868426                                                            | 0.017682737    | +        | +       |
| <i>Fos</i>     | 3.278989477                                                            | 0.202162268    | +        | +       |
| <i>Foxm1</i>   | 0.874270483                                                            | 0.455419839    | -        | +       |
| <i>Foxo3</i>   | 1.748084346                                                            | 0.012612716    | +        | +       |
| <i>Grb2</i>    | 0.963140957                                                            | 0.940655599    | -        | +       |
| <i>Id2</i>     | 1.587463379                                                            | 0.044237198    | +        | +       |
| <i>Ikzf3</i>   | 1.099054497                                                            | 0.737492477    | -        | +       |
| <i>Irf4</i>    | 1.241613371                                                            | 0.012612716    | +        | +       |
| <i>Irf8</i>    | 1.294134422                                                            | 0.053244392    | -        | +       |
| <i>Jak2</i>    | 1.291248968                                                            | 0.2776952      | +        | +       |
| <i>Lck</i>     | 1.214775926                                                            | 0.526093741    | -        | +       |
| <i>Lyn</i>     | 1.065765489                                                            | 0.501947138    | +        | +       |
| <i>Mapk1</i>   | 1.232623979                                                            | 0.881629813    | +        | +       |
| <i>Mcl1</i>    | 1.642946361                                                            | 0.142459815    | -        | +       |
| <i>Mdm2</i>    | 1.082150581                                                            | 0.628085299    | -        | +       |
| <i>Mdm4</i>    | 0.82583183                                                             | 0.823236263    | -        | +       |
| <i>Msh6</i>    | 1.066999608                                                            | 0.628085299    | -        | +       |
| <i>Myb</i>     | 2.301233246                                                            | 0.007822687    | +        | +       |
| <i>Pax5</i>    | 1.452921361                                                            | 0.41135493     | -        | +       |
| <i>Pdcd6ip</i> | 1.078262929                                                            | 0.526093741    | -        | +       |
| <i>Pik3r1</i>  | 1.338423128                                                            | 0.053244392    | +        | +       |
| <i>Plcg2</i>   | 1.191649692                                                            | 0.164528623    | +        | +       |
| <i>Pmaip1</i>  | 1.1071254                                                              | 1              | -        | +       |
| <i>Pou2af1</i> | 1.290385629                                                            | 0.737492477    | -        | +       |
| <i>Prdm1</i>   | 2.337566334                                                            | 0.005350738    | +        | +       |
| <i>Prkce</i>   | 1.029440069                                                            | 0.455419839    | +        | +       |
| <i>Ptk2</i>    | 1.300880094                                                            | 0.261270228    | +        | +       |
| <i>Ring1</i>   | 0.954567782                                                            | 0.794372095    | -        | +       |
| <i>Rnf2</i>    | 1.030208272                                                            | 0.794372095    | +        | +       |
| <i>Spib</i>    | 1.497001147                                                            | 0.36985374     | -        | +       |
| <i>Suz12</i>   | 1.013140785                                                            | 0.911083112    | -        | +       |
| <i>Syk</i>     | 1.111805511                                                            | 0.245510373    | -        | +       |
| <i>Xbp1</i>    | 1.769158904                                                            | 0.019717363    | -        | +       |
| <i>Yy1</i>     | 1.085426417                                                            | 0.823236263    | -        | +       |

**Caganova et al.**  
**Supplemental Table 3**

| Gene           | Expression in Ezh2 <sup>-/-</sup> vs Ezh2 <sup>+/+</sup> (fold change) | P-value (wcox) | H3K27me3 | H3K4me3 |
|----------------|------------------------------------------------------------------------|----------------|----------|---------|
| <i>Irf4</i>    | 1.241613371                                                            | 0.012612716    | +        | +       |
| <i>Cdkn2a</i>  | 9.638150056                                                            | 3.14E-05       | +        | +       |
| <i>Bcl2</i>    | 1.918240166                                                            | 0.001512047    | +        | +       |
| <i>Prdm1</i>   | 2.337566334                                                            | 0.005350738    | +        | +       |
| <i>Myb</i>     | 2.301233246                                                            | 0.007822687    | +        | +       |
| <i>Cdkn1b</i>  | 1.525127738                                                            | 0.044237198    | +        | +       |
| <i>Id2</i>     | 1.587463379                                                            | 0.044237198    | +        | +       |
| <i>Ccnd2</i>   | 1.522515653                                                            | 0.105045048    | +        | +       |
| <i>Plcg2</i>   | 1.191649692                                                            | 0.164528623    | +        | +       |
| <i>Fos</i>     | 3.278989477                                                            | 0.202162268    | +        | +       |
| <i>Bcl2l11</i> | 1.160393254                                                            | 0.245510373    | +        | +       |
| <i>Ptk2</i>    | 1.300880094                                                            | 0.261270228    | +        | +       |
| <i>Lyn1</i>    | 1.065765489                                                            | 0.501947138    | +        | +       |
| <i>Bcor</i>    | 1.043465093                                                            | 0.601823508    | +        | +       |
| <i>Rnf2</i>    | 1.030208272                                                            | 0.794372095    | +        | +       |
| <i>Mapk1</i>   | 1.232623979                                                            | 0.881629813    | +        | +       |
| <i>Xbp1</i>    | 1.769158904                                                            | 0.019717363    | -        | +       |
| <i>Cd86</i>    | 0.938801427                                                            | 0.025135267    | -        | +       |
| <i>Blnk</i>    | 2.317052869                                                            | 0.036843022    | -        | +       |
| <i>Irf8</i>    | 1.294134422                                                            | 0.053244392    | -        | +       |
| <i>Brca2</i>   | 1.355571594                                                            | 0.096995645    | -        | +       |
| <i>Rev3l</i>   | 1.036228859                                                            | 0.102670022    | -        | +       |
| <i>Mcl1</i>    | 1.642946361                                                            | 0.142459815    | -        | +       |
| <i>Rad51</i>   | 0.791832606                                                            | 0.224539652    | -        | +       |
| <i>Ccnd3</i>   | 0.82812711                                                             | 0.241698312    | -        | +       |
| <i>Syk</i>     | 1.111805511                                                            | 0.245510373    | -        | +       |
| <i>Cxcr4</i>   | 3.278989477                                                            | 0.271035316    | -        | +       |
| <i>Ikzf1</i>   | 1.082150581                                                            | 0.271035316    | -        | +       |
| <i>Ebf1</i>    | 1.127046661                                                            | 0.312552064    | -        | +       |
| <i>Aicda</i>   | 0.971983721                                                            | 0.364422094    | -        | +       |
| <i>Polq</i>    | 1.085426417                                                            | 0.40371786     | -        | +       |
| <i>Pax5</i>    | 1.452921361                                                            | 0.41135493     | -        | +       |
| <i>Chek1</i>   | 1.276108051                                                            | 0.433072545    | -        | +       |
| <i>Foxm1</i>   | 0.874270483                                                            | 0.455419839    | -        | +       |
| <i>Itk</i>     | 1.059761871                                                            | 0.478383339    | -        | +       |
| <i>Bcl6</i>    | 1.768103191                                                            | 0.526093741    | -        | +       |
| <i>Lck</i>     | 1.214775926                                                            | 0.526093741    | -        | +       |
| <i>Pdcd6ip</i> | 1.078262929                                                            | 0.526093741    | -        | +       |
| <i>Bach2</i>   | 0.868728043                                                            | 0.550803344    | -        | -       |
| <i>Mdm2</i>    | 1.082150581                                                            | 0.628085299    | -        | +       |
| <i>Eed</i>     | 1.020526173                                                            | 0.709547317    | -        | +       |
| <i>Atm</i>     | 0.877514154                                                            | 0.737492477    | -        | +       |
| <i>Cdkn2c</i>  | 0.938801427                                                            | 0.737492477    | -        | +       |
| <i>Ikzf3</i>   | 1.099054497                                                            | 0.737492477    | -        | +       |
| <i>Pou2af1</i> | 1.290385629                                                            | 0.737492477    | -        | +       |
| <i>Mdm4</i>    | 0.82583183                                                             | 0.823236263    | -        | +       |
| <i>Yy1</i>     | 1.085426417                                                            | 0.823236263    | -        | +       |
| <i>Grb2</i>    | 0.963140957                                                            | 0.940655599    | -        | +       |
| <i>Pmaip1</i>  | 1.1071254                                                              | 1              | -        | +       |

| Caganova et al.             |                                         |                   |
|-----------------------------|-----------------------------------------|-------------------|
| Supplemental Table 4        |                                         |                   |
| qPCR (genomic)              | Sequence                                |                   |
| Ezh2DNA_Fw                  | 5'-CAGCAGTGAGCAGGAAGACA-3'              |                   |
| Ezh2DNA_Rv                  | 5'-AGATTTTGTGGTGGATGCAA-3'              |                   |
| Gapdh4_FW                   | 5'-AGCGCTGACCTTGAGGTCTCCTTG-3'          |                   |
| Gapdh4_RV                   | 5'-GTTGCCTACGCAGGTCTTGCTGAC-3'          |                   |
| qRT-PCR                     |                                         |                   |
| Ezh2RNA_Fw                  | 5'-ACTTACTGCTGGCACCGTCT-3'              |                   |
| Ezh2RNA_Rv                  | 5'-TGCATCCACCACAAAATCAT-3'              |                   |
| Irf4_Fw                     | 5'-CAATGTCCTGTGACGTTTGG-3'              |                   |
| Irf4_Rv                     | 5'-GGCTTCAGCAGACCTTATGCT-3'             |                   |
| p15_Fw                      | 5'-GCAGGCCTTCCAAAATTGA-3'               |                   |
| p15_Rv                      | 5'-AGCTGCAGAAAATGCGTAGGA-3'             |                   |
| p16_Fw                      | 5'-CAATGTCCTGTGACGTTTGG-3'              |                   |
| p16_Rv                      | 5'-GGCTTCAGCAGACCTTCTGCT-3'             |                   |
| p18_Fw                      | 5'-AAATGGATTTGGGAGAACTGC-3'             |                   |
| p18_Rv                      | 5'-AAATTGGGATTAGCACCTCTGA-3'            |                   |
| p21_Fw                      | 5'-CCACAGCGATATCCAGACATTC-3'            |                   |
| p21_Rv                      | 5'-CGGAACAGGTCGGACATCA-3'               |                   |
| p27_Fw                      | 5'-CAGACAATCCGGCTGGGTTA-3'              |                   |
| p27_Rv                      | 5'-GCCCTTTTGTGTTTGCAGAAGA-3'            |                   |
| p57_Fw                      | 5'-CGAGGAGCAGGACGAGAATC-3'              |                   |
| p57_Rv                      | 5'-GAAGAAGTCGTTCCGATTGGC-3'             |                   |
| Blimp1_Fw                   | 5'-GACGGGGGTACTTCTGTTC-3'               |                   |
| Blimp1_Rv                   | 5'-GGCATTCTTGGGAATGTGT-3'               |                   |
| Rplp0_Fw                    | 5'-TTCATTGTGGGAGCAGAC-3'                |                   |
| Rplp0_Rv                    | 5'-CAGCAGTTTCTCCAGAGC-3'                |                   |
| GAPDH- Fw                   | 5'-CTGACTTCAACAGCGACACC-3'              |                   |
| GAPDH- Rv                   | 5'-CCCTGTTGCTGTAGCCAAAT-3'              |                   |
| IRF4- Fw                    | 5'-GACAACGCCTTACCCTTCG-3'               |                   |
| IRF4- Rv                    | 5'-AGGGGTGGCATCATGTAGTT-3'              |                   |
| BLIMP1- Fw                  | 5'-ACGTGTGGGTACGACCTTG-3'               |                   |
| BLIMP1- Rv                  | 5'-CTGCCAATCCCTGAAACCT-3'               |                   |
| EED_Fw                      | 5'-AAATTATTTCTCTTAGGTGAGTCAGTCAGCA-3'   |                   |
| EED_Rv                      | 5'-ACAATGGTTGTTATGATCTTCC-3'            |                   |
| V <sub>H</sub> 186.2 Ig SHM |                                         |                   |
| V <sub>H</sub> 186.2 Fw ext | 5'-TCTTTACAGTTACTGAGCACACAGGAC-3'       |                   |
| V <sub>H</sub> 186.2 Fw int | 5'-CAGTAGCAGGCTTGAGGTCTGGAC-3'          |                   |
| J <sub>H</sub> 2 Rv         | 5'-GGGTCTAGAGGTGTCCCTAGTCCCTTCATGACC-3' |                   |
| ChIP-qPCR                   | ChIP application                        |                   |
| Irf4_aFw                    | 5'-GAGACAAGACTCCGCTTTGC-3'              | H3K27me3          |
| Irf4_aRv                    | 5'-AGGGGATACTGGAATCTGCAC-3'             | H3K27me3, H3K4me3 |
| Irf4_cFw                    | 5'-GAAAGCCAGGGTTTGTCTGA-3'              | Suz12             |
| Irf4_cRv                    | 5'-CTTGCCCATACCCAGGAC-3'                | RNApol-II         |
| Irf4_dFw                    | 5'-AAGCCACGCCCTCTCAAG-3'                |                   |
| Irf4_dRv                    | 5'-CTCCTTCTGCCCGACTACAG-3'              |                   |
| Hox9_Fw                     | 5'-TTGATGTTGACTGGCGATTTTC-3'            | H3K27me3, Suz12   |
| Hox9_Rv                     | 5'-ATCTGTATGCCTAGTCCCCTCC-3'            |                   |
| Gapdh_Fw                    | 5'-ATGCACCTCACACGCCATGCC-3'             | H3K27me3          |
| Gapdh_Rv                    | 5'-TACTTTCGCGCCCTGAGGAGTCAC-3'          |                   |
| Blimp1_Fw                   | 5'-AAAACACGTGTGGTGCAGGAGCG-3'           | H3K27me3, Suz12   |
| Blimp1_Rv                   | 5'-AGGCTGGTACTCAAGGATGC-3'              |                   |
| Olig1_Fw                    | 5'-CCATCTGTTGCAAAATCGTG-3'              | H3K27me3          |
| Olig1_Rv                    | 5'-CTCGAGCTCTATTGCCATCC-3'              |                   |
| qRT-PCR (TaqMan)            | ID (#)                                  |                   |
| <i>Aicda</i>                | Mm00507774_m1                           |                   |
| <i>Apaf1</i>                | Mm01223702_m1                           |                   |
| <i>Atm</i>                  | Mm00431867_m1                           |                   |
| <i>Atr</i>                  | Mm01223652_m1                           |                   |
| <i>Bach2</i>                | Mm00464379_m1                           |                   |
| <i>Bad</i>                  | Mm00432042_m1                           |                   |
| <i>Bak1</i>                 | Mm00432045_m1                           |                   |
| <i>Bax</i>                  | Mm00432050_m1                           |                   |
| <i>Bcl2</i>                 | Mm02528810_s1                           |                   |
| <i>Bcl2l11</i>              | Mm01333921_m1                           |                   |

|                |               |
|----------------|---------------|
| <i>Bcl6</i>    | Mm00477633_m1 |
| <i>Bcor</i>    | Mm00551516_m1 |
| <i>Bid</i>     | Mm00432073_m1 |
| <i>Bmi1</i>    | Mm03053308_g1 |
| <i>Brca1</i>   | Mm00515386_m1 |
| <i>Brca2</i>   | Mm01218747_m1 |
| <i>Btk</i>     | Mm00442712_m1 |
| <i>Cbx2</i>    | Mm00483084_m1 |
| <i>Cbx7</i>    | Mm00520006_m1 |
| <i>Ccnd2</i>   | Mm03053712_s1 |
| <i>Ccnd3</i>   | Mm01273583_m1 |
| <i>Ccng1</i>   | Mm00438084_m1 |
| <i>Cd79a</i>   | Mm00432423_m1 |
| <i>Cd79b</i>   | Mm00434143_m1 |
| <i>Cdkn1a</i>  | Mm01303209_m1 |
| <i>Cdkn1b</i>  | Mm00438168_m1 |
| <i>Cdkn2a</i>  | Mm00494449_m1 |
| <i>Cdkn2c</i>  | Mm00483243_m1 |
| <i>Chek1</i>   | Mm01176757_m1 |
| <i>Crtc2</i>   | Mm01219960_m1 |
| <i>Diablo</i>  | Mm00445735_m1 |
| <i>Ebf1</i>    | Mm00395519_m1 |
| <i>Eed</i>     | Mm00469651_m1 |
| <i>Ezh1</i>    | Mm01292494_g1 |
| <i>Fos</i>     | Mm00487425_m1 |
| <i>Foxm1</i>   | Mm00514924_m1 |
| <i>Foxo3</i>   | Mm01185722_m1 |
| <i>Grb2</i>    | Mm01246322_m1 |
| <i>Id2</i>     | Mm00711781_m1 |
| <i>Ikzf1</i>   | Mm00456421_m1 |
| <i>Ikzf3</i>   | Mm01306721_m1 |
| <i>Irf4</i>    | Mm00516431_m1 |
| <i>Irf8</i>    | Mm00492567_m1 |
| <i>Jak2</i>    | Mm00434561_m1 |
| <i>Lck</i>     | Mm00802897_m1 |
| <i>Lyn</i>     | Mm01217488_m1 |
| <i>Mapk1</i>   | Mm00442479_m1 |
| <i>Mcl1</i>    | Mm00725832_s1 |
| <i>Mdm2</i>    | Mm01233136_m1 |
| <i>Mdm4</i>    | Mm00484944_m1 |
| <i>Msh6</i>    | Mm01227378_m1 |
| <i>Myb</i>     | Mm00504304_m1 |
| <i>Pax5</i>    | Mm00435502_m1 |
| <i>Pdc61p</i>  | Mm00478032_m1 |
| <i>Pik3r1</i>  | Mm01282781_m1 |
| <i>Plcg2</i>   | Mm00549397_m1 |
| <i>Pou2af1</i> | Mm00448326_m1 |
| <i>Prdm1</i>   | Mm00476128_m1 |
| <i>Prkce</i>   | Mm00440894_m1 |
| <i>Ptk2</i>    | Mm00433209_m1 |
| <i>Ring1</i>   | Mm00501395_m1 |
| <i>Rnf2</i>    | Mm00803321_m1 |
| <i>Spib</i>    | Mm01719550_s1 |
| <i>Suz12</i>   | Mm01304152_m1 |
| <i>Syk</i>     | Mm01333032_m1 |
| <i>Xbp1</i>    | Mm00457357_m1 |
| <i>Yy1</i>     | Mm00456392_m1 |

| shRNAs (MISSION) | ID (#)         |
|------------------|----------------|
| mouse <i>Eed</i> |                |
| #20              | TRCN0000095720 |
| #22              | TRCN0000095722 |
| #23              | TRCN0000095723 |
| human <i>EED</i> |                |
| #4               | TRCN0000021204 |
| #6               | TRCN0000021206 |
